# Supplementary material for: Whole-genome long-read sequencing downsampling and its effect on variant-calling precision and recall
Source: Genome Res. 2023 Dec;33(12):2029–40. doi: 10.1101/gr.278070.123 (PMC10760522; doi:10.1101/gr.278070.123)
Supplement: Supplement 3 [file Supplemental_Table_S1.xlsx]

## Sheet: S1
S1 - Input Data
SAMPLE	TECHNOLOGY	N50 (kbp)	COV (X)
HG002	HiFi	17.9	78.62
	ONT	30.23	153.4
	ONT-UL	96.4	33.15
HG00733	HiFi	20.55	99.54
	ONT	33.6	92.27
	ONT-UL	132.69	38.11
