# Supplementary material for: Whole-genome long-read sequencing downsampling and its effect on variant-calling precision and recall
Source: Genome Res. 2023 Dec;33(12):2029–40. doi: 10.1101/gr.278070.123 (PMC10760522; doi:10.1101/gr.278070.123)
Supplement: Supplement 4 [file Supplemental_Table_S2.xlsx]

## Sheet: S2
S2 - SNV (read-based)
SAMPLE	COVERAGE	SVTYPE	TECH	METRIC.Recall	METRIC.Precision	METRIC.F1_Score	CALLER	Filter	Genotype	QQ.Field	QQ	METRIC.Frac_NA	FP.gt	FP.al	Subset.Size	Subset.IS_CONF.Size	Subset.Level	TRUTH.TOTAL	TRUTH.TOTAL.ti	TRUTH.TOTAL.tv	TRUTH.TOTAL.het	TRUTH.TOTAL.homalt	TRUTH.TOTAL.TiTv_ratio	TRUTH.TOTAL.het_hom_ratio	TRUTH.TP	TRUTH.TP.ti	TRUTH.TP.tv	TRUTH.TP.het	TRUTH.TP.homalt	TRUTH.TP.TiTv_ratio	TRUTH.TP.het_hom_ratio	TRUTH.FN	TRUTH.FN.ti	TRUTH.FN.tv	TRUTH.FN.het	TRUTH.FN.homalt	TRUTH.FN.TiTv_ratio	TRUTH.FN.het_hom_ratio	QUERY.TOTAL	QUERY.TOTAL.ti	QUERY.TOTAL.tv	QUERY.TOTAL.het	QUERY.TOTAL.homalt	QUERY.TOTAL.TiTv_ratio	QUERY.TOTAL.het_hom_ratio	QUERY.TP	QUERY.TP.ti	QUERY.TP.tv	QUERY.TP.het
HG002	5	SNV	HiFi	0.89087	0.948314	0.918695	clair3	ALL	*	QUAL	*	0.187374	108896	8758	2809091522	2546949881	0	3365115	2280133	1085711	2060752	1303287	2.10013	1.5812	2997881	2035347	963092	1768950	1228106	2.11335	1.44039	367234	244786	122619	291802	75181	1.99631	3.88133	3894267	2560291	1335241	2343540	1548813	1.91747	1.51312	3001017	2036526	965049	1771186
HG002	5	SNV	HiFi	0.890851	0.948455	0.918751	clair3	PASS	*	QUAL	*	0.186295	108856	8514	2809091522	2546949881	0	3365115	2280133	1085711	2060752	1303287	2.10013	1.5812	2997815	2035321	963052	1768910	1228080	2.11341	1.44039	367300	244812	122659	291842	75207	1.99587	3.88052	3888416	2557445	1332212	2340390	1546144	1.9197	1.51369	3000934	2036493	964999	1771128
HG002	8	SNV	HiFi	0.973513	0.982781	0.978125	clair3	ALL	*	QUAL	*	0.190974	29657	5349	2809091522	2546949881	0	3365115	2280133	1085711	2060752	1303287	2.10013	1.5812	3275983	2221490	1055168	1984367	1290624	2.10534	1.53753	89132	58643	30543	76385	12663	1.92001	6.03214	4125520	2714352	1412606	2564934	1558446	1.92152	1.64583	3280183	2223077	1057781	1987465
HG002	8	SNV	HiFi	0.973503	0.982849	0.978153	clair3	PASS	*	QUAL	*	0.189796	29641	5205	2809091522	2546949881	0	3365115	2280133	1085711	2060752	1303287	2.10013	1.5812	3275948	2221477	1055146	1984346	1290610	2.10537	1.53753	89167	58656	30565	76406	12677	1.91906	6.02714	4119182	2711259	1409339	2561492	1555580	1.92378	1.64665	3280139	2223059	1057755	1987436
HG002	10	SNV	HiFi	0.988188	0.990945	0.989564	clair3	ALL	*	QUAL	*	0.191742	13292	3727	2809091522	2546949881	0	3365115	2280133	1085711	2060752	1303287	2.10013	1.5812	3325365	2253973	1072087	2026067	1298265	2.10242	1.5606	39750	26160	13624	34685	5022	1.92014	6.90661	4157474	2736252	1422694	2598050	1557238	1.92329	1.66837	3329881	2255657	1074919	2029450
HG002	10	SNV	HiFi	0.988178	0.990982	0.989578	clair3	PASS	*	QUAL	*	0.190479	13276	3646	2809091522	2546949881	0	3365115	2280133	1085711	2060752	1303287	2.10013	1.5812	3325334	2253966	1072063	2026047	1298254	2.10246	1.56059	39781	26167	13648	34705	5033	1.91728	6.89549	4150775	2733028	1419175	2594330	1554315	1.92579	1.66911	3329838	2255644	1074889	2029420
HG002	12	SNV	HiFi	0.994261	0.994266	0.994263	clair3	ALL	*	QUAL	*	0.193811	5832	2577	2809091522	2546949881	0	3365115	2280133	1085711	2060752	1303287	2.10013	1.5812	3345804	2267650	1078867	2043533	1301215	2.10188	1.57048	19311	12483	6844	17219	2072	1.82393	8.31033	4180147	2749197	1432489	2616725	1561155	1.91917	1.67615	3350664	2269465	1081912	2047199
HG002	12	SNV	HiFi	0.994258	0.994287	0.994273	clair3	PASS	*	QUAL	*	0.192548	5818	2540	2809091522	2546949881	0	3365115	2280133	1085711	2060752	1303287	2.10013	1.5812	3345794	2267648	1078858	2043531	1301208	2.1019	1.57049	19321	12485	6853	17221	2079	1.82183	8.28331	4173484	2745930	1429055	2613108	1558153	1.9215	1.67705	3350637	2269455	1081894	2047178
HG002	15	SNV	HiFi	0.997424	0.996389	0.996906	clair3	ALL	*	QUAL	*	0.194731	2133	1777	2809091522	2546949881	0	3365115	2280133	1085711	2060752	1303287	2.10013	1.5812	3356447	2274444	1082728	2052987	1302390	2.10066	1.57632	8668	5689	2983	7765	897	1.90714	8.65663	4189469	2754932	1436044	2623795	1563466	1.91842	1.67819	3361467	2276323	1085869	2056787
HG002	15	SNV	HiFi	0.997421	0.996406	0.996913	clair3	PASS	*	QUAL	*	0.193391	2121	1739	2809091522	2546949881	0	3365115	2280133	1085711	2060752	1303287	2.10013	1.5812	3356435	2274444	1082716	2052985	1302380	2.10068	1.57633	8680	5689	2995	7767	907	1.8995	8.5634	4182418	2751489	1432401	2620002	1560253	1.92089	1.67922	3361449	2276322	1085852	2056779
HG002	17	SNV	HiFi	0.998372	0.997301	0.997836	clair3	ALL	*	QUAL	*	0.194844	1299	1325	2809091522	2546949881	0	3365115	2280133	1085711	2060752	1303287	2.10013	1.5812	3359635	2276546	1083811	2055930	1302636	2.1005	1.57828	5480	3587	1900	4822	651	1.88789	7.40707	4190328	2754193	1437645	2624774	1563337	1.91577	1.67896	3364761	2278437	1087046	2059815
HG002	17	SNV	HiFi	0.998369	0.997311	0.99784	clair3	PASS	*	QUAL	*	0.193493	1295	1301	2809091522	2546949881	0	3365115	2280133	1085711	2060752	1303287	2.10013	1.5812	3359626	2276542	1083806	2055927	1302630	2.10051	1.57829	5489	3591	1905	4825	657	1.88504	7.34399	4183245	2750665	1434058	2620970	1560101	1.9181	1.68	3364743	2278430	1087035	2059804
HG002	20	SNV	HiFi	0.998878	0.997582	0.99823	clair3	ALL	*	QUAL	*	0.195668	813	1049	2809091522	2546949881	0	3365115	2280133	1085711	2060752	1303287	2.10013	1.5812	3361340	2277690	1084373	2057530	1302742	2.10047	1.57938	3775	2443	1338	3222	545	1.82586	5.91193	4195760	2756267	1441007	2626428	1567111	1.91274	1.67597	3366623	2279646	1087700	2061575
HG002	20	SNV	HiFi	0.998876	0.997589	0.998232	clair3	PASS	*	QUAL	*	0.194311	809	1034	2809091522	2546949881	0	3365115	2280133	1085711	2060752	1303287	2.10013	1.5812	3361332	2277689	1084366	2057527	1302737	2.10048	1.57939	3783	2444	1345	3225	550	1.8171	5.86364	4188652	2752760	1437363	2622639	1563853	1.91515	1.67704	3366614	2279643	1087694	2061571
HG002	25	SNV	HiFi	0.99924	0.998329	0.998784	clair3	ALL	*	QUAL	*	0.196107	516	701	2809091522	2546949881	0	3365115	2280133	1085711	2060752	1303287	2.10013	1.5812	3362557	2278428	1084856	2058588	1302895	2.10021	1.58001	2558	1705	855	2164	392	1.99415	5.52041	4196536	2755646	1442392	2623516	1570849	1.91047	1.67013	3367929	2280429	1088227	2062702
HG002	25	SNV	HiFi	0.999237	0.998335	0.998786	clair3	PASS	*	QUAL	*	0.194713	512	687	2809091522	2546949881	0	3365115	2280133	1085711	2060752	1303287	2.10013	1.5812	3362546	2278425	1084848	2058587	1302885	2.10023	1.58002	2569	1708	863	2165	402	1.97914	5.38557	4189220	2752043	1438642	2619662	1567434	1.91294	1.67131	3367908	2280421	1088214	2062695
HG002	30	SNV	HiFi	0.999289	0.998401	0.998844	clair3	ALL	*	QUAL	*	0.198353	466	514	2809091522	2546949881	0	3365115	2280133	1085711	2060752	1303287	2.10013	1.5812	3362722	2278536	1084913	2058768	1302881	2.1002	1.58017	2393	1597	798	1984	406	2.00125	4.8867	4208284	2759800	1449975	2630531	1575594	1.90334	1.66955	3368164	2280575	1088316	2062927
HG002	30	SNV	HiFi	0.999287	0.998408	0.998847	clair3	PASS	*	QUAL	*	0.19694	464	503	2809091522	2546949881	0	3365115	2280133	1085711	2060752	1303287	2.10013	1.5812	3362715	2278536	1084906	2058767	1302875	2.10022	1.58017	2400	1597	805	1985	412	1.98385	4.81796	4200835	2756221	1446056	2626612	1572132	1.90603	1.67073	3368150	2280570	1088307	2062921
HG00733	5	SNV	HiFi	0.885976	0.92819	0.906592	clair3	ALL	*	QUAL	*	0.2194	113133	14792	3031399176	2546864659	0	3363189	2277628	1085561	2049176	1309841	2.09811	1.56445	2979705	2023430	956275	1752121	1227584	2.11595	1.42729	383484	254198	129286	297055	82257	1.96617	3.6113	4115166	2699418	1417089	2484167	1628902	1.9049	1.52506	2981625	2024191	957457	1753354
HG00733	5	SNV	HiFi	0.88594	0.928381	0.906664	clair3	PASS	*	QUAL	*	0.218391	113078	14473	3031399176	2546864659	0	3363189	2277628	1085561	2049176	1309841	2.09811	1.56445	2979582	2023368	956214	1752017	1227565	2.11602	1.42723	383607	254260	129347	297159	82276	1.96572	3.61173	4108850	2696363	1413797	2480784	1626006	1.90718	1.52569	2981510	2024131	957402	1753257
HG00733	8	SNV	HiFi	0.968363	0.960085	0.964206	clair3	ALL	*	QUAL	*	0.222141	37249	12276	3031399176	2546864659	0	3363397	2277776	1085621	2049176	1309841	2.09813	1.56445	3256988	2209000	1047988	1966239	1290749	2.10785	1.52333	106409	68776	37633	82937	19092	1.82754	4.34407	4364325	2862541	1503333	2717471	1644464	1.90413	1.6525	3259323	2209904	1049449	1967797
HG00733	8	SNV	HiFi	0.968334	0.960194	0.964247	clair3	PASS	*	QUAL	*	0.221056	37223	12094	3031399176	2546864659	0	3363397	2277776	1085621	2049176	1309841	2.09813	1.56445	3256892	2208957	1047935	1966155	1290737	2.10791	1.52328	106505	68819	37686	83021	19104	1.82612	4.34574	4357628	2859312	1499819	2713872	1641421	1.90644	1.65337	3259234	2209865	1049399	1967720
HG00733	10	SNV	HiFi	0.983328	0.967933	0.97557	clair3	ALL	*	QUAL	*	0.224135	19283	10471	3031399176	2546864659	0	3363420	2277782	1085638	2049176	1309841	2.0981	1.56445	3307345	2242094	1065251	2007431	1299914	2.10476	1.54428	56075	35688	20387	41745	9927	1.75053	4.2052	4407356	2890512	1518343	2760623	1644411	1.90373	1.67879	3309861	2243085	1066808	2009150
HG00733	10	SNV	HiFi	0.983308	0.968034	0.975611	clair3	PASS	*	QUAL	*	0.223001	19247	10318	3031399176	2546864659	0	3363420	2277782	1085638	2049176	1309841	2.0981	1.56445	3307277	2242063	1065214	2007371	1299906	2.1048	1.54424	56143	35719	20424	41805	9935	1.74887	4.20785	4400381	2887120	1514724	2756825	1641278	1.90604	1.67968	3309798	2243056	1066774	2009095
HG00733	12	SNV	HiFi	0.989533	0.971519	0.980443	clair3	ALL	*	QUAL	*	0.223978	11405	9659	3031399176	2546864659	0	3363442	2277802	1085640	2049176	1309841	2.09812	1.56445	3328237	2255713	1072524	2025690	1302547	2.10318	1.55518	35205	22089	13116	23486	7294	1.68413	3.21991	4418094	2897503	1522186	2771268	1644405	1.90351	1.68527	3330891	2256768	1074153	2027502
HG00733	12	SNV	HiFi	0.989516	0.971604	0.980478	clair3	PASS	*	QUAL	*	0.22277	11378	9536	3031399176	2546864659	0	3363442	2277802	1085640	2049176	1309841	2.09812	1.56445	3328178	2255683	1072495	2025637	1302541	2.10321	1.55514	35264	22119	13145	23539	7300	1.68269	3.22452	4410760	2893986	1518333	2767379	1641005	1.90603	1.68639	3330831	2256738	1074123	2027447
HG00733	15	SNV	HiFi	0.992755	0.973482	0.983024	clair3	ALL	*	QUAL	*	0.225193	7520	8721	3031399176	2546864659	0	3363467	2277816	1085651	2049176	1309841	2.09811	1.56445	3339100	2262608	1076492	2035158	1303942	2.10183	1.56077	24367	15208	9159	14018	5899	1.66044	2.37633	4430552	2905131	1526990	2779725	1648446	1.90252	1.68627	3341794	2263686	1078140	2036990
HG00733	15	SNV	HiFi	0.992741	0.973564	0.983059	clair3	PASS	*	QUAL	*	0.223961	7491	8654	3031399176	2546864659	0	3363467	2277816	1085651	2049176	1309841	2.09811	1.56445	3339052	2262581	1076471	2035118	1303934	2.10185	1.56075	24415	15235	9180	14058	5907	1.65959	2.37989	4423083	2901498	1523121	2775716	1645031	1.90497	1.68733	3341744	2263658	1078118	2036948
HG00733	17	SNV	HiFi	0.993448	0.974101	0.983679	clair3	ALL	*	QUAL	*	0.227217	6623	8357	3031399176	2546864659	0	3363454	2277810	1085644	2049176	1309841	2.09812	1.56445	3341417	2264104	1077313	2037332	1304085	2.10162	1.56227	22037	13706	8331	11844	5756	1.64518	2.05768	4442526	2909448	1534696	2784723	1655367	1.89578	1.68224	3344193	2265226	1078999	2039226
HG00733	17	SNV	HiFi	0.993437	0.97418	0.983714	clair3	PASS	*	QUAL	*	0.22587	6604	8281	3031399176	2546864659	0	3363454	2277810	1085644	2049176	1309841	2.09812	1.56445	3341378	2264088	1077290	2037296	1304082	2.10165	1.56225	22076	13722	8354	11880	5759	1.64257	2.06286	4434382	2905524	1530440	2780423	1651569	1.89849	1.6835	3344154	2265208	1078978	2039192
HG00733	20	SNV	HiFi	0.994155	0.974692	0.984327	clair3	ALL	*	QUAL	*	0.226435	6074	8143	3031399176	2546864659	0	3363463	2277819	1085644	2049176	1309841	2.09813	1.56445	3343805	2265580	1078225	2039488	1304317	2.10121	1.56364	19658	12239	7419	9688	5524	1.64968	1.7538	4438497	2906798	1533329	2779384	1656715	1.89574	1.67765	3346571	2266694	1079916	2041372
HG00733	20	SNV	HiFi	0.994145	0.974756	0.984355	clair3	PASS	*	QUAL	*	0.225158	6057	8085	3031399176	2546864659	0	3363463	2277819	1085644	2049176	1309841	2.09813	1.56445	3343769	2265562	1078207	2039455	1304314	2.10123	1.56362	19694	12257	7437	9721	5527	1.64811	1.75882	4430844	2903037	1529397	2775321	1653173	1.89816	1.67878	3346537	2266675	1079901	2041342
HG00733	25	SNV	HiFi	0.99444	0.974966	0.984606	clair3	ALL	*	QUAL	*	0.227935	5756	7850	3031399176	2546864659	0	3363474	2277820	1085654	2049176	1309841	2.09811	1.56445	3344772	2266216	1078556	2040430	1304342	2.10116	1.56434	18702	11604	7098	8746	5499	1.63483	1.59047	4447174	2908813	1539975	2779815	1664950	1.88887	1.66961	3347551	2267321	1080266	2042331
HG00733	25	SNV	HiFi	0.994429	0.975031	0.984634	clair3	PASS	*	QUAL	*	0.226624	5741	7798	3031399176	2546864659	0	3363474	2277820	1085654	2049176	1309841	2.09811	1.56445	3344735	2266197	1078538	2040404	1304331	2.10117	1.56433	18739	11623	7116	8772	5510	1.63336	1.59201	4439287	2904955	1535907	2775671	1661257	1.89136	1.67083	3347513	2267301	1080248	2042305
HG00733	30	SNV	HiFi	0.994558	0.975462	0.984917	clair3	ALL	*	QUAL	*	0.228883	5531	7678	3031399176	2546864659	0	3363451	2277809	1085642	2049176	1309841	2.09812	1.56445	3345146	2266415	1078731	2040768	1304378	2.101	1.56455	18305	11394	6911	8408	5463	1.64868	1.53908	4450898	2910087	1542415	2781625	1666891	1.88671	1.66875	3347946	2267536	1080447	2042682
HG00733	30	SNV	HiFi	0.994545	0.975535	0.984948	clair3	PASS	*	QUAL	*	0.227582	5505	7624	3031399176	2546864659	0	3363451	2277809	1085642	2049176	1309841	2.09812	1.56445	3345102	2266394	1078708	2040730	1304372	2.10103	1.56453	18349	11415	6934	8446	5469	1.64624	1.54434	4443014	2906204	1538378	2777425	1663257	1.88914	1.66987	3347905	2267514	1080428	2042648
HG002	5	SNV	ONT	0.825393	0.899249	0.86074	clair3	ALL	*	QUAL	*	0.17392	144903	15272	2809091522	2546949881	0	3365115	2280133	1085711	2060752	1303287	2.10013	1.5812	2777543	1881765	896092	1596007	1181103	2.09997	1.35129	587572	398368	189619	464745	122184	2.10089	3.80365	3739397	2471197	1268836	2233609	1504927	1.94761	1.4842	2777817	1881864	896267	1596189
HG002	5	SNV	ONT	0.824946	0.900722	0.86117	clair3	PASS	*	QUAL	*	0.171088	143993	13663	2809091522	2546949881	0	3365115	2280133	1085711	2060752	1303287	2.10013	1.5812	2776038	1881054	895296	1595302	1180305	2.10104	1.3516	589077	399079	190415	465450	122982	2.09584	3.7847	3718486	2461011	1258079	2225383	1492282	1.95617	1.49126	2776293	1881147	895458	1595457
HG002	8	SNV	ONT	0.939987	0.960524	0.950144	clair3	ALL	*	QUAL	*	0.177708	48188	13292	2809091522	2546949881	0	3365115	2280133	1085711	2060752	1303287	2.10013	1.5812	3163163	2144243	1019401	1888745	1273705	2.10343	1.48287	201952	135890	66310	172007	29582	2.04931	5.81458	4005435	2641200	1365084	2451468	1552735	1.93483	1.57881	3163616	2144412	1019685	1889092
HG002	8	SNV	ONT	0.939722	0.96143	0.950452	clair3	PASS	*	QUAL	*	0.174678	47885	11948	2809091522	2546949881	0	3365115	2280133	1085711	2060752	1303287	2.10013	1.5812	3162273	2143890	1018864	1888284	1273276	2.1042	1.48301	202842	136243	66847	172468	30011	2.03813	5.74683	3985826	2631800	1354850	2443526	1541100	1.9425	1.58557	3162709	2144047	1019143	1888609
HG002	10	SNV	ONT	0.967089	0.977338	0.972187	clair3	ALL	*	QUAL	*	0.180007	22289	11619	2809091522	2546949881	0	3365115	2280133	1085711	2060752	1303287	2.10013	1.5812	3254366	2206119	1048818	1962541	1290994	2.10343	1.52018	110749	74014	36893	98211	12293	2.00618	7.98918	4061405	2675240	1387132	2495648	1564365	1.92861	1.59531	3254854	2206308	1049117	1962936
HG002	10	SNV	ONT	0.966893	0.978058	0.972443	clair3	PASS	*	QUAL	*	0.176948	22120	10485	2809091522	2546949881	0	3365115	2280133	1085711	2060752	1303287	2.10013	1.5812	3253705	2205887	1048388	1962187	1290688	2.10408	1.52026	111410	74246	37323	98565	12599	1.98928	7.82324	4042496	2666222	1377218	2487921	1553212	1.93595	1.60179	3254179	2206071	1048678	1962560
HG002	12	SNV	ONT	0.979843	0.984848	0.982339	clair3	ALL	*	QUAL	*	0.184513	11571	10163	2809091522	2546949881	0	3365115	2280133	1085711	2060752	1303287	2.10013	1.5812	3297286	2235576	1062343	1998954	1297402	2.10438	1.54074	67829	44557	23368	61798	5885	1.90675	10.5009	4106299	2701822	1405523	2530545	1574241	1.92229	1.60747	3297893	2235809	1062717	1999435
HG002	12	SNV	ONT	0.979706	0.985427	0.982558	clair3	PASS	*	QUAL	*	0.181538	11415	9181	2809091522	2546949881	0	3365115	2280133	1085711	2060752	1303287	2.10013	1.5812	3296822	2235420	1062035	1998678	1297215	2.10485	1.54075	68293	44713	23676	62074	6072	1.88854	10.223	4088352	2693294	1396081	2523083	1563785	1.92918	1.61345	3297396	2235637	1062392	1999130
HG002	15	SNV	ONT	0.987864	0.991356	0.989607	clair3	ALL	*	QUAL	*	0.186014	5199	8371	2809091522	2546949881	0	3365115	2280133	1085711	2060752	1303287	2.10013	1.5812	3324276	2254033	1070897	2022849	1300467	2.10481	1.55548	40839	26100	14814	37903	2820	1.76185	13.4408	4120418	2709070	1412423	2537952	1580906	1.91803	1.60538	3324971	2254298	1071327	2023407
HG002	15	SNV	ONT	0.98775	0.991737	0.98974	clair3	PASS	*	QUAL	*	0.183193	5112	7657	2809091522	2546949881	0	3365115	2280133	1085711	2060752	1303287	2.10013	1.5812	3323893	2253902	1070644	2022650	1300284	2.10518	1.55554	41222	26231	15067	38102	3003	1.74096	12.688	4104099	2701330	1403828	2531036	1571529	1.92426	1.61056	3324559	2254157	1071055	2023175
HG002	17	SNV	ONT	0.990392	0.992609	0.991499	clair3	ALL	*	QUAL	*	0.188133	3891	7574	2809091522	2546949881	0	3365115	2280133	1085711	2060752	1303287	2.10013	1.5812	3332782	2259769	1073693	2030700	1301079	2.10467	1.56078	32333	20364	12018	30052	2208	1.69446	13.6105	4136558	2716483	1421201	2546254	1588656	1.9114	1.60277	3333514	2260050	1074144	2031299
HG002	17	SNV	ONT	0.990284	0.99294	0.99161	clair3	PASS	*	QUAL	*	0.18537	3823	6908	2809091522	2546949881	0	3365115	2280133	1085711	2060752	1303287	2.10013	1.5812	3332420	2259656	1073444	2030512	1300905	2.10505	1.56085	32695	20477	12267	30240	2382	1.66928	12.6952	4120687	2709012	1412777	2539449	1579622	1.91751	1.60763	3333137	2259931	1073886	2031096
HG002	20	SNV	ONT	0.992766	0.994079	0.993422	clair3	ALL	*	QUAL	*	0.189319	2437	6632	2809091522	2546949881	0	3365115	2280133	1085711	2060752	1303287	2.10013	1.5812	3340771	2264977	1076480	2038040	1301715	2.10406	1.56566	24344	15156	9231	22712	1572	1.64186	14.4478	4146519	2720893	1426755	2551160	1593699	1.90705	1.60078	3341602	2265294	1076994	2038733
HG002	20	SNV	ONT	0.992663	0.994332	0.993497	clair3	PASS	*	QUAL	*	0.186682	2364	6078	2809091522	2546949881	0	3365115	2280133	1085711	2060752	1303287	2.10013	1.5812	3340426	2264865	1076247	2037869	1301541	2.10441	1.56574	24689	15268	9464	22883	1746	1.61327	13.106	4131568	2713791	1418882	2544771	1585172	1.91263	1.60536	3341230	2265171	1076745	2038529
HG002	25	SNV	ONT	0.994062	0.995824	0.994942	clair3	ALL	*	QUAL	*	0.190614	1653	5589	2809091522	2546949881	0	3365115	2280133	1085711	2060752	1303287	2.10013	1.5812	3345133	2267904	1077929	2042203	1301899	2.10395	1.56863	19982	12229	7782	18549	1388	1.57145	13.3638	4151363	2722032	1430483	2552504	1597177	1.90288	1.59813	3346022	2268263	1078459	2042936
HG002	25	SNV	ONT	0.993981	0.996022	0.995	clair3	PASS	*	QUAL	*	0.188075	1592	5134	2809091522	2546949881	0	3365115	2280133	1085711	2060752	1303287	2.10013	1.5812	3344859	2267820	1077739	2042072	1301756	2.10424	1.56871	20256	12313	7972	18680	1531	1.54453	12.2012	4137192	2715210	1423109	2546496	1589051	1.90794	1.60253	3345726	2268175	1078251	2042780
HG002	30	SNV	ONT	0.99482	0.996259	0.995539	clair3	ALL	*	QUAL	*	0.193628	1219	4658	2809091522	2546949881	0	3365115	2280133	1085711	2060752	1303287	2.10013	1.5812	3347685	2269344	1079045	2044513	1302128	2.1031	1.57013	17430	10789	6666	16239	1159	1.61851	14.0112	4168333	2727956	1441587	2555351	1611216	1.89233	1.58598	3348655	2269726	1079633	2045329
HG002	30	SNV	ONT	0.994753	0.996417	0.995584	clair3	PASS	*	QUAL	*	0.191193	1182	4278	2809091522	2546949881	0	3365115	2280133	1085711	2060752	1303287	2.10013	1.5812	3347458	2269270	1078892	2044420	1301995	2.10333	1.57022	17657	10863	6819	16332	1292	1.59305	12.6409	4154817	2721604	1434399	2549486	1603596	1.89738	1.58986	3348402	2269649	1079457	2045203
HG00733	5	SNV	ONT	0.791958	0.861585	0.825306	clair3	ALL	*	QUAL	*	0.210537	160838	20161	3031399176	2546864659	0	3362851	2277385	1085466	2049176	1309841	2.09807	1.56445	2663237	1803965	859272	1491147	1172090	2.09941	1.27221	699614	473420	226194	558029	137751	2.09298	4.051	3915040	2575736	1339862	2319663	1594629	1.92239	1.45467	2662968	1803854	859116	1490969
HG00733	5	SNV	ONT	0.791274	0.863701	0.825902	clair3	PASS	*	QUAL	*	0.207607	159459	18108	3031399176	2546864659	0	3362851	2277385	1085466	2049176	1309841	2.09807	1.56445	2660935	1802816	858119	1489962	1170973	2.10089	1.27241	701916	474569	227347	559214	138868	2.08742	4.02695	3887775	2562019	1326280	2309893	1577170	1.93173	1.46458	2660754	1802736	858020	1489828
HG00733	8	SNV	ONT	0.915728	0.93174	0.923665	clair3	ALL	*	QUAL	*	0.21519	63066	17941	3031399176	2546864659	0	3363289	2277697	1085592	2049176	1309841	2.09812	1.56445	3079859	2088212	991647	1808159	1271700	2.1058	1.42184	283430	189485	93945	241017	38141	2.01698	6.31911	4211156	2763065	1448849	2558202	1651855	1.90708	1.54868	3079361	2088018	991354	1807822
HG00733	8	SNV	ONT	0.915277	0.933214	0.924158	clair3	PASS	*	QUAL	*	0.211954	62473	16155	3031399176	2546864659	0	3363289	2277697	1085592	2049176	1309841	2.09812	1.56445	3078342	2087567	990775	1807189	1271153	2.107	1.42169	284947	190130	94817	241987	38688	2.00523	6.25483	4185353	2750439	1435653	2548893	1635391	1.91581	1.55858	3077973	2087432	990552	1806920
HG00733	10	SNV	ONT	0.948273	0.951193	0.949731	clair3	ALL	*	QUAL	*	0.216915	35332	16513	3031399176	2546864659	0	3363325	2277726	1085599	2049176	1309841	2.09813	1.56445	3189349	2162201	1027148	1899428	1289921	2.10505	1.47251	173976	115525	58451	149748	19920	1.97644	7.51747	4281005	2805795	1476066	2617065	1662678	1.90086	1.57401	3188769	2161982	1026798	1899014
HG00733	10	SNV	ONT	0.947871	0.952411	0.950136	clair3	PASS	*	QUAL	*	0.213659	34917	14936	3031399176	2546864659	0	3363325	2277726	1085599	2049176	1309841	2.09813	1.56445	3187998	2161674	1026324	1898524	1289474	2.10623	1.47232	175327	116052	59275	150652	20367	1.95786	7.39687	4256199	2793768	1463265	2607940	1647028	1.90927	1.58342	3187552	2161511	1026052	1898174
HG00733	12	SNV	ONT	0.96437	0.96042	0.962391	clair3	ALL	*	QUAL	*	0.218337	22004	14669	3031399176	2546864659	0	3363377	2277759	1085618	2049176	1309841	2.09812	1.56445	3243540	2199232	1044308	1945971	1297569	2.10592	1.49971	119837	78527	41310	103205	12272	1.90092	8.40979	4319726	2830067	1490600	2644246	1674103	1.89861	1.5795	3242927	2199002	1043936	1945527
HG00733	12	SNV	ONT	0.964037	0.961405	0.962719	clair3	PASS	*	QUAL	*	0.215148	21667	13324	3031399176	2546864659	0	3363377	2277759	1085618	2049176	1309841	2.09812	1.56445	3242420	2198787	1043633	1945216	1297204	2.10686	1.49955	120957	78972	41985	103960	12637	1.88096	8.22664	4296447	2818749	1478610	2635579	1659526	1.90635	1.58815	3241929	2198604	1043336	1944831
HG00733	15	SNV	ONT	0.976076	0.968081	0.972062	clair3	ALL	*	QUAL	*	0.22134	13218	12841	3031399176	2546864659	0	3363406	2277778	1085628	2049176	1309841	2.09812	1.56445	3282939	2226403	1056536	1981570	1301369	2.10727	1.52268	80467	51375	29092	67606	8472	1.76595	7.97993	4354212	2849896	1505323	2672839	1679882	1.89321	1.59109	3282229	2226150	1056095	1981051
HG00733	15	SNV	ONT	0.97577	0.968807	0.972276	clair3	PASS	*	QUAL	*	0.218291	12978	11770	3031399176	2546864659	0	3363406	2277778	1085628	2049176	1309841	2.09812	1.56445	3281909	2225995	1055914	1980837	1301072	2.10812	1.52247	81497	51783	29714	68339	8769	1.74271	7.79325	4332802	2839550	1494234	2664482	1666865	1.90034	1.5985	3281337	2225804	1055549	1980404
HG00733	17	SNV	ONT	0.979796	0.970018	0.974883	clair3	ALL	*	QUAL	*	0.223354	10864	12215	3031399176	2546864659	0	3363414	2277782	1085632	2049176	1309841	2.09812	1.56445	3295461	2234875	1060586	1993158	1302303	2.10721	1.53049	67953	42907	25046	56018	7538	1.71313	7.43141	4373332	2858937	1515443	2684885	1686904	1.88654	1.59161	3294696	2234578	1060133	1992581
HG00733	17	SNV	ONT	0.979528	0.970661	0.975074	clair3	PASS	*	QUAL	*	0.220387	10615	11253	3031399176	2546864659	0	3363414	2277782	1085632	2049176	1309841	2.09812	1.56445	3294557	2234509	1060048	1992535	1302022	2.10793	1.53034	68857	43273	25584	56641	7819	1.69141	7.24402	4352736	2848832	1504922	2676879	1674348	1.89301	1.59876	3293890	2234249	1059656	1992021
HG00733	20	SNV	ONT	0.983173	0.972449	0.977782	clair3	ALL	*	QUAL	*	0.22346	9038	11129	3031399176	2546864659	0	3363441	2277803	1085638	2049176	1309841	2.09812	1.56445	3306846	2242741	1064105	2004026	1302820	2.10763	1.53822	56595	35062	21533	45150	7021	1.62829	6.43071	4378060	2862122	1517032	2687758	1688697	1.88666	1.59162	3306071	2242452	1063638	2003442
HG00733	20	SNV	ONT	0.982912	0.972947	0.977904	clair3	PASS	*	QUAL	*	0.220678	8815	10365	3031399176	2546864659	0	3363441	2277803	1085638	2049176	1309841	2.09812	1.56445	3305968	2242404	1063564	2003415	1302553	2.10839	1.53807	57473	35399	22074	45761	7288	1.60365	6.27895	4359198	2853049	1507219	2680097	1677526	1.89292	1.59765	3305316	2242164	1063171	2002903
HG00733	25	SNV	ONT	0.985453	0.974295	0.979842	clair3	ALL	*	QUAL	*	0.226467	7448	9871	3031399176	2546864659	0	3363422	2277792	1085630	2049176	1309841	2.09813	1.56445	3314494	2247903	1066591	2011387	1303107	2.10756	1.54353	48928	29889	19039	37789	6734	1.56988	5.61167	4396825	2869039	1528922	2694033	1701097	1.87651	1.5837	3313665	2247598	1066086	2010748
HG00733	25	SNV	ONT	0.985228	0.974699	0.979935	clair3	PASS	*	QUAL	*	0.223809	7238	9223	3031399176	2546864659	0	3363422	2277792	1085630	2049176	1309841	2.09813	1.56445	3313736	2247601	1066135	2010876	1302860	2.10818	1.54343	49686	30191	19495	38300	6981	1.54865	5.48632	4379080	2860490	1519702	2686715	1690704	1.88227	1.58911	3313004	2247338	1065685	2010310
HG00733	30	SNV	ONT	0.986656	0.975098	0.980843	clair3	ALL	*	QUAL	*	0.22856	6745	9082	3031399176	2546864659	0	3363433	2277799	1085634	2049176	1309841	2.09813	1.56445	3318553	2250469	1068084	2015279	1303274	2.10701	1.54632	44880	27330	17550	33897	6567	1.55726	5.16172	4410448	2874431	1537159	2698297	1710449	1.86996	1.57754	3317669	2250115	1067574	2014600
HG00733	30	SNV	ONT	0.986434	0.975424	0.980898	clair3	PASS	*	QUAL	*	0.226009	6582	8575	3031399176	2546864659	0	3363433	2277799	1085634	2049176	1309841	2.09813	1.56445	3317806	2250180	1067626	2014764	1303042	2.10765	1.5462	45627	27619	18008	34412	6799	1.53371	5.06133	4393600	2866401	1528302	2691075	1700877	1.87555	1.58217	3317033	2249874	1067179	2014155
HG002	5	SNV	UL-ONT	0.809975	0.872377	0.840019	clair3	ALL	*	QUAL	*	0.174033	157364	18506	2809091522	2546949881	0	3365115	2280133	1085711	2060752	1303287	2.10013	1.5812	2725660	1847083	878832	1561478	1163809	2.10175	1.3417	639455	433050	206879	499274	139478	2.09325	3.57959	3783097	2503294	1280371	2280104	1502200	1.95513	1.51784	2725930	1847192	878993	1561647
HG002	5	SNV	UL-ONT	0.809396	0.874227	0.840563	clair3	PASS	*	QUAL	*	0.17086	156194	16528	2809091522	2546949881	0	3365115	2280133	1085711	2060752	1303287	2.10013	1.5812	2723710	1846191	877768	1560650	1162695	2.10328	1.34227	641405	433942	207943	500102	140592	2.08683	3.55712	3757928	2491194	1267272	2270067	1487107	1.96579	1.5265	2723959	1846284	877924	1560793
HG002	8	SNV	UL-ONT	0.933043	0.946321	0.939635	clair3	ALL	*	QUAL	*	0.181615	55928	15431	2809091522	2546949881	0	3365115	2280133	1085711	2060752	1303287	2.10013	1.5812	3139798	2128512	1011757	1875707	1263420	2.10378	1.48463	225317	151621	73954	185045	39867	2.05021	4.64156	4054743	2672757	1382797	2496816	1556783	1.93286	1.60383	3140215	2128679	1012007	1876026
HG002	8	SNV	UL-ONT	0.932726	0.947534	0.940072	clair3	PASS	*	QUAL	*	0.178205	55448	13827	2809091522	2546949881	0	3365115	2280133	1085711	2060752	1303287	2.10013	1.5812	3138731	2128080	1011118	1875181	1262885	2.10468	1.48484	226384	152053	74593	185571	40402	2.03844	4.59311	4031337	2661765	1370358	2487093	1543134	1.94239	1.61172	3139117	2128228	1011356	1875463
HG002	10	SNV	UL-ONT	0.965311	0.96758	0.966444	clair3	ALL	*	QUAL	*	0.186839	26972	13496	2809091522	2546949881	0	3365115	2280133	1085711	2060752	1303287	2.10013	1.5812	3248381	2202167	1046765	1961388	1286192	2.10378	1.52496	116734	77966	38946	99364	17095	2.0019	5.81246	4129213	2716966	1413196	2554645	1573224	1.92257	1.62383	3248857	2202352	1047056	1961753
HG002	10	SNV	UL-ONT	0.965048	0.968529	0.966786	clair3	PASS	*	QUAL	*	0.183513	26694	12088	2809091522	2546949881	0	3365115	2280133	1085711	2060752	1303287	2.10013	1.5812	3247499	2201829	1046220	1960948	1285751	2.10456	1.52514	117616	78304	39491	99804	17536	1.98283	5.69138	4107233	2706511	1401652	2545331	1560581	1.93094	1.63101	3247964	2202011	1046503	1961290
HG002	12	SNV	UL-ONT	0.980058	0.978835	0.979446	clair3	ALL	*	QUAL	*	0.191123	13132	11624	2809091522	2546949881	0	3365115	2280133	1085711	2060752	1303287	2.10013	1.5812	3298007	2236013	1062601	2001908	1295214	2.10428	1.54562	67108	44120	23110	58844	8073	1.90913	7.28899	4166183	2736300	1430905	2580673	1584062	1.91229	1.62915	3298605	2236239	1062973	2002399
HG002	12	SNV	UL-ONT	0.979843	0.979611	0.979727	clair3	PASS	*	QUAL	*	0.187859	12928	10418	2809091522	2546949881	0	3365115	2280133	1085711	2060752	1303287	2.10013	1.5812	3297283	2235748	1062142	2001563	1294835	2.10494	1.54581	67832	44385	23569	59189	8452	1.88319	7.00296	4145221	2726292	1419925	2571894	1571909	1.92003	1.63616	3297863	2235968	1062502	2002028
HG002	15	SNV	UL-ONT	0.989111	0.986685	0.987897	clair3	ALL	*	QUAL	*	0.192735	5727	9557	2809091522	2546949881	0	3365115	2280133	1085711	2060752	1303287	2.10013	1.5812	3328472	2256808	1072306	2027983	1299544	2.10463	1.56053	36643	23325	13405	32769	3743	1.74002	8.75474	4179606	2742258	1438419	2585653	1592394	1.90644	1.62375	3329127	2257055	1072714	2028514
HG002	15	SNV	UL-ONT	0.988932	0.987233	0.988082	clair3	PASS	*	QUAL	*	0.189603	5590	8641	2809091522	2546949881	0	3365115	2280133	1085711	2060752	1303287	2.10013	1.5812	3327871	2256600	1071913	2027706	1299220	2.10521	1.56071	37244	23533	13798	33046	4067	1.70554	8.1254	4160357	2733008	1428395	2577543	1581291	1.91334	1.63002	3328496	2256834	1072304	2028199
HG002	17	SNV	UL-ONT	0.992419	0.989124	0.990768	clair3	ALL	*	QUAL	*	0.195942	3755	8634	2809091522	2546949881	0	3365115	2280133	1085711	2060752	1303287	2.10013	1.5812	3339603	2264322	1075943	2038010	1300621	2.1045	1.56695	25512	15811	9768	22742	2666	1.61865	8.53038	4199999	2752259	1448854	2596382	1602006	1.89961	1.62071	3340313	2264611	1076364	2038594
HG002	17	SNV	UL-ONT	0.992266	0.989583	0.990922	clair3	PASS	*	QUAL	*	0.192789	3638	7777	2809091522	2546949881	0	3365115	2280133	1085711	2060752	1303287	2.10013	1.5812	3339088	2264157	1075592	2037784	1300333	2.10503	1.56712	26027	15976	10119	22968	2954	1.57881	7.77522	4180974	2743379	1438678	2588371	1591034	1.90687	1.62685	3339772	2264436	1075997	2038341
HG002	20	SNV	UL-ONT	0.994791	0.991455	0.99312	clair3	ALL	*	QUAL	*	0.198273	2318	7494	2809091522	2546949881	0	3365115	2280133	1085711	2060752	1303287	2.10013	1.5812	3347586	2269643	1078623	2045232	1301350	2.1042	1.57162	17529	10490	7088	15520	1937	1.47997	8.01239	4212464	2757146	1456465	2602139	1608657	1.89304	1.61758	3348390	2269968	1079102	2045894
HG002	20	SNV	UL-ONT	0.994667	0.991799	0.993231	clair3	PASS	*	QUAL	*	0.195263	2227	6836	2809091522	2546949881	0	3365115	2280133	1085711	2060752	1303287	2.10013	1.5812	3347169	2269517	1078332	2045047	1301118	2.10466	1.57176	17946	10616	7379	15705	2169	1.43868	7.24066	4194717	2748719	1447108	2594636	1598459	1.89946	1.62321	3347959	2269834	1078805	2045692
HG002	25	SNV	UL-ONT	0.996495	0.993304	0.994897	clair3	ALL	*	QUAL	*	0.203048	1572	6235	2809091522	2546949881	0	3365115	2280133	1085711	2060752	1303287	2.10013	1.5812	3353320	2273413	1080600	2050479	1301812	2.10384	1.5751	11795	6720	5111	10273	1475	1.31481	6.96475	4237163	2767298	1471027	2614748	1620706	1.8812	1.61334	3354205	2273768	1081130	2051242
HG002	25	SNV	UL-ONT	0.996388	0.99356	0.994972	clair3	PASS	*	QUAL	*	0.200186	1500	5691	2809091522	2546949881	0	3365115	2280133	1085711	2060752	1303287	2.10013	1.5812	3352959	2273305	1080346	2050329	1301603	2.10424	1.57523	12156	6828	5365	10423	1684	1.27269	6.18943	4220439	2759474	1462096	2607643	1611130	1.88734	1.61852	3353829	2273652	1080869	2051071
HG002	30	SNV	UL-ONT	0.996572	0.994777	0.995674	clair3	ALL	*	QUAL	*	0.205521	1259	5282	2809091522	2546949881	0	3365115	2280133	1085711	2060752	1303287	2.10013	1.5812	3353580	2273536	1080745	2050476	1302070	2.10367	1.57478	11535	6597	4966	10276	1217	1.32843	8.44371	4244437	2768510	1477100	2612875	1629849	1.87429	1.60314	3354502	2273901	1081302	2051279
HG002	30	SNV	UL-ONT	0.996472	0.994982	0.995727	clair3	PASS	*	QUAL	*	0.202783	1181	4832	2809091522	2546949881	0	3365115	2280133	1085711	2060752	1303287	2.10013	1.5812	3353244	2273443	1080501	2050344	1301868	2.10406	1.57492	11871	6690	5210	10408	1419	1.28407	7.33474	4228535	2760878	1468804	2606145	1620711	1.87968	1.60803	3354143	2273800	1081043	2051120
HG00733	5	SNV	UL-ONT	0.806149	0.855204	0.829953	clair3	ALL	*	QUAL	*	0.207467	160394	20761	3031399176	2546864659	0	3362912	2277439	1085473	2049176	1309841	2.09811	1.56445	2711009	1835269	875740	1550874	1160135	2.09568	1.3368	651903	442170	209733	498302	149706	2.10825	3.32854	3999414	2644479	1355550	2421832	1576739	1.95085	1.53598	2710712	1835145	875571	1550697
HG00733	5	SNV	UL-ONT	0.805412	0.857312	0.830552	clair3	PASS	*	QUAL	*	0.204613	158956	18711	3031399176	2546864659	0	3362912	2277439	1085473	2049176	1309841	2.09811	1.56445	2708529	1834097	874432	1549611	1158918	2.09747	1.33712	654383	443342	211041	499565	150923	2.10074	3.31007	3971814	2630819	1341582	2410794	1560214	1.96098	1.54517	2708359	1834025	874338	1549494
HG00733	8	SNV	UL-ONT	0.930611	0.92464	0.927616	clair3	ALL	*	QUAL	*	0.215502	59436	18760	3031399176	2546864659	0	3363263	2277680	1085583	2049176	1309841	2.09812	1.56445	3129891	2121036	1008855	1862934	1266957	2.10242	1.4704	233372	156644	76728	186242	42884	2.04155	4.34293	4314082	2833908	1481017	2674687	1638213	1.91349	1.63269	3129339	2120834	1008514	1862559
HG00733	8	SNV	UL-ONT	0.93008	0.92603	0.92805	clair3	PASS	*	QUAL	*	0.212343	58757	17010	3031399176	2546864659	0	3363263	2277680	1085583	2049176	1309841	2.09812	1.56445	3128103	2120301	1007802	1861860	1266243	2.10389	1.47038	235160	157379	77781	187316	43598	2.02336	4.29644	4288075	2821335	1467556	2663701	1623224	1.92247	1.64099	3127695	2120150	1007554	1861569
HG00733	10	SNV	UL-ONT	0.959887	0.945634	0.952707	clair3	ALL	*	QUAL	*	0.219729	31633	16992	3031399176	2546864659	0	3363321	2277732	1085589	2049176	1309841	2.09815	1.56445	3228407	2188412	1039995	1940528	1287879	2.10425	1.50676	134914	89320	45594	108648	21962	1.95903	4.94709	4374564	2868693	1506803	2715155	1658037	1.90383	1.63757	3227775	2188181	1039610	1940064
HG00733	10	SNV	UL-ONT	0.959443	0.946807	0.953083	clair3	PASS	*	QUAL	*	0.216479	31184	15396	3031399176	2546864659	0	3363321	2277732	1085589	2049176	1309841	2.09815	1.56445	3226914	2187864	1039050	1939594	1287320	2.10564	1.50669	136407	89868	46539	109582	22521	1.93103	4.86577	4349183	2856562	1493517	2704556	1643308	1.91264	1.6458	3226411	2187683	1038744	1939212
HG00733	12	SNV	UL-ONT	0.973887	0.955858	0.964788	clair3	ALL	*	QUAL	*	0.221369	19003	15369	3031399176	2546864659	0	3363319	2277719	1085600	2049176	1309841	2.09812	1.56445	3275493	2220722	1054771	1979116	1296377	2.10541	1.52665	87826	56997	30829	70060	13464	1.84881	5.20351	4400063	2883718	1517357	2731680	1666905	1.90049	1.63877	3274793	2220483	1054326	1978577
HG00733	12	SNV	UL-ONT	0.973497	0.956807	0.96508	clair3	PASS	*	QUAL	*	0.218244	18648	14077	3031399176	2546864659	0	3363319	2277719	1085600	2049176	1309841	2.09812	1.56445	3274182	2220248	1053934	1978308	1295874	2.10663	1.52662	89137	57471	31666	70868	13967	1.81491	5.07396	4376547	2872458	1505065	2721846	1653268	1.90853	1.64634	3273614	2220046	1053584	1977863
HG00733	15	SNV	UL-ONT	0.983659	0.964147	0.973805	clair3	ALL	*	QUAL	*	0.228334	11363	13461	3031399176	2546864659	0	3363399	2277774	1085625	2049176	1309841	2.09812	1.56445	3308438	2243294	1065144	2007768	1300670	2.10609	1.54364	54961	34480	20481	41408	9171	1.68351	4.5151	4445818	2903850	1543083	2758583	1685595	1.88185	1.63656	3307686	2243025	1064682	2007207
HG00733	15	SNV	UL-ONT	0.983309	0.964865	0.974	clair3	PASS	*	QUAL	*	0.225278	11070	12454	3031399176	2546864659	0	3363399	2277774	1085625	2049176	1309841	2.09812	1.56445	3307261	2242879	1064382	2007060	1300201	2.10721	1.54365	56138	34895	21243	42116	9640	1.64266	4.36888	4423570	2893292	1531357	2749197	1672779	1.88936	1.64349	3306628	2242650	1063999	2006575
HG00733	17	SNV	UL-ONT	0.986846	0.965609	0.976112	clair3	ALL	*	QUAL	*	0.22933	9474	12676	3031399176	2546864659	0	3363424	2277793	1085631	2049176	1309841	2.09813	1.56445	3319182	2250686	1068496	2017634	1301548	2.10641	1.55018	44242	27107	17135	31542	8293	1.58197	3.80345	4459194	2910578	1549716	2769009	1688543	1.87814	1.63988	3318381	2250384	1068013	2017013
HG00733	17	SNV	UL-ONT	0.986534	0.966255	0.976289	clair3	PASS	*	QUAL	*	0.226405	9215	11780	3031399176	2546864659	0	3363424	2277793	1085631	2049176	1309841	2.09813	1.56445	3318131	2250306	1067825	2017008	1301123	2.10737	1.55021	45293	27487	17806	32168	8718	1.54369	3.68984	4438107	2900663	1538512	2760002	1676503	1.88537	1.64629	3317439	2250043	1067412	2016457
HG00733	20	SNV	UL-ONT	0.98921	0.968534	0.978763	clair3	ALL	*	QUAL	*	0.231601	7681	11715	3031399176	2546864659	0	3363409	2277783	1085626	2049176	1309841	2.09813	1.56445	3327117	2256089	1071028	2024587	1302530	2.10647	1.55435	36292	21694	14598	24589	7311	1.48609	3.36329	4469476	2913408	1557226	2772918	1694820	1.8709	1.63611	3326277	2255768	1070527	2023939
HG00733	20	SNV	UL-ONT	0.988917	0.969064	0.97889	clair3	PASS	*	QUAL	*	0.228774	7454	10956	3031399176	2546864659	0	3363409	2277783	1085626	2049176	1309841	2.09813	1.56445	3326132	2255719	1070413	2024010	1302122	2.10734	1.55439	37277	22064	15213	25166	7719	1.45034	3.26027	4449498	2904035	1546597	2764298	1683497	1.87769	1.642	3325410	2255445	1069983	2023429
HG00733	25	SNV	UL-ONT	0.990843	0.970094	0.980359	clair3	ALL	*	QUAL	*	0.235913	6750	10724	3031399176	2546864659	0	3363428	2277795	1085633	2049176	1309841	2.09813	1.56445	3332628	2259645	1072983	2029811	1302817	2.10595	1.55802	30800	18150	12650	19365	7024	1.43478	2.75698	4494844	2924372	1571681	2780849	1712201	1.86067	1.62414	3331742	2259318	1072443	2029107
HG00733	25	SNV	UL-ONT	0.990573	0.970521	0.980445	clair3	PASS	*	QUAL	*	0.23317	6542	10058	3031399176	2546864659	0	3363428	2277795	1085633	2049176	1309841	2.09813	1.56445	3331722	2259320	1072402	2029275	1302447	2.10678	1.55805	31706	18475	13231	19901	7394	1.39634	2.69151	4475757	2915412	1561518	2772620	1701389	1.86704	1.62962	3330968	2259034	1071953	2028664
HG00733	30	SNV	UL-ONT	0.991352	0.971775	0.981466	clair3	ALL	*	QUAL	*	0.239587	6278	9898	3031399176	2546864659	0	3363443	2277801	1085642	2049176	1309841	2.09811	1.56445	3334357	2260802	1073555	2031262	1303095	2.1059	1.5588	29086	16999	12087	17914	6746	1.40639	2.6555	4511124	2929115	1583245	2785335	1723943	1.85007	1.61568	3333497	2260484	1073033	2030590
HG00733	30	SNV	UL-ONT	0.991111	0.972131	0.98153	clair3	PASS	*	QUAL	*	0.236931	6079	9366	3031399176	2546864659	0	3363443	2277801	1085642	2049176	1309841	2.09811	1.56445	3333547	2260514	1073033	2030785	1302762	2.10666	1.55883	29896	17287	12609	18391	7079	1.371	2.59797	4492822	2920563	1573456	2777300	1713728	1.85615	1.62062	3332791	2260230	1072581	2030174
HG002	5	SNV	HiFi	0.776724	0.954066	0.85631	deepvariant	ALL	*	GQ	*	0.146301	121881	2170	2809091522	2546949881	0	3365115	2280133	1085711	2060752	1303287	2.10013	1.5812	2613766	1771444	842693	1363615	1249600	2.10212	1.09124	751349	508689	243018	697137	53687	2.09322	12.9852	3212057	2135897	1076881	1621092	1589905	1.98341	1.01962	2616173	1772355	844189	1365199
HG002	5	SNV	HiFi	0.776724	0.954066	0.85631	deepvariant	PASS	*	GQ	*	0.146301	121881	2170	2809091522	2546949881	0	3365115	2280133	1085711	2060752	1303287	2.10013	1.5812	2613766	1771444	842693	1363615	1249600	2.10212	1.09124	751349	508689	243018	697137	53687	2.09322	12.9852	3212057	2135897	1076881	1621092	1589905	1.98341	1.01962	2616173	1772355	844189	1365199
HG002	8	SNV	HiFi	0.932395	0.987782	0.95929	deepvariant	ALL	*	GQ	*	0.148852	34497	2002	2809091522	2546949881	0	3365115	2280133	1085711	2060752	1303287	2.10013	1.5812	3137616	2126355	1011844	1839496	1297259	2.10147	1.41799	227499	153778	73867	221256	6028	2.08182	36.7047	3736040	2482602	1254550	2177060	1557330	1.97888	1.39794	3141073	2127657	1013999	1841999
HG002	8	SNV	HiFi	0.932395	0.987782	0.95929	deepvariant	PASS	*	GQ	*	0.148852	34497	2002	2809091522	2546949881	0	3365115	2280133	1085711	2060752	1303287	2.10013	1.5812	3137616	2126355	1011844	1839496	1297259	2.10147	1.41799	227499	153778	73867	221256	6028	2.08182	36.7047	3736040	2482602	1254550	2177060	1557330	1.97888	1.39794	3141073	2127657	1013999	1841999
HG002	10	SNV	HiFi	0.96954	0.994333	0.98178	deepvariant	ALL	*	GQ	*	0.150677	15043	1679	2809091522	2546949881	0	3365115	2280133	1085711	2060752	1303287	2.10013	1.5812	3262613	2211028	1052232	1960946	1300690	2.10127	1.50762	102502	69105	33479	99806	2597	2.06413	38.4313	3867833	2569156	1299898	2323685	1542273	1.97643	1.50666	3266426	2212480	1054593	1963815
HG002	10	SNV	HiFi	0.96954	0.994333	0.98178	deepvariant	PASS	*	GQ	*	0.150677	15043	1679	2809091522	2546949881	0	3365115	2280133	1085711	2060752	1303287	2.10013	1.5812	3262613	2211028	1052232	1960946	1300690	2.10127	1.50762	102502	69105	33479	99806	2597	2.06413	38.4313	3867833	2569156	1299898	2323685	1542273	1.97643	1.50666	3266426	2212480	1054593	1963815
HG002	12	SNV	HiFi	0.985764	0.996865	0.991284	deepvariant	ALL	*	GQ	*	0.152766	6904	1421	2809091522	2546949881	0	3365115	2280133	1085711	2060752	1303287	2.10013	1.5812	3317209	2248319	1069584	2014491	1301687	2.10205	1.5476	47906	31814	16127	46261	1600	1.97272	28.9131	3932542	2610392	1323500	2390486	1540049	1.97234	1.55221	3321341	2249872	1072163	2017618
HG002	12	SNV	HiFi	0.985764	0.996865	0.991284	deepvariant	PASS	*	GQ	*	0.152766	6904	1421	2809091522	2546949881	0	3365115	2280133	1085711	2060752	1303287	2.10013	1.5812	3317209	2248319	1069584	2014491	1301687	2.10205	1.5476	47906	31814	16127	46261	1600	1.97272	28.9131	3932542	2610392	1323500	2390486	1540049	1.97234	1.55221	3321341	2249872	1072163	2017618
HG002	15	SNV	HiFi	0.994684	0.99819	0.996434	deepvariant	ALL	*	GQ	*	0.15526	2896	1137	2809091522	2546949881	0	3365115	2280133	1085711	2060752	1303287	2.10013	1.5812	3347227	2268359	1079581	2044191	1301978	2.10115	1.57007	17888	11774	6130	16561	1309	1.92072	12.6516	3974778	2636282	1339902	2432870	1539781	1.96752	1.58001	3351576	2270003	1082286	2047523
HG002	15	SNV	HiFi	0.994684	0.99819	0.996434	deepvariant	PASS	*	GQ	*	0.15526	2896	1137	2809091522	2546949881	0	3365115	2280133	1085711	2060752	1303287	2.10013	1.5812	3347227	2268359	1079581	2044191	1301978	2.10115	1.57007	17888	11774	6130	16561	1309	1.92072	12.6516	3974778	2636282	1339902	2432870	1539781	1.96752	1.58001	3351576	2270003	1082286	2047523
HG002	17	SNV	HiFi	0.996966	0.998601	0.997783	deepvariant	ALL	*	GQ	*	0.155355	1969	996	2809091522	2546949881	0	3365115	2280133	1085711	2060752	1303287	2.10013	1.5812	3354905	2273602	1082019	2051777	1302066	2.10126	1.57579	10210	6531	3692	8975	1221	1.76896	7.35053	3982809	2641681	1342569	2440677	1539980	1.96763	1.58488	3359356	2275273	1084799	2055213
HG002	17	SNV	HiFi	0.996966	0.998601	0.997783	deepvariant	PASS	*	GQ	*	0.155355	1969	996	2809091522	2546949881	0	3365115	2280133	1085711	2060752	1303287	2.10013	1.5812	3354905	2273602	1082019	2051777	1302066	2.10126	1.57579	10210	6531	3692	8975	1221	1.76896	7.35053	3982809	2641681	1342569	2440677	1539980	1.96763	1.58488	3359356	2275273	1084799	2055213
HG002	20	SNV	HiFi	0.998155	0.998816	0.998486	deepvariant	ALL	*	GQ	*	0.15713	1463	841	2809091522	2546949881	0	3365115	2280133	1085711	2060752	1303287	2.10013	1.5812	3358908	2276329	1083298	2055621	1302221	2.1013	1.57855	6207	3804	2413	5131	1066	1.57646	4.81332	3995214	2648324	1348355	2448552	1544482	1.96411	1.58535	3363459	2278039	1086139	2059141
HG002	20	SNV	HiFi	0.998155	0.998816	0.998486	deepvariant	PASS	*	GQ	*	0.15713	1463	841	2809091522	2546949881	0	3365115	2280133	1085711	2060752	1303287	2.10013	1.5812	3358908	2276329	1083298	2055621	1302221	2.1013	1.57855	6207	3804	2413	5131	1066	1.57646	4.81332	3995214	2648324	1348355	2448552	1544482	1.96411	1.58535	3363459	2278039	1086139	2059141
HG002	25	SNV	HiFi	0.9988	0.99912	0.99896	deepvariant	ALL	*	GQ	*	0.158595	1015	709	2809091522	2546949881	0	3365115	2280133	1085711	2060752	1303287	2.10013	1.5812	3361076	2277662	1084136	2057647	1302361	2.1009	1.57994	4039	2471	1575	3105	926	1.56889	3.35313	4003618	2652138	1352938	2452030	1549405	1.96028	1.58256	3365699	2279409	1087012	2061250
HG002	25	SNV	HiFi	0.9988	0.99912	0.99896	deepvariant	PASS	*	GQ	*	0.158595	1015	709	2809091522	2546949881	0	3365115	2280133	1085711	2060752	1303287	2.10013	1.5812	3361076	2277662	1084136	2057647	1302361	2.1009	1.57994	4039	2471	1575	3105	926	1.56889	3.35313	4003618	2652138	1352938	2452030	1549405	1.96028	1.58256	3365699	2279409	1087012	2061250
HG002	30	SNV	HiFi	0.998936	0.999197	0.999066	deepvariant	ALL	*	GQ	*	0.160702	1003	570	2809091522	2546949881	0	3365115	2280133	1085711	2060752	1303287	2.10013	1.5812	3361533	2277992	1084267	2058148	1302313	2.10095	1.58038	3582	2141	1444	2604	974	1.48269	2.67351	4014028	2657424	1358124	2457605	1554141	1.95669	1.58133	3366259	2279776	1087209	2061811
HG002	30	SNV	HiFi	0.998936	0.999197	0.999066	deepvariant	PASS	*	GQ	*	0.160702	1003	570	2809091522	2546949881	0	3365115	2280133	1085711	2060752	1303287	2.10013	1.5812	3361533	2277992	1084267	2058148	1302313	2.10095	1.58038	3582	2141	1444	2604	974	1.48269	2.67351	4014028	2657424	1358124	2457605	1554141	1.95669	1.58133	3366259	2279776	1087209	2061811
HG00733	5	SNV	HiFi	0.770674	0.934917	0.844887	deepvariant	ALL	*	GQ	*	0.166351	123143	6446	3031399176	2546864659	0	3362876	2277393	1085483	2049176	1309841	2.09805	1.56445	2591680	1758510	833170	1341238	1250442	2.11063	1.07261	771196	518883	252313	707938	59399	2.05651	11.9183	3327470	2212774	1115421	1669456	1656939	1.9838	1.00755	2593406	1759172	834251	1342263
HG00733	5	SNV	HiFi	0.770674	0.934917	0.844887	deepvariant	PASS	*	GQ	*	0.166351	123143	6446	3031399176	2546864659	0	3362876	2277393	1085483	2049176	1309841	2.09805	1.56445	2591680	1758510	833170	1341238	1250442	2.11063	1.07261	771196	518883	252313	707938	59399	2.05651	11.9183	3327470	2212774	1115421	1669456	1656939	1.9838	1.00755	2593406	1759172	834251	1342263
HG00733	8	SNV	HiFi	0.926066	0.966069	0.945645	deepvariant	ALL	*	GQ	*	0.170416	41079	7435	3031399176	2546864659	0	3363229	2277657	1085572	2049176	1309841	2.09812	1.56445	3114572	2112053	1002519	1816066	1298506	2.10675	1.39858	248657	165604	83053	233110	11335	1.99396	20.5655	3889015	2582964	1307191	2255145	1632150	1.97597	1.3817	3116793	2112914	1003906	1817533
HG00733	8	SNV	HiFi	0.926066	0.966069	0.945645	deepvariant	PASS	*	GQ	*	0.170416	41079	7435	3031399176	2546864659	0	3363229	2277657	1085572	2049176	1309841	2.09812	1.56445	3114572	2112053	1002519	1816066	1298506	2.10675	1.39858	248657	165604	83053	233110	11335	1.99396	20.5655	3889015	2582964	1307191	2255145	1632150	1.97597	1.3817	3116793	2112914	1003906	1817533
HG00733	10	SNV	HiFi	0.963645	0.972519	0.968062	deepvariant	ALL	*	GQ	*	0.17145	21037	7546	3031399176	2546864659	0	3363326	2277713	1085613	2049176	1309841	2.09809	1.56445	3241052	2197373	1043679	1938507	1302545	2.10541	1.48825	122274	80340	41934	110669	7296	1.91587	15.1684	4025281	2672686	1353879	2408088	1615267	1.9741	1.49083	3243493	2198346	1045177	1940174
HG00733	10	SNV	HiFi	0.963645	0.972519	0.968062	deepvariant	PASS	*	GQ	*	0.17145	21037	7546	3031399176	2546864659	0	3363326	2277713	1085613	2049176	1309841	2.09809	1.56445	3241052	2197373	1043679	1938507	1302545	2.10541	1.48825	122274	80340	41934	110669	7296	1.91587	15.1684	4025281	2672686	1353879	2408088	1615267	1.9741	1.49083	3243493	2198346	1045177	1940174
HG00733	12	SNV	HiFi	0.980581	0.974918	0.977742	deepvariant	ALL	*	GQ	*	0.173251	12123	7620	3031399176	2546864659	0	3363381	2277751	1085630	2049176	1309841	2.09809	1.56445	3298068	2235701	1062367	1994765	1303303	2.10445	1.53055	65313	42050	23263	54411	6538	1.80759	8.32227	4095025	2717753	1378678	2481852	1611060	1.97127	1.54051	3300644	2236720	1063950	1996530
HG00733	12	SNV	HiFi	0.980581	0.974918	0.977742	deepvariant	PASS	*	GQ	*	0.173251	12123	7620	3031399176	2546864659	0	3363381	2277751	1085630	2049176	1309841	2.09809	1.56445	3298068	2235701	1062367	1994765	1303303	2.10445	1.53055	65313	42050	23263	54411	6538	1.80759	8.32227	4095025	2717753	1378678	2481852	1611060	1.97127	1.54051	3300644	2236720	1063950	1996530
HG00733	15	SNV	HiFi	0.989772	0.976116	0.982897	deepvariant	ALL	*	GQ	*	0.175222	8152	7417	3031399176	2546864659	0	3363450	2277801	1085649	2049176	1309841	2.0981	1.56445	3329048	2256437	1072611	2025499	1303549	2.10369	1.55383	34402	21364	13038	23677	6292	1.63859	3.76303	4138290	2744570	1395177	2525322	1610763	1.96718	1.56778	3331653	2257462	1074222	2027289
HG00733	15	SNV	HiFi	0.989772	0.976116	0.982897	deepvariant	PASS	*	GQ	*	0.175222	8152	7417	3031399176	2546864659	0	3363450	2277801	1085649	2049176	1309841	2.0981	1.56445	3329048	2256437	1072611	2025499	1303549	2.10369	1.55383	34402	21364	13038	23677	6292	1.63859	3.76303	4138290	2744570	1395177	2525322	1610763	1.96718	1.56778	3331653	2257462	1074222	2027289
HG00733	17	SNV	HiFi	0.991667	0.976368	0.983958	deepvariant	ALL	*	GQ	*	0.177143	7264	7287	3031399176	2546864659	0	3363429	2277789	1085640	2049176	1309841	2.09811	1.56445	3335400	2260643	1074757	2031867	1303533	2.1034	1.55874	28029	17146	10883	17309	6308	1.57548	2.74398	4154892	2753500	1402841	2536174	1616511	1.9628	1.56892	3338085	2261705	1076414	2033704
HG00733	17	SNV	HiFi	0.991667	0.976368	0.983958	deepvariant	PASS	*	GQ	*	0.177143	7264	7287	3031399176	2546864659	0	3363429	2277789	1085640	2049176	1309841	2.09811	1.56445	3335400	2260643	1074757	2031867	1303533	2.1034	1.55874	28029	17146	10883	17309	6308	1.57548	2.74398	4154892	2753500	1402841	2536174	1616511	1.9628	1.56892	3338085	2261705	1076414	2033704
HG00733	20	SNV	HiFi	0.993155	0.97666	0.984838	deepvariant	ALL	*	GQ	*	0.178173	6706	7362	3031399176	2546864659	0	3363435	2277799	1085636	2049176	1309841	2.09812	1.56445	3340412	2263884	1076528	2036740	1303672	2.10295	1.56231	23023	13915	9108	12436	6169	1.52778	2.01589	4165113	2759176	1407433	2545046	1617828	1.96043	1.57313	3343110	2264965	1078180	2038595
HG00733	20	SNV	HiFi	0.993155	0.97666	0.984838	deepvariant	PASS	*	GQ	*	0.178173	6706	7362	3031399176	2546864659	0	3363435	2277799	1085636	2049176	1309841	2.09812	1.56445	3340412	2263884	1076528	2036740	1303672	2.10295	1.56231	23023	13915	9108	12436	6169	1.52778	2.01589	4165113	2759176	1407433	2545046	1617828	1.96043	1.57313	3343110	2264965	1078180	2038595
HG00733	25	SNV	HiFi	0.993732	0.976878	0.985233	deepvariant	ALL	*	GQ	*	0.179753	6416	7110	3031399176	2546864659	0	3363420	2277790	1085630	2049176	1309841	2.09813	1.56445	3342338	2265079	1077259	2038574	1303764	2.10263	1.56361	21082	12711	8371	10602	6077	1.51846	1.74461	4174591	2763424	1412660	2546687	1625654	1.95618	1.56656	3345021	2266141	1078917	2040426
HG00733	25	SNV	HiFi	0.993732	0.976878	0.985233	deepvariant	PASS	*	GQ	*	0.179753	6416	7110	3031399176	2546864659	0	3363420	2277790	1085630	2049176	1309841	2.09813	1.56445	3342338	2265079	1077259	2038574	1303764	2.10263	1.56361	21082	12711	8371	10602	6077	1.51846	1.74461	4174591	2763424	1412660	2546687	1625654	1.95618	1.56656	3345021	2266141	1078917	2040426
HG00733	30	SNV	HiFi	0.993928	0.977046	0.985415	deepvariant	ALL	*	GQ	*	0.180801	6187	7144	3031399176	2546864659	0	3363436	2277799	1085637	2049176	1309841	2.09812	1.56445	3343012	2265432	1077580	2039141	1303871	2.10233	1.56391	20424	12367	8057	10035	5970	1.53494	1.6809	4180118	2766108	1415501	2549918	1627920	1.95415	1.56637	3345749	2266520	1079264	2041039
HG00733	30	SNV	HiFi	0.993928	0.977046	0.985415	deepvariant	PASS	*	GQ	*	0.180801	6187	7144	3031399176	2546864659	0	3363436	2277799	1085637	2049176	1309841	2.09812	1.56445	3343012	2265432	1077580	2039141	1303871	2.10233	1.56391	20424	12367	8057	10035	5970	1.53494	1.6809	4180118	2766108	1415501	2549918	1627920	1.95415	1.56637	3345749	2266520	1079264	2041039
HG002	5	SNV	ONT	0.6167	0.923445	0.739526	deepvariant	ALL	*	GQ	*	0.123986	152713	2702	2809091522	2546949881	0	3365115	2280133	1085711	2060752	1303287	2.10013	1.5812	2075266	1410716	664659	978142	1096957	2.12247	0.891687	1289849	869417	421052	1082610	206330	2.06487	5.24698	2565475	1726363	839344	1137649	1427470	2.0568	0.796969	2075343	1410748	664704	978188
HG002	5	SNV	ONT	0.6167	0.923445	0.739526	deepvariant	PASS	*	GQ	*	0.123986	152713	2702	2809091522	2546949881	0	3365115	2280133	1085711	2060752	1303287	2.10013	1.5812	2075266	1410716	664659	978142	1096957	2.12247	0.891687	1289849	869417	421052	1082610	206330	2.06487	5.24698	2565475	1726363	839344	1137649	1427470	2.0568	0.796969	2075343	1410748	664704	978188
HG002	8	SNV	ONT	0.856628	0.972903	0.911071	deepvariant	ALL	*	GQ	*	0.12412	67984	3435	2809091522	2546949881	0	3365115	2280133	1085711	2060752	1303287	2.10013	1.5812	2882653	1955947	927079	1612097	1270004	2.1098	1.26936	482462	324186	158632	448655	33283	2.04364	13.48	3383064	2267060	1116613	1843590	1538562	2.0303	1.19826	2882865	1956033	927205	1612265
HG002	8	SNV	ONT	0.856628	0.972903	0.911071	deepvariant	PASS	*	GQ	*	0.12412	67984	3435	2809091522	2546949881	0	3365115	2280133	1085711	2060752	1303287	2.10013	1.5812	2882653	1955947	927079	1612097	1270004	2.1098	1.26936	482462	324186	158632	448655	33283	2.04364	13.48	3383064	2267060	1116613	1843590	1538562	2.0303	1.19826	2882865	1956033	927205	1612265
HG002	10	SNV	ONT	0.924678	0.986458	0.95457	deepvariant	ALL	*	GQ	*	0.127576	31955	3847	2809091522	2546949881	0	3365115	2280133	1085711	2060752	1303287	2.10013	1.5812	3111649	2109689	1002474	1821201	1289679	2.10448	1.41214	253466	170444	83237	239551	13608	2.0477	17.6037	3615958	2419033	1197744	2085706	1529016	2.01966	1.36408	3111929	2109800	1002643	1821458
HG002	10	SNV	ONT	0.924678	0.986458	0.95457	deepvariant	PASS	*	GQ	*	0.127576	31955	3847	2809091522	2546949881	0	3365115	2280133	1085711	2060752	1303287	2.10013	1.5812	3111649	2109689	1002474	1821201	1289679	2.10448	1.41214	253466	170444	83237	239551	13608	2.0477	17.6037	3615958	2419033	1197744	2085706	1529016	2.01966	1.36408	3111929	2109800	1002643	1821458
HG002	12	SNV	ONT	0.958875	0.992521	0.975408	deepvariant	ALL	*	GQ	*	0.131332	14549	4147	2809091522	2546949881	0	3365115	2280133	1085711	2060752	1303287	2.10013	1.5812	3226723	2187937	1039397	1929949	1295871	2.10501	1.48931	138392	92196	46314	130803	7416	1.99067	17.6379	3742931	2501357	1242557	2214841	1526614	2.01307	1.45082	3227046	2188087	1039570	1930253
HG002	12	SNV	ONT	0.958875	0.992521	0.975408	deepvariant	PASS	*	GQ	*	0.131332	14549	4147	2809091522	2546949881	0	3365115	2280133	1085711	2060752	1303287	2.10013	1.5812	3226723	2187937	1039397	1929949	1295871	2.10501	1.48931	138392	92196	46314	130803	7416	1.99067	17.6379	3742931	2501357	1242557	2214841	1526614	2.01307	1.45082	3227046	2188087	1039570	1930253
HG002	15	SNV	ONT	0.980818	0.996147	0.988423	deepvariant	ALL	*	GQ	*	0.134026	4613	4169	2809091522	2546949881	0	3365115	2280133	1085711	2060752	1303287	2.10013	1.5812	3300567	2237674	1063546	2000398	1299199	2.10397	1.53972	64548	42459	22165	60354	4088	1.91559	14.7637	3826620	2554173	1273491	2296838	1528206	2.00565	1.50296	3300984	2237877	1063760	2000797
HG002	15	SNV	ONT	0.980818	0.996147	0.988423	deepvariant	PASS	*	GQ	*	0.134026	4613	4169	2809091522	2546949881	0	3365115	2280133	1085711	2060752	1303287	2.10013	1.5812	3300567	2237674	1063546	2000398	1299199	2.10397	1.53972	64548	42459	22165	60354	4088	1.91559	14.7637	3826620	2554173	1273491	2296838	1528206	2.00565	1.50296	3300984	2237877	1063760	2000797
HG002	17	SNV	ONT	0.987352	0.996731	0.992019	deepvariant	ALL	*	GQ	*	0.136452	2807	4018	2809091522	2546949881	0	3365115	2280133	1085711	2060752	1303287	2.10013	1.5812	3322552	2252777	1070468	2021417	1300112	2.10448	1.5548	42563	27356	15243	39335	3175	1.79466	12.389	3860744	2575744	1286113	2325813	1533268	2.00274	1.5169	3323039	2253023	1070709	2021885
HG002	17	SNV	ONT	0.987352	0.996731	0.992019	deepvariant	PASS	*	GQ	*	0.136452	2807	4018	2809091522	2546949881	0	3365115	2280133	1085711	2060752	1303287	2.10013	1.5812	3322552	2252777	1070468	2021417	1300112	2.10448	1.5548	42563	27356	15243	39335	3175	1.79466	12.389	3860744	2575744	1286113	2325813	1533268	2.00274	1.5169	3323039	2253023	1070709	2021885
HG002	20	SNV	ONT	0.992381	0.99731	0.994839	deepvariant	ALL	*	GQ	*	0.138068	1472	3830	2809091522	2546949881	0	3365115	2280133	1085711	2060752	1303287	2.10013	1.5812	3339476	2264231	1075940	2037520	1300920	2.10442	1.56621	25639	15902	9771	23232	2367	1.62747	9.81496	3885425	2590828	1295769	2346526	1537142	1.99945	1.52655	3339963	2264460	1076198	2037984
HG002	20	SNV	ONT	0.992381	0.99731	0.994839	deepvariant	PASS	*	GQ	*	0.138068	1472	3830	2809091522	2546949881	0	3365115	2280133	1085711	2060752	1303287	2.10013	1.5812	3339476	2264231	1075940	2037520	1300920	2.10442	1.56621	25639	15902	9771	23232	2367	1.62747	9.81496	3885425	2590828	1295769	2346526	1537142	1.99945	1.52655	3339963	2264460	1076198	2037984
HG002	25	SNV	ONT	0.995368	0.997754	0.99656	deepvariant	ALL	*	GQ	*	0.140283	895	3592	2809091522	2546949881	0	3365115	2280133	1085711	2060752	1303287	2.10013	1.5812	3349529	2270942	1079287	2047067	1301422	2.10411	1.57295	15586	9191	6424	13685	1865	1.43073	7.3378	3905457	2602754	1303899	2362552	1541113	1.99613	1.53302	3350047	2271188	1079559	2047574
HG002	25	SNV	ONT	0.995368	0.997754	0.99656	deepvariant	PASS	*	GQ	*	0.140283	895	3592	2809091522	2546949881	0	3365115	2280133	1085711	2060752	1303287	2.10013	1.5812	3349529	2270942	1079287	2047067	1301422	2.10411	1.57295	15586	9191	6424	13685	1865	1.43073	7.3378	3905457	2602754	1303899	2362552	1541113	1.99613	1.53302	3350047	2271188	1079559	2047574
HG002	30	SNV	ONT	0.996681	0.998043	0.997361	deepvariant	ALL	*	GQ	*	0.142441	648	3082	2809091522	2546949881	0	3365115	2280133	1085711	2060752	1303287	2.10013	1.5812	3353945	2273745	1080912	2051140	1301749	2.10354	1.57568	11170	6388	4799	9612	1538	1.33111	6.24967	3919360	2609577	1310976	2367600	1549989	1.99056	1.52749	3354507	2274017	1081202	2051686
HG002	30	SNV	ONT	0.996681	0.998043	0.997361	deepvariant	PASS	*	GQ	*	0.142441	648	3082	2809091522	2546949881	0	3365115	2280133	1085711	2060752	1303287	2.10013	1.5812	3353945	2273745	1080912	2051140	1301749	2.10354	1.57568	11170	6388	4799	9612	1538	1.33111	6.24967	3919360	2609577	1310976	2367600	1549989	1.99056	1.52749	3354507	2274017	1081202	2051686
HG00733	5	SNV	ONT	0.601426	0.904491	0.722463	deepvariant	ALL	*	GQ	*	0.147433	159635	3638	3031399176	2546864659	0	3362126	2276923	1085203	2049176	1309841	2.09815	1.56445	2022071	1376917	645154	925304	1096767	2.13425	0.843665	1340055	900006	440049	1123872	213074	2.04524	5.27456	2622105	1764949	857338	1130462	1491369	2.05864	0.758003	2022008	1376884	645125	925277
HG00733	5	SNV	ONT	0.601426	0.904491	0.722463	deepvariant	PASS	*	GQ	*	0.147433	159635	3638	3031399176	2546864659	0	3362126	2276923	1085203	2049176	1309841	2.09815	1.56445	2022071	1376917	645154	925304	1096767	2.13425	0.843665	1340055	900006	440049	1123872	213074	2.04524	5.27456	2622105	1764949	857338	1130462	1491369	2.05864	0.758003	2022008	1376884	645125	925277
HG00733	8	SNV	ONT	0.830143	0.950768	0.88637	deepvariant	ALL	*	GQ	*	0.147382	78892	5609	3031399176	2546864659	0	3362986	2277492	1085494	2049176	1309841	2.09812	1.56445	2791758	1896092	895666	1528666	1263092	2.11696	1.21026	571228	381400	189828	520510	46749	2.00919	11.1341	3443582	2308516	1135649	1837664	1605046	2.03277	1.14493	2791512	1895991	895526	1528521
HG00733	8	SNV	ONT	0.830143	0.950768	0.88637	deepvariant	PASS	*	GQ	*	0.147382	78892	5609	3031399176	2546864659	0	3362986	2277492	1085494	2049176	1309841	2.09812	1.56445	2791758	1896092	895666	1528666	1263092	2.11696	1.21026	571228	381400	189828	520510	46749	2.00919	11.1341	3443582	2308516	1135649	1837664	1605046	2.03277	1.14493	2791512	1895991	895526	1528521
HG00733	10	SNV	ONT	0.905461	0.965213	0.934382	deepvariant	ALL	*	GQ	*	0.149154	41482	6481	3031399176	2546864659	0	3363081	2277562	1085519	2049176	1309841	2.09813	1.56445	3045138	2066466	978672	1759066	1286072	2.1115	1.36778	317943	211096	106847	290110	23769	1.97568	12.2054	3707491	2480929	1227291	2106452	1599921	2.02147	1.3166	3044766	2066314	978461	1758796
HG00733	10	SNV	ONT	0.905461	0.965213	0.934382	deepvariant	PASS	*	GQ	*	0.149154	41482	6481	3031399176	2546864659	0	3363081	2277562	1085519	2049176	1309841	2.09813	1.56445	3045138	2066466	978672	1759066	1286072	2.1115	1.36778	317943	211096	106847	290110	23769	1.97568	12.2054	3707491	2480929	1227291	2106452	1599921	2.02147	1.3166	3044766	2066314	978461	1758796
HG00733	12	SNV	ONT	0.93983	0.971948	0.955619	deepvariant	ALL	*	GQ	*	0.144856	22455	6863	3031399176	2546864659	0	3363182	2277634	1085548	2049176	1309841	2.09814	1.56445	3160820	2144056	1016764	1870346	1290474	2.10871	1.44935	202362	133578	68784	178830	19367	1.94199	9.23375	3802399	2541840	1261426	2224023	1577050	2.01505	1.41024	3160384	2143879	1016514	1870025
HG00733	12	SNV	ONT	0.93983	0.971948	0.955619	deepvariant	PASS	*	GQ	*	0.144856	22455	6863	3031399176	2546864659	0	3363182	2277634	1085548	2049176	1309841	2.09814	1.56445	3160820	2144056	1016764	1870346	1290474	2.10871	1.44935	202362	133578	68784	178830	19367	1.94199	9.23375	3802399	2541840	1261426	2224023	1577050	2.01505	1.41024	3160384	2143879	1016514	1870025
HG00733	15	SNV	ONT	0.969365	0.975978	0.97266	deepvariant	ALL	*	GQ	*	0.155175	11438	7141	3031399176	2546864659	0	3363323	2277728	1085595	2049176	1309841	2.09814	1.56445	3260286	2211865	1048421	1961339	1298947	2.10971	1.50995	103037	65863	37174	87837	10894	1.77175	8.06288	3953545	2639340	1315190	2353466	1598574	2.00681	1.47223	3259819	2211678	1048155	1960987
HG00733	15	SNV	ONT	0.969365	0.975978	0.97266	deepvariant	PASS	*	GQ	*	0.155175	11438	7141	3031399176	2546864659	0	3363323	2277728	1085595	2049176	1309841	2.09814	1.56445	3260286	2211865	1048421	1961339	1298947	2.10971	1.50995	103037	65863	37174	87837	10894	1.77175	8.06288	3953545	2639340	1315190	2353466	1598574	2.00681	1.47223	3259819	2211678	1048155	1960987
HG00733	17	SNV	ONT	0.977293	0.976474	0.976884	deepvariant	ALL	*	GQ	*	0.157931	8856	7315	3031399176	2546864659	0	3363305	2277713	1085592	2049176	1309841	2.09813	1.56445	3286936	2229781	1057155	1986817	1300119	2.10923	1.52818	76369	47932	28437	62359	9722	1.68555	6.41422	3996814	2665878	1331979	2390178	1605049	2.00144	1.48916	3286415	2229563	1056867	1986411
HG00733	17	SNV	ONT	0.977293	0.976474	0.976884	deepvariant	PASS	*	GQ	*	0.157931	8856	7315	3031399176	2546864659	0	3363305	2277713	1085592	2049176	1309841	2.09813	1.56445	3286936	2229781	1057155	1986817	1300119	2.10923	1.52818	76369	47932	28437	62359	9722	1.68555	6.41422	3996814	2665878	1331979	2390178	1605049	2.00144	1.48916	3286415	2229563	1056867	1986411
HG00733	20	SNV	ONT	0.983594	0.977224	0.980399	deepvariant	ALL	*	GQ	*	0.159499	7292	7195	3031399176	2546864659	0	3363385	2277775	1085610	2049176	1309841	2.09815	1.56445	3308206	2244485	1063721	2007087	1301119	2.11003	1.54259	55179	33290	21889	42089	8722	1.52086	4.82561	4027078	2684694	1343434	2417264	1608185	1.99838	1.5031	3307674	2244254	1063437	2006668
HG00733	20	SNV	ONT	0.983594	0.977224	0.980399	deepvariant	PASS	*	GQ	*	0.159499	7292	7195	3031399176	2546864659	0	3363385	2277775	1085610	2049176	1309841	2.09815	1.56445	3308206	2244485	1063721	2007087	1301119	2.11003	1.54259	55179	33290	21889	42089	8722	1.52086	4.82561	4027078	2684694	1343434	2417264	1608185	1.99838	1.5031	3307674	2244254	1063437	2006668
HG00733	25	SNV	ONT	0.98767	0.977661	0.98264	deepvariant	ALL	*	GQ	*	0.162824	6403	6806	3031399176	2546864659	0	3363385	2277775	1085610	2049176	1309841	2.09815	1.56445	3321913	2253692	1068221	2020090	1301823	2.10976	1.55174	41472	24083	17389	29086	8018	1.38496	3.62759	4057921	2702738	1356364	2438763	1617363	1.99263	1.50786	3321305	2253438	1067886	2019604
HG00733	25	SNV	ONT	0.98767	0.977661	0.98264	deepvariant	PASS	*	GQ	*	0.162824	6403	6806	3031399176	2546864659	0	3363385	2277775	1085610	2049176	1309841	2.09815	1.56445	3321913	2253692	1068221	2020090	1301823	2.10976	1.55174	41472	24083	17389	29086	8018	1.38496	3.62759	4057921	2702738	1356364	2438763	1617363	1.99263	1.50786	3321305	2253438	1067886	2019604
HG00733	30	SNV	ONT	0.989494	0.977698	0.983561	deepvariant	ALL	*	GQ	*	0.165366	6125	6582	3031399176	2546864659	0	3363378	2277773	1085605	2049176	1309841	2.09816	1.56445	3328043	2257792	1070251	2025904	1302139	2.10959	1.55583	35335	19981	15354	23272	7702	1.30135	3.02155	4077614	2713691	1365154	2449181	1626568	1.98783	1.50574	3327413	2257515	1069917	2025403
HG00733	30	SNV	ONT	0.989494	0.977698	0.983561	deepvariant	PASS	*	GQ	*	0.165366	6125	6582	3031399176	2546864659	0	3363378	2277773	1085605	2049176	1309841	2.09816	1.56445	3328043	2257792	1070251	2025904	1302139	2.10959	1.55583	35335	19981	15354	23272	7702	1.30135	3.02155	4077614	2713691	1365154	2449181	1626568	1.98783	1.50574	3327413	2257515	1069917	2025403
HG002	5	SNV	UL-ONT	0.6167	0.923428	0.739521	deepvariant	ALL	*	GQ	*	0.123987	152713	2702	2809091522	2546949881	0	3365115	2280133	1085711	2060752	1303287	2.10013	1.5812	2075267	1410716	664660	978143	1096957	2.12246	0.891688	1289848	869417	421051	1082609	206330	2.06487	5.24698	2565527	1726390	839369	1137697	1427474	2.05677	0.797	2075344	1410748	664705	978189
HG002	5	SNV	UL-ONT	0.6167	0.923428	0.739521	deepvariant	PASS	*	GQ	*	0.123987	152713	2702	2809091522	2546949881	0	3365115	2280133	1085711	2060752	1303287	2.10013	1.5812	2075267	1410716	664660	978143	1096957	2.12246	0.891688	1289848	869417	421051	1082609	206330	2.06487	5.24698	2565527	1726390	839369	1137697	1427474	2.05677	0.797	2075344	1410748	664705	978189
HG002	8	SNV	UL-ONT	0.846926	0.970528	0.904524	deepvariant	ALL	*	GQ	*	0.127364	67176	3974	2809091522	2546949881	0	3365115	2280133	1085711	2060752	1303287	2.10013	1.5812	2850005	1932138	918249	1587092	1262346	2.10415	1.25726	515110	347995	167462	473660	40941	2.07805	11.5693	3365385	2253550	1112449	1824928	1539545	2.02576	1.18537	2850205	1932227	918360	1587251
HG002	8	SNV	UL-ONT	0.846926	0.970528	0.904524	deepvariant	PASS	*	GQ	*	0.127364	67176	3974	2809091522	2546949881	0	3365115	2280133	1085711	2060752	1303287	2.10013	1.5812	2850005	1932138	918249	1587092	1262346	2.10415	1.25726	515110	347995	167462	473660	40941	2.07805	11.5693	3365385	2253550	1112449	1824928	1539545	2.02576	1.18537	2850205	1932227	918360	1587251
HG002	10	SNV	UL-ONT	0.919595	0.984123	0.950765	deepvariant	ALL	*	GQ	*	0.131233	31641	4404	2809091522	2546949881	0	3365115	2280133	1085711	2060752	1303287	2.10013	1.5812	3094543	2097208	997875	1807114	1286635	2.10167	1.40453	270572	182925	87836	253638	16652	2.08257	15.2317	3619782	2419862	1200746	2084438	1534134	2.0153	1.35871	3094819	2097341	998018	1807363
HG002	10	SNV	UL-ONT	0.919595	0.984123	0.950765	deepvariant	PASS	*	GQ	*	0.131233	31641	4404	2809091522	2546949881	0	3365115	2280133	1085711	2060752	1303287	2.10013	1.5812	3094543	2097208	997875	1807114	1286635	2.10167	1.40453	270572	182925	87836	253638	16652	2.08257	15.2317	3619782	2419862	1200746	2084438	1534134	2.0153	1.35871	3094819	2097341	998018	1807363
HG002	12	SNV	UL-ONT	0.954985	0.991186	0.972749	deepvariant	ALL	*	GQ	*	0.133835	14159	4511	2809091522	2546949881	0	3365115	2280133	1085711	2060752	1303287	2.10013	1.5812	3213636	2177581	1036674	1918437	1294279	2.10055	1.48224	151479	102552	49037	142315	9008	2.09132	15.7987	3743585	2499775	1244774	2208660	1533461	2.00822	1.44031	3213983	2177742	1036860	1918764
HG002	12	SNV	UL-ONT	0.954985	0.991186	0.972749	deepvariant	PASS	*	GQ	*	0.133835	14159	4511	2809091522	2546949881	0	3365115	2280133	1085711	2060752	1303287	2.10013	1.5812	3213636	2177581	1036674	1918437	1294279	2.10055	1.48224	151479	102552	49037	142315	9008	2.09132	15.7987	3743585	2499775	1244774	2208660	1533461	2.00822	1.44031	3213983	2177742	1036860	1918764
HG002	15	SNV	UL-ONT	0.977923	0.994602	0.986192	deepvariant	ALL	*	GQ	*	0.13683	5106	4536	2809091522	2546949881	0	3365115	2280133	1085711	2060752	1303287	2.10013	1.5812	3290822	2230325	1061157	1991394	1298444	2.10179	1.53368	74293	49808	24554	69358	4843	2.02851	14.3213	3833625	2557758	1276919	2295728	1536332	2.00307	1.49429	3291209	2230508	1061361	1991758
HG002	15	SNV	UL-ONT	0.977923	0.994602	0.986192	deepvariant	PASS	*	GQ	*	0.13683	5106	4536	2809091522	2546949881	0	3365115	2280133	1085711	2060752	1303287	2.10013	1.5812	3290822	2230325	1061157	1991394	1298444	2.10179	1.53368	74293	49808	24554	69358	4843	2.02851	14.3213	3833625	2557758	1276919	2295728	1536332	2.00307	1.49429	3291209	2230508	1061361	1991758
HG002	17	SNV	UL-ONT	0.98549	0.995662	0.99055	deepvariant	ALL	*	GQ	*	0.139454	2947	4362	2809091522	2546949881	0	3365115	2280133	1085711	2060752	1303287	2.10013	1.5812	3316287	2248039	1068936	2015784	1299490	2.10306	1.55121	48828	32094	16775	44968	3797	1.9132	11.843	3871035	2581261	1290859	2328761	1540651	1.99965	1.51154	3316755	2248260	1069183	2016223
HG002	17	SNV	UL-ONT	0.98549	0.995662	0.99055	deepvariant	PASS	*	GQ	*	0.139454	2947	4362	2809091522	2546949881	0	3365115	2280133	1085711	2060752	1303287	2.10013	1.5812	3316287	2248039	1068936	2015784	1299490	2.10306	1.55121	48828	32094	16775	44968	3797	1.9132	11.843	3871035	2581261	1290859	2328761	1540651	1.99965	1.51154	3316755	2248260	1069183	2016223
HG002	20	SNV	UL-ONT	0.991039	0.996149	0.993587	deepvariant	ALL	*	GQ	*	0.141696	1670	4179	2809091522	2546949881	0	3365115	2280133	1085711	2060752	1303287	2.10013	1.5812	3334960	2260871	1074782	2033372	1300561	2.10356	1.56346	30155	19262	10929	27380	2726	1.76247	10.044	3901100	2599682	1302508	2351169	1548279	1.9959	1.51857	3335434	2261099	1075028	2033824
HG002	20	SNV	UL-ONT	0.991039	0.996149	0.993587	deepvariant	PASS	*	GQ	*	0.141696	1670	4179	2809091522	2546949881	0	3365115	2280133	1085711	2060752	1303287	2.10013	1.5812	3334960	2260871	1074782	2033372	1300561	2.10356	1.56346	30155	19262	10929	27380	2726	1.76247	10.044	3901100	2599682	1302508	2351169	1548279	1.9959	1.51857	3335434	2261099	1075028	2033824
HG002	25	SNV	UL-ONT	0.994903	0.996496	0.995699	deepvariant	ALL	*	GQ	*	0.145435	1071	3822	2809091522	2546949881	0	3365115	2280133	1085711	2060752	1303287	2.10013	1.5812	3347962	2269697	1078966	2045665	1301254	2.10359	1.57207	17153	10436	6745	15087	2033	1.54722	7.42105	3932148	2616822	1316457	2372358	1558059	1.98778	1.52264	3348503	2269955	1079249	2046185
HG002	25	SNV	UL-ONT	0.994903	0.996496	0.995699	deepvariant	PASS	*	GQ	*	0.145435	1071	3822	2809091522	2546949881	0	3365115	2280133	1085711	2060752	1303287	2.10013	1.5812	3347962	2269697	1078966	2045665	1301254	2.10359	1.57207	17153	10436	6745	15087	2033	1.54722	7.42105	3932148	2616822	1316457	2372358	1558059	1.98778	1.52264	3348503	2269955	1079249	2046185
HG002	30	SNV	UL-ONT	0.996467	0.997119	0.996793	deepvariant	ALL	*	GQ	*	0.147917	805	3393	2809091522	2546949881	0	3365115	2280133	1085711	2060752	1303287	2.10013	1.5812	3353225	2273273	1080661	2050457	1301718	2.10359	1.57519	11890	6860	5050	10295	1569	1.35842	6.5615	3947395	2624958	1323613	2380807	1564818	1.98318	1.52146	3353818	2273555	1080972	2051031
HG002	30	SNV	UL-ONT	0.996467	0.997119	0.996793	deepvariant	PASS	*	GQ	*	0.147917	805	3393	2809091522	2546949881	0	3365115	2280133	1085711	2060752	1303287	2.10013	1.5812	3353225	2273273	1080661	2050457	1301718	2.10359	1.57519	11890	6860	5050	10295	1569	1.35842	6.5615	3947395	2624958	1323613	2380807	1564818	1.98318	1.52146	3353818	2273555	1080972	2051031
HG00733	5	SNV	UL-ONT	0.618999	0.905925	0.735468	deepvariant	ALL	*	GQ	*	0.146784	152152	3709	3031399176	2546864659	0	3362114	2276892	1085222	2049176	1309841	2.09809	1.56445	2081145	1412408	668737	986315	1094830	2.11205	0.900884	1280969	864484	416485	1062861	215011	2.07567	4.94329	2692364	1808915	883717	1205273	1486713	2.04694	0.810696	2081061	1412363	668699	986280
HG00733	5	SNV	UL-ONT	0.618999	0.905925	0.735468	deepvariant	PASS	*	GQ	*	0.146784	152152	3709	3031399176	2546864659	0	3362114	2276892	1085222	2049176	1309841	2.09809	1.56445	2081145	1412408	668737	986315	1094830	2.11205	0.900884	1280969	864484	416485	1062861	215011	2.07567	4.94329	2692364	1808915	883717	1205273	1486713	2.04694	0.810696	2081061	1412363	668699	986280
HG00733	8	SNV	UL-ONT	0.848903	0.95252	0.897732	deepvariant	ALL	*	GQ	*	0.148864	68543	5746	3031399176	2546864659	0	3362884	2277421	1085463	2049176	1309841	2.09811	1.56445	2854763	1934621	920142	1590157	1264606	2.10252	1.25743	508121	342800	165321	459019	45235	2.07354	10.1474	3520906	2356315	1165209	1917330	1602664	2.02223	1.19634	2854483	1934492	919998	1589971
HG00733	8	SNV	UL-ONT	0.848903	0.95252	0.897732	deepvariant	PASS	*	GQ	*	0.148864	68543	5746	3031399176	2546864659	0	3362884	2277421	1085463	2049176	1309841	2.09811	1.56445	2854763	1934621	920142	1590157	1264606	2.10252	1.25743	508121	342800	165321	459019	45235	2.07354	10.1474	3520906	2356315	1165209	1917330	1602664	2.02223	1.19634	2854483	1934492	919998	1589971
HG00733	10	SNV	UL-ONT	0.914963	0.964814	0.939227	deepvariant	ALL	*	GQ	*	0.152824	36111	6638	3031399176	2546864659	0	3363084	2277568	1085516	2049176	1309841	2.09814	1.56445	3077097	2085077	992020	1789543	1287554	2.10185	1.38988	285987	192491	93496	259633	22287	2.05882	11.6495	3764115	2515604	1249269	2157289	1605648	2.01366	1.34356	3076665	2084920	991758	1789224
HG00733	10	SNV	UL-ONT	0.914963	0.964814	0.939227	deepvariant	PASS	*	GQ	*	0.152824	36111	6638	3031399176	2546864659	0	3363084	2277568	1085516	2049176	1309841	2.09814	1.56445	3077097	2085077	992020	1789543	1287554	2.10185	1.38988	285987	192491	93496	259633	22287	2.05882	11.6495	3764115	2515604	1249269	2157289	1605648	2.01366	1.34356	3076665	2084920	991758	1789224
HG00733	12	SNV	UL-ONT	0.948983	0.970866	0.9598	deepvariant	ALL	*	GQ	*	0.154393	19203	7213	3031399176	2546864659	0	3363201	2277631	1085570	2049176	1309841	2.0981	1.56445	3191621	2163111	1028510	1896484	1295137	2.10315	1.46431	171580	114520	57060	152692	14704	2.00701	10.3844	3887032	2596377	1291526	2284598	1601116	2.01032	1.42688	3191138	2162911	1028238	1896133
HG00733	12	SNV	UL-ONT	0.948983	0.970866	0.9598	deepvariant	PASS	*	GQ	*	0.154393	19203	7213	3031399176	2546864659	0	3363201	2277631	1085570	2049176	1309841	2.0981	1.56445	3191621	2163111	1028510	1896484	1295137	2.10315	1.46431	171580	114520	57060	152692	14704	2.00701	10.3844	3887032	2596377	1291526	2284598	1601116	2.01032	1.42688	3191138	2162911	1028238	1896133
HG00733	15	SNV	UL-ONT	0.972326	0.974043	0.973184	deepvariant	ALL	*	GQ	*	0.160621	10180	7435	3031399176	2546864659	0	3363345	2277733	1085612	2049176	1309841	2.09811	1.56445	3270268	2217412	1052856	1970976	1299292	2.10609	1.51696	93077	60321	32756	78200	10549	1.84153	7.41302	3999248	2665622	1334624	2386523	1611199	1.99728	1.48121	3269751	2217194	1052576	1970587
HG00733	15	SNV	UL-ONT	0.972326	0.974043	0.973184	deepvariant	PASS	*	GQ	*	0.160621	10180	7435	3031399176	2546864659	0	3363345	2277733	1085612	2049176	1309841	2.09811	1.56445	3270268	2217412	1052856	1970976	1299292	2.10609	1.51696	93077	60321	32756	78200	10549	1.84153	7.41302	3999248	2665622	1334624	2386523	1611199	1.99728	1.48121	3269751	2217194	1052576	1970587
HG00733	17	SNV	UL-ONT	0.979253	0.974198	0.976719	deepvariant	ALL	*	GQ	*	0.163024	8429	7533	3031399176	2546864659	0	3363337	2277742	1085595	2049176	1309841	2.09815	1.56445	3293558	2233623	1059935	1993277	1300281	2.10732	1.53296	69779	44119	25660	55899	9560	1.71937	5.84718	4038618	2690222	1349446	2417322	1619717	1.99358	1.49243	3293011	2233394	1059635	1992845
HG00733	17	SNV	UL-ONT	0.979253	0.974198	0.976719	deepvariant	PASS	*	GQ	*	0.163024	8429	7533	3031399176	2546864659	0	3363337	2277742	1085595	2049176	1309841	2.09815	1.56445	3293558	2233623	1059935	1993277	1300281	2.10732	1.53296	69779	44119	25660	55899	9560	1.71937	5.84718	4038618	2690222	1349446	2417322	1619717	1.99358	1.49243	3293011	2233394	1059635	1992845
HG00733	20	SNV	UL-ONT	0.984569	0.974987	0.979755	deepvariant	ALL	*	GQ	*	0.164846	7058	7457	3031399176	2546864659	0	3363373	2277761	1085612	2049176	1309841	2.09814	1.56445	3311473	2245911	1065562	2010187	1301286	2.10772	1.54477	51900	31850	20050	38989	8555	1.58853	4.55745	4066086	2707305	1359908	2443834	1620531	1.9908	1.50805	3310869	2245655	1065233	2009711
HG00733	20	SNV	UL-ONT	0.984569	0.974987	0.979755	deepvariant	PASS	*	GQ	*	0.164846	7058	7457	3031399176	2546864659	0	3363373	2277761	1085612	2049176	1309841	2.09814	1.56445	3311473	2245911	1065562	2010187	1301286	2.10772	1.54477	51900	31850	20050	38989	8555	1.58853	4.55745	4066086	2707305	1359908	2443834	1620531	1.9908	1.50805	3310869	2245655	1065233	2009711
HG00733	25	SNV	UL-ONT	0.988138	0.975337	0.981696	deepvariant	ALL	*	GQ	*	0.16917	6368	7217	3031399176	2546864659	0	3363373	2277767	1085606	2049176	1309841	2.09815	1.56445	3323475	2254387	1069088	2021586	1301889	2.1087	1.55281	39898	23380	16518	27590	7952	1.41543	3.46957	4100603	2726382	1375314	2460507	1638412	1.98237	1.50176	3322879	2254126	1068775	2021115
HG00733	25	SNV	UL-ONT	0.988138	0.975337	0.981696	deepvariant	PASS	*	GQ	*	0.16917	6368	7217	3031399176	2546864659	0	3363373	2277767	1085606	2049176	1309841	2.09815	1.56445	3323475	2254387	1069088	2021586	1301889	2.1087	1.55281	39898	23380	16518	27590	7952	1.41543	3.46957	4100603	2726382	1375314	2460507	1638412	1.98237	1.50176	3322879	2254126	1068775	2021115
HG00733	30	SNV	UL-ONT	0.989562	0.975633	0.982548	deepvariant	ALL	*	GQ	*	0.172532	6181	7045	3031399176	2546864659	0	3363397	2277782	1085615	2049176	1309841	2.09815	1.56445	3328291	2257745	1070546	2026166	1302125	2.10897	1.55605	35106	20037	15069	23010	7716	1.32968	2.98212	4121923	2737426	1385602	2471303	1648899	1.97562	1.49876	3327649	2257476	1070194	2025656
HG00733	30	SNV	UL-ONT	0.989562	0.975633	0.982548	deepvariant	PASS	*	GQ	*	0.172532	6181	7045	3031399176	2546864659	0	3363397	2277782	1085615	2049176	1309841	2.09815	1.56445	3328291	2257745	1070546	2026166	1302125	2.10897	1.55605	35106	20037	15069	23010	7716	1.32968	2.98212	4121923	2737426	1385602	2471303	1648899	1.97562	1.49876	3327649	2257476	1070194	2025656
[truncated: 17 more columns]
