# Supplementary material for: Whole-genome long-read sequencing downsampling and its effect on variant-calling precision and recall
Source: Genome Res. 2023 Dec;33(12):2029–40. doi: 10.1101/gr.278070.123 (PMC10760522; doi:10.1101/gr.278070.123)
Supplement: Supplement 5 [file Supplemental_Table_S3.xlsx]

## Sheet: S3
S3 - SNVs not in GIAB
#CHROM	POS	END	SVTYPE	REF	ALT	ID	CALLER
chr1	13094100	13094100	SNV	C	T	chr1-13094100-SNV-C-T	reads
chr1	16953279	16953279	SNV	G	C	chr1-16953279-SNV-G-C	reads
chr1	16953282	16953282	SNV	A	G	chr1-16953282-SNV-A-G	reads
chr1	16953657	16953657	SNV	T	C	chr1-16953657-SNV-T-C	reads
chr1	16953826	16953826	SNV	G	C	chr1-16953826-SNV-G-C	reads
chr1	16954251	16954251	SNV	C	T	chr1-16954251-SNV-C-T	reads
chr1	19348770	19348770	SNV	C	G	chr1-19348770-SNV-C-G	reads
chr1	62458535	62458535	SNV	G	T	chr1-62458535-SNV-G-T	reads
chr1	68401996	68401996	SNV	G	A	chr1-68401996-SNV-G-A	reads
chr1	97384260	97384260	SNV	A	C	chr1-97384260-SNV-A-C	both
chr1	146315543	146315543	SNV	T	C	chr1-146315543-SNV-T-C	reads
chr1	149359896	149359896	SNV	G	A	chr1-149359896-SNV-G-A	reads
chr1	196760848	196760848	SNV	G	A	chr1-196760848-SNV-G-A	reads
chr1	196760973	196760973	SNV	T	C	chr1-196760973-SNV-T-C	reads
chr1	196761010	196761010	SNV	C	T	chr1-196761010-SNV-C-T	reads
chr1	196761044	196761044	SNV	T	A	chr1-196761044-SNV-T-A	reads
chr1	196761133	196761133	SNV	A	G	chr1-196761133-SNV-A-G	reads
chr1	196761270	196761270	SNV	T	A	chr1-196761270-SNV-T-A	reads
chr1	196761496	196761496	SNV	G	A	chr1-196761496-SNV-G-A	reads
chr1	196761502	196761502	SNV	A	T	chr1-196761502-SNV-A-T	reads
chr1	196761523	196761523	SNV	T	A	chr1-196761523-SNV-T-A	reads
chr1	196761587	196761587	SNV	C	T	chr1-196761587-SNV-C-T	reads
chr1	196761828	196761828	SNV	A	G	chr1-196761828-SNV-A-G	reads
chr1	196761904	196761904	SNV	T	C	chr1-196761904-SNV-T-C	reads
chr1	196762181	196762181	SNV	C	T	chr1-196762181-SNV-C-T	reads
chr1	196762194	196762194	SNV	A	T	chr1-196762194-SNV-A-T	reads
chr1	196762199	196762199	SNV	C	T	chr1-196762199-SNV-C-T	reads
chr1	196762210	196762210	SNV	A	C	chr1-196762210-SNV-A-C	reads
chr1	196762941	196762941	SNV	G	A	chr1-196762941-SNV-G-A	reads
chr1	196762950	196762950	SNV	C	G	chr1-196762950-SNV-C-G	reads
chr1	196762987	196762987	SNV	A	G	chr1-196762987-SNV-A-G	reads
chr1	196763227	196763227	SNV	T	G	chr1-196763227-SNV-T-G	reads
chr1	235255287	235255287	SNV	C	A	chr1-235255287-SNV-C-A	reads
chr1	236250613	236250613	SNV	A	G	chr1-236250613-SNV-A-G	reads
chr1	248490121	248490121	SNV	A	G	chr1-248490121-SNV-A-G	reads
chr10	37105034	37105034	SNV	T	C	chr10-37105034-SNV-T-C	reads
chr10	42158448	42158448	SNV	A	T	chr10-42158448-SNV-A-T	reads
chr10	42158504	42158504	SNV	A	C	chr10-42158504-SNV-A-C	reads
chr10	42159004	42159004	SNV	T	A	chr10-42159004-SNV-T-A	reads
chr10	42159117	42159117	SNV	G	T	chr10-42159117-SNV-G-T	reads
chr10	42159248	42159248	SNV	A	G	chr10-42159248-SNV-A-G	reads
chr10	42159280	42159280	SNV	A	G	chr10-42159280-SNV-A-G	reads
chr10	42159654	42159654	SNV	C	A	chr10-42159654-SNV-C-A	reads
chr10	42159851	42159851	SNV	C	T	chr10-42159851-SNV-C-T	reads
chr10	42159934	42159934	SNV	A	T	chr10-42159934-SNV-A-T	reads
chr10	42160315	42160315	SNV	A	C	chr10-42160315-SNV-A-C	reads
chr10	42160402	42160402	SNV	A	T	chr10-42160402-SNV-A-T	reads
chr10	42160747	42160747	SNV	A	T	chr10-42160747-SNV-A-T	reads
chr10	42161021	42161021	SNV	A	T	chr10-42161021-SNV-A-T	reads
chr10	42161582	42161582	SNV	A	T	chr10-42161582-SNV-A-T	reads
chr10	42161768	42161768	SNV	G	A	chr10-42161768-SNV-G-A	reads
chr10	42161910	42161910	SNV	A	G	chr10-42161910-SNV-A-G	reads
chr10	42161949	42161949	SNV	T	A	chr10-42161949-SNV-T-A	reads
chr10	42161985	42161985	SNV	G	T	chr10-42161985-SNV-G-T	reads
chr10	42162727	42162727	SNV	A	C	chr10-42162727-SNV-A-C	reads
chr10	42183771	42183771	SNV	T	A	chr10-42183771-SNV-T-A	reads
chr10	42272689	42272689	SNV	T	A	chr10-42272689-SNV-T-A	reads
chr10	46890777	46890777	SNV	G	A	chr10-46890777-SNV-G-A	reads
chr10	46891027	46891027	SNV	A	G	chr10-46891027-SNV-A-G	reads
chr10	113086773	113086773	SNV	A	G	chr10-113086773-SNV-A-G	reads
chr11	61219749	61219749	SNV	C	G	chr11-61219749-SNV-C-G	reads
chr11	62226022	62226022	SNV	A	G	chr11-62226022-SNV-A-G	reads
chr11	80756736	80756736	SNV	G	C	chr11-80756736-SNV-G-C	reads
chr11	89833543	89833543	SNV	C	T	chr11-89833543-SNV-C-T	both
chr11	89951568	89951568	SNV	C	T	chr11-89951568-SNV-C-T	reads
chr11	89951701	89951701	SNV	T	A	chr11-89951701-SNV-T-A	reads
chr11	90646122	90646122	SNV	T	A	chr11-90646122-SNV-T-A	both
chr12	97706694	97706694	SNV	C	A	chr12-97706694-SNV-C-A	both
chr12	129636737	129636737	SNV	T	A	chr12-129636737-SNV-T-A	both
chr13	26834099	26834099	SNV	A	G	chr13-26834099-SNV-A-G	reads
chr13	70250846	70250846	SNV	T	C	chr13-70250846-SNV-T-C	reads
chr14	18959486	18959486	SNV	A	G	chr14-18959486-SNV-A-G	reads
chr14	18960127	18960127	SNV	C	T	chr14-18960127-SNV-C-T	reads
chr14	18961714	18961714	SNV	T	C	chr14-18961714-SNV-T-C	reads
chr14	18961740	18961740	SNV	T	C	chr14-18961740-SNV-T-C	reads
chr15	20083863	20083863	SNV	C	T	chr15-20083863-SNV-C-T	reads
chr15	20626348	20626348	SNV	C	T	chr15-20626348-SNV-C-T	reads
chr15	20627303	20627303	SNV	G	C	chr15-20627303-SNV-G-C	reads
chr15	20627533	20627533	SNV	G	A	chr15-20627533-SNV-G-A	reads
chr15	20627744	20627744	SNV	A	C	chr15-20627744-SNV-A-C	reads
chr15	20627887	20627887	SNV	C	T	chr15-20627887-SNV-C-T	reads
chr15	20627897	20627897	SNV	C	T	chr15-20627897-SNV-C-T	reads
chr15	20628081	20628081	SNV	C	T	chr15-20628081-SNV-C-T	reads
chr15	20629112	20629112	SNV	G	A	chr15-20629112-SNV-G-A	reads
chr15	20629313	20629313	SNV	G	A	chr15-20629313-SNV-G-A	reads
chr15	30401206	30401206	SNV	A	G	chr15-30401206-SNV-A-G	reads
chr15	30415048	30415048	SNV	G	A	chr15-30415048-SNV-G-A	reads
chr15	82348679	82348679	SNV	T	C	chr15-82348679-SNV-T-C	reads
chr16	14732509	14732509	SNV	G	A	chr16-14732509-SNV-G-A	reads
chr16	16291938	16291938	SNV	G	C	chr16-16291938-SNV-G-C	reads
chr16	16371324	16371324	SNV	G	C	chr16-16371324-SNV-G-C	reads
chr16	16371538	16371538	SNV	T	C	chr16-16371538-SNV-T-C	reads
chr16	16371611	16371611	SNV	A	G	chr16-16371611-SNV-A-G	reads
chr16	16372117	16372117	SNV	T	C	chr16-16372117-SNV-T-C	reads
chr16	16373641	16373641	SNV	C	T	chr16-16373641-SNV-C-T	reads
chr16	16374400	16374400	SNV	T	C	chr16-16374400-SNV-T-C	reads
chr16	16619570	16619570	SNV	G	A	chr16-16619570-SNV-G-A	both
chr16	16619585	16619585	SNV	G	A	chr16-16619585-SNV-G-A	both
chr16	16619587	16619587	SNV	G	C	chr16-16619587-SNV-G-C	both
chr16	16619590	16619590	SNV	A	G	chr16-16619590-SNV-A-G	both
chr16	16619597	16619597	SNV	T	C	chr16-16619597-SNV-T-C	both
chr16	16705116	16705116	SNV	G	A	chr16-16705116-SNV-G-A	reads
chr16	16705151	16705151	SNV	G	A	chr16-16705151-SNV-G-A	reads
chr16	16705243	16705243	SNV	C	G	chr16-16705243-SNV-C-G	both
chr16	18222763	18222763	SNV	A	T	chr16-18222763-SNV-A-T	reads
chr16	18241356	18241356	SNV	A	G	chr16-18241356-SNV-A-G	reads
chr16	18242570	18242570	SNV	G	C	chr16-18242570-SNV-G-C	reads
chr16	18242899	18242899	SNV	G	A	chr16-18242899-SNV-G-A	reads
chr16	18349634	18349634	SNV	C	G	chr16-18349634-SNV-C-G	reads
chr16	18350024	18350024	SNV	G	A	chr16-18350024-SNV-G-A	reads
chr16	18352977	18352977	SNV	C	G	chr16-18352977-SNV-C-G	reads
chr16	18353883	18353883	SNV	C	G	chr16-18353883-SNV-C-G	reads
chr16	18354042	18354042	SNV	C	T	chr16-18354042-SNV-C-T	reads
chr16	18355127	18355127	SNV	T	C	chr16-18355127-SNV-T-C	reads
chr16	18355931	18355931	SNV	G	C	chr16-18355931-SNV-G-C	reads
chr16	18361889	18361889	SNV	C	T	chr16-18361889-SNV-C-T	reads
chr16	18362175	18362175	SNV	T	A	chr16-18362175-SNV-T-A	reads
chr16	18362358	18362358	SNV	G	T	chr16-18362358-SNV-G-T	reads
chr16	18362473	18362473	SNV	C	A	chr16-18362473-SNV-C-A	reads
chr16	18363085	18363085	SNV	A	G	chr16-18363085-SNV-A-G	reads
chr16	18364550	18364550	SNV	A	G	chr16-18364550-SNV-A-G	reads
chr16	33905233	33905233	SNV	A	G	chr16-33905233-SNV-A-G	both
chr16	33905318	33905318	SNV	C	A	chr16-33905318-SNV-C-A	both
chr16	33905351	33905351	SNV	G	A	chr16-33905351-SNV-G-A	both
chr16	33905621	33905621	SNV	C	T	chr16-33905621-SNV-C-T	both
chr16	33905626	33905626	SNV	T	C	chr16-33905626-SNV-T-C	both
chr16	33905739	33905739	SNV	A	T	chr16-33905739-SNV-A-T	both
chr16	33905975	33905975	SNV	A	G	chr16-33905975-SNV-A-G	both
chr16	46980621	46980621	SNV	G	T	chr16-46980621-SNV-G-T	reads
chr16	84163873	84163873	SNV	T	G	chr16-84163873-SNV-T-G	reads
chr17	16844837	16844837	SNV	T	C	chr17-16844837-SNV-T-C	reads
chr17	18551828	18551828	SNV	G	A	chr17-18551828-SNV-G-A	reads
chr17	18554854	18554854	SNV	T	C	chr17-18554854-SNV-T-C	reads
chr17	26953167	26953167	SNV	T	A	chr17-26953167-SNV-T-A	reads
chr17	26953570	26953570	SNV	A	C	chr17-26953570-SNV-A-C	reads
chr17	26953674	26953674	SNV	T	C	chr17-26953674-SNV-T-C	reads
chr17	36383753	36383753	SNV	T	C	chr17-36383753-SNV-T-C	reads
chr17	38101173	38101173	SNV	A	G	chr17-38101173-SNV-A-G	reads
chr17	38148949	38148949	SNV	T	C	chr17-38148949-SNV-T-C	reads
chr17	45508258	45508258	SNV	G	A	chr17-45508258-SNV-G-A	reads
chr17	45508617	45508617	SNV	C	T	chr17-45508617-SNV-C-T	reads
chr17	45508738	45508738	SNV	T	C	chr17-45508738-SNV-T-C	reads
chr17	45508805	45508805	SNV	G	T	chr17-45508805-SNV-G-T	reads
chr17	45508899	45508899	SNV	T	C	chr17-45508899-SNV-T-C	reads
chr17	45509044	45509044	SNV	C	T	chr17-45509044-SNV-C-T	reads
chr17	45509069	45509069	SNV	T	C	chr17-45509069-SNV-T-C	reads
chr17	45509326	45509326	SNV	T	C	chr17-45509326-SNV-T-C	reads
chr17	45509337	45509337	SNV	T	C	chr17-45509337-SNV-T-C	reads
chr17	45509383	45509383	SNV	G	C	chr17-45509383-SNV-G-C	reads
chr17	45510131	45510131	SNV	T	G	chr17-45510131-SNV-T-G	reads
chr17	45510160	45510160	SNV	C	T	chr17-45510160-SNV-C-T	reads
chr17	45510424	45510424	SNV	C	T	chr17-45510424-SNV-C-T	reads
chr17	45510427	45510427	SNV	A	G	chr17-45510427-SNV-A-G	reads
chr17	45510547	45510547	SNV	C	T	chr17-45510547-SNV-C-T	reads
chr17	47272687	47272687	SNV	C	T	chr17-47272687-SNV-C-T	reads
chr17	49336965	49336965	SNV	T	A	chr17-49336965-SNV-T-A	both
chr17	51338685	51338685	SNV	A	T	chr17-51338685-SNV-A-T	reads
chr17	54197354	54197354	SNV	A	G	chr17-54197354-SNV-A-G	reads
chr17	71471930	71471930	SNV	T	A	chr17-71471930-SNV-T-A	reads
chr18	171025	171025	SNV	A	T	chr18-171025-SNV-A-T	both
chr18	12347553	12347553	SNV	T	C	chr18-12347553-SNV-T-C	reads
chr19	2424544	2424544	SNV	T	C	chr19-2424544-SNV-T-C	reads
chr19	39903491	39903491	SNV	C	T	chr19-39903491-SNV-C-T	both
chr19	39903658	39903658	SNV	C	G	chr19-39903658-SNV-C-G	both
chr19	39903751	39903751	SNV	G	T	chr19-39903751-SNV-G-T	both
chr19	39903760	39903760	SNV	C	T	chr19-39903760-SNV-C-T	both
chr19	39903804	39903804	SNV	C	T	chr19-39903804-SNV-C-T	both
chr19	39905857	39905857	SNV	C	T	chr19-39905857-SNV-C-T	reads
chr19	54198483	54198483	SNV	A	T	chr19-54198483-SNV-A-T	reads
chr2	814106	814106	SNV	G	C	chr2-814106-SNV-G-C	both
chr2	5099688	5099688	SNV	T	A	chr2-5099688-SNV-T-A	reads
chr2	26992548	26992548	SNV	T	A	chr2-26992548-SNV-T-A	reads
chr2	81141113	81141113	SNV	T	C	chr2-81141113-SNV-T-C	reads
chr2	207102126	207102126	SNV	T	A	chr2-207102126-SNV-T-A	reads
chr2	242160233	242160233	SNV	T	C	chr2-242160233-SNV-T-C	reads
chr2	242162081	242162081	SNV	A	G	chr2-242162081-SNV-A-G	reads
chr20	49935354	49935354	SNV	G	T	chr20-49935354-SNV-G-T	reads
chr20	58575467	58575467	SNV	A	G	chr20-58575467-SNV-A-G	reads
chr20	58575468	58575468	SNV	A	G	chr20-58575468-SNV-A-G	reads
chr21	20300396	20300396	SNV	G	A	chr21-20300396-SNV-G-A	reads
chr21	35189204	35189204	SNV	G	A	chr21-35189204-SNV-G-A	reads
chr21	46164877	46164877	SNV	A	C	chr21-46164877-SNV-A-C	both
chr22	15837787	15837787	SNV	A	C	chr22-15837787-SNV-A-C	reads
chr22	19951357	19951357	SNV	C	T	chr22-19951357-SNV-C-T	reads
chr3	21601448	21601448	SNV	G	C	chr3-21601448-SNV-G-C	both
chr3	42192416	42192416	SNV	G	A	chr3-42192416-SNV-G-A	reads
chr3	75522380	75522380	SNV	C	T	chr3-75522380-SNV-C-T	both
chr3	75522502	75522502	SNV	C	T	chr3-75522502-SNV-C-T	both
chr3	75522616	75522616	SNV	T	A	chr3-75522616-SNV-T-A	both
chr3	75522619	75522619	SNV	C	A	chr3-75522619-SNV-C-A	both
chr3	75525995	75525995	SNV	A	C	chr3-75525995-SNV-A-C	both
chr3	85515631	85515631	SNV	A	T	chr3-85515631-SNV-A-T	reads
chr3	125341999	125341999	SNV	C	G	chr3-125341999-SNV-C-G	reads
chr3	138812239	138812239	SNV	G	T	chr3-138812239-SNV-G-T	both
chr4	74563285	74563285	SNV	A	T	chr4-74563285-SNV-A-T	both
chr4	135189041	135189041	SNV	C	T	chr4-135189041-SNV-C-T	reads
chr4	186794552	186794552	SNV	A	T	chr4-186794552-SNV-A-T	both
chr4	190095733	190095733	SNV	T	C	chr4-190095733-SNV-T-C	reads
chr4	190095992	190095992	SNV	T	C	chr4-190095992-SNV-T-C	reads
chr4	190096163	190096163	SNV	C	T	chr4-190096163-SNV-C-T	reads
chr4	190097322	190097322	SNV	T	C	chr4-190097322-SNV-T-C	reads
chr4	190097528	190097528	SNV	T	C	chr4-190097528-SNV-T-C	reads
chr4	190097700	190097700	SNV	A	G	chr4-190097700-SNV-A-G	reads
chr4	190097742	190097742	SNV	T	C	chr4-190097742-SNV-T-C	reads
chr4	190098543	190098543	SNV	G	A	chr4-190098543-SNV-G-A	reads
chr5	69624494	69624494	SNV	T	C	chr5-69624494-SNV-T-C	reads
chr5	70536330	70536330	SNV	C	T	chr5-70536330-SNV-C-T	reads
chr5	70536921	70536921	SNV	T	A	chr5-70536921-SNV-T-A	reads
chr5	70625880	70625880	SNV	T	C	chr5-70625880-SNV-T-C	reads
chr5	70633600	70633600	SNV	T	A	chr5-70633600-SNV-T-A	reads
chr5	70634773	70634773	SNV	A	G	chr5-70634773-SNV-A-G	reads
chr5	70679591	70679591	SNV	G	A	chr5-70679591-SNV-G-A	reads
chr5	71272794	71272794	SNV	T	G	chr5-71272794-SNV-T-G	reads
chr5	71276259	71276259	SNV	C	G	chr5-71276259-SNV-C-G	reads
chr5	71276906	71276906	SNV	G	A	chr5-71276906-SNV-G-A	reads
chr5	71277250	71277250	SNV	T	C	chr5-71277250-SNV-T-C	reads
chr5	81323874	81323874	SNV	G	A	chr5-81323874-SNV-G-A	reads
chr5	135933998	135933998	SNV	G	T	chr5-135933998-SNV-G-T	reads
chr5	177766018	177766018	SNV	G	A	chr5-177766018-SNV-G-A	reads
chr5	177766032	177766032	SNV	G	A	chr5-177766032-SNV-G-A	reads
chr5	177766070	177766070	SNV	T	C	chr5-177766070-SNV-T-C	reads
chr5	177768849	177768849	SNV	C	G	chr5-177768849-SNV-C-G	reads
chr5	177768895	177768895	SNV	T	C	chr5-177768895-SNV-T-C	reads
chr5	178014994	178014994	SNV	G	A	chr5-178014994-SNV-G-A	both
chr5	179637253	179637253	SNV	A	G	chr5-179637253-SNV-A-G	reads
chr5	179637308	179637308	SNV	C	A	chr5-179637308-SNV-C-A	reads
chr6	6949444	6949444	SNV	A	T	chr6-6949444-SNV-A-T	reads
chr6	23197319	23197319	SNV	T	A	chr6-23197319-SNV-T-A	reads
chr6	27836914	27836914	SNV	A	G	chr6-27836914-SNV-A-G	reads
chr6	29700052	29700052	SNV	C	T	chr6-29700052-SNV-C-T	both
chr6	31202342	31202342	SNV	G	C	chr6-31202342-SNV-G-C	both
chr6	32609786	32609786	SNV	G	C	chr6-32609786-SNV-G-C	both
chr6	32612452	32612452	SNV	G	T	chr6-32612452-SNV-G-T	both
chr6	32661603	32661603	SNV	A	G	chr6-32661603-SNV-A-G	reads
chr6	32665831	32665831	SNV	C	G	chr6-32665831-SNV-C-G	reads
chr7	8053323	8053323	SNV	T	G	chr7-8053323-SNV-T-G	reads
chr7	25166233	25166233	SNV	C	T	chr7-25166233-SNV-C-T	reads
chr7	63453283	63453283	SNV	G	C	chr7-63453283-SNV-G-C	reads
chr7	63454024	63454024	SNV	C	T	chr7-63454024-SNV-C-T	reads
chr7	63457501	63457501	SNV	T	C	chr7-63457501-SNV-T-C	reads
chr7	63510499	63510499	SNV	G	C	chr7-63510499-SNV-G-C	reads
chr7	63512527	63512527	SNV	G	A	chr7-63512527-SNV-G-A	reads
chr7	63512934	63512934	SNV	A	G	chr7-63512934-SNV-A-G	reads
chr7	63582214	63582214	SNV	T	C	chr7-63582214-SNV-T-C	reads
chr7	63582478	63582478	SNV	G	A	chr7-63582478-SNV-G-A	reads
chr7	63582831	63582831	SNV	C	T	chr7-63582831-SNV-C-T	reads
chr7	76530928	76530928	SNV	G	C	chr7-76530928-SNV-G-C	both
chr7	76531257	76531257	SNV	A	G	chr7-76531257-SNV-A-G	both
chr7	76531590	76531590	SNV	T	C	chr7-76531590-SNV-T-C	both
chr7	76531692	76531692	SNV	G	A	chr7-76531692-SNV-G-A	both
chr7	76531703	76531703	SNV	C	T	chr7-76531703-SNV-C-T	both
chr7	76531803	76531803	SNV	C	A	chr7-76531803-SNV-C-A	both
chr7	76531817	76531817	SNV	C	T	chr7-76531817-SNV-C-T	both
chr7	76531915	76531915	SNV	A	G	chr7-76531915-SNV-A-G	both
chr7	76531987	76531987	SNV	G	A	chr7-76531987-SNV-G-A	both
chr7	76532035	76532035	SNV	C	G	chr7-76532035-SNV-C-G	both
chr7	76532074	76532074	SNV	A	T	chr7-76532074-SNV-A-T	both
chr7	76532083	76532083	SNV	A	G	chr7-76532083-SNV-A-G	both
chr7	76532107	76532107	SNV	A	G	chr7-76532107-SNV-A-G	both
chr7	76532118	76532118	SNV	A	G	chr7-76532118-SNV-A-G	both
chr7	76532137	76532137	SNV	C	G	chr7-76532137-SNV-C-G	both
chr7	76532469	76532469	SNV	C	T	chr7-76532469-SNV-C-T	both
chr7	76532495	76532495	SNV	C	G	chr7-76532495-SNV-C-G	both
chr7	76532510	76532510	SNV	C	A	chr7-76532510-SNV-C-A	both
chr7	76532524	76532524	SNV	A	G	chr7-76532524-SNV-A-G	both
chr7	100042338	100042338	SNV	A	G	chr7-100042338-SNV-A-G	reads
chr7	100971459	100971459	SNV	C	T	chr7-100971459-SNV-C-T	reads
chr7	100971570	100971570	SNV	C	T	chr7-100971570-SNV-C-T	reads
chr7	100971596	100971596	SNV	C	T	chr7-100971596-SNV-C-T	reads
chr7	100971636	100971636	SNV	C	T	chr7-100971636-SNV-C-T	reads
chr7	100971662	100971662	SNV	T	C	chr7-100971662-SNV-T-C	reads
chr7	100971663	100971663	SNV	G	A	chr7-100971663-SNV-G-A	reads
chr7	100971679	100971679	SNV	G	C	chr7-100971679-SNV-G-C	reads
chr7	100971680	100971680	SNV	A	G	chr7-100971680-SNV-A-G	reads
chr7	100971703	100971703	SNV	C	G	chr7-100971703-SNV-C-G	reads
chr7	100971709	100971709	SNV	A	G	chr7-100971709-SNV-A-G	reads
chr7	100971718	100971718	SNV	A	G	chr7-100971718-SNV-A-G	reads
chr7	100971779	100971779	SNV	T	C	chr7-100971779-SNV-T-C	reads
chr7	100971888	100971888	SNV	G	A	chr7-100971888-SNV-G-A	reads
chr7	100971928	100971928	SNV	T	C	chr7-100971928-SNV-T-C	reads
chr7	100972000	100972000	SNV	A	G	chr7-100972000-SNV-A-G	reads
chr7	100972030	100972030	SNV	A	G	chr7-100972030-SNV-A-G	reads
chr7	100972032	100972032	SNV	G	A	chr7-100972032-SNV-G-A	reads
chr7	100972040	100972040	SNV	G	A	chr7-100972040-SNV-G-A	reads
chr7	100972072	100972072	SNV	C	T	chr7-100972072-SNV-C-T	reads
chr7	100972078	100972078	SNV	A	G	chr7-100972078-SNV-A-G	reads
chr7	100972106	100972106	SNV	C	T	chr7-100972106-SNV-C-T	reads
chr7	100972173	100972173	SNV	G	C	chr7-100972173-SNV-G-C	reads
chr7	100972177	100972177	SNV	A	C	chr7-100972177-SNV-A-C	reads
chr7	100972179	100972179	SNV	A	G	chr7-100972179-SNV-A-G	reads
chr7	100972196	100972196	SNV	G	A	chr7-100972196-SNV-G-A	reads
chr7	100972219	100972219	SNV	A	G	chr7-100972219-SNV-A-G	reads
chr7	100972240	100972240	SNV	T	C	chr7-100972240-SNV-T-C	reads
chr7	100972244	100972244	SNV	C	T	chr7-100972244-SNV-C-T	reads
chr7	100972250	100972250	SNV	T	G	chr7-100972250-SNV-T-G	reads
chr7	100972252	100972252	SNV	C	A	chr7-100972252-SNV-C-A	reads
chr7	100972289	100972289	SNV	T	G	chr7-100972289-SNV-T-G	reads
chr7	100972299	100972299	SNV	T	G	chr7-100972299-SNV-T-G	reads
chr7	100972302	100972302	SNV	T	C	chr7-100972302-SNV-T-C	reads
chr7	100972303	100972303	SNV	G	A	chr7-100972303-SNV-G-A	reads
chr7	100972409	100972409	SNV	A	T	chr7-100972409-SNV-A-T	reads
chr7	100972422	100972422	SNV	C	A	chr7-100972422-SNV-C-A	reads
chr7	110674520	110674520	SNV	A	G	chr7-110674520-SNV-A-G	reads
chr7	122315274	122315274	SNV	G	T	chr7-122315274-SNV-G-T	both
chr7	139362640	139362640	SNV	T	A	chr7-139362640-SNV-T-A	reads
chr7	144209470	144209470	SNV	G	T	chr7-144209470-SNV-G-T	reads
chr8	2246824	2246824	SNV	C	T	chr8-2246824-SNV-C-T	reads
chr8	2328783	2328783	SNV	C	G	chr8-2328783-SNV-C-G	both
chr8	2336632	2336632	SNV	G	A	chr8-2336632-SNV-G-A	reads
chr8	2384275	2384275	SNV	A	G	chr8-2384275-SNV-A-G	reads
chr8	2392556	2392556	SNV	G	T	chr8-2392556-SNV-G-T	reads
chr8	6990915	6990915	SNV	G	T	chr8-6990915-SNV-G-T	reads
chr8	6990972	6990972	SNV	A	G	chr8-6990972-SNV-A-G	reads
chr8	12426733	12426733	SNV	T	A	chr8-12426733-SNV-T-A	reads
chr8	26165708	26165708	SNV	T	A	chr8-26165708-SNV-T-A	reads
chr9	81708	81708	SNV	C	T	chr9-81708-SNV-C-T	reads
chr9	81812	81812	SNV	A	G	chr9-81812-SNV-A-G	reads
chr9	81837	81837	SNV	G	A	chr9-81837-SNV-G-A	reads
chr9	82588	82588	SNV	A	G	chr9-82588-SNV-A-G	reads
chr9	82791	82791	SNV	C	T	chr9-82791-SNV-C-T	reads
chr9	39604980	39604980	SNV	C	A	chr9-39604980-SNV-C-A	reads
chr9	65660253	65660253	SNV	T	C	chr9-65660253-SNV-T-C	reads
chr9	67903045	67903045	SNV	T	C	chr9-67903045-SNV-T-C	reads
chr9	67903423	67903423	SNV	A	G	chr9-67903423-SNV-A-G	reads
chr1	13166007	13166007	SNV	C	T	chr1-13166007-SNV-C-T	asm
chr1	13167824	13167824	SNV	T	C	chr1-13167824-SNV-T-C	asm
chr1	13167840	13167840	SNV	A	T	chr1-13167840-SNV-A-T	asm
chr1	13168106	13168106	SNV	G	T	chr1-13168106-SNV-G-T	asm
chr1	13168605	13168605	SNV	C	T	chr1-13168605-SNV-C-T	asm
chr1	13168975	13168975	SNV	G	A	chr1-13168975-SNV-G-A	asm
chr1	13169533	13169533	SNV	T	A	chr1-13169533-SNV-T-A	asm
chr1	13170056	13170056	SNV	C	T	chr1-13170056-SNV-C-T	asm
chr1	16034396	16034396	SNV	C	A	chr1-16034396-SNV-C-A	asm
chr1	16034397	16034397	SNV	C	G	chr1-16034397-SNV-C-G	asm
chr1	16034416	16034416	SNV	A	G	chr1-16034416-SNV-A-G	asm
chr1	16034417	16034417	SNV	T	A	chr1-16034417-SNV-T-A	asm
chr1	16034419	16034419	SNV	T	C	chr1-16034419-SNV-T-C	asm
chr1	16034420	16034420	SNV	G	A	chr1-16034420-SNV-G-A	asm
chr1	16034425	16034425	SNV	G	C	chr1-16034425-SNV-G-C	asm
chr1	16034426	16034426	SNV	G	A	chr1-16034426-SNV-G-A	asm
chr1	16034427	16034427	SNV	T	G	chr1-16034427-SNV-T-G	asm
chr1	16034434	16034434	SNV	T	C	chr1-16034434-SNV-T-C	asm
chr1	16034436	16034436	SNV	C	T	chr1-16034436-SNV-C-T	asm
chr1	16034437	16034437	SNV	C	T	chr1-16034437-SNV-C-T	asm
chr1	18372866	18372866	SNV	G	A	chr1-18372866-SNV-G-A	asm
chr1	18372870	18372870	SNV	A	G	chr1-18372870-SNV-A-G	asm
chr1	108371939	108371939	SNV	A	G	chr1-108371939-SNV-A-G	asm
chr1	108372162	108372162	SNV	C	A	chr1-108372162-SNV-C-A	asm
chr1	108372579	108372579	SNV	T	A	chr1-108372579-SNV-T-A	asm
chr1	108372735	108372735	SNV	G	A	chr1-108372735-SNV-G-A	asm
chr1	108372935	108372935	SNV	T	C	chr1-108372935-SNV-T-C	asm
chr1	108377012	108377012	SNV	C	T	chr1-108377012-SNV-C-T	asm
chr1	120577430	120577430	SNV	G	T	chr1-120577430-SNV-G-T	asm
chr1	120577891	120577891	SNV	A	C	chr1-120577891-SNV-A-C	asm
chr1	120579243	120579243	SNV	C	A	chr1-120579243-SNV-C-A	asm
chr1	120579289	120579289	SNV	G	T	chr1-120579289-SNV-G-T	asm
chr1	120635435	120635435	SNV	T	C	chr1-120635435-SNV-T-C	asm
chr1	120635973	120635973	SNV	G	A	chr1-120635973-SNV-G-A	asm
chr1	120636357	120636357	SNV	G	A	chr1-120636357-SNV-G-A	asm
chr1	120636963	120636963	SNV	T	C	chr1-120636963-SNV-T-C	asm
chr1	120637445	120637445	SNV	T	C	chr1-120637445-SNV-T-C	asm
chr1	120637794	120637794	SNV	T	C	chr1-120637794-SNV-T-C	asm
chr1	120638010	120638010	SNV	A	T	chr1-120638010-SNV-A-T	asm
chr1	166255419	166255419	SNV	C	A	chr1-166255419-SNV-C-A	asm
chr1	166255438	166255438	SNV	G	T	chr1-166255438-SNV-G-T	asm
chr1	166255440	166255440	SNV	T	G	chr1-166255440-SNV-T-G	asm
chr1	203393957	203393957	SNV	T	A	chr1-203393957-SNV-T-A	asm
chr1	221096002	221096002	SNV	A	T	chr1-221096002-SNV-A-T	asm
chr1	237452077	237452077	SNV	T	G	chr1-237452077-SNV-T-G	asm
chr10	37104668	37104668	SNV	C	A	chr10-37104668-SNV-C-A	asm
chr10	37104673	37104673	SNV	A	T	chr10-37104673-SNV-A-T	asm
chr10	37104702	37104702	SNV	G	A	chr10-37104702-SNV-G-A	asm
chr10	37104706	37104706	SNV	T	G	chr10-37104706-SNV-T-G	asm
chr10	37104707	37104707	SNV	C	G	chr10-37104707-SNV-C-G	asm
chr10	37104712	37104712	SNV	G	A	chr10-37104712-SNV-G-A	asm
chr10	37104715	37104715	SNV	T	A	chr10-37104715-SNV-T-A	asm
chr10	37104733	37104733	SNV	A	T	chr10-37104733-SNV-A-T	asm
chr10	37104739	37104739	SNV	T	A	chr10-37104739-SNV-T-A	asm
chr10	37104751	37104751	SNV	G	A	chr10-37104751-SNV-G-A	asm
chr10	37104756	37104756	SNV	C	A	chr10-37104756-SNV-C-A	asm
chr10	37104765	37104765	SNV	C	A	chr10-37104765-SNV-C-A	asm
chr10	37104769	37104769	SNV	T	A	chr10-37104769-SNV-T-A	asm
chr10	37104775	37104775	SNV	G	A	chr10-37104775-SNV-G-A	asm
chr10	37104783	37104783	SNV	T	A	chr10-37104783-SNV-T-A	asm
chr10	37104785	37104785	SNV	T	A	chr10-37104785-SNV-T-A	asm
chr10	37104824	37104824	SNV	G	A	chr10-37104824-SNV-G-A	asm
chr10	37104828	37104828	SNV	G	T	chr10-37104828-SNV-G-T	asm
chr10	37104829	37104829	SNV	G	A	chr10-37104829-SNV-G-A	asm
chr10	37104832	37104832	SNV	T	C	chr10-37104832-SNV-T-C	asm
chr10	37104836	37104836	SNV	C	T	chr10-37104836-SNV-C-T	asm
chr10	37104843	37104843	SNV	A	T	chr10-37104843-SNV-A-T	asm
chr10	37104845	37104845	SNV	G	A	chr10-37104845-SNV-G-A	asm
chr10	37104849	37104849	SNV	T	A	chr10-37104849-SNV-T-A	asm
chr10	37104857	37104857	SNV	G	C	chr10-37104857-SNV-G-C	asm
chr10	37104862	37104862	SNV	C	G	chr10-37104862-SNV-C-G	asm
chr10	37104863	37104863	SNV	C	A	chr10-37104863-SNV-C-A	asm
chr10	37104866	37104866	SNV	T	G	chr10-37104866-SNV-T-G	asm
chr10	37104869	37104869	SNV	G	T	chr10-37104869-SNV-G-T	asm
chr10	37104891	37104891	SNV	T	A	chr10-37104891-SNV-T-A	asm
chr10	37104893	37104893	SNV	T	G	chr10-37104893-SNV-T-G	asm
chr10	37104901	37104901	SNV	T	A	chr10-37104901-SNV-T-A	asm
chr10	37104903	37104903	SNV	T	G	chr10-37104903-SNV-T-G	asm
chr10	37104910	37104910	SNV	A	T	chr10-37104910-SNV-A-T	asm
chr10	37104914	37104914	SNV	G	A	chr10-37104914-SNV-G-A	asm
chr10	37104915	37104915	SNV	T	G	chr10-37104915-SNV-T-G	asm
chr10	37104926	37104926	SNV	G	A	chr10-37104926-SNV-G-A	asm
chr10	37104936	37104936	SNV	A	G	chr10-37104936-SNV-A-G	asm
chr10	37104940	37104940	SNV	T	A	chr10-37104940-SNV-T-A	asm
chr10	37104942	37104942	SNV	T	A	chr10-37104942-SNV-T-A	asm
chr10	37104943	37104943	SNV	G	T	chr10-37104943-SNV-G-T	asm
chr10	37104946	37104946	SNV	C	A	chr10-37104946-SNV-C-A	asm
chr10	37104948	37104948	SNV	G	A	chr10-37104948-SNV-G-A	asm
chr10	37104950	37104950	SNV	T	G	chr10-37104950-SNV-T-G	asm
chr10	37104962	37104962	SNV	A	G	chr10-37104962-SNV-A-G	asm
chr10	37104964	37104964	SNV	G	A	chr10-37104964-SNV-G-A	asm
chr10	37104987	37104987	SNV	T	A	chr10-37104987-SNV-T-A	asm
chr10	37104992	37104992	SNV	A	G	chr10-37104992-SNV-A-G	asm
chr10	37104998	37104998	SNV	T	G	chr10-37104998-SNV-T-G	asm
chr10	37105008	37105008	SNV	G	A	chr10-37105008-SNV-G-A	asm
chr10	37105018	37105018	SNV	G	A	chr10-37105018-SNV-G-A	asm
chr10	37105022	37105022	SNV	A	T	chr10-37105022-SNV-A-T	asm
chr10	37105029	37105029	SNV	T	A	chr10-37105029-SNV-T-A	asm
chr10	37105038	37105038	SNV	G	T	chr10-37105038-SNV-G-T	asm
chr10	37105046	37105046	SNV	C	T	chr10-37105046-SNV-C-T	asm
chr10	37105054	37105054	SNV	G	C	chr10-37105054-SNV-G-C	asm
chr10	37105060	37105060	SNV	C	T	chr10-37105060-SNV-C-T	asm
chr10	37105062	37105062	SNV	T	C	chr10-37105062-SNV-T-C	asm
chr10	37105064	37105064	SNV	C	A	chr10-37105064-SNV-C-A	asm
chr10	37105072	37105072	SNV	A	G	chr10-37105072-SNV-A-G	asm
chr10	37105075	37105075	SNV	A	C	chr10-37105075-SNV-A-C	asm
chr10	37105079	37105079	SNV	G	T	chr10-37105079-SNV-G-T	asm
chr10	37105080	37105080	SNV	G	C	chr10-37105080-SNV-G-C	asm
chr10	37105101	37105101	SNV	A	T	chr10-37105101-SNV-A-T	asm
chr10	37105105	37105105	SNV	T	A	chr10-37105105-SNV-T-A	asm
chr10	37105108	37105108	SNV	T	G	chr10-37105108-SNV-T-G	asm
chr10	37105112	37105112	SNV	A	T	chr10-37105112-SNV-A-T	asm
chr10	37105118	37105118	SNV	G	T	chr10-37105118-SNV-G-T	asm
chr10	37105124	37105124	SNV	A	T	chr10-37105124-SNV-A-T	asm
chr10	37105128	37105128	SNV	G	A	chr10-37105128-SNV-G-A	asm
chr10	37105131	37105131	SNV	T	A	chr10-37105131-SNV-T-A	asm
chr10	37105146	37105146	SNV	T	A	chr10-37105146-SNV-T-A	asm
chr10	37105148	37105148	SNV	G	A	chr10-37105148-SNV-G-A	asm
chr10	37105149	37105149	SNV	A	G	chr10-37105149-SNV-A-G	asm
chr10	37105151	37105151	SNV	A	T	chr10-37105151-SNV-A-T	asm
chr10	37105156	37105156	SNV	G	T	chr10-37105156-SNV-G-T	asm
chr10	37105161	37105161	SNV	A	G	chr10-37105161-SNV-A-G	asm
chr10	37105164	37105164	SNV	T	A	chr10-37105164-SNV-T-A	asm
chr10	37105166	37105166	SNV	T	G	chr10-37105166-SNV-T-G	asm
chr10	37105169	37105169	SNV	C	A	chr10-37105169-SNV-C-A	asm
chr10	37105170	37105170	SNV	A	G	chr10-37105170-SNV-A-G	asm
chr10	37105184	37105184	SNV	A	C	chr10-37105184-SNV-A-C	asm
chr10	37105187	37105187	SNV	T	A	chr10-37105187-SNV-T-A	asm
chr10	37105189	37105189	SNV	T	A	chr10-37105189-SNV-T-A	asm
chr10	37105203	37105203	SNV	C	T	chr10-37105203-SNV-C-T	asm
chr10	37105205	37105205	SNV	C	A	chr10-37105205-SNV-C-A	asm
chr10	37105214	37105214	SNV	G	T	chr10-37105214-SNV-G-T	asm
chr10	37105217	37105217	SNV	A	C	chr10-37105217-SNV-A-C	asm
chr10	37105219	37105219	SNV	A	C	chr10-37105219-SNV-A-C	asm
chr10	37105222	37105222	SNV	T	A	chr10-37105222-SNV-T-A	asm
chr10	37105231	37105231	SNV	T	C	chr10-37105231-SNV-T-C	asm
chr10	37105232	37105232	SNV	T	A	chr10-37105232-SNV-T-A	asm
chr10	37105239	37105239	SNV	C	A	chr10-37105239-SNV-C-A	asm
chr10	37105249	37105249	SNV	A	C	chr10-37105249-SNV-A-C	asm
chr10	37105258	37105258	SNV	T	C	chr10-37105258-SNV-T-C	asm
chr10	37105262	37105262	SNV	C	T	chr10-37105262-SNV-C-T	asm
chr10	37105267	37105267	SNV	G	C	chr10-37105267-SNV-G-C	asm
chr10	37105269	37105269	SNV	C	T	chr10-37105269-SNV-C-T	asm
chr10	37105273	37105273	SNV	G	A	chr10-37105273-SNV-G-A	asm
chr10	37105274	37105274	SNV	G	T	chr10-37105274-SNV-G-T	asm
chr10	37105275	37105275	SNV	G	A	chr10-37105275-SNV-G-A	asm
chr10	37105281	37105281	SNV	A	T	chr10-37105281-SNV-A-T	asm
chr10	37105282	37105282	SNV	A	G	chr10-37105282-SNV-A-G	asm
chr10	37105283	37105283	SNV	T	A	chr10-37105283-SNV-T-A	asm
chr10	37105284	37105284	SNV	T	A	chr10-37105284-SNV-T-A	asm
chr10	37105285	37105285	SNV	G	C	chr10-37105285-SNV-G-C	asm
chr10	37105290	37105290	SNV	T	C	chr10-37105290-SNV-T-C	asm
chr10	37105301	37105301	SNV	A	T	chr10-37105301-SNV-A-T	asm
chr10	37105307	37105307	SNV	A	T	chr10-37105307-SNV-A-T	asm
chr10	37105310	37105310	SNV	A	T	chr10-37105310-SNV-A-T	asm
chr10	37105312	37105312	SNV	C	A	chr10-37105312-SNV-C-A	asm
chr10	37105316	37105316	SNV	T	A	chr10-37105316-SNV-T-A	asm
chr10	37105321	37105321	SNV	A	T	chr10-37105321-SNV-A-T	asm
chr10	37105325	37105325	SNV	T	A	chr10-37105325-SNV-T-A	asm
chr10	37105329	37105329	SNV	T	G	chr10-37105329-SNV-T-G	asm
chr10	37105330	37105330	SNV	G	C	chr10-37105330-SNV-G-C	asm
chr10	37105331	37105331	SNV	G	C	chr10-37105331-SNV-G-C	asm
chr10	37105333	37105333	SNV	G	C	chr10-37105333-SNV-G-C	asm
chr10	37105344	37105344	SNV	T	C	chr10-37105344-SNV-T-C	asm
chr10	37105347	37105347	SNV	A	T	chr10-37105347-SNV-A-T	asm
chr10	37105348	37105348	SNV	A	T	chr10-37105348-SNV-A-T	asm
chr10	37105350	37105350	SNV	C	G	chr10-37105350-SNV-C-G	asm
chr10	37105360	37105360	SNV	T	C	chr10-37105360-SNV-T-C	asm
chr10	37105363	37105363	SNV	A	G	chr10-37105363-SNV-A-G	asm
chr10	37105367	37105367	SNV	C	T	chr10-37105367-SNV-C-T	asm
chr10	37105370	37105370	SNV	C	G	chr10-37105370-SNV-C-G	asm
chr10	37105372	37105372	SNV	G	C	chr10-37105372-SNV-G-C	asm
chr10	37105395	37105395	SNV	C	T	chr10-37105395-SNV-C-T	asm
chr10	37105400	37105400	SNV	T	A	chr10-37105400-SNV-T-A	asm
chr10	37105408	37105408	SNV	G	T	chr10-37105408-SNV-G-T	asm
chr10	37105409	37105409	SNV	A	C	chr10-37105409-SNV-A-C	asm
chr10	37105410	37105410	SNV	G	T	chr10-37105410-SNV-G-T	asm
chr10	37105417	37105417	SNV	C	T	chr10-37105417-SNV-C-T	asm
chr10	37105420	37105420	SNV	A	C	chr10-37105420-SNV-A-C	asm
chr10	37105424	37105424	SNV	G	A	chr10-37105424-SNV-G-A	asm
chr10	37105432	37105432	SNV	C	T	chr10-37105432-SNV-C-T	asm
chr10	37105433	37105433	SNV	A	T	chr10-37105433-SNV-A-T	asm
chr10	37105443	37105443	SNV	C	A	chr10-37105443-SNV-C-A	asm
chr10	37105444	37105444	SNV	A	T	chr10-37105444-SNV-A-T	asm
chr10	37105445	37105445	SNV	A	C	chr10-37105445-SNV-A-C	asm
chr10	37105448	37105448	SNV	T	A	chr10-37105448-SNV-T-A	asm
chr10	37105450	37105450	SNV	A	C	chr10-37105450-SNV-A-C	asm
chr10	37105455	37105455	SNV	A	C	chr10-37105455-SNV-A-C	asm
chr10	37105462	37105462	SNV	A	T	chr10-37105462-SNV-A-T	asm
chr10	37105486	37105486	SNV	A	C	chr10-37105486-SNV-A-C	asm
chr10	37105490	37105490	SNV	G	T	chr10-37105490-SNV-G-T	asm
chr10	37105509	37105509	SNV	T	A	chr10-37105509-SNV-T-A	asm
chr10	37105517	37105517	SNV	C	T	chr10-37105517-SNV-C-T	asm
chr10	37105520	37105520	SNV	T	A	chr10-37105520-SNV-T-A	asm
chr10	37105524	37105524	SNV	T	C	chr10-37105524-SNV-T-C	asm
chr10	37105532	37105532	SNV	T	A	chr10-37105532-SNV-T-A	asm
chr10	37105538	37105538	SNV	T	G	chr10-37105538-SNV-T-G	asm
chr10	37105541	37105541	SNV	T	A	chr10-37105541-SNV-T-A	asm
chr10	37105544	37105544	SNV	A	T	chr10-37105544-SNV-A-T	asm
chr10	37105553	37105553	SNV	A	T	chr10-37105553-SNV-A-T	asm
chr10	37105565	37105565	SNV	T	C	chr10-37105565-SNV-T-C	asm
chr10	37105586	37105586	SNV	C	T	chr10-37105586-SNV-C-T	asm
chr10	37105590	37105590	SNV	A	C	chr10-37105590-SNV-A-C	asm
chr10	37105595	37105595	SNV	C	T	chr10-37105595-SNV-C-T	asm
chr10	37105599	37105599	SNV	A	G	chr10-37105599-SNV-A-G	asm
chr10	37105601	37105601	SNV	G	C	chr10-37105601-SNV-G-C	asm
chr10	37105606	37105606	SNV	A	C	chr10-37105606-SNV-A-C	asm
chr10	37105625	37105625	SNV	T	G	chr10-37105625-SNV-T-G	asm
chr10	37105632	37105632	SNV	T	A	chr10-37105632-SNV-T-A	asm
chr10	37105636	37105636	SNV	C	T	chr10-37105636-SNV-C-T	asm
chr10	37105638	37105638	SNV	T	C	chr10-37105638-SNV-T-C	asm
chr10	37105647	37105647	SNV	T	C	chr10-37105647-SNV-T-C	asm
chr10	37105650	37105650	SNV	C	A	chr10-37105650-SNV-C-A	asm
chr10	37105661	37105661	SNV	T	C	chr10-37105661-SNV-T-C	asm
chr10	37105666	37105666	SNV	C	G	chr10-37105666-SNV-C-G	asm
chr10	37105669	37105669	SNV	A	T	chr10-37105669-SNV-A-T	asm
chr10	37105672	37105672	SNV	C	A	chr10-37105672-SNV-C-A	asm
chr10	37105675	37105675	SNV	T	A	chr10-37105675-SNV-T-A	asm
chr10	37105679	37105679	SNV	G	C	chr10-37105679-SNV-G-C	asm
chr10	37105680	37105680	SNV	C	T	chr10-37105680-SNV-C-T	asm
chr10	37105691	37105691	SNV	C	A	chr10-37105691-SNV-C-A	asm
chr10	37105694	37105694	SNV	C	T	chr10-37105694-SNV-C-T	asm
chr10	37105698	37105698	SNV	G	A	chr10-37105698-SNV-G-A	asm
chr10	37105719	37105719	SNV	G	T	chr10-37105719-SNV-G-T	asm
chr10	37105720	37105720	SNV	A	C	chr10-37105720-SNV-A-C	asm
chr10	37105723	37105723	SNV	T	C	chr10-37105723-SNV-T-C	asm
chr10	37105727	37105727	SNV	C	A	chr10-37105727-SNV-C-A	asm
chr10	37105733	37105733	SNV	T	C	chr10-37105733-SNV-T-C	asm
chr10	37105744	37105744	SNV	A	C	chr10-37105744-SNV-A-C	asm
chr10	37105747	37105747	SNV	T	C	chr10-37105747-SNV-T-C	asm
chr10	37105749	37105749	SNV	A	C	chr10-37105749-SNV-A-C	asm
chr10	37105754	37105754	SNV	C	T	chr10-37105754-SNV-C-T	asm
chr10	37105756	37105756	SNV	T	C	chr10-37105756-SNV-T-C	asm
chr10	37105767	37105767	SNV	G	C	chr10-37105767-SNV-G-C	asm
chr10	37105771	37105771	SNV	T	C	chr10-37105771-SNV-T-C	asm
chr10	37105775	37105775	SNV	A	T	chr10-37105775-SNV-A-T	asm
chr10	37105779	37105779	SNV	A	T	chr10-37105779-SNV-A-T	asm
chr10	37105782	37105782	SNV	A	C	chr10-37105782-SNV-A-C	asm
chr10	37105783	37105783	SNV	A	T	chr10-37105783-SNV-A-T	asm
chr10	37105785	37105785	SNV	G	C	chr10-37105785-SNV-G-C	asm
chr10	37105790	37105790	SNV	T	C	chr10-37105790-SNV-T-C	asm
chr10	37105794	37105794	SNV	C	A	chr10-37105794-SNV-C-A	asm
chr10	37105804	37105804	SNV	A	T	chr10-37105804-SNV-A-T	asm
chr10	37105812	37105812	SNV	T	C	chr10-37105812-SNV-T-C	asm
chr10	37105813	37105813	SNV	G	C	chr10-37105813-SNV-G-C	asm
chr10	37105818	37105818	SNV	T	C	chr10-37105818-SNV-T-C	asm
chr10	37105820	37105820	SNV	C	T	chr10-37105820-SNV-C-T	asm
chr10	37105822	37105822	SNV	C	T	chr10-37105822-SNV-C-T	asm
chr10	37105824	37105824	SNV	C	T	chr10-37105824-SNV-C-T	asm
chr10	37105826	37105826	SNV	T	C	chr10-37105826-SNV-T-C	asm
chr10	37105829	37105829	SNV	C	G	chr10-37105829-SNV-C-G	asm
chr10	37105834	37105834	SNV	C	A	chr10-37105834-SNV-C-A	asm
chr10	37110559	37110559	SNV	T	G	chr10-37110559-SNV-T-G	asm
chr10	37110572	37110572	SNV	G	A	chr10-37110572-SNV-G-A	asm
chr10	37110573	37110573	SNV	T	G	chr10-37110573-SNV-T-G	asm
chr10	37110597	37110597	SNV	T	A	chr10-37110597-SNV-T-A	asm
chr10	37110612	37110612	SNV	T	G	chr10-37110612-SNV-T-G	asm
chr10	37110633	37110633	SNV	T	G	chr10-37110633-SNV-T-G	asm
chr10	37110664	37110664	SNV	G	T	chr10-37110664-SNV-G-T	asm
chr10	37110669	37110669	SNV	A	G	chr10-37110669-SNV-A-G	asm
chr10	37110690	37110690	SNV	A	T	chr10-37110690-SNV-A-T	asm
chr10	37110729	37110729	SNV	G	A	chr10-37110729-SNV-G-A	asm
chr10	37110735	37110735	SNV	T	A	chr10-37110735-SNV-T-A	asm
chr10	37110752	37110752	SNV	A	T	chr10-37110752-SNV-A-T	asm
chr10	37110803	37110803	SNV	A	T	chr10-37110803-SNV-A-T	asm
chr10	37110811	37110811	SNV	C	T	chr10-37110811-SNV-C-T	asm
chr10	37110812	37110812	SNV	A	T	chr10-37110812-SNV-A-T	asm
chr10	37110817	37110817	SNV	C	T	chr10-37110817-SNV-C-T	asm
chr10	37110826	37110826	SNV	A	T	chr10-37110826-SNV-A-T	asm
chr10	37110861	37110861	SNV	A	T	chr10-37110861-SNV-A-T	asm
chr10	37110863	37110863	SNV	C	T	chr10-37110863-SNV-C-T	asm
chr10	37110888	37110888	SNV	A	G	chr10-37110888-SNV-A-G	asm
chr10	37110939	37110939	SNV	T	A	chr10-37110939-SNV-T-A	asm
chr10	37110942	37110942	SNV	C	T	chr10-37110942-SNV-C-T	asm
chr10	37110962	37110962	SNV	T	A	chr10-37110962-SNV-T-A	asm
chr10	37110976	37110976	SNV	C	A	chr10-37110976-SNV-C-A	asm
chr10	37111034	37111034	SNV	G	T	chr10-37111034-SNV-G-T	asm
chr10	37111048	37111048	SNV	G	C	chr10-37111048-SNV-G-C	asm
chr10	37111059	37111059	SNV	T	G	chr10-37111059-SNV-T-G	asm
chr10	37111098	37111098	SNV	C	A	chr10-37111098-SNV-C-A	asm
chr10	37111145	37111145	SNV	T	A	chr10-37111145-SNV-T-A	asm
chr10	37111149	37111149	SNV	A	C	chr10-37111149-SNV-A-C	asm
chr10	37111162	37111162	SNV	A	C	chr10-37111162-SNV-A-C	asm
chr10	37111167	37111167	SNV	C	T	chr10-37111167-SNV-C-T	asm
chr10	37111197	37111197	SNV	C	A	chr10-37111197-SNV-C-A	asm
chr10	37111223	37111223	SNV	C	G	chr10-37111223-SNV-C-G	asm
chr10	37111313	37111313	SNV	C	T	chr10-37111313-SNV-C-T	asm
chr10	37111331	37111331	SNV	A	T	chr10-37111331-SNV-A-T	asm
chr10	37111352	37111352	SNV	A	T	chr10-37111352-SNV-A-T	asm
chr10	37111389	37111389	SNV	C	A	chr10-37111389-SNV-C-A	asm
chr10	37111390	37111390	SNV	C	A	chr10-37111390-SNV-C-A	asm
chr10	37111394	37111394	SNV	A	T	chr10-37111394-SNV-A-T	asm
chr10	37111423	37111423	SNV	G	T	chr10-37111423-SNV-G-T	asm
chr10	37111566	37111566	SNV	T	A	chr10-37111566-SNV-T-A	asm
chr10	37111626	37111626	SNV	G	A	chr10-37111626-SNV-G-A	asm
chr10	37111644	37111644	SNV	A	T	chr10-37111644-SNV-A-T	asm
chr10	73660103	73660103	SNV	C	A	chr10-73660103-SNV-C-A	asm
chr10	73660106	73660106	SNV	C	A	chr10-73660106-SNV-C-A	asm
chr10	73660107	73660107	SNV	T	A	chr10-73660107-SNV-T-A	asm
chr10	73660108	73660108	SNV	C	A	chr10-73660108-SNV-C-A	asm
chr10	73660110	73660110	SNV	C	T	chr10-73660110-SNV-C-T	asm
chr10	73660111	73660111	SNV	T	G	chr10-73660111-SNV-T-G	asm
chr10	73660113	73660113	SNV	A	G	chr10-73660113-SNV-A-G	asm
chr10	73660128	73660128	SNV	C	T	chr10-73660128-SNV-C-T	asm
chr10	73660130	73660130	SNV	C	A	chr10-73660130-SNV-C-A	asm
chr10	73660131	73660131	SNV	A	G	chr10-73660131-SNV-A-G	asm
chr10	73660133	73660133	SNV	T	G	chr10-73660133-SNV-T-G	asm
chr10	73660134	73660134	SNV	T	A	chr10-73660134-SNV-T-A	asm
chr10	73660135	73660135	SNV	T	G	chr10-73660135-SNV-T-G	asm
chr10	73660138	73660138	SNV	T	G	chr10-73660138-SNV-T-G	asm
chr10	73660150	73660150	SNV	T	A	chr10-73660150-SNV-T-A	asm
chr10	114491012	114491012	SNV	G	A	chr10-114491012-SNV-G-A	asm
chr10	122588853	122588853	SNV	G	A	chr10-122588853-SNV-G-A	asm
chr10	122588864	122588864	SNV	A	C	chr10-122588864-SNV-A-C	asm
chr10	122588870	122588870	SNV	C	T	chr10-122588870-SNV-C-T	asm
chr10	122588882	122588882	SNV	T	C	chr10-122588882-SNV-T-C	asm
chr10	122588883	122588883	SNV	G	A	chr10-122588883-SNV-G-A	asm
chr10	122588885	122588885	SNV	G	T	chr10-122588885-SNV-G-T	asm
chr10	122588894	122588894	SNV	C	T	chr10-122588894-SNV-C-T	asm
chr10	122588903	122588903	SNV	G	C	chr10-122588903-SNV-G-C	asm
chr10	122588904	122588904	SNV	C	A	chr10-122588904-SNV-C-A	asm
chr10	122588915	122588915	SNV	T	G	chr10-122588915-SNV-T-G	asm
chr10	122588932	122588932	SNV	G	T	chr10-122588932-SNV-G-T	asm
chr10	122588936	122588936	SNV	T	C	chr10-122588936-SNV-T-C	asm
chr10	122588940	122588940	SNV	A	G	chr10-122588940-SNV-A-G	asm
chr10	122588946	122588946	SNV	C	T	chr10-122588946-SNV-C-T	asm
chr10	122589026	122589026	SNV	T	C	chr10-122589026-SNV-T-C	asm
chr10	122589106	122589106	SNV	C	T	chr10-122589106-SNV-C-T	asm
chr10	122589109	122589109	SNV	C	T	chr10-122589109-SNV-C-T	asm
chr10	122589110	122589110	SNV	A	G	chr10-122589110-SNV-A-G	asm
chr10	122589164	122589164	SNV	T	C	chr10-122589164-SNV-T-C	asm
chr10	122589179	122589179	SNV	A	G	chr10-122589179-SNV-A-G	asm
chr10	122589180	122589180	SNV	C	A	chr10-122589180-SNV-C-A	asm
chr10	122589192	122589192	SNV	C	T	chr10-122589192-SNV-C-T	asm
chr10	122589207	122589207	SNV	A	C	chr10-122589207-SNV-A-C	asm
chr10	122589227	122589227	SNV	C	T	chr10-122589227-SNV-C-T	asm
chr10	122589240	122589240	SNV	C	A	chr10-122589240-SNV-C-A	asm
chr10	122589241	122589241	SNV	A	G	chr10-122589241-SNV-A-G	asm
chr10	122589248	122589248	SNV	T	C	chr10-122589248-SNV-T-C	asm
chr10	122589279	122589279	SNV	G	A	chr10-122589279-SNV-G-A	asm
chr10	122589280	122589280	SNV	C	G	chr10-122589280-SNV-C-G	asm
chr10	122589282	122589282	SNV	A	C	chr10-122589282-SNV-A-C	asm
chr10	122589314	122589314	SNV	C	T	chr10-122589314-SNV-C-T	asm
chr10	122589324	122589324	SNV	A	T	chr10-122589324-SNV-A-T	asm
chr10	122589325	122589325	SNV	G	T	chr10-122589325-SNV-G-T	asm
chr10	122589326	122589326	SNV	G	T	chr10-122589326-SNV-G-T	asm
chr10	122589328	122589328	SNV	C	A	chr10-122589328-SNV-C-A	asm
chr10	122589350	122589350	SNV	C	T	chr10-122589350-SNV-C-T	asm
chr10	122589365	122589365	SNV	C	T	chr10-122589365-SNV-C-T	asm
chr10	122589374	122589374	SNV	G	A	chr10-122589374-SNV-G-A	asm
chr10	122589384	122589384	SNV	T	C	chr10-122589384-SNV-T-C	asm
chr10	122589399	122589399	SNV	T	C	chr10-122589399-SNV-T-C	asm
chr10	122589409	122589409	SNV	T	C	chr10-122589409-SNV-T-C	asm
chr10	122589428	122589428	SNV	G	T	chr10-122589428-SNV-G-T	asm
chr10	122589484	122589484	SNV	T	C	chr10-122589484-SNV-T-C	asm
chr10	122589485	122589485	SNV	G	A	chr10-122589485-SNV-G-A	asm
chr10	122589501	122589501	SNV	C	T	chr10-122589501-SNV-C-T	asm
chr10	122589502	122589502	SNV	A	G	chr10-122589502-SNV-A-G	asm
chr10	122589528	122589528	SNV	G	C	chr10-122589528-SNV-G-C	asm
chr10	122589534	122589534	SNV	G	C	chr10-122589534-SNV-G-C	asm
chr10	122589537	122589537	SNV	T	C	chr10-122589537-SNV-T-C	asm
chr10	122589548	122589548	SNV	A	C	chr10-122589548-SNV-A-C	asm
chr10	122589572	122589572	SNV	G	A	chr10-122589572-SNV-G-A	asm
chr10	122589580	122589580	SNV	T	C	chr10-122589580-SNV-T-C	asm
chr10	122589587	122589587	SNV	A	G	chr10-122589587-SNV-A-G	asm
chr10	122589598	122589598	SNV	A	T	chr10-122589598-SNV-A-T	asm
chr10	122589604	122589604	SNV	C	T	chr10-122589604-SNV-C-T	asm
chr10	122589605	122589605	SNV	A	T	chr10-122589605-SNV-A-T	asm
chr10	122589633	122589633	SNV	A	G	chr10-122589633-SNV-A-G	asm
chr10	122589641	122589641	SNV	G	A	chr10-122589641-SNV-G-A	asm
chr10	122589653	122589653	SNV	T	C	chr10-122589653-SNV-T-C	asm
chr10	122589666	122589666	SNV	C	G	chr10-122589666-SNV-C-G	asm
chr10	122589667	122589667	SNV	A	G	chr10-122589667-SNV-A-G	asm
chr10	122589668	122589668	SNV	G	A	chr10-122589668-SNV-G-A	asm
chr10	122589684	122589684	SNV	G	A	chr10-122589684-SNV-G-A	asm
chr10	122589698	122589698	SNV	G	A	chr10-122589698-SNV-G-A	asm
chr10	122589717	122589717	SNV	A	G	chr10-122589717-SNV-A-G	asm
chr10	122589718	122589718	SNV	G	A	chr10-122589718-SNV-G-A	asm
chr10	122589729	122589729	SNV	G	A	chr10-122589729-SNV-G-A	asm
chr10	122589733	122589733	SNV	C	T	chr10-122589733-SNV-C-T	asm
chr10	122589734	122589734	SNV	A	G	chr10-122589734-SNV-A-G	asm
chr10	122589750	122589750	SNV	G	A	chr10-122589750-SNV-G-A	asm
chr10	122589753	122589753	SNV	G	A	chr10-122589753-SNV-G-A	asm
chr10	122589760	122589760	SNV	A	G	chr10-122589760-SNV-A-G	asm
chr10	122589764	122589764	SNV	A	G	chr10-122589764-SNV-A-G	asm
chr10	122589772	122589772	SNV	G	A	chr10-122589772-SNV-G-A	asm
chr10	122589774	122589774	SNV	T	A	chr10-122589774-SNV-T-A	asm
chr10	122589775	122589775	SNV	C	G	chr10-122589775-SNV-C-G	asm
chr10	122589790	122589790	SNV	T	C	chr10-122589790-SNV-T-C	asm
chr10	122589795	122589795	SNV	G	T	chr10-122589795-SNV-G-T	asm
chr10	122589800	122589800	SNV	A	G	chr10-122589800-SNV-A-G	asm
chr10	122589817	122589817	SNV	C	T	chr10-122589817-SNV-C-T	asm
chr10	122589826	122589826	SNV	T	C	chr10-122589826-SNV-T-C	asm
chr10	122589835	122589835	SNV	G	A	chr10-122589835-SNV-G-A	asm
chr10	122589845	122589845	SNV	G	A	chr10-122589845-SNV-G-A	asm
chr10	122589854	122589854	SNV	T	G	chr10-122589854-SNV-T-G	asm
chr10	122589855	122589855	SNV	G	A	chr10-122589855-SNV-G-A	asm
chr10	122589862	122589862	SNV	T	C	chr10-122589862-SNV-T-C	asm
chr10	122589864	122589864	SNV	C	T	chr10-122589864-SNV-C-T	asm
chr10	122589888	122589888	SNV	G	A	chr10-122589888-SNV-G-A	asm
chr10	122589932	122589932	SNV	G	A	chr10-122589932-SNV-G-A	asm
chr10	122589933	122589933	SNV	T	G	chr10-122589933-SNV-T-G	asm
chr10	122589951	122589951	SNV	T	A	chr10-122589951-SNV-T-A	asm
chr10	122589960	122589960	SNV	C	T	chr10-122589960-SNV-C-T	asm
chr10	122589961	122589961	SNV	A	G	chr10-122589961-SNV-A-G	asm
chr10	122589965	122589965	SNV	G	C	chr10-122589965-SNV-G-C	asm
chr10	122589981	122589981	SNV	T	C	chr10-122589981-SNV-T-C	asm
chr10	122589990	122589990	SNV	C	T	chr10-122589990-SNV-C-T	asm
chr10	122590023	122590023	SNV	G	C	chr10-122590023-SNV-G-C	asm
chr10	122590036	122590036	SNV	T	C	chr10-122590036-SNV-T-C	asm
chr10	122590037	122590037	SNV	G	A	chr10-122590037-SNV-G-A	asm
chr10	122590041	122590041	SNV	G	A	chr10-122590041-SNV-G-A	asm
chr10	122590046	122590046	SNV	C	G	chr10-122590046-SNV-C-G	asm
chr10	122590052	122590052	SNV	A	G	chr10-122590052-SNV-A-G	asm
chr10	122590056	122590056	SNV	C	G	chr10-122590056-SNV-C-G	asm
chr10	122590059	122590059	SNV	C	T	chr10-122590059-SNV-C-T	asm
chr10	122590067	122590067	SNV	G	T	chr10-122590067-SNV-G-T	asm
chr10	122590079	122590079	SNV	A	G	chr10-122590079-SNV-A-G	asm
chr10	122590084	122590084	SNV	T	C	chr10-122590084-SNV-T-C	asm
chr10	122590103	122590103	SNV	C	T	chr10-122590103-SNV-C-T	asm
chr10	122590107	122590107	SNV	C	T	chr10-122590107-SNV-C-T	asm
chr10	122590115	122590115	SNV	C	A	chr10-122590115-SNV-C-A	asm
chr10	122590117	122590117	SNV	C	T	chr10-122590117-SNV-C-T	asm
chr10	122590119	122590119	SNV	G	A	chr10-122590119-SNV-G-A	asm
chr10	122590136	122590136	SNV	T	C	chr10-122590136-SNV-T-C	asm
chr10	122590158	122590158	SNV	C	G	chr10-122590158-SNV-C-G	asm
chr10	122590163	122590163	SNV	C	T	chr10-122590163-SNV-C-T	asm
chr10	122590164	122590164	SNV	T	C	chr10-122590164-SNV-T-C	asm
chr10	122590168	122590168	SNV	T	A	chr10-122590168-SNV-T-A	asm
chr10	122590176	122590176	SNV	A	T	chr10-122590176-SNV-A-T	asm
chr10	122590177	122590177	SNV	G	A	chr10-122590177-SNV-G-A	asm
chr10	122590182	122590182	SNV	G	A	chr10-122590182-SNV-G-A	asm
chr10	122590211	122590211	SNV	C	T	chr10-122590211-SNV-C-T	asm
chr10	122590237	122590237	SNV	C	T	chr10-122590237-SNV-C-T	asm
chr10	122590238	122590238	SNV	A	G	chr10-122590238-SNV-A-G	asm
chr10	122590249	122590249	SNV	A	G	chr10-122590249-SNV-A-G	asm
chr10	122590254	122590254	SNV	A	G	chr10-122590254-SNV-A-G	asm
chr10	122590264	122590264	SNV	A	G	chr10-122590264-SNV-A-G	asm
chr10	122590269	122590269	SNV	G	A	chr10-122590269-SNV-G-A	asm
chr10	122590282	122590282	SNV	T	G	chr10-122590282-SNV-T-G	asm
chr10	122590286	122590286	SNV	G	C	chr10-122590286-SNV-G-C	asm
chr10	122590287	122590287	SNV	C	T	chr10-122590287-SNV-C-T	asm
chr10	122590289	122590289	SNV	G	A	chr10-122590289-SNV-G-A	asm
chr10	122590354	122590354	SNV	T	A	chr10-122590354-SNV-T-A	asm
chr10	122590397	122590397	SNV	C	T	chr10-122590397-SNV-C-T	asm
chr10	122590401	122590401	SNV	T	C	chr10-122590401-SNV-T-C	asm
chr10	122590409	122590409	SNV	A	T	chr10-122590409-SNV-A-T	asm
chr10	122590438	122590438	SNV	G	A	chr10-122590438-SNV-G-A	asm
chr10	122590443	122590443	SNV	T	C	chr10-122590443-SNV-T-C	asm
chr10	122590996	122590996	SNV	C	G	chr10-122590996-SNV-C-G	asm
chr10	122591004	122591004	SNV	G	A	chr10-122591004-SNV-G-A	asm
chr10	122591019	122591019	SNV	G	A	chr10-122591019-SNV-G-A	asm
chr10	122591036	122591036	SNV	C	A	chr10-122591036-SNV-C-A	asm
chr10	122591038	122591038	SNV	C	G	chr10-122591038-SNV-C-G	asm
chr10	122591040	122591040	SNV	A	G	chr10-122591040-SNV-A-G	asm
chr10	122591043	122591043	SNV	C	A	chr10-122591043-SNV-C-A	asm
chr10	122591054	122591054	SNV	T	C	chr10-122591054-SNV-T-C	asm
chr10	122591066	122591066	SNV	G	A	chr10-122591066-SNV-G-A	asm
chr10	122591073	122591073	SNV	C	A	chr10-122591073-SNV-C-A	asm
chr10	122591089	122591089	SNV	C	T	chr10-122591089-SNV-C-T	asm
chr10	122591091	122591091	SNV	T	G	chr10-122591091-SNV-T-G	asm
chr10	122591093	122591093	SNV	G	A	chr10-122591093-SNV-G-A	asm
chr10	122591123	122591123	SNV	C	T	chr10-122591123-SNV-C-T	asm
chr10	122591126	122591126	SNV	A	G	chr10-122591126-SNV-A-G	asm
chr10	122591157	122591157	SNV	T	C	chr10-122591157-SNV-T-C	asm
chr10	122591159	122591159	SNV	T	G	chr10-122591159-SNV-T-G	asm
chr10	122591160	122591160	SNV	C	T	chr10-122591160-SNV-C-T	asm
chr10	122591163	122591163	SNV	G	C	chr10-122591163-SNV-G-C	asm
chr10	122591164	122591164	SNV	C	A	chr10-122591164-SNV-C-A	asm
chr10	122591165	122591165	SNV	G	A	chr10-122591165-SNV-G-A	asm
chr10	122591167	122591167	SNV	G	C	chr10-122591167-SNV-G-C	asm
chr10	122591180	122591180	SNV	T	A	chr10-122591180-SNV-T-A	asm
chr10	122591195	122591195	SNV	C	T	chr10-122591195-SNV-C-T	asm
chr10	122591200	122591200	SNV	C	T	chr10-122591200-SNV-C-T	asm
chr10	122591228	122591228	SNV	T	C	chr10-122591228-SNV-T-C	asm
chr10	122591253	122591253	SNV	G	A	chr10-122591253-SNV-G-A	asm
chr10	122591257	122591257	SNV	T	C	chr10-122591257-SNV-T-C	asm
chr10	122591272	122591272	SNV	C	T	chr10-122591272-SNV-C-T	asm
chr10	122591282	122591282	SNV	C	T	chr10-122591282-SNV-C-T	asm
chr10	122591297	122591297	SNV	T	C	chr10-122591297-SNV-T-C	asm
chr10	122591302	122591302	SNV	A	C	chr10-122591302-SNV-A-C	asm
chr10	122591313	122591313	SNV	G	T	chr10-122591313-SNV-G-T	asm
chr10	122591314	122591314	SNV	G	C	chr10-122591314-SNV-G-C	asm
chr10	122591318	122591318	SNV	T	A	chr10-122591318-SNV-T-A	asm
chr10	122591323	122591323	SNV	C	A	chr10-122591323-SNV-C-A	asm
chr10	122591327	122591327	SNV	A	G	chr10-122591327-SNV-A-G	asm
chr10	122591331	122591331	SNV	A	G	chr10-122591331-SNV-A-G	asm
chr10	122591332	122591332	SNV	C	A	chr10-122591332-SNV-C-A	asm
chr10	122591336	122591336	SNV	C	G	chr10-122591336-SNV-C-G	asm
chr10	122591366	122591366	SNV	G	A	chr10-122591366-SNV-G-A	asm
chr10	122591367	122591367	SNV	G	A	chr10-122591367-SNV-G-A	asm
chr10	122591371	122591371	SNV	T	C	chr10-122591371-SNV-T-C	asm
chr10	122591378	122591378	SNV	G	C	chr10-122591378-SNV-G-C	asm
chr10	122591379	122591379	SNV	G	C	chr10-122591379-SNV-G-C	asm
chr10	122591381	122591381	SNV	A	G	chr10-122591381-SNV-A-G	asm
chr10	122591382	122591382	SNV	G	T	chr10-122591382-SNV-G-T	asm
chr10	122591384	122591384	SNV	A	G	chr10-122591384-SNV-A-G	asm
chr10	122591386	122591386	SNV	A	T	chr10-122591386-SNV-A-T	asm
chr10	122591402	122591402	SNV	T	C	chr10-122591402-SNV-T-C	asm
chr10	122591404	122591404	SNV	G	A	chr10-122591404-SNV-G-A	asm
chr10	122591407	122591407	SNV	C	T	chr10-122591407-SNV-C-T	asm
chr10	122591408	122591408	SNV	A	G	chr10-122591408-SNV-A-G	asm
chr10	122591414	122591414	SNV	C	T	chr10-122591414-SNV-C-T	asm
chr10	122591434	122591434	SNV	T	A	chr10-122591434-SNV-T-A	asm
chr10	122591442	122591442	SNV	C	G	chr10-122591442-SNV-C-G	asm
chr10	122591476	122591476	SNV	C	A	chr10-122591476-SNV-C-A	asm
chr10	122591487	122591487	SNV	T	C	chr10-122591487-SNV-T-C	asm
chr10	122591494	122591494	SNV	T	C	chr10-122591494-SNV-T-C	asm
chr10	122591498	122591498	SNV	G	A	chr10-122591498-SNV-G-A	asm
chr10	122591505	122591505	SNV	C	G	chr10-122591505-SNV-C-G	asm
chr10	122591510	122591510	SNV	G	A	chr10-122591510-SNV-G-A	asm
chr10	122591521	122591521	SNV	A	C	chr10-122591521-SNV-A-C	asm
chr10	122591523	122591523	SNV	T	G	chr10-122591523-SNV-T-G	asm
chr10	122591528	122591528	SNV	C	T	chr10-122591528-SNV-C-T	asm
chr10	122591540	122591540	SNV	C	A	chr10-122591540-SNV-C-A	asm
chr10	122591559	122591559	SNV	C	T	chr10-122591559-SNV-C-T	asm
chr10	122591576	122591576	SNV	C	T	chr10-122591576-SNV-C-T	asm
chr10	122591588	122591588	SNV	T	G	chr10-122591588-SNV-T-G	asm
chr10	122591602	122591602	SNV	A	G	chr10-122591602-SNV-A-G	asm
chr10	122591609	122591609	SNV	C	T	chr10-122591609-SNV-C-T	asm
chr10	122591624	122591624	SNV	C	T	chr10-122591624-SNV-C-T	asm
chr10	122591635	122591635	SNV	G	A	chr10-122591635-SNV-G-A	asm
chr10	122591636	122591636	SNV	C	T	chr10-122591636-SNV-C-T	asm
chr10	122591666	122591666	SNV	A	G	chr10-122591666-SNV-A-G	asm
chr10	122591674	122591674	SNV	C	T	chr10-122591674-SNV-C-T	asm
chr10	122591676	122591676	SNV	G	C	chr10-122591676-SNV-G-C	asm
chr10	122591677	122591677	SNV	G	T	chr10-122591677-SNV-G-T	asm
chr10	122591680	122591680	SNV	G	T	chr10-122591680-SNV-G-T	asm
chr10	122591687	122591687	SNV	A	G	chr10-122591687-SNV-A-G	asm
chr10	122591694	122591694	SNV	G	A	chr10-122591694-SNV-G-A	asm
chr10	122591700	122591700	SNV	T	G	chr10-122591700-SNV-T-G	asm
chr10	122591702	122591702	SNV	T	C	chr10-122591702-SNV-T-C	asm
chr10	122591712	122591712	SNV	A	G	chr10-122591712-SNV-A-G	asm
chr10	122591718	122591718	SNV	T	C	chr10-122591718-SNV-T-C	asm
chr10	122591719	122591719	SNV	G	T	chr10-122591719-SNV-G-T	asm
chr10	122591721	122591721	SNV	T	G	chr10-122591721-SNV-T-G	asm
chr10	122591725	122591725	SNV	C	T	chr10-122591725-SNV-C-T	asm
chr10	122591727	122591727	SNV	G	C	chr10-122591727-SNV-G-C	asm
chr10	122591729	122591729	SNV	G	C	chr10-122591729-SNV-G-C	asm
chr10	122591743	122591743	SNV	T	A	chr10-122591743-SNV-T-A	asm
chr10	122591756	122591756	SNV	T	C	chr10-122591756-SNV-T-C	asm
chr10	122591771	122591771	SNV	A	G	chr10-122591771-SNV-A-G	asm
chr10	122591780	122591780	SNV	A	G	chr10-122591780-SNV-A-G	asm
chr10	122591794	122591794	SNV	G	T	chr10-122591794-SNV-G-T	asm
chr10	122591795	122591795	SNV	G	C	chr10-122591795-SNV-G-C	asm
chr10	122591802	122591802	SNV	A	G	chr10-122591802-SNV-A-G	asm
chr10	122591812	122591812	SNV	T	C	chr10-122591812-SNV-T-C	asm
chr10	122591815	122591815	SNV	T	C	chr10-122591815-SNV-T-C	asm
chr10	122591816	122591816	SNV	G	A	chr10-122591816-SNV-G-A	asm
chr10	122591825	122591825	SNV	T	C	chr10-122591825-SNV-T-C	asm
chr10	122591842	122591842	SNV	A	T	chr10-122591842-SNV-A-T	asm
chr10	122591849	122591849	SNV	A	C	chr10-122591849-SNV-A-C	asm
chr10	122591851	122591851	SNV	A	G	chr10-122591851-SNV-A-G	asm
chr10	122591867	122591867	SNV	T	C	chr10-122591867-SNV-T-C	asm
chr10	122591879	122591879	SNV	T	A	chr10-122591879-SNV-T-A	asm
chr10	122591881	122591881	SNV	T	C	chr10-122591881-SNV-T-C	asm
chr10	122591882	122591882	SNV	G	C	chr10-122591882-SNV-G-C	asm
chr10	122591892	122591892	SNV	C	T	chr10-122591892-SNV-C-T	asm
chr10	122591914	122591914	SNV	A	G	chr10-122591914-SNV-A-G	asm
chr10	122591923	122591923	SNV	C	T	chr10-122591923-SNV-C-T	asm
chr10	122591925	122591925	SNV	T	G	chr10-122591925-SNV-T-G	asm
chr10	122591936	122591936	SNV	A	T	chr10-122591936-SNV-A-T	asm
chr10	122591944	122591944	SNV	C	G	chr10-122591944-SNV-C-G	asm
chr10	122591945	122591945	SNV	G	A	chr10-122591945-SNV-G-A	asm
chr10	122591955	122591955	SNV	T	C	chr10-122591955-SNV-T-C	asm
chr10	122591961	122591961	SNV	A	G	chr10-122591961-SNV-A-G	asm
chr10	122591963	122591963	SNV	G	T	chr10-122591963-SNV-G-T	asm
chr10	122591979	122591979	SNV	A	T	chr10-122591979-SNV-A-T	asm
chr10	122592003	122592003	SNV	T	C	chr10-122592003-SNV-T-C	asm
chr10	122592017	122592017	SNV	G	C	chr10-122592017-SNV-G-C	asm
chr10	122592020	122592020	SNV	G	T	chr10-122592020-SNV-G-T	asm
chr10	122592025	122592025	SNV	C	T	chr10-122592025-SNV-C-T	asm
chr10	122592055	122592055	SNV	C	T	chr10-122592055-SNV-C-T	asm
chr10	122592060	122592060	SNV	T	C	chr10-122592060-SNV-T-C	asm
chr10	122592068	122592068	SNV	T	C	chr10-122592068-SNV-T-C	asm
chr10	122592069	122592069	SNV	C	T	chr10-122592069-SNV-C-T	asm
chr10	122592077	122592077	SNV	C	T	chr10-122592077-SNV-C-T	asm
chr10	122592088	122592088	SNV	G	A	chr10-122592088-SNV-G-A	asm
chr10	122592090	122592090	SNV	C	G	chr10-122592090-SNV-C-G	asm
chr10	122592098	122592098	SNV	G	T	chr10-122592098-SNV-G-T	asm
chr10	122592115	122592115	SNV	C	T	chr10-122592115-SNV-C-T	asm
chr10	122592117	122592117	SNV	G	C	chr10-122592117-SNV-G-C	asm
chr10	122592119	122592119	SNV	A	G	chr10-122592119-SNV-A-G	asm
chr10	122592148	122592148	SNV	G	A	chr10-122592148-SNV-G-A	asm
chr10	122592150	122592150	SNV	A	C	chr10-122592150-SNV-A-C	asm
chr10	122592153	122592153	SNV	C	T	chr10-122592153-SNV-C-T	asm
chr10	122592166	122592166	SNV	T	C	chr10-122592166-SNV-T-C	asm
chr10	122592169	122592169	SNV	T	C	chr10-122592169-SNV-T-C	asm
chr10	122592175	122592175	SNV	C	T	chr10-122592175-SNV-C-T	asm
chr10	122592179	122592179	SNV	C	T	chr10-122592179-SNV-C-T	asm
chr10	122592196	122592196	SNV	A	G	chr10-122592196-SNV-A-G	asm
chr10	122592211	122592211	SNV	C	T	chr10-122592211-SNV-C-T	asm
chr10	122592231	122592231	SNV	C	G	chr10-122592231-SNV-C-G	asm
chr10	122592232	122592232	SNV	A	C	chr10-122592232-SNV-A-C	asm
chr10	122592235	122592235	SNV	G	A	chr10-122592235-SNV-G-A	asm
chr10	122592243	122592243	SNV	G	T	chr10-122592243-SNV-G-T	asm
chr10	122592247	122592247	SNV	A	G	chr10-122592247-SNV-A-G	asm
chr10	122592264	122592264	SNV	C	T	chr10-122592264-SNV-C-T	asm
chr10	122592268	122592268	SNV	G	A	chr10-122592268-SNV-G-A	asm
chr10	122592274	122592274	SNV	T	C	chr10-122592274-SNV-T-C	asm
chr10	122592289	122592289	SNV	A	G	chr10-122592289-SNV-A-G	asm
chr10	122592310	122592310	SNV	A	G	chr10-122592310-SNV-A-G	asm
chr10	122592333	122592333	SNV	A	G	chr10-122592333-SNV-A-G	asm
chr10	122592354	122592354	SNV	C	T	chr10-122592354-SNV-C-T	asm
chr10	122592384	122592384	SNV	T	C	chr10-122592384-SNV-T-C	asm
chr10	122592438	122592438	SNV	G	A	chr10-122592438-SNV-G-A	asm
chr10	122592462	122592462	SNV	C	T	chr10-122592462-SNV-C-T	asm
chr10	122592483	122592483	SNV	T	C	chr10-122592483-SNV-T-C	asm
chr10	122592510	122592510	SNV	C	T	chr10-122592510-SNV-C-T	asm
chr10	122592535	122592535	SNV	C	A	chr10-122592535-SNV-C-A	asm
chr10	122595641	122595641	SNV	C	A	chr10-122595641-SNV-C-A	asm
chr10	122595642	122595642	SNV	C	T	chr10-122595642-SNV-C-T	asm
chr10	122595645	122595645	SNV	G	T	chr10-122595645-SNV-G-T	asm
chr10	122595648	122595648	SNV	C	T	chr10-122595648-SNV-C-T	asm
chr10	122595650	122595650	SNV	C	T	chr10-122595650-SNV-C-T	asm
chr10	122595673	122595673	SNV	T	C	chr10-122595673-SNV-T-C	asm
chr10	122595681	122595681	SNV	C	A	chr10-122595681-SNV-C-A	asm
chr10	122595700	122595700	SNV	G	A	chr10-122595700-SNV-G-A	asm
chr10	122595725	122595725	SNV	G	A	chr10-122595725-SNV-G-A	asm
chr10	122595736	122595736	SNV	A	G	chr10-122595736-SNV-A-G	asm
chr10	122595738	122595738	SNV	A	T	chr10-122595738-SNV-A-T	asm
chr10	122595761	122595761	SNV	C	T	chr10-122595761-SNV-C-T	asm
chr10	122595785	122595785	SNV	T	G	chr10-122595785-SNV-T-G	asm
chr10	122595808	122595808	SNV	G	A	chr10-122595808-SNV-G-A	asm
chr10	122595809	122595809	SNV	T	G	chr10-122595809-SNV-T-G	asm
chr10	122595817	122595817	SNV	C	T	chr10-122595817-SNV-C-T	asm
chr10	122595841	122595841	SNV	C	T	chr10-122595841-SNV-C-T	asm
chr10	122595852	122595852	SNV	A	C	chr10-122595852-SNV-A-C	asm
chr10	122595859	122595859	SNV	G	A	chr10-122595859-SNV-G-A	asm
chr10	122595891	122595891	SNV	T	G	chr10-122595891-SNV-T-G	asm
chr10	122595894	122595894	SNV	C	T	chr10-122595894-SNV-C-T	asm
chr10	122595895	122595895	SNV	A	G	chr10-122595895-SNV-A-G	asm
chr10	122595905	122595905	SNV	C	A	chr10-122595905-SNV-C-A	asm
chr10	122595929	122595929	SNV	A	G	chr10-122595929-SNV-A-G	asm
chr10	122595937	122595937	SNV	C	T	chr10-122595937-SNV-C-T	asm
chr10	122595938	122595938	SNV	T	C	chr10-122595938-SNV-T-C	asm
chr10	122595939	122595939	SNV	G	A	chr10-122595939-SNV-G-A	asm
chr10	122595941	122595941	SNV	T	G	chr10-122595941-SNV-T-G	asm
chr10	122595944	122595944	SNV	G	A	chr10-122595944-SNV-G-A	asm
chr10	122595952	122595952	SNV	G	A	chr10-122595952-SNV-G-A	asm
chr10	122595962	122595962	SNV	T	A	chr10-122595962-SNV-T-A	asm
chr10	122595996	122595996	SNV	C	G	chr10-122595996-SNV-C-G	asm
chr10	122595998	122595998	SNV	A	G	chr10-122595998-SNV-A-G	asm
chr10	122596016	122596016	SNV	C	T	chr10-122596016-SNV-C-T	asm
chr10	122596017	122596017	SNV	A	G	chr10-122596017-SNV-A-G	asm
chr10	122596025	122596025	SNV	A	C	chr10-122596025-SNV-A-C	asm
chr10	122596029	122596029	SNV	G	C	chr10-122596029-SNV-G-C	asm
chr10	122596030	122596030	SNV	G	A	chr10-122596030-SNV-G-A	asm
chr10	122596036	122596036	SNV	G	A	chr10-122596036-SNV-G-A	asm
chr10	122596047	122596047	SNV	A	G	chr10-122596047-SNV-A-G	asm
chr10	122596053	122596053	SNV	A	G	chr10-122596053-SNV-A-G	asm
chr10	122596060	122596060	SNV	A	G	chr10-122596060-SNV-A-G	asm
chr10	122596062	122596062	SNV	G	A	chr10-122596062-SNV-G-A	asm
chr10	122596080	122596080	SNV	G	A	chr10-122596080-SNV-G-A	asm
chr10	122596092	122596092	SNV	A	G	chr10-122596092-SNV-A-G	asm
chr10	122596093	122596093	SNV	A	T	chr10-122596093-SNV-A-T	asm
chr10	122596096	122596096	SNV	T	C	chr10-122596096-SNV-T-C	asm
chr10	122596097	122596097	SNV	G	A	chr10-122596097-SNV-G-A	asm
chr10	122596108	122596108	SNV	G	C	chr10-122596108-SNV-G-C	asm
chr10	122596116	122596116	SNV	A	G	chr10-122596116-SNV-A-G	asm
chr10	122596123	122596123	SNV	G	A	chr10-122596123-SNV-G-A	asm
chr10	122596127	122596127	SNV	G	A	chr10-122596127-SNV-G-A	asm
chr10	122596131	122596131	SNV	T	C	chr10-122596131-SNV-T-C	asm
chr10	122596135	122596135	SNV	A	G	chr10-122596135-SNV-A-G	asm
chr10	122596151	122596151	SNV	C	T	chr10-122596151-SNV-C-T	asm
chr10	122596161	122596161	SNV	G	A	chr10-122596161-SNV-G-A	asm
chr10	122596187	122596187	SNV	C	T	chr10-122596187-SNV-C-T	asm
chr10	122596206	122596206	SNV	A	G	chr10-122596206-SNV-A-G	asm
chr10	122596213	122596213	SNV	C	A	chr10-122596213-SNV-C-A	asm
chr10	122596215	122596215	SNV	G	T	chr10-122596215-SNV-G-T	asm
chr10	122596216	122596216	SNV	T	G	chr10-122596216-SNV-T-G	asm
chr10	122596222	122596222	SNV	T	C	chr10-122596222-SNV-T-C	asm
chr10	122596223	122596223	SNV	C	T	chr10-122596223-SNV-C-T	asm
chr10	122596238	122596238	SNV	C	A	chr10-122596238-SNV-C-A	asm
chr10	122596242	122596242	SNV	T	C	chr10-122596242-SNV-T-C	asm
chr10	122596243	122596243	SNV	G	A	chr10-122596243-SNV-G-A	asm
chr10	122596262	122596262	SNV	A	T	chr10-122596262-SNV-A-T	asm
chr10	122596273	122596273	SNV	T	C	chr10-122596273-SNV-T-C	asm
chr10	122596276	122596276	SNV	G	A	chr10-122596276-SNV-G-A	asm
chr10	122596278	122596278	SNV	T	C	chr10-122596278-SNV-T-C	asm
chr10	122596279	122596279	SNV	G	C	chr10-122596279-SNV-G-C	asm
chr10	122596283	122596283	SNV	T	C	chr10-122596283-SNV-T-C	asm
chr10	122596286	122596286	SNV	A	G	chr10-122596286-SNV-A-G	asm
chr10	122596288	122596288	SNV	C	G	chr10-122596288-SNV-C-G	asm
chr10	122596289	122596289	SNV	A	T	chr10-122596289-SNV-A-T	asm
chr10	122596294	122596294	SNV	G	T	chr10-122596294-SNV-G-T	asm
chr10	122596298	122596298	SNV	T	G	chr10-122596298-SNV-T-G	asm
chr10	122596304	122596304	SNV	G	A	chr10-122596304-SNV-G-A	asm
chr10	122596306	122596306	SNV	C	A	chr10-122596306-SNV-C-A	asm
chr10	122596309	122596309	SNV	T	C	chr10-122596309-SNV-T-C	asm
chr10	122596312	122596312	SNV	A	T	chr10-122596312-SNV-A-T	asm
chr10	122596313	122596313	SNV	G	C	chr10-122596313-SNV-G-C	asm
chr10	122596322	122596322	SNV	C	A	chr10-122596322-SNV-C-A	asm
chr10	122596351	122596351	SNV	T	C	chr10-122596351-SNV-T-C	asm
chr10	122596360	122596360	SNV	A	G	chr10-122596360-SNV-A-G	asm
chr10	122596364	122596364	SNV	T	A	chr10-122596364-SNV-T-A	asm
chr10	122596366	122596366	SNV	C	G	chr10-122596366-SNV-C-G	asm
chr10	122596367	122596367	SNV	A	T	chr10-122596367-SNV-A-T	asm
chr10	122596368	122596368	SNV	A	G	chr10-122596368-SNV-A-G	asm
chr10	122596374	122596374	SNV	T	G	chr10-122596374-SNV-T-G	asm
chr10	122596376	122596376	SNV	C	G	chr10-122596376-SNV-C-G	asm
chr10	122596377	122596377	SNV	A	G	chr10-122596377-SNV-A-G	asm
chr10	122596384	122596384	SNV	A	G	chr10-122596384-SNV-A-G	asm
chr10	122596396	122596396	SNV	A	G	chr10-122596396-SNV-A-G	asm
chr10	122596397	122596397	SNV	G	T	chr10-122596397-SNV-G-T	asm
chr10	122596399	122596399	SNV	A	T	chr10-122596399-SNV-A-T	asm
chr10	122596407	122596407	SNV	G	C	chr10-122596407-SNV-G-C	asm
chr10	122596412	122596412	SNV	T	G	chr10-122596412-SNV-T-G	asm
chr10	122596413	122596413	SNV	G	A	chr10-122596413-SNV-G-A	asm
chr10	122596418	122596418	SNV	C	A	chr10-122596418-SNV-C-A	asm
chr10	122596420	122596420	SNV	T	C	chr10-122596420-SNV-T-C	asm
chr10	122596429	122596429	SNV	C	T	chr10-122596429-SNV-C-T	asm
chr10	122596439	122596439	SNV	C	A	chr10-122596439-SNV-C-A	asm
chr10	122596445	122596445	SNV	C	T	chr10-122596445-SNV-C-T	asm
chr10	122596446	122596446	SNV	C	A	chr10-122596446-SNV-C-A	asm
chr10	122596451	122596451	SNV	A	G	chr10-122596451-SNV-A-G	asm
chr10	122596457	122596457	SNV	C	G	chr10-122596457-SNV-C-G	asm
chr10	122596459	122596459	SNV	C	G	chr10-122596459-SNV-C-G	asm
chr10	122596467	122596467	SNV	T	C	chr10-122596467-SNV-T-C	asm
chr10	122596479	122596479	SNV	A	G	chr10-122596479-SNV-A-G	asm
chr10	122596485	122596485	SNV	T	A	chr10-122596485-SNV-T-A	asm
chr10	122596487	122596487	SNV	A	G	chr10-122596487-SNV-A-G	asm
chr10	122596488	122596488	SNV	T	C	chr10-122596488-SNV-T-C	asm
chr10	122596489	122596489	SNV	G	A	chr10-122596489-SNV-G-A	asm
chr10	122596492	122596492	SNV	T	A	chr10-122596492-SNV-T-A	asm
chr10	122596493	122596493	SNV	T	G	chr10-122596493-SNV-T-G	asm
chr10	122596495	122596495	SNV	A	C	chr10-122596495-SNV-A-C	asm
chr10	122596497	122596497	SNV	A	G	chr10-122596497-SNV-A-G	asm
chr10	122596500	122596500	SNV	G	A	chr10-122596500-SNV-G-A	asm
chr10	122596511	122596511	SNV	A	G	chr10-122596511-SNV-A-G	asm
chr10	122596519	122596519	SNV	G	A	chr10-122596519-SNV-G-A	asm
chr10	122596523	122596523	SNV	G	C	chr10-122596523-SNV-G-C	asm
chr10	122596535	122596535	SNV	C	A	chr10-122596535-SNV-C-A	asm
chr10	122596536	122596536	SNV	T	A	chr10-122596536-SNV-T-A	asm
chr10	122596537	122596537	SNV	C	G	chr10-122596537-SNV-C-G	asm
chr10	122596547	122596547	SNV	A	G	chr10-122596547-SNV-A-G	asm
chr10	122596549	122596549	SNV	A	T	chr10-122596549-SNV-A-T	asm
chr10	122596566	122596566	SNV	C	G	chr10-122596566-SNV-C-G	asm
chr10	122596573	122596573	SNV	C	T	chr10-122596573-SNV-C-T	asm
chr10	122596574	122596574	SNV	A	G	chr10-122596574-SNV-A-G	asm
chr10	122596578	122596578	SNV	C	T	chr10-122596578-SNV-C-T	asm
chr10	122596598	122596598	SNV	T	C	chr10-122596598-SNV-T-C	asm
chr10	122596599	122596599	SNV	G	A	chr10-122596599-SNV-G-A	asm
chr10	122596610	122596610	SNV	G	A	chr10-122596610-SNV-G-A	asm
chr10	122596615	122596615	SNV	G	A	chr10-122596615-SNV-G-A	asm
chr10	122596619	122596619	SNV	T	A	chr10-122596619-SNV-T-A	asm
chr10	122596625	122596625	SNV	G	A	chr10-122596625-SNV-G-A	asm
chr10	122596627	122596627	SNV	A	G	chr10-122596627-SNV-A-G	asm
chr10	122596629	122596629	SNV	T	C	chr10-122596629-SNV-T-C	asm
chr10	122596631	122596631	SNV	T	G	chr10-122596631-SNV-T-G	asm
chr10	122596637	122596637	SNV	C	G	chr10-122596637-SNV-C-G	asm
chr10	122596643	122596643	SNV	G	T	chr10-122596643-SNV-G-T	asm
chr10	122596647	122596647	SNV	T	G	chr10-122596647-SNV-T-G	asm
chr10	122596653	122596653	SNV	A	G	chr10-122596653-SNV-A-G	asm
chr10	122596654	122596654	SNV	G	A	chr10-122596654-SNV-G-A	asm
chr10	122596662	122596662	SNV	A	C	chr10-122596662-SNV-A-C	asm
chr10	122596673	122596673	SNV	C	T	chr10-122596673-SNV-C-T	asm
chr10	122596687	122596687	SNV	A	G	chr10-122596687-SNV-A-G	asm
chr10	122596690	122596690	SNV	G	A	chr10-122596690-SNV-G-A	asm
chr10	122596694	122596694	SNV	C	G	chr10-122596694-SNV-C-G	asm
chr10	122596699	122596699	SNV	G	C	chr10-122596699-SNV-G-C	asm
chr10	122596704	122596704	SNV	A	T	chr10-122596704-SNV-A-T	asm
chr10	122596708	122596708	SNV	C	T	chr10-122596708-SNV-C-T	asm
chr10	122596712	122596712	SNV	G	T	chr10-122596712-SNV-G-T	asm
chr10	122596727	122596727	SNV	C	T	chr10-122596727-SNV-C-T	asm
chr10	122596731	122596731	SNV	C	T	chr10-122596731-SNV-C-T	asm
chr10	122596733	122596733	SNV	T	C	chr10-122596733-SNV-T-C	asm
chr10	122596739	122596739	SNV	A	G	chr10-122596739-SNV-A-G	asm
chr10	122596759	122596759	SNV	A	G	chr10-122596759-SNV-A-G	asm
chr10	122596762	122596762	SNV	C	T	chr10-122596762-SNV-C-T	asm
chr10	122596775	122596775	SNV	A	T	chr10-122596775-SNV-A-T	asm
chr10	122596799	122596799	SNV	A	G	chr10-122596799-SNV-A-G	asm
chr10	122596804	122596804	SNV	C	T	chr10-122596804-SNV-C-T	asm
chr10	122596813	122596813	SNV	G	A	chr10-122596813-SNV-G-A	asm
chr10	122596814	122596814	SNV	G	C	chr10-122596814-SNV-G-C	asm
chr10	122596823	122596823	SNV	C	T	chr10-122596823-SNV-C-T	asm
chr10	122596830	122596830	SNV	T	C	chr10-122596830-SNV-T-C	asm
chr10	122596836	122596836	SNV	A	G	chr10-122596836-SNV-A-G	asm
chr10	122596846	122596846	SNV	G	A	chr10-122596846-SNV-G-A	asm
chr10	122596859	122596859	SNV	C	T	chr10-122596859-SNV-C-T	asm
chr10	122596860	122596860	SNV	A	G	chr10-122596860-SNV-A-G	asm
chr10	122596863	122596863	SNV	C	T	chr10-122596863-SNV-C-T	asm
chr10	122596865	122596865	SNV	C	T	chr10-122596865-SNV-C-T	asm
chr10	122596878	122596878	SNV	C	T	chr10-122596878-SNV-C-T	asm
chr10	122596888	122596888	SNV	A	G	chr10-122596888-SNV-A-G	asm
chr10	122596922	122596922	SNV	C	A	chr10-122596922-SNV-C-A	asm
chr10	122596940	122596940	SNV	A	G	chr10-122596940-SNV-A-G	asm
chr10	122596941	122596941	SNV	T	C	chr10-122596941-SNV-T-C	asm
chr10	122596942	122596942	SNV	G	T	chr10-122596942-SNV-G-T	asm
chr10	122596944	122596944	SNV	T	C	chr10-122596944-SNV-T-C	asm
chr10	122596946	122596946	SNV	T	A	chr10-122596946-SNV-T-A	asm
chr10	122596959	122596959	SNV	C	G	chr10-122596959-SNV-C-G	asm
chr10	122596960	122596960	SNV	C	T	chr10-122596960-SNV-C-T	asm
chr10	122596971	122596971	SNV	C	T	chr10-122596971-SNV-C-T	asm
chr10	122596973	122596973	SNV	A	G	chr10-122596973-SNV-A-G	asm
chr10	122597032	122597032	SNV	C	G	chr10-122597032-SNV-C-G	asm
chr10	122597036	122597036	SNV	T	C	chr10-122597036-SNV-T-C	asm
chr10	122597050	122597050	SNV	T	G	chr10-122597050-SNV-T-G	asm
chr10	122597090	122597090	SNV	C	T	chr10-122597090-SNV-C-T	asm
chr10	122597099	122597099	SNV	T	C	chr10-122597099-SNV-T-C	asm
chr10	122597101	122597101	SNV	T	C	chr10-122597101-SNV-T-C	asm
chr10	122597110	122597110	SNV	C	T	chr10-122597110-SNV-C-T	asm
chr10	122597114	122597114	SNV	C	T	chr10-122597114-SNV-C-T	asm
chr10	122597115	122597115	SNV	T	C	chr10-122597115-SNV-T-C	asm
chr10	122597116	122597116	SNV	G	C	chr10-122597116-SNV-G-C	asm
chr10	122597119	122597119	SNV	C	T	chr10-122597119-SNV-C-T	asm
chr10	122597134	122597134	SNV	G	C	chr10-122597134-SNV-G-C	asm
chr10	122597140	122597140	SNV	C	A	chr10-122597140-SNV-C-A	asm
chr10	122597141	122597141	SNV	T	C	chr10-122597141-SNV-T-C	asm
chr10	122597145	122597145	SNV	A	T	chr10-122597145-SNV-A-T	asm
chr10	122597149	122597149	SNV	A	G	chr10-122597149-SNV-A-G	asm
chr10	122597155	122597155	SNV	A	G	chr10-122597155-SNV-A-G	asm
chr10	122597156	122597156	SNV	C	T	chr10-122597156-SNV-C-T	asm
chr10	122597157	122597157	SNV	A	G	chr10-122597157-SNV-A-G	asm
chr10	122597158	122597158	SNV	T	G	chr10-122597158-SNV-T-G	asm
chr10	122597160	122597160	SNV	G	T	chr10-122597160-SNV-G-T	asm
chr10	122597166	122597166	SNV	A	T	chr10-122597166-SNV-A-T	asm
chr10	122597196	122597196	SNV	G	A	chr10-122597196-SNV-G-A	asm
chr10	122597198	122597198	SNV	A	C	chr10-122597198-SNV-A-C	asm
chr10	122597203	122597203	SNV	C	A	chr10-122597203-SNV-C-A	asm
chr10	122597210	122597210	SNV	G	T	chr10-122597210-SNV-G-T	asm
chr10	122597227	122597227	SNV	C	A	chr10-122597227-SNV-C-A	asm
chr10	122597229	122597229	SNV	A	G	chr10-122597229-SNV-A-G	asm
chr10	122597230	122597230	SNV	G	A	chr10-122597230-SNV-G-A	asm
chr10	122597369	122597369	SNV	C	T	chr10-122597369-SNV-C-T	asm
chr10	122597373	122597373	SNV	C	T	chr10-122597373-SNV-C-T	asm
chr10	122597376	122597376	SNV	G	A	chr10-122597376-SNV-G-A	asm
chr10	122597409	122597409	SNV	T	A	chr10-122597409-SNV-T-A	asm
chr10	122597412	122597412	SNV	C	G	chr10-122597412-SNV-C-G	asm
chr10	122597417	122597417	SNV	G	T	chr10-122597417-SNV-G-T	asm
chr10	122597439	122597439	SNV	G	C	chr10-122597439-SNV-G-C	asm
chr10	122597445	122597445	SNV	G	T	chr10-122597445-SNV-G-T	asm
chr10	122597449	122597449	SNV	C	T	chr10-122597449-SNV-C-T	asm
chr10	122597450	122597450	SNV	A	G	chr10-122597450-SNV-A-G	asm
chr10	122597477	122597477	SNV	C	T	chr10-122597477-SNV-C-T	asm
chr10	122597484	122597484	SNV	C	A	chr10-122597484-SNV-C-A	asm
chr10	122597499	122597499	SNV	C	A	chr10-122597499-SNV-C-A	asm
chr10	122597500	122597500	SNV	A	G	chr10-122597500-SNV-A-G	asm
chr10	122597512	122597512	SNV	T	G	chr10-122597512-SNV-T-G	asm
chr10	122597514	122597514	SNV	T	G	chr10-122597514-SNV-T-G	asm
chr10	122597522	122597522	SNV	T	C	chr10-122597522-SNV-T-C	asm
chr10	122597523	122597523	SNV	A	C	chr10-122597523-SNV-A-C	asm
chr10	122597527	122597527	SNV	G	C	chr10-122597527-SNV-G-C	asm
chr10	122597529	122597529	SNV	G	A	chr10-122597529-SNV-G-A	asm
chr10	122597531	122597531	SNV	A	C	chr10-122597531-SNV-A-C	asm
chr10	122597539	122597539	SNV	G	C	chr10-122597539-SNV-G-C	asm
chr10	122597545	122597545	SNV	T	G	chr10-122597545-SNV-T-G	asm
chr10	122597550	122597550	SNV	C	T	chr10-122597550-SNV-C-T	asm
chr10	122597551	122597551	SNV	A	G	chr10-122597551-SNV-A-G	asm
chr10	122597557	122597557	SNV	G	A	chr10-122597557-SNV-G-A	asm
chr10	122597569	122597569	SNV	G	C	chr10-122597569-SNV-G-C	asm
chr10	122597574	122597574	SNV	A	T	chr10-122597574-SNV-A-T	asm
chr10	122597577	122597577	SNV	A	G	chr10-122597577-SNV-A-G	asm
chr10	122597585	122597585	SNV	T	C	chr10-122597585-SNV-T-C	asm
chr10	122597587	122597587	SNV	G	T	chr10-122597587-SNV-G-T	asm
chr10	122597599	122597599	SNV	A	G	chr10-122597599-SNV-A-G	asm
chr10	122597601	122597601	SNV	T	C	chr10-122597601-SNV-T-C	asm
chr10	122597602	122597602	SNV	G	A	chr10-122597602-SNV-G-A	asm
chr10	122597606	122597606	SNV	A	G	chr10-122597606-SNV-A-G	asm
chr10	122597611	122597611	SNV	G	T	chr10-122597611-SNV-G-T	asm
chr10	122597616	122597616	SNV	C	T	chr10-122597616-SNV-C-T	asm
chr10	122597619	122597619	SNV	T	C	chr10-122597619-SNV-T-C	asm
chr10	122597622	122597622	SNV	G	A	chr10-122597622-SNV-G-A	asm
chr10	122597624	122597624	SNV	T	G	chr10-122597624-SNV-T-G	asm
chr10	122597632	122597632	SNV	T	C	chr10-122597632-SNV-T-C	asm
chr10	122597635	122597635	SNV	G	A	chr10-122597635-SNV-G-A	asm
chr10	122597637	122597637	SNV	T	C	chr10-122597637-SNV-T-C	asm
chr10	122597638	122597638	SNV	T	C	chr10-122597638-SNV-T-C	asm
chr10	122597639	122597639	SNV	C	T	chr10-122597639-SNV-C-T	asm
chr10	122597640	122597640	SNV	C	T	chr10-122597640-SNV-C-T	asm
chr10	122597653	122597653	SNV	C	T	chr10-122597653-SNV-C-T	asm
chr10	122597656	122597656	SNV	G	A	chr10-122597656-SNV-G-A	asm
chr10	122597660	122597660	SNV	T	G	chr10-122597660-SNV-T-G	asm
chr10	122597661	122597661	SNV	A	T	chr10-122597661-SNV-A-T	asm
chr10	122597668	122597668	SNV	T	G	chr10-122597668-SNV-T-G	asm
chr10	122597669	122597669	SNV	G	C	chr10-122597669-SNV-G-C	asm
chr10	122597676	122597676	SNV	A	T	chr10-122597676-SNV-A-T	asm
chr10	122597683	122597683	SNV	T	C	chr10-122597683-SNV-T-C	asm
chr10	122597690	122597690	SNV	A	G	chr10-122597690-SNV-A-G	asm
chr10	122597694	122597694	SNV	G	A	chr10-122597694-SNV-G-A	asm
chr10	122597700	122597700	SNV	G	C	chr10-122597700-SNV-G-C	asm
chr10	122597713	122597713	SNV	C	G	chr10-122597713-SNV-C-G	asm
chr10	122597718	122597718	SNV	A	G	chr10-122597718-SNV-A-G	asm
chr10	122597719	122597719	SNV	A	G	chr10-122597719-SNV-A-G	asm
chr10	122597724	122597724	SNV	C	T	chr10-122597724-SNV-C-T	asm
chr10	122597725	122597725	SNV	T	A	chr10-122597725-SNV-T-A	asm
chr10	122597736	122597736	SNV	G	A	chr10-122597736-SNV-G-A	asm
chr10	122597737	122597737	SNV	A	G	chr10-122597737-SNV-A-G	asm
chr10	122597749	122597749	SNV	A	G	chr10-122597749-SNV-A-G	asm
chr10	122597750	122597750	SNV	C	T	chr10-122597750-SNV-C-T	asm
chr10	122597753	122597753	SNV	C	T	chr10-122597753-SNV-C-T	asm
chr10	122597780	122597780	SNV	A	G	chr10-122597780-SNV-A-G	asm
chr10	122597793	122597793	SNV	C	T	chr10-122597793-SNV-C-T	asm
chr10	122597794	122597794	SNV	A	G	chr10-122597794-SNV-A-G	asm
chr10	122597798	122597798	SNV	C	A	chr10-122597798-SNV-C-A	asm
chr10	122597804	122597804	SNV	A	T	chr10-122597804-SNV-A-T	asm
chr10	122597809	122597809	SNV	T	G	chr10-122597809-SNV-T-G	asm
chr10	122597814	122597814	SNV	A	T	chr10-122597814-SNV-A-T	asm
chr10	122597819	122597819	SNV	G	C	chr10-122597819-SNV-G-C	asm
chr10	122597827	122597827	SNV	G	A	chr10-122597827-SNV-G-A	asm
chr10	122597867	122597867	SNV	C	T	chr10-122597867-SNV-C-T	asm
chr10	122597872	122597872	SNV	G	A	chr10-122597872-SNV-G-A	asm
chr10	122597876	122597876	SNV	G	A	chr10-122597876-SNV-G-A	asm
chr10	122597877	122597877	SNV	G	A	chr10-122597877-SNV-G-A	asm
chr10	122597878	122597878	SNV	T	G	chr10-122597878-SNV-T-G	asm
chr10	122597880	122597880	SNV	G	A	chr10-122597880-SNV-G-A	asm
chr10	122597882	122597882	SNV	T	A	chr10-122597882-SNV-T-A	asm
chr10	122597892	122597892	SNV	T	C	chr10-122597892-SNV-T-C	asm
chr10	122597900	122597900	SNV	C	G	chr10-122597900-SNV-C-G	asm
chr10	122597904	122597904	SNV	G	A	chr10-122597904-SNV-G-A	asm
chr10	122597924	122597924	SNV	A	C	chr10-122597924-SNV-A-C	asm
chr10	122597930	122597930	SNV	A	T	chr10-122597930-SNV-A-T	asm
chr10	122597933	122597933	SNV	A	C	chr10-122597933-SNV-A-C	asm
chr10	122597959	122597959	SNV	C	T	chr10-122597959-SNV-C-T	asm
chr10	122597978	122597978	SNV	A	G	chr10-122597978-SNV-A-G	asm
chr10	122597982	122597982	SNV	C	T	chr10-122597982-SNV-C-T	asm
chr10	122597993	122597993	SNV	C	G	chr10-122597993-SNV-C-G	asm
chr10	122597996	122597996	SNV	G	A	chr10-122597996-SNV-G-A	asm
chr10	122598000	122598000	SNV	G	C	chr10-122598000-SNV-G-C	asm
chr10	122598020	122598020	SNV	T	A	chr10-122598020-SNV-T-A	asm
chr10	122598028	122598028	SNV	G	A	chr10-122598028-SNV-G-A	asm
chr10	122598071	122598071	SNV	T	C	chr10-122598071-SNV-T-C	asm
chr10	122598109	122598109	SNV	C	G	chr10-122598109-SNV-C-G	asm
chr10	122598119	122598119	SNV	T	C	chr10-122598119-SNV-T-C	asm
chr10	122598120	122598120	SNV	G	A	chr10-122598120-SNV-G-A	asm
chr10	122598129	122598129	SNV	G	C	chr10-122598129-SNV-G-C	asm
chr10	122598131	122598131	SNV	T	C	chr10-122598131-SNV-T-C	asm
chr10	122598134	122598134	SNV	C	A	chr10-122598134-SNV-C-A	asm
chr10	122598135	122598135	SNV	A	G	chr10-122598135-SNV-A-G	asm
chr10	122598148	122598148	SNV	A	T	chr10-122598148-SNV-A-T	asm
chr10	122598150	122598150	SNV	C	A	chr10-122598150-SNV-C-A	asm
chr10	122598162	122598162	SNV	C	A	chr10-122598162-SNV-C-A	asm
chr10	122598167	122598167	SNV	C	T	chr10-122598167-SNV-C-T	asm
chr10	122598168	122598168	SNV	T	C	chr10-122598168-SNV-T-C	asm
chr10	122598170	122598170	SNV	T	C	chr10-122598170-SNV-T-C	asm
chr10	122598176	122598176	SNV	T	G	chr10-122598176-SNV-T-G	asm
chr10	122598178	122598178	SNV	A	G	chr10-122598178-SNV-A-G	asm
chr10	122598183	122598183	SNV	G	A	chr10-122598183-SNV-G-A	asm
chr10	122598188	122598188	SNV	C	G	chr10-122598188-SNV-C-G	asm
chr10	122598198	122598198	SNV	C	T	chr10-122598198-SNV-C-T	asm
chr10	122598206	122598206	SNV	T	C	chr10-122598206-SNV-T-C	asm
chr10	122598208	122598208	SNV	G	A	chr10-122598208-SNV-G-A	asm
chr10	122598214	122598214	SNV	C	T	chr10-122598214-SNV-C-T	asm
chr10	122598217	122598217	SNV	G	T	chr10-122598217-SNV-G-T	asm
chr10	122598219	122598219	SNV	A	G	chr10-122598219-SNV-A-G	asm
chr10	122598221	122598221	SNV	T	C	chr10-122598221-SNV-T-C	asm
chr10	122598223	122598223	SNV	C	G	chr10-122598223-SNV-C-G	asm
chr10	122598235	122598235	SNV	G	A	chr10-122598235-SNV-G-A	asm
chr10	122598240	122598240	SNV	G	T	chr10-122598240-SNV-G-T	asm
chr10	122598244	122598244	SNV	C	G	chr10-122598244-SNV-C-G	asm
chr10	122598253	122598253	SNV	C	T	chr10-122598253-SNV-C-T	asm
chr10	122598267	122598267	SNV	A	C	chr10-122598267-SNV-A-C	asm
chr10	122598270	122598270	SNV	G	A	chr10-122598270-SNV-G-A	asm
chr10	122598279	122598279	SNV	G	A	chr10-122598279-SNV-G-A	asm
chr10	122598281	122598281	SNV	T	C	chr10-122598281-SNV-T-C	asm
chr10	122598293	122598293	SNV	A	C	chr10-122598293-SNV-A-C	asm
chr10	122598296	122598296	SNV	A	G	chr10-122598296-SNV-A-G	asm
chr10	122598297	122598297	SNV	A	G	chr10-122598297-SNV-A-G	asm
chr10	122598311	122598311	SNV	T	G	chr10-122598311-SNV-T-G	asm
chr10	122598314	122598314	SNV	C	T	chr10-122598314-SNV-C-T	asm
chr10	122598317	122598317	SNV	A	T	chr10-122598317-SNV-A-T	asm
chr10	122598319	122598319	SNV	C	G	chr10-122598319-SNV-C-G	asm
chr10	122598325	122598325	SNV	G	C	chr10-122598325-SNV-G-C	asm
chr10	122598326	122598326	SNV	G	A	chr10-122598326-SNV-G-A	asm
chr10	122598327	122598327	SNV	C	T	chr10-122598327-SNV-C-T	asm
chr10	122598334	122598334	SNV	G	C	chr10-122598334-SNV-G-C	asm
chr10	122598335	122598335	SNV	G	C	chr10-122598335-SNV-G-C	asm
chr10	122598339	122598339	SNV	G	C	chr10-122598339-SNV-G-C	asm
chr10	122598343	122598343	SNV	A	G	chr10-122598343-SNV-A-G	asm
chr10	122598345	122598345	SNV	T	A	chr10-122598345-SNV-T-A	asm
chr10	122598346	122598346	SNV	C	G	chr10-122598346-SNV-C-G	asm
chr10	122598351	122598351	SNV	G	A	chr10-122598351-SNV-G-A	asm
chr10	122598354	122598354	SNV	G	A	chr10-122598354-SNV-G-A	asm
chr10	122598356	122598356	SNV	G	T	chr10-122598356-SNV-G-T	asm
chr10	122598357	122598357	SNV	A	T	chr10-122598357-SNV-A-T	asm
chr10	122598365	122598365	SNV	C	T	chr10-122598365-SNV-C-T	asm
chr10	122598366	122598366	SNV	A	G	chr10-122598366-SNV-A-G	asm
chr10	122598369	122598369	SNV	C	G	chr10-122598369-SNV-C-G	asm
chr10	122598370	122598370	SNV	C	T	chr10-122598370-SNV-C-T	asm
chr10	122598382	122598382	SNV	G	T	chr10-122598382-SNV-G-T	asm
chr10	122598384	122598384	SNV	C	T	chr10-122598384-SNV-C-T	asm
chr10	122598385	122598385	SNV	C	G	chr10-122598385-SNV-C-G	asm
chr10	122598389	122598389	SNV	T	C	chr10-122598389-SNV-T-C	asm
chr10	122598393	122598393	SNV	A	C	chr10-122598393-SNV-A-C	asm
chr10	122598398	122598398	SNV	T	G	chr10-122598398-SNV-T-G	asm
chr10	122598399	122598399	SNV	G	C	chr10-122598399-SNV-G-C	asm
chr10	122598402	122598402	SNV	A	T	chr10-122598402-SNV-A-T	asm
chr10	122598405	122598405	SNV	T	G	chr10-122598405-SNV-T-G	asm
chr10	122598406	122598406	SNV	T	C	chr10-122598406-SNV-T-C	asm
chr10	122598413	122598413	SNV	T	C	chr10-122598413-SNV-T-C	asm
chr10	122598418	122598418	SNV	C	G	chr10-122598418-SNV-C-G	asm
chr10	122598420	122598420	SNV	A	G	chr10-122598420-SNV-A-G	asm
chr10	122598426	122598426	SNV	T	C	chr10-122598426-SNV-T-C	asm
chr10	122598427	122598427	SNV	A	G	chr10-122598427-SNV-A-G	asm
chr10	122598428	122598428	SNV	G	T	chr10-122598428-SNV-G-T	asm
chr10	122598430	122598430	SNV	A	G	chr10-122598430-SNV-A-G	asm
chr10	122598431	122598431	SNV	T	G	chr10-122598431-SNV-T-G	asm
chr10	122598441	122598441	SNV	G	A	chr10-122598441-SNV-G-A	asm
chr10	122598445	122598445	SNV	C	T	chr10-122598445-SNV-C-T	asm
chr10	122598449	122598449	SNV	G	C	chr10-122598449-SNV-G-C	asm
chr10	122598457	122598457	SNV	G	T	chr10-122598457-SNV-G-T	asm
chr10	122598460	122598460	SNV	T	C	chr10-122598460-SNV-T-C	asm
chr10	122598461	122598461	SNV	C	A	chr10-122598461-SNV-C-A	asm
chr10	122598471	122598471	SNV	T	C	chr10-122598471-SNV-T-C	asm
chr10	122598472	122598472	SNV	A	T	chr10-122598472-SNV-A-T	asm
chr10	122598476	122598476	SNV	T	G	chr10-122598476-SNV-T-G	asm
chr10	122598480	122598480	SNV	T	A	chr10-122598480-SNV-T-A	asm
chr10	122598484	122598484	SNV	T	G	chr10-122598484-SNV-T-G	asm
chr10	122598490	122598490	SNV	T	C	chr10-122598490-SNV-T-C	asm
chr10	122598491	122598491	SNV	G	A	chr10-122598491-SNV-G-A	asm
chr10	122598502	122598502	SNV	A	G	chr10-122598502-SNV-A-G	asm
chr10	122598504	122598504	SNV	C	T	chr10-122598504-SNV-C-T	asm
chr10	122598508	122598508	SNV	G	A	chr10-122598508-SNV-G-A	asm
chr10	122598509	122598509	SNV	T	G	chr10-122598509-SNV-T-G	asm
chr10	122598516	122598516	SNV	A	G	chr10-122598516-SNV-A-G	asm
chr10	122598523	122598523	SNV	T	G	chr10-122598523-SNV-T-G	asm
chr10	122598535	122598535	SNV	T	C	chr10-122598535-SNV-T-C	asm
chr10	122598537	122598537	SNV	A	C	chr10-122598537-SNV-A-C	asm
chr10	122598540	122598540	SNV	T	C	chr10-122598540-SNV-T-C	asm
chr10	122598543	122598543	SNV	G	C	chr10-122598543-SNV-G-C	asm
chr10	122598545	122598545	SNV	A	G	chr10-122598545-SNV-A-G	asm
chr10	122598555	122598555	SNV	A	G	chr10-122598555-SNV-A-G	asm
chr10	122598556	122598556	SNV	T	C	chr10-122598556-SNV-T-C	asm
chr10	122598561	122598561	SNV	C	T	chr10-122598561-SNV-C-T	asm
chr10	122598569	122598569	SNV	C	T	chr10-122598569-SNV-C-T	asm
chr10	122598570	122598570	SNV	T	C	chr10-122598570-SNV-T-C	asm
chr10	122598578	122598578	SNV	T	C	chr10-122598578-SNV-T-C	asm
chr10	122598602	122598602	SNV	G	A	chr10-122598602-SNV-G-A	asm
chr10	122598607	122598607	SNV	T	C	chr10-122598607-SNV-T-C	asm
chr10	122598608	122598608	SNV	G	T	chr10-122598608-SNV-G-T	asm
chr10	122598611	122598611	SNV	T	C	chr10-122598611-SNV-T-C	asm
chr10	122598615	122598615	SNV	T	C	chr10-122598615-SNV-T-C	asm
chr10	122598616	122598616	SNV	G	C	chr10-122598616-SNV-G-C	asm
chr10	122598618	122598618	SNV	C	G	chr10-122598618-SNV-C-G	asm
chr10	122598620	122598620	SNV	T	A	chr10-122598620-SNV-T-A	asm
chr10	122598634	122598634	SNV	T	C	chr10-122598634-SNV-T-C	asm
chr10	122598640	122598640	SNV	A	G	chr10-122598640-SNV-A-G	asm
chr10	122598643	122598643	SNV	T	G	chr10-122598643-SNV-T-G	asm
chr10	122598644	122598644	SNV	T	C	chr10-122598644-SNV-T-C	asm
chr10	122598646	122598646	SNV	T	G	chr10-122598646-SNV-T-G	asm
chr10	122598649	122598649	SNV	A	G	chr10-122598649-SNV-A-G	asm
chr10	122598657	122598657	SNV	A	T	chr10-122598657-SNV-A-T	asm
chr10	122598658	122598658	SNV	G	C	chr10-122598658-SNV-G-C	asm
chr10	122598667	122598667	SNV	C	T	chr10-122598667-SNV-C-T	asm
chr10	122598670	122598670	SNV	C	T	chr10-122598670-SNV-C-T	asm
chr10	122598676	122598676	SNV	T	C	chr10-122598676-SNV-T-C	asm
chr10	122598680	122598680	SNV	T	C	chr10-122598680-SNV-T-C	asm
chr10	122598683	122598683	SNV	A	G	chr10-122598683-SNV-A-G	asm
chr10	122598694	122598694	SNV	C	A	chr10-122598694-SNV-C-A	asm
chr10	122598695	122598695	SNV	A	G	chr10-122598695-SNV-A-G	asm
chr10	122598697	122598697	SNV	G	A	chr10-122598697-SNV-G-A	asm
chr10	122598700	122598700	SNV	T	C	chr10-122598700-SNV-T-C	asm
chr10	122598713	122598713	SNV	A	G	chr10-122598713-SNV-A-G	asm
chr10	122598715	122598715	SNV	T	G	chr10-122598715-SNV-T-G	asm
chr10	122598728	122598728	SNV	G	T	chr10-122598728-SNV-G-T	asm
chr10	122598737	122598737	SNV	A	G	chr10-122598737-SNV-A-G	asm
chr10	122598749	122598749	SNV	G	A	chr10-122598749-SNV-G-A	asm
chr10	122601814	122601814	SNV	G	A	chr10-122601814-SNV-G-A	asm
chr10	122601835	122601835	SNV	G	A	chr10-122601835-SNV-G-A	asm
chr10	122601858	122601858	SNV	G	A	chr10-122601858-SNV-G-A	asm
chr10	122601901	122601901	SNV	T	A	chr10-122601901-SNV-T-A	asm
chr10	122601902	122601902	SNV	A	G	chr10-122601902-SNV-A-G	asm
chr10	122601909	122601909	SNV	C	T	chr10-122601909-SNV-C-T	asm
chr10	122601930	122601930	SNV	T	C	chr10-122601930-SNV-T-C	asm
chr10	122601959	122601959	SNV	T	C	chr10-122601959-SNV-T-C	asm
chr10	122601963	122601963	SNV	A	G	chr10-122601963-SNV-A-G	asm
chr10	122601993	122601993	SNV	T	C	chr10-122601993-SNV-T-C	asm
chr10	122602008	122602008	SNV	C	T	chr10-122602008-SNV-C-T	asm
chr10	122602035	122602035	SNV	T	C	chr10-122602035-SNV-T-C	asm
chr10	122602044	122602044	SNV	T	C	chr10-122602044-SNV-T-C	asm
chr10	122602101	122602101	SNV	C	T	chr10-122602101-SNV-C-T	asm
chr10	122602139	122602139	SNV	C	G	chr10-122602139-SNV-C-G	asm
chr10	122602155	122602155	SNV	G	A	chr10-122602155-SNV-G-A	asm
chr10	122602156	122602156	SNV	T	C	chr10-122602156-SNV-T-C	asm
chr10	122602192	122602192	SNV	A	C	chr10-122602192-SNV-A-C	asm
chr10	122602211	122602211	SNV	C	A	chr10-122602211-SNV-C-A	asm
chr10	122602229	122602229	SNV	T	C	chr10-122602229-SNV-T-C	asm
chr10	122602231	122602231	SNV	G	A	chr10-122602231-SNV-G-A	asm
chr10	122602240	122602240	SNV	C	T	chr10-122602240-SNV-C-T	asm
chr10	122602255	122602255	SNV	C	T	chr10-122602255-SNV-C-T	asm
chr10	122602264	122602264	SNV	A	G	chr10-122602264-SNV-A-G	asm
chr10	122602280	122602280	SNV	G	A	chr10-122602280-SNV-G-A	asm
chr10	122602287	122602287	SNV	C	G	chr10-122602287-SNV-C-G	asm
chr10	122602289	122602289	SNV	G	C	chr10-122602289-SNV-G-C	asm
chr10	122602299	122602299	SNV	A	C	chr10-122602299-SNV-A-C	asm
chr10	122602320	122602320	SNV	G	C	chr10-122602320-SNV-G-C	asm
chr10	122602321	122602321	SNV	A	C	chr10-122602321-SNV-A-C	asm
chr10	122602327	122602327	SNV	G	C	chr10-122602327-SNV-G-C	asm
chr10	122602329	122602329	SNV	C	G	chr10-122602329-SNV-C-G	asm
chr10	122602373	122602373	SNV	G	A	chr10-122602373-SNV-G-A	asm
chr10	122602381	122602381	SNV	A	C	chr10-122602381-SNV-A-C	asm
chr10	122602409	122602409	SNV	C	T	chr10-122602409-SNV-C-T	asm
chr10	122602419	122602419	SNV	T	C	chr10-122602419-SNV-T-C	asm
chr10	122602421	122602421	SNV	C	T	chr10-122602421-SNV-C-T	asm
chr10	122602423	122602423	SNV	T	A	chr10-122602423-SNV-T-A	asm
chr10	122602435	122602435	SNV	G	C	chr10-122602435-SNV-G-C	asm
chr10	122602439	122602439	SNV	T	G	chr10-122602439-SNV-T-G	asm
chr10	122602470	122602470	SNV	G	A	chr10-122602470-SNV-G-A	asm
chr10	122602471	122602471	SNV	G	A	chr10-122602471-SNV-G-A	asm
chr10	122602474	122602474	SNV	C	T	chr10-122602474-SNV-C-T	asm
chr10	122602477	122602477	SNV	A	G	chr10-122602477-SNV-A-G	asm
chr10	122602483	122602483	SNV	G	A	chr10-122602483-SNV-G-A	asm
chr10	122602496	122602496	SNV	T	A	chr10-122602496-SNV-T-A	asm
chr10	122602509	122602509	SNV	A	G	chr10-122602509-SNV-A-G	asm
chr10	122602511	122602511	SNV	C	T	chr10-122602511-SNV-C-T	asm
chr10	122602527	122602527	SNV	G	A	chr10-122602527-SNV-G-A	asm
chr10	122602533	122602533	SNV	G	A	chr10-122602533-SNV-G-A	asm
chr10	122602569	122602569	SNV	C	T	chr10-122602569-SNV-C-T	asm
chr10	122602723	122602723	SNV	T	A	chr10-122602723-SNV-T-A	asm
chr10	122602732	122602732	SNV	T	A	chr10-122602732-SNV-T-A	asm
chr10	122602739	122602739	SNV	C	T	chr10-122602739-SNV-C-T	asm
chr10	122602740	122602740	SNV	A	G	chr10-122602740-SNV-A-G	asm
chr10	122602824	122602824	SNV	T	C	chr10-122602824-SNV-T-C	asm
chr10	122602861	122602861	SNV	T	C	chr10-122602861-SNV-T-C	asm
chr10	122602873	122602873	SNV	C	G	chr10-122602873-SNV-C-G	asm
chr10	122602891	122602891	SNV	T	A	chr10-122602891-SNV-T-A	asm
chr10	122602927	122602927	SNV	A	G	chr10-122602927-SNV-A-G	asm
chr10	122603019	122603019	SNV	C	T	chr10-122603019-SNV-C-T	asm
chr10	122603037	122603037	SNV	A	G	chr10-122603037-SNV-A-G	asm
chr10	122603049	122603049	SNV	T	C	chr10-122603049-SNV-T-C	asm
chr10	122603064	122603064	SNV	C	T	chr10-122603064-SNV-C-T	asm
chr10	122603065	122603065	SNV	A	G	chr10-122603065-SNV-A-G	asm
chr10	122603100	122603100	SNV	C	T	chr10-122603100-SNV-C-T	asm
chr10	122603112	122603112	SNV	A	G	chr10-122603112-SNV-A-G	asm
chr10	122603125	122603125	SNV	C	T	chr10-122603125-SNV-C-T	asm
chr10	122603133	122603133	SNV	A	G	chr10-122603133-SNV-A-G	asm
chr10	122603136	122603136	SNV	T	C	chr10-122603136-SNV-T-C	asm
chr10	122603190	122603190	SNV	C	A	chr10-122603190-SNV-C-A	asm
chr10	122603246	122603246	SNV	T	C	chr10-122603246-SNV-T-C	asm
chr10	122603250	122603250	SNV	G	C	chr10-122603250-SNV-G-C	asm
chr10	122603254	122603254	SNV	C	A	chr10-122603254-SNV-C-A	asm
chr10	122603265	122603265	SNV	A	G	chr10-122603265-SNV-A-G	asm
chr10	122603267	122603267	SNV	T	A	chr10-122603267-SNV-T-A	asm
chr10	122603268	122603268	SNV	T	A	chr10-122603268-SNV-T-A	asm
chr10	122603270	122603270	SNV	A	T	chr10-122603270-SNV-A-T	asm
chr10	122603271	122603271	SNV	C	G	chr10-122603271-SNV-C-G	asm
chr10	122604296	122604296	SNV	C	G	chr10-122604296-SNV-C-G	asm
chr10	122604298	122604298	SNV	A	C	chr10-122604298-SNV-A-C	asm
chr10	122604300	122604300	SNV	A	C	chr10-122604300-SNV-A-C	asm
chr10	122604309	122604309	SNV	T	C	chr10-122604309-SNV-T-C	asm
chr10	122604315	122604315	SNV	G	T	chr10-122604315-SNV-G-T	asm
chr10	122604316	122604316	SNV	A	T	chr10-122604316-SNV-A-T	asm
chr10	122604326	122604326	SNV	T	C	chr10-122604326-SNV-T-C	asm
chr10	122604333	122604333	SNV	C	G	chr10-122604333-SNV-C-G	asm
chr10	122604404	122604404	SNV	G	A	chr10-122604404-SNV-G-A	asm
chr10	122604443	122604443	SNV	T	C	chr10-122604443-SNV-T-C	asm
chr10	122604462	122604462	SNV	A	C	chr10-122604462-SNV-A-C	asm
chr10	122604508	122604508	SNV	T	C	chr10-122604508-SNV-T-C	asm
chr10	122604520	122604520	SNV	T	C	chr10-122604520-SNV-T-C	asm
chr10	122604562	122604562	SNV	A	C	chr10-122604562-SNV-A-C	asm
chr10	122604567	122604567	SNV	T	C	chr10-122604567-SNV-T-C	asm
chr10	122604580	122604580	SNV	G	T	chr10-122604580-SNV-G-T	asm
chr10	122604581	122604581	SNV	A	C	chr10-122604581-SNV-A-C	asm
chr10	122604583	122604583	SNV	C	G	chr10-122604583-SNV-C-G	asm
chr10	122604585	122604585	SNV	C	G	chr10-122604585-SNV-C-G	asm
chr10	122604590	122604590	SNV	G	C	chr10-122604590-SNV-G-C	asm
chr10	122604607	122604607	SNV	G	A	chr10-122604607-SNV-G-A	asm
chr10	122604617	122604617	SNV	T	C	chr10-122604617-SNV-T-C	asm
chr10	122604627	122604627	SNV	A	G	chr10-122604627-SNV-A-G	asm
chr10	122604647	122604647	SNV	A	G	chr10-122604647-SNV-A-G	asm
chr10	122604648	122604648	SNV	G	A	chr10-122604648-SNV-G-A	asm
chr10	122604661	122604661	SNV	G	A	chr10-122604661-SNV-G-A	asm
chr10	122604719	122604719	SNV	T	C	chr10-122604719-SNV-T-C	asm
chr10	122604723	122604723	SNV	C	G	chr10-122604723-SNV-C-G	asm
chr10	122604731	122604731	SNV	T	C	chr10-122604731-SNV-T-C	asm
chr10	122604748	122604748	SNV	A	G	chr10-122604748-SNV-A-G	asm
chr10	122604790	122604790	SNV	T	G	chr10-122604790-SNV-T-G	asm
chr10	122604881	122604881	SNV	T	C	chr10-122604881-SNV-T-C	asm
chr10	122604883	122604883	SNV	A	C	chr10-122604883-SNV-A-C	asm
chr10	122604901	122604901	SNV	G	C	chr10-122604901-SNV-G-C	asm
chr10	122604928	122604928	SNV	G	A	chr10-122604928-SNV-G-A	asm
chr10	122604932	122604932	SNV	G	A	chr10-122604932-SNV-G-A	asm
chr10	122604944	122604944	SNV	G	A	chr10-122604944-SNV-G-A	asm
chr10	122604960	122604960	SNV	C	T	chr10-122604960-SNV-C-T	asm
chr10	122604963	122604963	SNV	G	C	chr10-122604963-SNV-G-C	asm
chr10	122604966	122604966	SNV	G	T	chr10-122604966-SNV-G-T	asm
chr10	122604973	122604973	SNV	C	T	chr10-122604973-SNV-C-T	asm
chr10	122604985	122604985	SNV	A	T	chr10-122604985-SNV-A-T	asm
chr10	122604998	122604998	SNV	C	T	chr10-122604998-SNV-C-T	asm
chr10	122604999	122604999	SNV	A	G	chr10-122604999-SNV-A-G	asm
chr10	122605051	122605051	SNV	C	T	chr10-122605051-SNV-C-T	asm
chr10	122605060	122605060	SNV	A	G	chr10-122605060-SNV-A-G	asm
chr10	122605091	122605091	SNV	T	C	chr10-122605091-SNV-T-C	asm
chr10	122605111	122605111	SNV	G	A	chr10-122605111-SNV-G-A	asm
chr10	122605118	122605118	SNV	G	A	chr10-122605118-SNV-G-A	asm
chr10	122605164	122605164	SNV	G	T	chr10-122605164-SNV-G-T	asm
chr10	122605171	122605171	SNV	C	T	chr10-122605171-SNV-C-T	asm
chr10	122605172	122605172	SNV	C	T	chr10-122605172-SNV-C-T	asm
chr10	122605177	122605177	SNV	T	G	chr10-122605177-SNV-T-G	asm
chr10	122605184	122605184	SNV	C	T	chr10-122605184-SNV-C-T	asm
chr10	122605185	122605185	SNV	T	G	chr10-122605185-SNV-T-G	asm
chr10	122605186	122605186	SNV	C	T	chr10-122605186-SNV-C-T	asm
chr10	122605233	122605233	SNV	G	C	chr10-122605233-SNV-G-C	asm
chr10	122605254	122605254	SNV	T	C	chr10-122605254-SNV-T-C	asm
chr10	122605263	122605263	SNV	C	T	chr10-122605263-SNV-C-T	asm
chr10	122605331	122605331	SNV	T	C	chr10-122605331-SNV-T-C	asm
chr10	122605354	122605354	SNV	C	G	chr10-122605354-SNV-C-G	asm
chr10	122605357	122605357	SNV	A	G	chr10-122605357-SNV-A-G	asm
chr10	122605368	122605368	SNV	G	A	chr10-122605368-SNV-G-A	asm
chr10	122605398	122605398	SNV	T	C	chr10-122605398-SNV-T-C	asm
chr10	122605410	122605410	SNV	A	G	chr10-122605410-SNV-A-G	asm
chr10	122605423	122605423	SNV	A	G	chr10-122605423-SNV-A-G	asm
chr10	122605427	122605427	SNV	T	C	chr10-122605427-SNV-T-C	asm
chr10	122605434	122605434	SNV	T	C	chr10-122605434-SNV-T-C	asm
chr10	122605448	122605448	SNV	T	C	chr10-122605448-SNV-T-C	asm
chr10	122605466	122605466	SNV	A	T	chr10-122605466-SNV-A-T	asm
chr10	122605486	122605486	SNV	A	C	chr10-122605486-SNV-A-C	asm
chr10	122605503	122605503	SNV	G	A	chr10-122605503-SNV-G-A	asm
chr10	122605515	122605515	SNV	T	A	chr10-122605515-SNV-T-A	asm
chr10	122605516	122605516	SNV	C	T	chr10-122605516-SNV-C-T	asm
chr10	122605528	122605528	SNV	G	A	chr10-122605528-SNV-G-A	asm
chr10	122605532	122605532	SNV	T	C	chr10-122605532-SNV-T-C	asm
chr10	122605552	122605552	SNV	T	G	chr10-122605552-SNV-T-G	asm
chr10	122605562	122605562	SNV	T	G	chr10-122605562-SNV-T-G	asm
chr10	122605566	122605566	SNV	G	T	chr10-122605566-SNV-G-T	asm
chr10	122605567	122605567	SNV	T	C	chr10-122605567-SNV-T-C	asm
chr10	122605582	122605582	SNV	A	G	chr10-122605582-SNV-A-G	asm
chr10	122605603	122605603	SNV	C	T	chr10-122605603-SNV-C-T	asm
chr10	122605688	122605688	SNV	A	C	chr10-122605688-SNV-A-C	asm
chr10	122605692	122605692	SNV	T	C	chr10-122605692-SNV-T-C	asm
chr10	122605711	122605711	SNV	T	C	chr10-122605711-SNV-T-C	asm
chr10	122605716	122605716	SNV	T	G	chr10-122605716-SNV-T-G	asm
chr10	122605721	122605721	SNV	C	T	chr10-122605721-SNV-C-T	asm
chr10	122605722	122605722	SNV	A	G	chr10-122605722-SNV-A-G	asm
chr10	122605730	122605730	SNV	A	G	chr10-122605730-SNV-A-G	asm
chr10	122605752	122605752	SNV	C	T	chr10-122605752-SNV-C-T	asm
chr10	122605758	122605758	SNV	G	C	chr10-122605758-SNV-G-C	asm
chr10	122605774	122605774	SNV	G	T	chr10-122605774-SNV-G-T	asm
chr10	122605779	122605779	SNV	C	T	chr10-122605779-SNV-C-T	asm
chr10	122605788	122605788	SNV	T	G	chr10-122605788-SNV-T-G	asm
chr10	122605804	122605804	SNV	A	T	chr10-122605804-SNV-A-T	asm
chr10	122605810	122605810	SNV	G	C	chr10-122605810-SNV-G-C	asm
chr10	122605817	122605817	SNV	T	G	chr10-122605817-SNV-T-G	asm
chr10	122605819	122605819	SNV	T	A	chr10-122605819-SNV-T-A	asm
chr10	122605821	122605821	SNV	T	G	chr10-122605821-SNV-T-G	asm
chr10	122605835	122605835	SNV	C	G	chr10-122605835-SNV-C-G	asm
chr10	122605836	122605836	SNV	G	A	chr10-122605836-SNV-G-A	asm
chr10	122605858	122605858	SNV	T	C	chr10-122605858-SNV-T-C	asm
chr10	122605959	122605959	SNV	C	T	chr10-122605959-SNV-C-T	asm
chr10	122605960	122605960	SNV	T	A	chr10-122605960-SNV-T-A	asm
chr10	122605961	122605961	SNV	A	G	chr10-122605961-SNV-A-G	asm
chr10	122605973	122605973	SNV	A	G	chr10-122605973-SNV-A-G	asm
chr10	122605977	122605977	SNV	T	C	chr10-122605977-SNV-T-C	asm
chr10	122605989	122605989	SNV	T	C	chr10-122605989-SNV-T-C	asm
chr10	122605993	122605993	SNV	A	C	chr10-122605993-SNV-A-C	asm
chr10	122606094	122606094	SNV	T	C	chr10-122606094-SNV-T-C	asm
chr10	122606100	122606100	SNV	C	T	chr10-122606100-SNV-C-T	asm
chr10	122606103	122606103	SNV	T	C	chr10-122606103-SNV-T-C	asm
chr10	122606152	122606152	SNV	C	A	chr10-122606152-SNV-C-A	asm
chr10	122606153	122606153	SNV	A	G	chr10-122606153-SNV-A-G	asm
chr10	122606188	122606188	SNV	C	T	chr10-122606188-SNV-C-T	asm
chr10	122606194	122606194	SNV	C	A	chr10-122606194-SNV-C-A	asm
chr10	122606198	122606198	SNV	C	G	chr10-122606198-SNV-C-G	asm
chr10	122606201	122606201	SNV	C	A	chr10-122606201-SNV-C-A	asm
chr10	122606204	122606204	SNV	C	A	chr10-122606204-SNV-C-A	asm
chr10	122606210	122606210	SNV	C	T	chr10-122606210-SNV-C-T	asm
chr10	122606212	122606212	SNV	A	G	chr10-122606212-SNV-A-G	asm
chr10	122606215	122606215	SNV	T	G	chr10-122606215-SNV-T-G	asm
chr10	122606228	122606228	SNV	A	C	chr10-122606228-SNV-A-C	asm
chr10	122606229	122606229	SNV	G	A	chr10-122606229-SNV-G-A	asm
chr10	122606237	122606237	SNV	A	C	chr10-122606237-SNV-A-C	asm
chr10	122606251	122606251	SNV	A	C	chr10-122606251-SNV-A-C	asm
chr10	122606270	122606270	SNV	C	A	chr10-122606270-SNV-C-A	asm
chr10	122606273	122606273	SNV	A	C	chr10-122606273-SNV-A-C	asm
chr10	122606287	122606287	SNV	C	T	chr10-122606287-SNV-C-T	asm
chr10	122606288	122606288	SNV	T	C	chr10-122606288-SNV-T-C	asm
chr10	122606290	122606290	SNV	G	A	chr10-122606290-SNV-G-A	asm
chr10	122606296	122606296	SNV	A	C	chr10-122606296-SNV-A-C	asm
chr10	122606299	122606299	SNV	C	A	chr10-122606299-SNV-C-A	asm
chr10	122606302	122606302	SNV	C	A	chr10-122606302-SNV-C-A	asm
chr10	122606314	122606314	SNV	C	T	chr10-122606314-SNV-C-T	asm
chr10	122606327	122606327	SNV	T	C	chr10-122606327-SNV-T-C	asm
chr10	122606328	122606328	SNV	G	C	chr10-122606328-SNV-G-C	asm
chr10	122606333	122606333	SNV	A	T	chr10-122606333-SNV-A-T	asm
chr10	122606335	122606335	SNV	T	C	chr10-122606335-SNV-T-C	asm
chr10	122606344	122606344	SNV	A	T	chr10-122606344-SNV-A-T	asm
chr10	122606349	122606349	SNV	T	C	chr10-122606349-SNV-T-C	asm
chr10	122606351	122606351	SNV	G	A	chr10-122606351-SNV-G-A	asm
chr10	122606358	122606358	SNV	A	C	chr10-122606358-SNV-A-C	asm
chr10	122606386	122606386	SNV	G	C	chr10-122606386-SNV-G-C	asm
chr10	122606404	122606404	SNV	C	G	chr10-122606404-SNV-C-G	asm
chr10	122606408	122606408	SNV	A	T	chr10-122606408-SNV-A-T	asm
chr10	122606423	122606423	SNV	C	G	chr10-122606423-SNV-C-G	asm
chr10	122606425	122606425	SNV	G	A	chr10-122606425-SNV-G-A	asm
chr10	122606426	122606426	SNV	T	G	chr10-122606426-SNV-T-G	asm
chr10	122606451	122606451	SNV	C	G	chr10-122606451-SNV-C-G	asm
chr10	122606478	122606478	SNV	T	C	chr10-122606478-SNV-T-C	asm
chr10	122606494	122606494	SNV	G	C	chr10-122606494-SNV-G-C	asm
chr10	122606495	122606495	SNV	T	G	chr10-122606495-SNV-T-G	asm
chr10	122606497	122606497	SNV	G	T	chr10-122606497-SNV-G-T	asm
chr10	122606498	122606498	SNV	T	G	chr10-122606498-SNV-T-G	asm
chr10	122606508	122606508	SNV	C	A	chr10-122606508-SNV-C-A	asm
chr10	122606514	122606514	SNV	C	T	chr10-122606514-SNV-C-T	asm
chr10	122606515	122606515	SNV	A	G	chr10-122606515-SNV-A-G	asm
chr10	122606516	122606516	SNV	T	C	chr10-122606516-SNV-T-C	asm
chr10	122606529	122606529	SNV	G	A	chr10-122606529-SNV-G-A	asm
chr10	122606530	122606530	SNV	G	A	chr10-122606530-SNV-G-A	asm
chr10	122606534	122606534	SNV	A	G	chr10-122606534-SNV-A-G	asm
chr10	122606536	122606536	SNV	A	G	chr10-122606536-SNV-A-G	asm
chr10	122606538	122606538	SNV	G	T	chr10-122606538-SNV-G-T	asm
chr10	122606570	122606570	SNV	C	T	chr10-122606570-SNV-C-T	asm
chr10	122606586	122606586	SNV	G	A	chr10-122606586-SNV-G-A	asm
chr10	122606628	122606628	SNV	C	T	chr10-122606628-SNV-C-T	asm
chr10	122606666	122606666	SNV	G	A	chr10-122606666-SNV-G-A	asm
chr10	122606675	122606675	SNV	G	C	chr10-122606675-SNV-G-C	asm
chr10	122606723	122606723	SNV	A	T	chr10-122606723-SNV-A-T	asm
chr10	122606725	122606725	SNV	G	A	chr10-122606725-SNV-G-A	asm
chr10	122606730	122606730	SNV	A	T	chr10-122606730-SNV-A-T	asm
chr10	122606736	122606736	SNV	C	T	chr10-122606736-SNV-C-T	asm
chr10	122606747	122606747	SNV	T	C	chr10-122606747-SNV-T-C	asm
chr10	122606748	122606748	SNV	G	A	chr10-122606748-SNV-G-A	asm
chr10	122606780	122606780	SNV	A	G	chr10-122606780-SNV-A-G	asm
chr10	122606782	122606782	SNV	T	C	chr10-122606782-SNV-T-C	asm
chr10	122606791	122606791	SNV	T	A	chr10-122606791-SNV-T-A	asm
chr10	122606798	122606798	SNV	C	T	chr10-122606798-SNV-C-T	asm
chr10	122606799	122606799	SNV	A	G	chr10-122606799-SNV-A-G	asm
chr10	122606801	122606801	SNV	T	C	chr10-122606801-SNV-T-C	asm
chr10	122606812	122606812	SNV	G	A	chr10-122606812-SNV-G-A	asm
chr10	122606815	122606815	SNV	G	A	chr10-122606815-SNV-G-A	asm
chr10	122606824	122606824	SNV	A	G	chr10-122606824-SNV-A-G	asm
chr10	122606827	122606827	SNV	T	C	chr10-122606827-SNV-T-C	asm
chr10	122606828	122606828	SNV	C	G	chr10-122606828-SNV-C-G	asm
chr10	122606829	122606829	SNV	A	G	chr10-122606829-SNV-A-G	asm
chr10	122606876	122606876	SNV	G	A	chr10-122606876-SNV-G-A	asm
chr10	122606880	122606880	SNV	C	T	chr10-122606880-SNV-C-T	asm
chr10	122606881	122606881	SNV	A	G	chr10-122606881-SNV-A-G	asm
chr10	122606889	122606889	SNV	T	C	chr10-122606889-SNV-T-C	asm
chr10	122606901	122606901	SNV	T	A	chr10-122606901-SNV-T-A	asm
chr10	122606915	122606915	SNV	T	C	chr10-122606915-SNV-T-C	asm
chr10	122606920	122606920	SNV	T	C	chr10-122606920-SNV-T-C	asm
chr10	122606932	122606932	SNV	C	G	chr10-122606932-SNV-C-G	asm
chr10	122606943	122606943	SNV	T	G	chr10-122606943-SNV-T-G	asm
chr10	122606950	122606950	SNV	T	A	chr10-122606950-SNV-T-A	asm
chr10	122606986	122606986	SNV	A	G	chr10-122606986-SNV-A-G	asm
chr10	122606997	122606997	SNV	C	T	chr10-122606997-SNV-C-T	asm
chr10	122607030	122607030	SNV	T	C	chr10-122607030-SNV-T-C	asm
chr10	122607318	122607318	SNV	G	A	chr10-122607318-SNV-G-A	asm
chr10	122607320	122607320	SNV	C	T	chr10-122607320-SNV-C-T	asm
chr10	122607324	122607324	SNV	A	G	chr10-122607324-SNV-A-G	asm
chr10	122607326	122607326	SNV	T	A	chr10-122607326-SNV-T-A	asm
chr10	122607327	122607327	SNV	T	A	chr10-122607327-SNV-T-A	asm
chr10	122607329	122607329	SNV	A	T	chr10-122607329-SNV-A-T	asm
chr10	122607330	122607330	SNV	C	G	chr10-122607330-SNV-C-G	asm
chr10	122608368	122608368	SNV	T	C	chr10-122608368-SNV-T-C	asm
chr10	122608374	122608374	SNV	G	T	chr10-122608374-SNV-G-T	asm
chr10	122608375	122608375	SNV	A	T	chr10-122608375-SNV-A-T	asm
chr10	122608385	122608385	SNV	T	C	chr10-122608385-SNV-T-C	asm
chr10	122608392	122608392	SNV	C	G	chr10-122608392-SNV-C-G	asm
chr11	4239805	4239805	SNV	T	G	chr11-4239805-SNV-T-G	asm
chr11	72802124	72802124	SNV	A	C	chr11-72802124-SNV-A-C	asm
chr11	72802125	72802125	SNV	A	C	chr11-72802125-SNV-A-C	asm
chr11	82469356	82469356	SNV	C	A	chr11-82469356-SNV-C-A	asm
chr11	82469357	82469357	SNV	A	C	chr11-82469357-SNV-A-C	asm
chr11	82469359	82469359	SNV	C	A	chr11-82469359-SNV-C-A	asm
chr11	83849764	83849764	SNV	T	A	chr11-83849764-SNV-T-A	asm
chr11	83849765	83849765	SNV	T	A	chr11-83849765-SNV-T-A	asm
chr11	87064962	87064962	SNV	T	C	chr11-87064962-SNV-T-C	asm
chr11	89833137	89833137	SNV	C	T	chr11-89833137-SNV-C-T	asm
chr11	89834857	89834857	SNV	A	G	chr11-89834857-SNV-A-G	asm
chr11	90045146	90045146	SNV	G	A	chr11-90045146-SNV-G-A	asm
chr11	90045148	90045148	SNV	T	C	chr11-90045148-SNV-T-C	asm
chr11	90045151	90045151	SNV	C	G	chr11-90045151-SNV-C-G	asm
chr11	90045184	90045184	SNV	T	C	chr11-90045184-SNV-T-C	asm
chr11	90045791	90045791	SNV	G	C	chr11-90045791-SNV-G-C	asm
chr11	90045806	90045806	SNV	T	A	chr11-90045806-SNV-T-A	asm
chr11	90045821	90045821	SNV	G	T	chr11-90045821-SNV-G-T	asm
chr11	90045832	90045832	SNV	C	A	chr11-90045832-SNV-C-A	asm
chr11	90045989	90045989	SNV	A	G	chr11-90045989-SNV-A-G	asm
chr11	90046040	90046040	SNV	C	T	chr11-90046040-SNV-C-T	asm
chr11	90046068	90046068	SNV	A	G	chr11-90046068-SNV-A-G	asm
chr11	90046198	90046198	SNV	C	T	chr11-90046198-SNV-C-T	asm
chr11	90046220	90046220	SNV	G	A	chr11-90046220-SNV-G-A	asm
chr11	90046403	90046403	SNV	T	C	chr11-90046403-SNV-T-C	asm
chr11	90046553	90046553	SNV	G	A	chr11-90046553-SNV-G-A	asm
chr11	90046736	90046736	SNV	T	C	chr11-90046736-SNV-T-C	asm
chr11	90046924	90046924	SNV	T	C	chr11-90046924-SNV-T-C	asm
chr11	90046955	90046955	SNV	G	C	chr11-90046955-SNV-G-C	asm
chr11	90046960	90046960	SNV	G	A	chr11-90046960-SNV-G-A	asm
chr11	90047117	90047117	SNV	A	G	chr11-90047117-SNV-A-G	asm
chr11	90047518	90047518	SNV	T	C	chr11-90047518-SNV-T-C	asm
chr11	90047905	90047905	SNV	A	G	chr11-90047905-SNV-A-G	asm
chr11	90047950	90047950	SNV	G	T	chr11-90047950-SNV-G-T	asm
chr11	90048334	90048334	SNV	T	A	chr11-90048334-SNV-T-A	asm
chr11	90048376	90048376	SNV	T	A	chr11-90048376-SNV-T-A	asm
chr11	90048641	90048641	SNV	C	A	chr11-90048641-SNV-C-A	asm
chr11	90048741	90048741	SNV	T	C	chr11-90048741-SNV-T-C	asm
chr11	90048792	90048792	SNV	T	C	chr11-90048792-SNV-T-C	asm
chr11	90049010	90049010	SNV	G	T	chr11-90049010-SNV-G-T	asm
chr11	90049039	90049039	SNV	G	A	chr11-90049039-SNV-G-A	asm
chr11	90049116	90049116	SNV	C	T	chr11-90049116-SNV-C-T	asm
chr11	90049142	90049142	SNV	G	A	chr11-90049142-SNV-G-A	asm
chr11	90049821	90049821	SNV	T	C	chr11-90049821-SNV-T-C	asm
chr11	90049964	90049964	SNV	T	C	chr11-90049964-SNV-T-C	asm
chr11	90049993	90049993	SNV	T	C	chr11-90049993-SNV-T-C	asm
chr11	90050028	90050028	SNV	A	G	chr11-90050028-SNV-A-G	asm
chr11	90050821	90050821	SNV	G	A	chr11-90050821-SNV-G-A	asm
chr11	90050902	90050902	SNV	C	T	chr11-90050902-SNV-C-T	asm
chr11	90051390	90051390	SNV	T	A	chr11-90051390-SNV-T-A	asm
chr11	90051500	90051500	SNV	G	A	chr11-90051500-SNV-G-A	asm
chr11	90051674	90051674	SNV	T	C	chr11-90051674-SNV-T-C	asm
chr11	90051733	90051733	SNV	T	C	chr11-90051733-SNV-T-C	asm
chr11	90051765	90051765	SNV	G	T	chr11-90051765-SNV-G-T	asm
chr11	90051771	90051771	SNV	A	T	chr11-90051771-SNV-A-T	asm
chr11	90051958	90051958	SNV	T	C	chr11-90051958-SNV-T-C	asm
chr11	90051998	90051998	SNV	C	G	chr11-90051998-SNV-C-G	asm
chr11	90052117	90052117	SNV	A	G	chr11-90052117-SNV-A-G	asm
chr11	90052250	90052250	SNV	C	T	chr11-90052250-SNV-C-T	asm
chr11	90052449	90052449	SNV	C	T	chr11-90052449-SNV-C-T	asm
chr11	90052479	90052479	SNV	C	A	chr11-90052479-SNV-C-A	asm
chr11	90052496	90052496	SNV	T	C	chr11-90052496-SNV-T-C	asm
chr11	90052522	90052522	SNV	T	C	chr11-90052522-SNV-T-C	asm
chr11	90052525	90052525	SNV	G	C	chr11-90052525-SNV-G-C	asm
chr11	90052857	90052857	SNV	T	C	chr11-90052857-SNV-T-C	asm
chr11	90052859	90052859	SNV	A	G	chr11-90052859-SNV-A-G	asm
chr11	90052866	90052866	SNV	G	A	chr11-90052866-SNV-G-A	asm
chr11	90053205	90053205	SNV	T	G	chr11-90053205-SNV-T-G	asm
chr11	90053410	90053410	SNV	A	G	chr11-90053410-SNV-A-G	asm
chr11	90053435	90053435	SNV	C	T	chr11-90053435-SNV-C-T	asm
chr11	90053546	90053546	SNV	C	T	chr11-90053546-SNV-C-T	asm
chr11	90053561	90053561	SNV	A	C	chr11-90053561-SNV-A-C	asm
chr11	90053802	90053802	SNV	T	C	chr11-90053802-SNV-T-C	asm
chr11	90054021	90054021	SNV	T	G	chr11-90054021-SNV-T-G	asm
chr11	90054059	90054059	SNV	C	A	chr11-90054059-SNV-C-A	asm
chr11	90054429	90054429	SNV	C	T	chr11-90054429-SNV-C-T	asm
chr11	90054522	90054522	SNV	T	C	chr11-90054522-SNV-T-C	asm
chr11	90054656	90054656	SNV	G	A	chr11-90054656-SNV-G-A	asm
chr11	90054719	90054719	SNV	A	G	chr11-90054719-SNV-A-G	asm
chr11	90055864	90055864	SNV	T	G	chr11-90055864-SNV-T-G	asm
chr11	90057001	90057001	SNV	G	A	chr11-90057001-SNV-G-A	asm
chr11	90057360	90057360	SNV	T	C	chr11-90057360-SNV-T-C	asm
chr11	90057493	90057493	SNV	C	T	chr11-90057493-SNV-C-T	asm
chr11	90057850	90057850	SNV	T	C	chr11-90057850-SNV-T-C	asm
chr11	90058043	90058043	SNV	C	T	chr11-90058043-SNV-C-T	asm
chr11	90058451	90058451	SNV	A	C	chr11-90058451-SNV-A-C	asm
chr11	90059006	90059006	SNV	G	A	chr11-90059006-SNV-G-A	asm
chr11	90060946	90060946	SNV	A	G	chr11-90060946-SNV-A-G	asm
chr11	90060955	90060955	SNV	C	T	chr11-90060955-SNV-C-T	asm
chr11	90061201	90061201	SNV	T	C	chr11-90061201-SNV-T-C	asm
chr11	90061612	90061612	SNV	T	C	chr11-90061612-SNV-T-C	asm
chr11	90061680	90061680	SNV	A	T	chr11-90061680-SNV-A-T	asm
chr11	90061858	90061858	SNV	G	A	chr11-90061858-SNV-G-A	asm
chr11	90062224	90062224	SNV	A	G	chr11-90062224-SNV-A-G	asm
chr11	90062299	90062299	SNV	T	C	chr11-90062299-SNV-T-C	asm
chr11	90062359	90062359	SNV	T	C	chr11-90062359-SNV-T-C	asm
chr11	90062361	90062361	SNV	T	C	chr11-90062361-SNV-T-C	asm
chr11	90062377	90062377	SNV	T	C	chr11-90062377-SNV-T-C	asm
chr11	90062384	90062384	SNV	A	G	chr11-90062384-SNV-A-G	asm
chr11	90062390	90062390	SNV	C	G	chr11-90062390-SNV-C-G	asm
chr11	90062396	90062396	SNV	C	T	chr11-90062396-SNV-C-T	asm
chr11	90062414	90062414	SNV	G	A	chr11-90062414-SNV-G-A	asm
chr11	90062523	90062523	SNV	G	A	chr11-90062523-SNV-G-A	asm
chr11	90062779	90062779	SNV	A	C	chr11-90062779-SNV-A-C	asm
chr11	90062826	90062826	SNV	A	G	chr11-90062826-SNV-A-G	asm
chr11	90062837	90062837	SNV	T	C	chr11-90062837-SNV-T-C	asm
chr11	90063052	90063052	SNV	A	G	chr11-90063052-SNV-A-G	asm
chr11	90063268	90063268	SNV	G	A	chr11-90063268-SNV-G-A	asm
chr11	90063431	90063431	SNV	C	T	chr11-90063431-SNV-C-T	asm
chr11	90063555	90063555	SNV	C	T	chr11-90063555-SNV-C-T	asm
chr11	90064075	90064075	SNV	T	C	chr11-90064075-SNV-T-C	asm
chr11	90064092	90064092	SNV	A	G	chr11-90064092-SNV-A-G	asm
chr11	90065042	90065042	SNV	G	A	chr11-90065042-SNV-G-A	asm
chr11	90065571	90065571	SNV	G	A	chr11-90065571-SNV-G-A	asm
chr11	90065772	90065772	SNV	C	T	chr11-90065772-SNV-C-T	asm
chr11	90065810	90065810	SNV	A	G	chr11-90065810-SNV-A-G	asm
chr11	90065821	90065821	SNV	C	T	chr11-90065821-SNV-C-T	asm
chr11	90066336	90066336	SNV	A	T	chr11-90066336-SNV-A-T	asm
chr11	90066442	90066442	SNV	C	T	chr11-90066442-SNV-C-T	asm
chr11	90066785	90066785	SNV	C	T	chr11-90066785-SNV-C-T	asm
chr11	90066813	90066813	SNV	G	A	chr11-90066813-SNV-G-A	asm
chr11	90066918	90066918	SNV	T	C	chr11-90066918-SNV-T-C	asm
chr11	90066923	90066923	SNV	G	A	chr11-90066923-SNV-G-A	asm
chr11	90066955	90066955	SNV	G	A	chr11-90066955-SNV-G-A	asm
chr11	90067186	90067186	SNV	G	T	chr11-90067186-SNV-G-T	asm
chr11	90067303	90067303	SNV	A	C	chr11-90067303-SNV-A-C	asm
chr11	90067735	90067735	SNV	T	A	chr11-90067735-SNV-T-A	asm
chr11	90067770	90067770	SNV	G	A	chr11-90067770-SNV-G-A	asm
chr11	90067862	90067862	SNV	G	T	chr11-90067862-SNV-G-T	asm
chr11	90068504	90068504	SNV	C	T	chr11-90068504-SNV-C-T	asm
chr11	90068587	90068587	SNV	T	C	chr11-90068587-SNV-T-C	asm
chr11	90069166	90069166	SNV	A	G	chr11-90069166-SNV-A-G	asm
chr11	90069518	90069518	SNV	G	C	chr11-90069518-SNV-G-C	asm
chr11	90069550	90069550	SNV	C	T	chr11-90069550-SNV-C-T	asm
chr11	90069694	90069694	SNV	A	C	chr11-90069694-SNV-A-C	asm
chr11	90070477	90070477	SNV	G	A	chr11-90070477-SNV-G-A	asm
chr11	90070516	90070516	SNV	A	G	chr11-90070516-SNV-A-G	asm
chr11	90070596	90070596	SNV	G	A	chr11-90070596-SNV-G-A	asm
chr11	90070766	90070766	SNV	G	C	chr11-90070766-SNV-G-C	asm
chr11	90070969	90070969	SNV	T	C	chr11-90070969-SNV-T-C	asm
chr11	90071187	90071187	SNV	G	A	chr11-90071187-SNV-G-A	asm
chr11	90071370	90071370	SNV	T	C	chr11-90071370-SNV-T-C	asm
chr11	90071416	90071416	SNV	G	A	chr11-90071416-SNV-G-A	asm
chr11	90071656	90071656	SNV	G	A	chr11-90071656-SNV-G-A	asm
chr11	90071722	90071722	SNV	T	C	chr11-90071722-SNV-T-C	asm
chr11	90071742	90071742	SNV	C	T	chr11-90071742-SNV-C-T	asm
chr11	90071889	90071889	SNV	G	C	chr11-90071889-SNV-G-C	asm
chr11	90071918	90071918	SNV	C	T	chr11-90071918-SNV-C-T	asm
chr11	90072048	90072048	SNV	C	G	chr11-90072048-SNV-C-G	asm
chr11	90072054	90072054	SNV	C	T	chr11-90072054-SNV-C-T	asm
chr11	90072118	90072118	SNV	A	G	chr11-90072118-SNV-A-G	asm
chr11	90072247	90072247	SNV	C	T	chr11-90072247-SNV-C-T	asm
chr11	90072705	90072705	SNV	A	G	chr11-90072705-SNV-A-G	asm
chr11	90073150	90073150	SNV	C	A	chr11-90073150-SNV-C-A	asm
chr11	90073251	90073251	SNV	T	G	chr11-90073251-SNV-T-G	asm
chr11	90073270	90073270	SNV	T	C	chr11-90073270-SNV-T-C	asm
chr11	90074183	90074183	SNV	C	T	chr11-90074183-SNV-C-T	asm
chr11	90074206	90074206	SNV	G	C	chr11-90074206-SNV-G-C	asm
chr11	90074956	90074956	SNV	G	A	chr11-90074956-SNV-G-A	asm
chr11	90075004	90075004	SNV	T	A	chr11-90075004-SNV-T-A	asm
chr11	90075187	90075187	SNV	T	A	chr11-90075187-SNV-T-A	asm
chr11	90075188	90075188	SNV	C	A	chr11-90075188-SNV-C-A	asm
chr11	90076771	90076771	SNV	G	T	chr11-90076771-SNV-G-T	asm
chr11	90076855	90076855	SNV	T	C	chr11-90076855-SNV-T-C	asm
chr11	90077704	90077704	SNV	A	G	chr11-90077704-SNV-A-G	asm
chr11	90078058	90078058	SNV	C	T	chr11-90078058-SNV-C-T	asm
chr11	90078634	90078634	SNV	T	C	chr11-90078634-SNV-T-C	asm
chr11	90078721	90078721	SNV	C	A	chr11-90078721-SNV-C-A	asm
chr11	90079210	90079210	SNV	G	A	chr11-90079210-SNV-G-A	asm
chr11	90079290	90079290	SNV	A	T	chr11-90079290-SNV-A-T	asm
chr11	90079591	90079591	SNV	G	A	chr11-90079591-SNV-G-A	asm
chr11	90079659	90079659	SNV	A	G	chr11-90079659-SNV-A-G	asm
chr11	90079738	90079738	SNV	G	T	chr11-90079738-SNV-G-T	asm
chr11	90079763	90079763	SNV	G	T	chr11-90079763-SNV-G-T	asm
chr11	90080257	90080257	SNV	A	G	chr11-90080257-SNV-A-G	asm
chr11	90081137	90081137	SNV	G	A	chr11-90081137-SNV-G-A	asm
chr11	90081229	90081229	SNV	T	C	chr11-90081229-SNV-T-C	asm
chr11	90081662	90081662	SNV	C	A	chr11-90081662-SNV-C-A	asm
chr11	90081689	90081689	SNV	T	G	chr11-90081689-SNV-T-G	asm
chr11	90081738	90081738	SNV	T	G	chr11-90081738-SNV-T-G	asm
chr11	90081885	90081885	SNV	C	T	chr11-90081885-SNV-C-T	asm
chr11	90081894	90081894	SNV	A	G	chr11-90081894-SNV-A-G	asm
chr11	90082113	90082113	SNV	T	C	chr11-90082113-SNV-T-C	asm
chr11	90082118	90082118	SNV	C	G	chr11-90082118-SNV-C-G	asm
chr11	90082158	90082158	SNV	C	T	chr11-90082158-SNV-C-T	asm
chr11	90082551	90082551	SNV	C	T	chr11-90082551-SNV-C-T	asm
chr11	90082597	90082597	SNV	A	T	chr11-90082597-SNV-A-T	asm
chr11	90083004	90083004	SNV	G	A	chr11-90083004-SNV-G-A	asm
chr11	90083017	90083017	SNV	T	C	chr11-90083017-SNV-T-C	asm
chr11	90083270	90083270	SNV	A	G	chr11-90083270-SNV-A-G	asm
chr11	90083340	90083340	SNV	A	G	chr11-90083340-SNV-A-G	asm
chr11	90083567	90083567	SNV	T	C	chr11-90083567-SNV-T-C	asm
chr11	90083632	90083632	SNV	G	A	chr11-90083632-SNV-G-A	asm
chr11	90083906	90083906	SNV	G	C	chr11-90083906-SNV-G-C	asm
chr11	90083983	90083983	SNV	T	A	chr11-90083983-SNV-T-A	asm
chr11	90084339	90084339	SNV	A	G	chr11-90084339-SNV-A-G	asm
chr11	90084496	90084496	SNV	C	T	chr11-90084496-SNV-C-T	asm
chr11	90084557	90084557	SNV	C	T	chr11-90084557-SNV-C-T	asm
chr11	90084603	90084603	SNV	C	T	chr11-90084603-SNV-C-T	asm
chr11	90084664	90084664	SNV	G	A	chr11-90084664-SNV-G-A	asm
chr11	90084691	90084691	SNV	G	A	chr11-90084691-SNV-G-A	asm
chr11	90084752	90084752	SNV	T	C	chr11-90084752-SNV-T-C	asm
chr11	90084793	90084793	SNV	A	G	chr11-90084793-SNV-A-G	asm
chr11	90084846	90084846	SNV	A	G	chr11-90084846-SNV-A-G	asm
chr11	90085375	90085375	SNV	G	T	chr11-90085375-SNV-G-T	asm
chr11	90085472	90085472	SNV	C	T	chr11-90085472-SNV-C-T	asm
chr11	90085560	90085560	SNV	T	C	chr11-90085560-SNV-T-C	asm
chr11	90085686	90085686	SNV	A	C	chr11-90085686-SNV-A-C	asm
chr11	90086067	90086067	SNV	C	T	chr11-90086067-SNV-C-T	asm
chr11	90086235	90086235	SNV	G	T	chr11-90086235-SNV-G-T	asm
chr11	90086236	90086236	SNV	G	C	chr11-90086236-SNV-G-C	asm
chr11	90086252	90086252	SNV	G	A	chr11-90086252-SNV-G-A	asm
chr11	90086270	90086270	SNV	C	T	chr11-90086270-SNV-C-T	asm
chr11	90086410	90086410	SNV	G	A	chr11-90086410-SNV-G-A	asm
chr11	114964267	114964267	SNV	A	T	chr11-114964267-SNV-A-T	asm
chr12	57730124	57730124	SNV	A	T	chr12-57730124-SNV-A-T	asm
chr12	97706213	97706213	SNV	C	G	chr12-97706213-SNV-C-G	asm
chr12	97706225	97706225	SNV	C	T	chr12-97706225-SNV-C-T	asm
chr12	97706229	97706229	SNV	A	G	chr12-97706229-SNV-A-G	asm
chr12	97706265	97706265	SNV	G	A	chr12-97706265-SNV-G-A	asm
chr12	97706298	97706298	SNV	T	C	chr12-97706298-SNV-T-C	asm
chr12	97706315	97706315	SNV	C	T	chr12-97706315-SNV-C-T	asm
chr12	97706316	97706316	SNV	A	G	chr12-97706316-SNV-A-G	asm
chr12	97706324	97706324	SNV	T	G	chr12-97706324-SNV-T-G	asm
chr12	97706348	97706348	SNV	A	C	chr12-97706348-SNV-A-C	asm
chr12	97706349	97706349	SNV	T	C	chr12-97706349-SNV-T-C	asm
chr12	97706358	97706358	SNV	G	C	chr12-97706358-SNV-G-C	asm
chr12	97706397	97706397	SNV	T	C	chr12-97706397-SNV-T-C	asm
chr12	97706424	97706424	SNV	C	A	chr12-97706424-SNV-C-A	asm
chr12	97706751	97706751	SNV	C	T	chr12-97706751-SNV-C-T	asm
chr12	97706795	97706795	SNV	T	G	chr12-97706795-SNV-T-G	asm
chr12	97706817	97706817	SNV	C	T	chr12-97706817-SNV-C-T	asm
chr12	112442877	112442877	SNV	T	A	chr12-112442877-SNV-T-A	asm
chr12	131652303	131652303	SNV	G	A	chr12-131652303-SNV-G-A	asm
chr12	131652322	131652322	SNV	C	G	chr12-131652322-SNV-C-G	asm
chr12	131652343	131652343	SNV	G	A	chr12-131652343-SNV-G-A	asm
chr12	131652379	131652379	SNV	C	T	chr12-131652379-SNV-C-T	asm
chr12	131652391	131652391	SNV	A	G	chr12-131652391-SNV-A-G	asm
chr12	131652571	131652571	SNV	T	C	chr12-131652571-SNV-T-C	asm
chr12	131652594	131652594	SNV	A	G	chr12-131652594-SNV-A-G	asm
chr12	131652596	131652596	SNV	G	A	chr12-131652596-SNV-G-A	asm
chr12	131652597	131652597	SNV	T	C	chr12-131652597-SNV-T-C	asm
chr12	131652598	131652598	SNV	G	A	chr12-131652598-SNV-G-A	asm
chr12	131652610	131652610	SNV	G	A	chr12-131652610-SNV-G-A	asm
chr12	131652620	131652620	SNV	T	C	chr12-131652620-SNV-T-C	asm
chr12	131652624	131652624	SNV	T	A	chr12-131652624-SNV-T-A	asm
chr12	131652653	131652653	SNV	T	C	chr12-131652653-SNV-T-C	asm
chr12	131652671	131652671	SNV	A	G	chr12-131652671-SNV-A-G	asm
chr12	131652698	131652698	SNV	C	T	chr12-131652698-SNV-C-T	asm
chr12	131652703	131652703	SNV	C	G	chr12-131652703-SNV-C-G	asm
chr12	131652728	131652728	SNV	A	G	chr12-131652728-SNV-A-G	asm
chr12	131652729	131652729	SNV	A	G	chr12-131652729-SNV-A-G	asm
chr12	131652740	131652740	SNV	A	G	chr12-131652740-SNV-A-G	asm
chr12	131652747	131652747	SNV	T	C	chr12-131652747-SNV-T-C	asm
chr12	131652759	131652759	SNV	C	T	chr12-131652759-SNV-C-T	asm
chr12	131652774	131652774	SNV	G	A	chr12-131652774-SNV-G-A	asm
chr12	131652785	131652785	SNV	C	T	chr12-131652785-SNV-C-T	asm
chr12	131652795	131652795	SNV	T	C	chr12-131652795-SNV-T-C	asm
chr12	131652796	131652796	SNV	G	A	chr12-131652796-SNV-G-A	asm
chr12	131652802	131652802	SNV	C	T	chr12-131652802-SNV-C-T	asm
chr12	131652819	131652819	SNV	C	T	chr12-131652819-SNV-C-T	asm
chr12	131652962	131652962	SNV	G	A	chr12-131652962-SNV-G-A	asm
chr12	131652969	131652969	SNV	C	T	chr12-131652969-SNV-C-T	asm
chr12	131652976	131652976	SNV	C	T	chr12-131652976-SNV-C-T	asm
chr12	131652987	131652987	SNV	A	G	chr12-131652987-SNV-A-G	asm
chr12	131653106	131653106	SNV	G	A	chr12-131653106-SNV-G-A	asm
chr12	131653163	131653163	SNV	C	T	chr12-131653163-SNV-C-T	asm
chr12	131653482	131653482	SNV	G	A	chr12-131653482-SNV-G-A	asm
chr13	18781856	18781856	SNV	G	A	chr13-18781856-SNV-G-A	asm
chr13	18781935	18781935	SNV	C	G	chr13-18781935-SNV-C-G	asm
chr13	18781983	18781983	SNV	T	C	chr13-18781983-SNV-T-C	asm
chr13	18782004	18782004	SNV	T	C	chr13-18782004-SNV-T-C	asm
chr13	18782072	18782072	SNV	T	G	chr13-18782072-SNV-T-G	asm
chr13	18782112	18782112	SNV	A	C	chr13-18782112-SNV-A-C	asm
chr13	18782115	18782115	SNV	C	G	chr13-18782115-SNV-C-G	asm
chr13	18782157	18782157	SNV	C	T	chr13-18782157-SNV-C-T	asm
chr13	18782159	18782159	SNV	G	A	chr13-18782159-SNV-G-A	asm
chr13	18782164	18782164	SNV	T	C	chr13-18782164-SNV-T-C	asm
chr13	18782191	18782191	SNV	A	G	chr13-18782191-SNV-A-G	asm
chr13	18782268	18782268	SNV	A	G	chr13-18782268-SNV-A-G	asm
chr13	18782335	18782335	SNV	A	C	chr13-18782335-SNV-A-C	asm
chr13	18782367	18782367	SNV	T	C	chr13-18782367-SNV-T-C	asm
chr13	18782385	18782385	SNV	T	C	chr13-18782385-SNV-T-C	asm
chr13	18782386	18782386	SNV	G	T	chr13-18782386-SNV-G-T	asm
chr13	18782394	18782394	SNV	A	C	chr13-18782394-SNV-A-C	asm
chr13	18782513	18782513	SNV	C	A	chr13-18782513-SNV-C-A	asm
chr13	18782560	18782560	SNV	T	G	chr13-18782560-SNV-T-G	asm
chr13	18782605	18782605	SNV	G	A	chr13-18782605-SNV-G-A	asm
chr13	18782703	18782703	SNV	A	G	chr13-18782703-SNV-A-G	asm
chr13	18782728	18782728	SNV	A	T	chr13-18782728-SNV-A-T	asm
chr13	18782739	18782739	SNV	C	A	chr13-18782739-SNV-C-A	asm
chr13	18782855	18782855	SNV	A	G	chr13-18782855-SNV-A-G	asm
chr13	18782868	18782868	SNV	T	C	chr13-18782868-SNV-T-C	asm
chr13	18782873	18782873	SNV	A	G	chr13-18782873-SNV-A-G	asm
chr13	18782879	18782879	SNV	A	G	chr13-18782879-SNV-A-G	asm
chr13	18782918	18782918	SNV	T	C	chr13-18782918-SNV-T-C	asm
chr13	22499175	22499175	SNV	T	C	chr13-22499175-SNV-T-C	asm
chr13	65492517	65492517	SNV	T	A	chr13-65492517-SNV-T-A	asm
chr13	75681718	75681718	SNV	G	A	chr13-75681718-SNV-G-A	asm
chr14	39286895	39286895	SNV	G	A	chr14-39286895-SNV-G-A	asm
chr14	77168309	77168309	SNV	A	C	chr14-77168309-SNV-A-C	asm
chr15	21362913	21362913	SNV	A	G	chr15-21362913-SNV-A-G	asm
chr15	21362968	21362968	SNV	G	A	chr15-21362968-SNV-G-A	asm
chr15	21363083	21363083	SNV	C	A	chr15-21363083-SNV-C-A	asm
chr15	21363117	21363117	SNV	G	T	chr15-21363117-SNV-G-T	asm
chr15	21364104	21364104	SNV	C	T	chr15-21364104-SNV-C-T	asm
chr15	21364153	21364153	SNV	T	C	chr15-21364153-SNV-T-C	asm
chr15	21364283	21364283	SNV	G	A	chr15-21364283-SNV-G-A	asm
chr15	21364346	21364346	SNV	T	C	chr15-21364346-SNV-T-C	asm
chr15	21364443	21364443	SNV	T	C	chr15-21364443-SNV-T-C	asm
chr15	21365421	21365421	SNV	G	C	chr15-21365421-SNV-G-C	asm
chr15	21491005	21491005	SNV	G	A	chr15-21491005-SNV-G-A	asm
chr15	21491889	21491889	SNV	T	C	chr15-21491889-SNV-T-C	asm
chr15	21493822	21493822	SNV	A	G	chr15-21493822-SNV-A-G	asm
chr15	21494080	21494080	SNV	G	A	chr15-21494080-SNV-G-A	asm
chr15	21494555	21494555	SNV	T	A	chr15-21494555-SNV-T-A	asm
chr15	21495488	21495488	SNV	T	C	chr15-21495488-SNV-T-C	asm
chr15	22529948	22529948	SNV	T	G	chr15-22529948-SNV-T-G	asm
chr15	22532023	22532023	SNV	G	A	chr15-22532023-SNV-G-A	asm
chr15	22655504	22655504	SNV	T	G	chr15-22655504-SNV-T-G	asm
chr15	22656890	22656890	SNV	T	G	chr15-22656890-SNV-T-G	asm
chr15	22656938	22656938	SNV	C	T	chr15-22656938-SNV-C-T	asm
chr15	22916125	22916125	SNV	C	T	chr15-22916125-SNV-C-T	asm
chr15	22922998	22922998	SNV	G	A	chr15-22922998-SNV-G-A	asm
chr15	22962401	22962401	SNV	C	T	chr15-22962401-SNV-C-T	asm
chr15	101626874	101626874	SNV	G	A	chr15-101626874-SNV-G-A	asm
[truncated: 2,849 more rows]
