# Supplementary material for: Whole-genome long-read sequencing downsampling and its effect on variant-calling precision and recall
Source: Genome Res. 2023 Dec;33(12):2029–40. doi: 10.1101/gr.278070.123 (PMC10760522; doi:10.1101/gr.278070.123)
Supplement: Supplement 6 [file Supplemental_Table_S4.xlsx]

## Sheet: S4
S4 - indel (read-based)
SAMPLE	COVERAGE	SVTYPE	TECH	METRIC.Recall	METRIC.Precision	METRIC.F1_Score	CALLER	Filter	Genotype	QQ.Field	QQ	METRIC.Frac_NA	FP.gt	FP.al	Subset.Size	Subset.IS_CONF.Size	Subset.Level	TRUTH.TOTAL	TRUTH.TOTAL.ti	TRUTH.TOTAL.tv	TRUTH.TOTAL.het	TRUTH.TOTAL.homalt	TRUTH.TOTAL.TiTv_ratio	TRUTH.TOTAL.het_hom_ratio	TRUTH.TP	TRUTH.TP.ti	TRUTH.TP.tv	TRUTH.TP.het	TRUTH.TP.homalt	TRUTH.TP.TiTv_ratio	TRUTH.TP.het_hom_ratio	TRUTH.FN	TRUTH.FN.ti	TRUTH.FN.tv	TRUTH.FN.het	TRUTH.FN.homalt	TRUTH.FN.TiTv_ratio	TRUTH.FN.het_hom_ratio	QUERY.TOTAL	QUERY.TOTAL.ti	QUERY.TOTAL.tv	QUERY.TOTAL.het	QUERY.TOTAL.homalt	QUERY.TOTAL.TiTv_ratio	QUERY.TOTAL.het_hom_ratio	QUERY.TP	QUERY.TP.ti	QUERY.TP.tv	QUERY.TP.het
HG002	5	INDEL	HiFi	0.762571	0.708428	0.734503	clair3	ALL	*	QUAL	*	0.409366	27554	54522	2809091522	2546949881	0	525466	.	.	296594	194071		1.52828	400705	.	.	213010	171037		1.2454	124761	.	.	83584	23034		3.62872	953788	.	.	537842	343485		1.56584	399086	.	.	212580
HG002	5	INDEL	HiFi	0.733534	0.773598	0.753033	clair3	PASS	*	QUAL	*	0.3856	19833	41468	2809091522	2546949881	0	525466	.	.	296594	194071		1.52828	385447	.	.	204364	165135		1.23756	140019	.	.	92230	28936		3.18738	807604	.	.	449586	299940		1.49892	383853	.	.	203917
HG002	8	INDEL	HiFi	0.890493	0.836701	0.86276	clair3	ALL	*	QUAL	*	0.424481	13294	34013	2809091522	2546949881	0	525466	.	.	296594	194071		1.52828	467924	.	.	259521	184498		1.40663	57542	.	.	37073	9573		3.87266	967458	.	.	553848	326657		1.6955	465867	.	.	259094
HG002	8	INDEL	HiFi	0.87689	0.872154	0.874516	clair3	PASS	*	QUAL	*	0.403179	9889	28015	2809091522	2546949881	0	525466	.	.	296594	194071		1.52828	460776	.	.	255196	182104		1.40138	64690	.	.	41398	11967		3.45935	881311	.	.	500294	304297		1.6441	458740	.	.	254760
HG002	10	INDEL	HiFi	0.926629	0.891455	0.908702	clair3	ALL	*	QUAL	*	0.42984	8537	24198	2809091522	2546949881	0	525466	.	.	296594	194071		1.52828	486912	.	.	272693	187740		1.4525	38554	.	.	23901	6331		3.77523	953641	.	.	545721	318142		1.71534	484709	.	.	272283
HG002	10	INDEL	HiFi	0.918295	0.913492	0.915887	clair3	PASS	*	QUAL	*	0.411031	6605	20702	2809091522	2546949881	0	525466	.	.	296594	194071		1.52828	482533	.	.	270002	186329		1.44906	42933	.	.	26592	7742		3.43477	892826	.	.	507379	303169		1.67358	480357	.	.	269590
HG002	12	INDEL	HiFi	0.949565	0.928073	0.938696	clair3	ALL	*	QUAL	*	0.433021	5369	17327	2809091522	2546949881	0	525466	.	.	296594	194071		1.52828	498964	.	.	280813	189553		1.48145	26502	.	.	15781	4518		3.49292	943794	.	.	539472	312792		1.7247	496622	.	.	280388
HG002	12	INDEL	HiFi	0.944288	0.941048	0.942665	clair3	PASS	*	QUAL	*	0.416602	4236	15351	2809091522	2546949881	0	525466	.	.	296594	194071		1.52828	496191	.	.	279057	188708		1.47878	29275	.	.	17537	5363		3.27	899554	.	.	511538	302046		1.69358	493860	.	.	278613
HG002	15	INDEL	HiFi	0.968487	0.95824	0.963336	clair3	ALL	*	QUAL	*	0.434251	3199	10913	2809091522	2546949881	0	525466	.	.	296594	194071		1.52828	508907	.	.	287100	191144		1.50201	16559	.	.	9494	2927		3.24359	934234	.	.	533553	307757		1.73368	506470	.	.	286648
HG002	15	INDEL	HiFi	0.965617	0.964943	0.96528	clair3	PASS	*	QUAL	*	0.421066	2593	9911	2809091522	2546949881	0	525466	.	.	296594	194071		1.52828	507399	.	.	286146	190693		1.50056	18067	.	.	10448	3378		3.09295	903944	.	.	514246	300536		1.7111	504978	.	.	285690
HG002	17	INDEL	HiFi	0.976063	0.970286	0.973166	clair3	ALL	*	QUAL	*	0.434991	2314	8250	2809091522	2546949881	0	525466	.	.	296594	194071		1.52828	512888	.	.	289519	191807		1.50943	12578	.	.	7075	2264		3.125	931046	.	.	531919	305990		1.73835	510418	.	.	289106
HG002	17	INDEL	HiFi	0.974092	0.974424	0.974258	clair3	PASS	*	QUAL	*	0.423095	1882	7668	2809091522	2546949881	0	525466	.	.	296594	194071		1.52828	511852	.	.	288866	191489		1.50853	13614	.	.	7728	2582		2.99303	906154	.	.	515962	300129		1.71913	509395	.	.	288453
HG002	20	INDEL	HiFi	0.983398	0.98035	0.981871	clair3	ALL	*	QUAL	*	0.435883	1590	5730	2809091522	2546949881	0	525466	.	.	296594	194071		1.52828	516742	.	.	291852	192298		1.51771	8724	.	.	4742	1773		2.67456	929818	.	.	532307	303663		1.75295	514219	.	.	291422
HG002	20	INDEL	HiFi	0.982142	0.982717	0.982429	clair3	PASS	*	QUAL	*	0.425753	1318	5374	2809091522	2546949881	0	525466	.	.	296594	194071		1.52828	516082	.	.	291435	192093		1.51716	9384	.	.	5159	1978		2.60819	910059	.	.	519499	299059		1.73711	513567	.	.	291002
HG002	25	INDEL	HiFi	0.990252	0.989113	0.989683	clair3	ALL	*	QUAL	*	0.436812	835	3481	2809091522	2546949881	0	525466	.	.	296594	194071		1.52828	520344	.	.	293895	192990		1.52285	5122	.	.	2699	1081		2.49676	929510	.	.	533580	301891		1.76746	517790	.	.	293490
HG002	25	INDEL	HiFi	0.989569	0.990168	0.989869	clair3	PASS	*	QUAL	*	0.428444	712	3305	2809091522	2546949881	0	525466	.	.	296594	194071		1.52828	519985	.	.	293675	192869		1.52267	5481	.	.	2919	1202		2.42845	914322	.	.	523457	298474		1.75378	517448	.	.	293269
HG002	30	INDEL	HiFi	0.993499	0.992793	0.993146	clair3	ALL	*	QUAL	*	0.437793	523	2349	2809091522	2546949881	0	525466	.	.	296594	194071		1.52828	522050	.	.	294847	193269		1.52558	3416	.	.	1747	802		2.1783	930686	.	.	535528	300639		1.7813	519467	.	.	294439
HG002	30	INDEL	HiFi	0.993126	0.993453	0.99329	clair3	PASS	*	QUAL	*	0.430644	440	2251	2809091522	2546949881	0	525466	.	.	296594	194071		1.52828	521854	.	.	294722	193211		1.52539	3612	.	.	1872	860		2.17674	918058	.	.	526849	297898		1.76856	519280	.	.	294311
HG00733	5	INDEL	HiFi	0.701939	0.582907	0.636909	clair3	ALL	*	QUAL	*	0.413901	34905	77725	3031399176	2546864659	0	524745	.	.	315538	208857		1.51078	368339	.	.	205846	162493		1.2668	156406	.	.	109692	46364		2.36589	1057463	.	.	600402	378464		1.58642	361273	.	.	194367
HG00733	5	INDEL	HiFi	0.673893	0.653206	0.663388	clair3	PASS	*	QUAL	*	0.391637	25882	62133	3031399176	2546864659	0	524745	.	.	315538	208857		1.51078	353622	.	.	197016	156606		1.25804	171123	.	.	118522	52251		2.26832	872319	.	.	486321	322901		1.5061	346648	.	.	185658
HG00733	8	INDEL	HiFi	0.808366	0.678421	0.737715	clair3	ALL	*	QUAL	*	0.426889	22113	67984	3031399176	2546864659	0	524766	.	.	315538	208857		1.51078	424203	.	.	250287	173916		1.43913	100563	.	.	65251	34941		1.86746	1068110	.	.	613682	358402		1.71227	415293	.	.	235655
HG00733	8	INDEL	HiFi	0.793672	0.722404	0.756363	clair3	PASS	*	QUAL	*	0.405769	17744	59498	3031399176	2546864659	0	524766	.	.	315538	208857		1.51078	416492	.	.	245284	171208		1.43267	108274	.	.	70254	37649		1.86603	949568	.	.	539223	325976		1.65418	407626	.	.	230720
HG00733	10	INDEL	HiFi	0.83991	0.72361	0.777435	clair3	ALL	*	QUAL	*	0.431529	17169	61028	3031399176	2546864659	0	524767	.	.	315538	208857		1.51078	440757	.	.	263966	176791		1.4931	84010	.	.	51572	32066		1.60831	1047845	.	.	601754	346195		1.73819	431032	.	.	247918
HG00733	10	INDEL	HiFi	0.830367	0.755455	0.791141	clair3	PASS	*	QUAL	*	0.4121	14394	55514	3031399176	2546864659	0	524767	.	.	315538	208857		1.51078	435749	.	.	260702	175047		1.48933	89018	.	.	54836	33810		1.62189	959303	.	.	545761	322436		1.69262	426057	.	.	244707
HG00733	12	INDEL	HiFi	0.857282	0.754048	0.802358	clair3	ALL	*	QUAL	*	0.434086	14373	56704	3031399176	2546864659	0	524777	.	.	315538	208857		1.51078	449882	.	.	271680	178202		1.52456	74895	.	.	43858	30655		1.4307	1030391	.	.	589504	338354		1.74227	439695	.	.	254896
HG00733	12	INDEL	HiFi	0.850436	0.777105	0.812118	clair3	PASS	*	QUAL	*	0.416756	12528	53009	3031399176	2546864659	0	524777	.	.	315538	208857		1.51078	446289	.	.	269278	177011		1.52125	78488	.	.	46260	31846		1.45262	962246	.	.	546519	320170		1.70697	436130	.	.	252524
HG00733	15	INDEL	HiFi	0.873581	0.784569	0.826686	clair3	ALL	*	QUAL	*	0.435254	11882	51830	3031399176	2546864659	0	524777	.	.	315538	208857		1.51078	458435	.	.	278623	179812		1.54952	66342	.	.	36915	29045		1.27096	1010762	.	.	576621	329364		1.75071	447851	.	.	261137
HG00733	15	INDEL	HiFi	0.869274	0.799498	0.832927	clair3	PASS	*	QUAL	*	0.420406	10735	49652	3031399176	2546864659	0	524777	.	.	315538	208857		1.51078	456175	.	.	277137	179038		1.54792	68602	.	.	38401	29819		1.2878	961639	.	.	545809	315997		1.72726	445608	.	.	259671
HG00733	17	INDEL	HiFi	0.880006	0.796717	0.836293	clair3	ALL	*	QUAL	*	0.435771	10725	50000	3031399176	2546864659	0	524777	.	.	315538	208857		1.51078	461807	.	.	281413	180394		1.55999	62970	.	.	34125	28463		1.19892	1003278	.	.	572184	325489		1.75792	451005	.	.	263564
HG00733	17	INDEL	HiFi	0.876635	0.808332	0.841099	clair3	PASS	*	QUAL	*	0.422379	9861	48307	3031399176	2546864659	0	524777	.	.	315538	208857		1.51078	460038	.	.	280237	179801		1.5586	64739	.	.	35301	29056		1.21493	962187	.	.	546149	314509		1.73651	449254	.	.	262408
HG00733	20	INDEL	HiFi	0.886488	0.807959	0.845403	clair3	ALL	*	QUAL	*	0.435699	9905	48129	3031399176	2546864659	0	524780	.	.	315538	208857		1.51078	465211	.	.	284162	181049		1.56953	59569	.	.	31376	27808		1.12831	996436	.	.	568470	321070		1.77055	454307	.	.	266110
HG00733	20	INDEL	HiFi	0.884001	0.816507	0.848914	clair3	PASS	*	QUAL	*	0.423917	9219	46961	3031399176	2546864659	0	524780	.	.	315538	208857		1.51078	463906	.	.	283328	180578		1.56901	60874	.	.	32210	28279		1.13901	963122	.	.	547411	312097		1.75398	453029	.	.	265304
HG00733	25	INDEL	HiFi	0.892591	0.818044	0.853693	clair3	ALL	*	QUAL	*	0.436383	8895	46468	3031399176	2546864659	0	524781	.	.	315538	208857		1.51078	468415	.	.	286838	181577		1.5797	56366	.	.	28700	27280		1.05205	991883	.	.	567608	316238		1.79488	457321	.	.	268443
HG00733	25	INDEL	HiFi	0.890793	0.823763	0.855967	clair3	PASS	*	QUAL	*	0.426008	8477	45667	3031399176	2546864659	0	524781	.	.	315538	208857		1.51078	467471	.	.	286242	181229		1.57945	57310	.	.	29296	27628		1.06037	965215	.	.	550461	309175		1.78042	456386	.	.	267855
HG00733	30	INDEL	HiFi	0.89605	0.822513	0.857708	clair3	ALL	*	QUAL	*	0.436727	8538	45669	3031399176	2546864659	0	524780	.	.	315538	208857		1.51078	470229	.	.	288350	181879		1.58539	54551	.	.	27188	26978		1.00778	990843	.	.	569519	312205		1.82418	459057	.	.	269832
HG00733	30	INDEL	HiFi	0.894659	0.826927	0.859461	clair3	PASS	*	QUAL	*	0.427482	8142	45047	3031399176	2546864659	0	524780	.	.	315538	208857		1.51078	469499	.	.	287866	181633		1.58488	55281	.	.	27672	27224		1.01646	968137	.	.	554583	306482		1.80951	458346	.	.	269366
HG002	5	INDEL	ONT	0.400032	0.438616	0.418436	clair3	ALL	*	QUAL	*	0.413478	29800	102132	2809091522	2546949881	0	525466	.	.	296594	194071		1.52828	210203	.	.	98506	107481		0.916497	315263	.	.	198088	86590		2.28765	816939	.	.	407134	361197		1.12718	210164	.	.	98559
HG002	5	INDEL	ONT	0.310762	0.780113	0.444468	clair3	PASS	*	QUAL	*	0.317952	8754	23274	2809091522	2546949881	0	525466	.	.	296594	194071		1.52828	163295	.	.	75094	85524		0.878046	362171	.	.	221500	108547		2.04059	306895	.	.	143469	154048		0.931327	163291	.	.	75120
HG002	8	INDEL	ONT	0.540693	0.493868	0.516221	clair3	ALL	*	QUAL	*	0.411286	26433	110841	2809091522	2546949881	0	525466	.	.	296594	194071		1.52828	284116	.	.	146364	131006		1.11723	241350	.	.	150230	63065		2.38215	977014	.	.	504811	405117		1.24609	284064	.	.	146508
HG002	8	INDEL	ONT	0.441559	0.815837	0.572994	clair3	PASS	*	QUAL	*	0.313074	6456	28597	2809091522	2546949881	0	525466	.	.	296594	194071		1.52828	232024	.	.	118882	108277		1.09794	293442	.	.	177712	85794		2.07138	414020	.	.	213574	184859		1.15533	232025	.	.	119019
HG002	10	INDEL	ONT	0.593656	0.528785	0.559346	clair3	ALL	*	QUAL	*	0.412618	24092	107240	2809091522	2546949881	0	525466	.	.	296594	194071		1.52828	311946	.	.	165122	138850		1.18921	213520	.	.	131472	55221		2.38083	1004257	.	.	522436	408910		1.27763	311921	.	.	165355
HG002	10	INDEL	ONT	0.495577	0.829641	0.620503	clair3	PASS	*	QUAL	*	0.314152	5438	30136	2809091522	2546949881	0	525466	.	.	296594	194071		1.52828	260409	.	.	137416	116791		1.1766	265057	.	.	159178	77280		2.05976	457651	.	.	242811	195818		1.23998	260407	.	.	137609
HG002	12	INDEL	ONT	0.630271	0.562704	0.594574	clair3	ALL	*	QUAL	*	0.414387	22429	101509	2809091522	2546949881	0	525466	.	.	296594	194071		1.52828	331186	.	.	177839	144334		1.23214	194280	.	.	118755	49737		2.38766	1004850	.	.	524951	403806		1.30001	331125	.	.	178087
HG002	12	INDEL	ONT	0.535034	0.840815	0.653945	clair3	PASS	*	QUAL	*	0.31598	4998	30808	2809091522	2546949881	0	525466	.	.	296594	194071		1.52828	281142	.	.	150870	123028		1.22631	244324	.	.	145724	71043		2.05121	488825	.	.	263609	203616		1.29464	281140	.	.	151081
HG002	15	INDEL	ONT	0.666005	0.612112	0.637922	clair3	ALL	*	QUAL	*	0.416545	20019	91056	2809091522	2546949881	0	525466	.	.	296594	194071		1.52828	349963	.	.	189891	149581		1.26949	175503	.	.	106703	44490		2.39836	979661	.	.	510729	391373		1.30497	349876	.	.	190173
HG002	15	INDEL	ONT	0.576726	0.857902	0.68976	clair3	PASS	*	QUAL	*	0.316619	4462	30096	2809091522	2546949881	0	525466	.	.	296594	194071		1.52828	303050	.	.	164881	129435		1.27385	222416	.	.	131713	64636		2.03777	516842	.	.	282503	209883		1.346	303011	.	.	165134
HG002	17	INDEL	ONT	0.685108	0.641793	0.662743	clair3	ALL	*	QUAL	*	0.417345	18740	85094	2809091522	2546949881	0	525466	.	.	296594	194071		1.52828	360001	.	.	196872	151962		1.29553	165465	.	.	99722	42109		2.36819	962541	.	.	502750	381871		1.31654	359936	.	.	197221
HG002	17	INDEL	ONT	0.598861	0.865222	0.707812	clair3	PASS	*	QUAL	*	0.317562	4344	29866	2809091522	2546949881	0	525466	.	.	296594	194071		1.52828	314681	.	.	172587	132659		1.30098	210785	.	.	124007	61412		2.01926	532901	.	.	293514	213456		1.37506	314657	.	.	172897
HG002	20	INDEL	ONT	0.706613	0.68175	0.693959	clair3	ALL	*	QUAL	*	0.41734	17027	76837	2809091522	2546949881	0	525466	.	.	296594	194071		1.52828	371301	.	.	203641	155484		1.30972	154165	.	.	92953	38587		2.40892	934508	.	.	487829	369318		1.32089	371213	.	.	204018
HG002	20	INDEL	ONT	0.625487	0.877246	0.730277	clair3	PASS	*	QUAL	*	0.317686	3958	28603	2809091522	2546949881	0	525466	.	.	296594	194071		1.52828	328672	.	.	181197	137065		1.32198	196794	.	.	115397	57006		2.0243	549042	.	.	304138	217423		1.39883	328633	.	.	181537
HG002	25	INDEL	ONT	0.731844	0.734528	0.733183	clair3	ALL	*	QUAL	*	0.416895	14419	67065	2809091522	2546949881	0	525466	.	.	296594	194071		1.52828	384559	.	.	211497	159585		1.32529	140907	.	.	85097	34486		2.46758	897632	.	.	468038	353966		1.32227	384462	.	.	211909
HG002	25	INDEL	ONT	0.65841	0.89067	0.757128	clair3	PASS	*	QUAL	*	0.317776	3696	27576	2809091522	2546949881	0	525466	.	.	296594	194071		1.52828	345972	.	.	191628	142683		1.34303	179494	.	.	104966	51388		2.04262	569291	.	.	316915	223146		1.42021	345922	.	.	192018
HG002	30	INDEL	ONT	0.752174	0.773481	0.762679	clair3	ALL	*	QUAL	*	0.416039	12728	59930	2809091522	2546949881	0	525466	.	.	296594	194071		1.52828	395242	.	.	218189	162420		1.34336	130224	.	.	78405	31651		2.47717	874764	.	.	456739	342993		1.33163	395116	.	.	218653
HG002	30	INDEL	ONT	0.684463	0.901319	0.778064	clair3	PASS	*	QUAL	*	0.318752	3425	26521	2809091522	2546949881	0	525466	.	.	296594	194071		1.52828	359662	.	.	200299	146715		1.36523	165804	.	.	96295	47356		2.03343	585622	.	.	327530	227541		1.43943	359585	.	.	200741
HG00733	5	INDEL	ONT	0.363353	0.407357	0.384099	clair3	ALL	*	QUAL	*	0.421209	31595	96131	3031399176	2546864659	0	524636	.	.	315538	208857		1.51078	190628	.	.	87367	103261		0.846079	334008	.	.	228171	105596		2.16079	803293	.	.	375968	380364		0.988443	189396	.	.	84712
HG00733	5	INDEL	ONT	0.27865	0.717867	0.401466	clair3	PASS	*	QUAL	*	0.321255	10291	25593	3031399176	2546864659	0	524636	.	.	315538	208857		1.51078	146190	.	.	65043	81147		0.801545	378446	.	.	250495	127710		1.96144	298209	.	.	134951	154319		0.874494	145302	.	.	63072
HG00733	8	INDEL	ONT	0.498235	0.461787	0.479319	clair3	ALL	*	QUAL	*	0.418333	29544	108263	3031399176	2546864659	0	524706	.	.	315538	208857		1.51078	261427	.	.	133334	128093		1.04092	263279	.	.	182204	80764		2.25601	966236	.	.	465744	437960		1.06344	259537	.	.	129199
HG00733	8	INDEL	ONT	0.402204	0.753099	0.524364	clair3	PASS	*	QUAL	*	0.315448	8700	34265	3031399176	2546864659	0	524706	.	.	315538	208857		1.51078	211039	.	.	106611	104428		1.0209	313667	.	.	208927	104429		2.00066	406333	.	.	202511	188741		1.07296	209479	.	.	103152
HG00733	10	INDEL	ONT	0.552873	0.497346	0.523642	clair3	ALL	*	QUAL	*	0.418434	27834	105883	3031399176	2546864659	0	524719	.	.	315538	208857		1.51078	290103	.	.	153139	136964		1.1181	234616	.	.	162399	71893		2.2589	994881	.	.	482991	444866		1.0857	287759	.	.	148031
HG00733	10	INDEL	ONT	0.456614	0.767939	0.572701	clair3	PASS	*	QUAL	*	0.316212	7999	36991	3031399176	2546864659	0	524719	.	.	315538	208857		1.51078	239594	.	.	125905	113689		1.10745	285125	.	.	189633	95168		1.99261	452431	.	.	231765	202393		1.14512	237575	.	.	121472
HG00733	12	INDEL	ONT	0.589216	0.529515	0.557772	clair3	ALL	*	QUAL	*	0.419126	25941	101801	3031399176	2546864659	0	524728	.	.	315538	208857		1.51078	309178	.	.	166491	142687		1.16683	215550	.	.	149047	66170		2.25249	996195	.	.	486965	439754		1.10736	306411	.	.	160547
HG00733	12	INDEL	ONT	0.496116	0.778069	0.605897	clair3	PASS	*	QUAL	*	0.317036	7691	38680	3031399176	2546864659	0	524728	.	.	315538	208857		1.51078	260326	.	.	140295	120031		1.16882	264402	.	.	175243	88826		1.97288	485238	.	.	253077	210918		1.19988	257852	.	.	134939
HG00733	15	INDEL	ONT	0.625901	0.570102	0.5967	clair3	ALL	*	QUAL	*	0.418513	24712	94607	3031399176	2546864659	0	524751	.	.	315538	208857		1.51078	328442	.	.	180341	148101		1.21769	196309	.	.	135197	60756		2.22525	981026	.	.	483681	425696		1.13621	325217	.	.	173379
HG00733	15	INDEL	ONT	0.536881	0.788162	0.638695	clair3	PASS	*	QUAL	*	0.316879	7550	40102	3031399176	2546864659	0	524751	.	.	315538	208857		1.51078	281729	.	.	155220	126509		1.22695	243022	.	.	160318	82348		1.94684	517771	.	.	274436	218921		1.25358	278773	.	.	148794
HG00733	17	INDEL	ONT	0.643407	0.593735	0.617574	clair3	ALL	*	QUAL	*	0.419016	23466	89949	3031399176	2546864659	0	524749	.	.	315538	208857		1.51078	337627	.	.	186703	150924		1.23707	187122	.	.	128835	57933		2.22386	968533	.	.	479191	416947		1.14929	334096	.	.	179159
HG00733	17	INDEL	ONT	0.558099	0.794983	0.655805	clair3	PASS	*	QUAL	*	0.319108	7377	40234	3031399176	2546864659	0	524749	.	.	315538	208857		1.51078	292862	.	.	162836	130026		1.25233	231887	.	.	152702	78831		1.93708	534935	.	.	285579	223241		1.27924	289559	.	.	155743
HG00733	20	INDEL	ONT	0.66503	0.624243	0.643992	clair3	ALL	*	QUAL	*	0.417795	22344	84230	3031399176	2546864659	0	524758	.	.	315538	208857		1.51078	348980	.	.	194992	153988		1.26628	175778	.	.	120546	54869		2.19698	949593	.	.	472664	403721		1.17077	345118	.	.	186785
HG00733	20	INDEL	ONT	0.584107	0.801061	0.675594	clair3	PASS	*	QUAL	*	0.318248	7492	40922	3031399176	2546864659	0	524758	.	.	315538	208857		1.51078	306515	.	.	172222	134293		1.28243	218243	.	.	143316	74564		1.92205	554631	.	.	298137	228621		1.30407	302898	.	.	164499
HG00733	25	INDEL	ONT	0.68844	0.662433	0.675186	clair3	ALL	*	QUAL	*	0.416651	20371	76993	3031399176	2546864659	0	524763	.	.	315538	208857		1.51078	361268	.	.	203658	157610		1.29216	163495	.	.	111880	51247		2.18315	924070	.	.	460831	389874		1.182	357088	.	.	194797
HG00733	25	INDEL	ONT	0.615867	0.810197	0.699791	clair3	PASS	*	QUAL	*	0.318569	7553	41037	3031399176	2546864659	0	524763	.	.	315538	208857		1.51078	323184	.	.	183322	139862		1.31073	201579	.	.	132216	68995		1.91631	578183	.	.	312284	235791		1.32441	319211	.	.	174851
HG00733	30	INDEL	ONT	0.704419	0.690684	0.697484	clair3	ALL	*	QUAL	*	0.415505	18955	71760	3031399176	2546864659	0	524770	.	.	315538	208857		1.51078	369658	.	.	209640	160018		1.3101	155112	.	.	105898	48839		2.16831	904484	.	.	452392	378207		1.19615	365141	.	.	200069
HG00733	30	INDEL	ONT	0.638253	0.816518	0.716463	clair3	PASS	*	QUAL	*	0.319713	7467	40958	3031399176	2546864659	0	524770	.	.	315538	208857		1.51078	334936	.	.	191196	143740		1.33015	189834	.	.	124342	65117		1.90952	595206	.	.	322643	241076		1.33835	330617	.	.	182025
HG002	5	INDEL	UL-ONT	0.379712	0.423275	0.400312	clair3	ALL	*	QUAL	*	0.40879	31089	102088	2809091522	2546949881	0	525466	.	.	296594	194071		1.52828	199526	.	.	94308	100992		0.933817	325940	.	.	202286	93079		2.17327	797021	.	.	433403	311480		1.39143	199450	.	.	94329
HG002	5	INDEL	UL-ONT	0.292462	0.771533	0.424145	clair3	PASS	*	QUAL	*	0.314383	8692	22127	2809091522	2546949881	0	525466	.	.	296594	194071		1.52828	153679	.	.	70843	80216		0.883153	371787	.	.	225751	113855		1.98279	290429	.	.	141344	139992		1.00966	153630	.	.	70844
HG002	8	INDEL	UL-ONT	0.522127	0.48051	0.500455	clair3	ALL	*	QUAL	*	0.407804	28505	112299	2809091522	2546949881	0	525466	.	.	296594	194071		1.52828	274360	.	.	143274	124299		1.15266	251106	.	.	153320	69772		2.19744	964011	.	.	547677	344873		1.58805	274315	.	.	143411
HG002	8	INDEL	UL-ONT	0.419964	0.815405	0.554395	clair3	PASS	*	QUAL	*	0.312237	6170	27221	2809091522	2546949881	0	525466	.	.	296594	194071		1.52828	220677	.	.	114262	101634		1.12425	304789	.	.	182332	92437		1.9725	393477	.	.	212089	166113		1.27678	220664	.	.	114361
HG002	10	INDEL	UL-ONT	0.582628	0.52042	0.54977	clair3	ALL	*	QUAL	*	0.409826	25923	108086	2809091522	2546949881	0	525466	.	.	296594	194071		1.52828	306151	.	.	163747	134081		1.22125	219315	.	.	132847	59990		2.21449	996635	.	.	566926	352827		1.60681	306105	.	.	163936
HG002	10	INDEL	UL-ONT	0.478058	0.833898	0.607721	clair3	PASS	*	QUAL	*	0.314735	5079	28417	2809091522	2546949881	0	525466	.	.	296594	194071		1.52828	251203	.	.	133792	111198		1.20319	274263	.	.	162802	82873		1.96448	439608	.	.	242885	178044		1.36419	251210	.	.	133957
HG002	12	INDEL	UL-ONT	0.62252	0.557937	0.588462	clair3	ALL	*	QUAL	*	0.411789	24010	102075	2809091522	2546949881	0	525466	.	.	296594	194071		1.52828	327113	.	.	177354	140383		1.26336	198353	.	.	119240	53688		2.22098	996545	.	.	563516	353312		1.59495	327051	.	.	177586
HG002	12	INDEL	UL-ONT	0.519221	0.846285	0.643584	clair3	PASS	*	QUAL	*	0.315833	4469	29101	2809091522	2546949881	0	525466	.	.	296594	194071		1.52828	272833	.	.	147831	117683		1.25618	252633	.	.	148763	76388		1.94747	471195	.	.	263350	186330		1.41335	272822	.	.	148025
HG002	15	INDEL	UL-ONT	0.664247	0.608762	0.635295	clair3	ALL	*	QUAL	*	0.413629	21208	91894	2809091522	2546949881	0	525466	.	.	296594	194071		1.52828	349039	.	.	191268	146937		1.3017	176427	.	.	105326	47134		2.23461	977587	.	.	548433	348744		1.57259	348960	.	.	191531
HG002	15	INDEL	UL-ONT	0.56396	0.86261	0.682024	clair3	PASS	*	QUAL	*	0.316656	4008	28318	2809091522	2546949881	0	525466	.	.	296594	194071		1.52828	296342	.	.	162710	124863		1.30311	229124	.	.	133884	69208		1.93452	502690	.	.	283421	194885		1.4543	296315	.	.	162936
HG002	17	INDEL	UL-ONT	0.684303	0.637464	0.660054	clair3	ALL	*	QUAL	*	0.414572	20004	86105	2809091522	2546949881	0	525466	.	.	296594	194071		1.52828	359578	.	.	197740	150164		1.31683	165888	.	.	98854	43907		2.25144	963331	.	.	538393	344672		1.56204	359505	.	.	198072
HG002	17	INDEL	UL-ONT	0.587343	0.870708	0.70149	clair3	PASS	*	QUAL	*	0.317197	3690	27928	2809091522	2546949881	0	525466	.	.	296594	194071		1.52828	308629	.	.	170381	128642		1.32446	216837	.	.	126213	65429		1.92901	519103	.	.	293830	199423		1.4734	308618	.	.	170683
HG002	20	INDEL	UL-ONT	0.709047	0.676579	0.692432	clair3	ALL	*	QUAL	*	0.415122	17969	77887	2809091522	2546949881	0	525466	.	.	296594	194071		1.52828	372580	.	.	205587	154274		1.33261	152886	.	.	91007	39797		2.28678	941332	.	.	522050	339279		1.5387	372500	.	.	205954
HG002	20	INDEL	UL-ONT	0.616194	0.88192	0.72549	clair3	PASS	*	QUAL	*	0.317708	3481	26811	2809091522	2546949881	0	525466	.	.	296594	194071		1.52828	323789	.	.	179681	133472		1.34621	201677	.	.	116913	60599		1.92929	538048	.	.	305435	205001		1.48992	323758	.	.	180018
HG002	25	INDEL	UL-ONT	0.736354	0.724233	0.730243	clair3	ALL	*	QUAL	*	0.414687	15591	68458	2809091522	2546949881	0	525466	.	.	296594	194071		1.52828	386929	.	.	214222	158629		1.35046	138537	.	.	82372	35442		2.32414	912565	.	.	501238	331995		1.50978	386839	.	.	214673
HG002	25	INDEL	UL-ONT	0.650339	0.894088	0.752979	clair3	PASS	*	QUAL	*	0.318273	3259	25678	2809091522	2546949881	0	525466	.	.	296594	194071		1.52828	341731	.	.	190694	139086		1.37105	183735	.	.	105900	54985		1.92598	560588	.	.	319184	211971		1.50579	341692	.	.	191123
HG002	30	INDEL	UL-ONT	0.757324	0.766805	0.762035	clair3	ALL	*	QUAL	*	0.413245	13292	60495	2809091522	2546949881	0	525466	.	.	296594	194071		1.52828	397948	.	.	219317	163438		1.3419	127518	.	.	77277	30633		2.52267	884260	.	.	472515	335349		1.40902	397852	.	.	219813
HG002	30	INDEL	UL-ONT	0.679197	0.903885	0.775596	clair3	PASS	*	QUAL	*	0.317922	3154	24682	2809091522	2546949881	0	525466	.	.	296594	194071		1.52828	356895	.	.	198620	145187		1.36803	168571	.	.	97974	48884		2.00421	578802	.	.	326732	221516		1.47498	356843	.	.	199084
HG00733	5	INDEL	UL-ONT	0.379697	0.392118	0.385808	clair3	ALL	*	QUAL	*	0.411345	33427	103092	3031399176	2546864659	0	524637	.	.	315538	208857		1.51078	199203	.	.	97005	102198		0.949187	325434	.	.	218533	106659		2.04889	857166	.	.	444144	350181		1.26833	197853	.	.	94084
HG00733	5	INDEL	UL-ONT	0.294777	0.730699	0.420085	clair3	PASS	*	QUAL	*	0.321909	9871	25815	3031399176	2546864659	0	524637	.	.	315538	208857		1.51078	154651	.	.	73261	81390		0.900123	369986	.	.	242277	127467		1.9007	310097	.	.	150633	149028		1.01077	153647	.	.	71045
HG00733	8	INDEL	UL-ONT	0.515437	0.433536	0.470953	clair3	ALL	*	QUAL	*	0.409561	31468	117417	3031399176	2546864659	0	524698	.	.	315538	208857		1.51078	270449	.	.	145877	124572		1.17103	254249	.	.	169661	84285		2.01294	1047912	.	.	570012	390310		1.46041	268241	.	.	141071
HG00733	8	INDEL	UL-ONT	0.420897	0.75968	0.54168	clair3	PASS	*	QUAL	*	0.318361	7925	34247	3031399176	2546864659	0	524698	.	.	315538	208857		1.51078	220844	.	.	117634	103210		1.13975	303854	.	.	197904	105647		1.87326	422944	.	.	227394	178157		1.27637	219012	.	.	113566
HG00733	10	INDEL	UL-ONT	0.566268	0.460342	0.50784	clair3	ALL	*	QUAL	*	0.409538	29352	117242	3031399176	2546864659	0	524727	.	.	315538	208857		1.51078	297136	.	.	164609	132527		1.24208	227591	.	.	150929	76330		1.97732	1083927	.	.	590157	399351		1.47779	294627	.	.	159159
HG00733	10	INDEL	UL-ONT	0.471493	0.766667	0.583895	clair3	PASS	*	QUAL	*	0.319073	7407	37831	3031399176	2546864659	0	524727	.	.	315538	208857		1.51078	247405	.	.	135962	111443		1.22001	277322	.	.	179576	97414		1.84343	469648	.	.	258046	190647		1.35353	245177	.	.	131092
HG00733	12	INDEL	UL-ONT	0.601508	0.485097	0.537067	clair3	ALL	*	QUAL	*	0.410043	27525	113953	3031399176	2546864659	0	524723	.	.	315538	208857		1.51078	315625	.	.	177667	137958		1.28783	209098	.	.	137871	70899		1.94461	1092670	.	.	591992	403180		1.46831	312707	.	.	171352
HG00733	12	INDEL	UL-ONT	0.509555	0.773013	0.614225	clair3	PASS	*	QUAL	*	0.320553	6951	39578	3031399176	2546864659	0	524723	.	.	315538	208857		1.51078	267375	.	.	150001	117374		1.27797	257348	.	.	165537	91483		1.80948	503957	.	.	280534	199644		1.40517	264689	.	.	144172
HG00733	15	INDEL	UL-ONT	0.63542	0.517889	0.570666	clair3	ALL	*	QUAL	*	0.410929	25411	108289	3031399176	2546864659	0	524744	.	.	315538	208857		1.51078	333433	.	.	190621	142812		1.33477	191311	.	.	124917	66045		1.89139	1081868	.	.	581522	400960		1.45032	330049	.	.	183353
HG00733	15	INDEL	UL-ONT	0.549089	0.778254	0.643889	clair3	PASS	*	QUAL	*	0.321269	6831	41732	3031399176	2546864659	0	524744	.	.	315538	208857		1.51078	288131	.	.	164601	123530		1.33248	236613	.	.	150937	85327		1.76892	539448	.	.	302810	209384		1.44619	284950	.	.	157738
HG00733	17	INDEL	UL-ONT	0.652612	0.536271	0.588749	clair3	ALL	*	QUAL	*	0.410933	24361	104127	3031399176	2546864659	0	524748	.	.	315538	208857		1.51078	342457	.	.	197078	145379		1.35562	182291	.	.	118460	63478		1.86616	1072624	.	.	573627	399478		1.43594	338841	.	.	189317
HG00733	17	INDEL	UL-ONT	0.569273	0.779744	0.65809	clair3	PASS	*	QUAL	*	0.321907	6896	42433	3031399176	2546864659	0	524748	.	.	315538	208857		1.51078	298725	.	.	172171	126554		1.36045	226023	.	.	143367	82303		1.74194	558478	.	.	314672	214835		1.46471	295289	.	.	164755
HG00733	20	INDEL	UL-ONT	0.669706	0.557357	0.608388	clair3	ALL	*	QUAL	*	0.410329	22841	100274	3031399176	2546864659	0	524747	.	.	315538	208857		1.51078	351426	.	.	203533	147893		1.37622	173321	.	.	112005	60964		1.83723	1057113	.	.	559643	397020		1.40961	347428	.	.	195026
HG00733	20	INDEL	UL-ONT	0.591678	0.781277	0.673386	clair3	PASS	*	QUAL	*	0.322331	6960	43508	3031399176	2546864659	0	524747	.	.	315538	208857		1.51078	310481	.	.	180272	130209		1.38448	214266	.	.	135266	78648		1.71989	579200	.	.	326691	221927		1.47207	306656	.	.	172097
HG00733	25	INDEL	UL-ONT	0.688612	0.583226	0.631553	clair3	ALL	*	QUAL	*	0.40963	21107	94679	3031399176	2546864659	0	524753	.	.	315538	208857		1.51078	361351	.	.	210977	150374		1.40302	163402	.	.	104561	58483		1.78789	1036953	.	.	540398	396426		1.36317	357043	.	.	201816
HG00733	25	INDEL	UL-ONT	0.61976	0.781141	0.691155	clair3	PASS	*	QUAL	*	0.322449	7343	44770	3031399176	2546864659	0	524753	.	.	315538	208857		1.51078	325221	.	.	190575	134646		1.41538	199532	.	.	124963	74211		1.68389	606589	.	.	341922	232115		1.47307	321045	.	.	181681
HG00733	30	INDEL	UL-ONT	0.699282	0.600479	0.646125	clair3	ALL	*	QUAL	*	0.408544	19793	91994	3031399176	2546864659	0	524758	.	.	315538	208857		1.51078	366954	.	.	215213	151741		1.41829	157804	.	.	100325	57116		1.75651	1020363	.	.	525755	394249		1.33356	362389	.	.	205560
HG00733	30	INDEL	UL-ONT	0.638012	0.778687	0.701365	clair3	PASS	*	QUAL	*	0.322452	7646	46502	3031399176	2546864659	0	524758	.	.	315538	208857		1.51078	334802	.	.	196991	137811		1.42943	189956	.	.	118547	71046		1.66859	626214	.	.	352473	239790		1.46992	330389	.	.	187635
HG002	5	INDEL	HiFi	0.6158	0.853392	0.715385	deepvariant	ALL	*	GQ	*	0.368205	26396	24169	2809091522	2546949881	0	525466	.	.	296594	194071		1.52828	323582	.	.	148640	165038		0.900641	201884	.	.	147954	29033		5.09606	597596	.	.	264059	300552		0.87858	322205	.	.	148237
HG002	5	INDEL	HiFi	0.6158	0.853392	0.715385	deepvariant	PASS	*	GQ	*	0.368205	26396	24169	2809091522	2546949881	0	525466	.	.	296594	194071		1.52828	323582	.	.	148640	165038		0.900641	201884	.	.	147954	29033		5.09606	597596	.	.	264059	300552		0.87858	322205	.	.	148237
HG002	8	INDEL	HiFi	0.79766	0.907643	0.849105	deepvariant	ALL	*	GQ	*	0.387563	16246	21822	2809091522	2546949881	0	525466	.	.	296594	194071		1.52828	419143	.	.	219489	180444		1.21638	106323	.	.	77105	13627		5.65825	750637	.	.	382979	307418		1.24579	417260	.	.	218969
HG002	8	INDEL	HiFi	0.79766	0.907643	0.849105	deepvariant	PASS	*	GQ	*	0.387563	16246	21822	2809091522	2546949881	0	525466	.	.	296594	194071		1.52828	419143	.	.	219489	180444		1.21638	106323	.	.	77105	13627		5.65825	750637	.	.	382979	307418		1.24579	417260	.	.	218969
HG002	10	INDEL	HiFi	0.860229	0.929569	0.893556	deepvariant	ALL	*	GQ	*	0.395558	11730	18652	2809091522	2546949881	0	525466	.	.	296594	194071		1.52828	452021	.	.	244502	184045		1.32849	73445	.	.	52092	10026		5.19569	800957	.	.	424676	304807		1.39326	450034	.	.	244084
HG002	10	INDEL	HiFi	0.860229	0.929569	0.893556	deepvariant	PASS	*	GQ	*	0.395558	11730	18652	2809091522	2546949881	0	525466	.	.	296594	194071		1.52828	452021	.	.	244502	184045		1.32849	73445	.	.	52092	10026		5.19569	800957	.	.	424676	304807		1.39326	450034	.	.	244084
HG002	12	INDEL	HiFi	0.900296	0.944727	0.921977	deepvariant	ALL	*	GQ	*	0.400824	8577	15912	2809091522	2546949881	0	525466	.	.	296594	194071		1.52828	473075	.	.	260420	186366		1.39736	52391	.	.	36174	7705		4.69487	831962	.	.	450562	303472		1.48469	470939	.	.	259998
HG002	12	INDEL	HiFi	0.900296	0.944727	0.921977	deepvariant	PASS	*	GQ	*	0.400824	8577	15912	2809091522	2546949881	0	525466	.	.	296594	194071		1.52828	473075	.	.	260420	186366		1.39736	52391	.	.	36174	7705		4.69487	831962	.	.	450562	303472		1.48469	470939	.	.	259998
HG002	15	INDEL	HiFi	0.933973	0.959006	0.946324	deepvariant	ALL	*	GQ	*	0.406181	5959	12539	2809091522	2546949881	0	525466	.	.	296594	194071		1.52828	490771	.	.	273714	188205		1.45434	34695	.	.	22880	5866		3.90044	857896	.	.	473742	301578		1.57088	488551	.	.	273296
HG002	15	INDEL	HiFi	0.933973	0.959006	0.946324	deepvariant	PASS	*	GQ	*	0.406181	5959	12539	2809091522	2546949881	0	525466	.	.	296594	194071		1.52828	490771	.	.	273714	188205		1.45434	34695	.	.	22880	5866		3.90044	857896	.	.	473742	301578		1.57088	488551	.	.	273296
HG002	17	INDEL	HiFi	0.949074	0.966213	0.957567	deepvariant	ALL	*	GQ	*	0.408382	4591	10721	2809091522	2546949881	0	525466	.	.	296594	194071		1.52828	498706	.	.	279499	189179		1.47743	26760	.	.	17095	4892		3.49448	868524	.	.	483649	301315		1.60513	496473	.	.	279121
HG002	17	INDEL	HiFi	0.949074	0.966213	0.957567	deepvariant	PASS	*	GQ	*	0.408382	4591	10721	2809091522	2546949881	0	525466	.	.	296594	194071		1.52828	498706	.	.	279499	189179		1.47743	26760	.	.	17095	4892		3.49448	868524	.	.	483649	301315		1.60513	496473	.	.	279121
HG002	20	INDEL	HiFi	0.962312	0.973853	0.968048	deepvariant	ALL	*	GQ	*	0.4114	3380	8555	2809091522	2546949881	0	525466	.	.	296594	194071		1.52828	505662	.	.	284305	190281		1.49413	19804	.	.	12289	3790		3.24248	878156	.	.	492267	301633		1.63201	503368	.	.	283892
HG002	20	INDEL	HiFi	0.962312	0.973853	0.968048	deepvariant	PASS	*	GQ	*	0.4114	3380	8555	2809091522	2546949881	0	525466	.	.	296594	194071		1.52828	505662	.	.	284305	190281		1.49413	19804	.	.	12289	3790		3.24248	878156	.	.	492267	301633		1.63201	503368	.	.	283892
HG002	25	INDEL	HiFi	0.975972	0.981942	0.978948	deepvariant	ALL	*	GQ	*	0.414753	2127	6268	2809091522	2546949881	0	525466	.	.	296594	194071		1.52828	512840	.	.	289237	191363		1.51146	12626	.	.	7357	2708		2.71677	888393	.	.	501644	301964		1.66127	510540	.	.	288888
HG002	25	INDEL	HiFi	0.975972	0.981942	0.978948	deepvariant	PASS	*	GQ	*	0.414753	2127	6268	2809091522	2546949881	0	525466	.	.	296594	194071		1.52828	512840	.	.	289237	191363		1.51146	12626	.	.	7357	2708		2.71677	888393	.	.	501644	301964		1.66127	510540	.	.	288888
HG002	30	INDEL	HiFi	0.983171	0.986488	0.984827	deepvariant	ALL	*	GQ	*	0.417296	1495	4815	2809091522	2546949881	0	525466	.	.	296594	194071		1.52828	516623	.	.	291656	192039		1.51873	8843	.	.	4938	2032		2.43012	894660	.	.	507197	302835		1.67483	514278	.	.	291296
HG002	30	INDEL	HiFi	0.983171	0.986488	0.984827	deepvariant	PASS	*	GQ	*	0.417296	1495	4815	2809091522	2546949881	0	525466	.	.	296594	194071		1.52828	516623	.	.	291656	192039		1.51873	8843	.	.	4938	2032		2.43012	894660	.	.	507197	302835		1.67483	514278	.	.	291296
HG00733	5	INDEL	HiFi	0.581291	0.759188	0.658435	deepvariant	ALL	*	GQ	*	0.37686	31102	33168	3031399176	2546864659	0	524729	.	.	315538	208857		1.51078	305020	.	.	146244	158776		0.921071	219709	.	.	169294	50081		3.3804	634902	.	.	279732	316455		0.883955	300360	.	.	139426
HG00733	5	INDEL	HiFi	0.581291	0.759188	0.658435	deepvariant	PASS	*	GQ	*	0.37686	31102	33168	3031399176	2546864659	0	524729	.	.	315538	208857		1.51078	305020	.	.	146244	158776		0.921071	219709	.	.	169294	50081		3.3804	634902	.	.	279732	316455		0.883955	300360	.	.	139426
HG00733	8	INDEL	HiFi	0.737138	0.780661	0.758275	deepvariant	ALL	*	GQ	*	0.39313	23110	43695	3031399176	2546864659	0	524750	.	.	315538	208857		1.51078	386813	.	.	215319	171494		1.25555	137937	.	.	100219	37363		2.68231	800503	.	.	409126	320211		1.27768	379246	.	.	203258
HG00733	8	INDEL	HiFi	0.737138	0.780661	0.758275	deepvariant	PASS	*	GQ	*	0.39313	23110	43695	3031399176	2546864659	0	524750	.	.	315538	208857		1.51078	386813	.	.	215319	171494		1.25555	137937	.	.	100219	37363		2.68231	800503	.	.	409126	320211		1.27768	379246	.	.	203258
HG00733	10	INDEL	HiFi	0.788789	0.78933	0.789059	deepvariant	ALL	*	GQ	*	0.399424	19113	46572	3031399176	2546864659	0	524759	.	.	315538	208857		1.51078	413924	.	.	239882	174042		1.3783	110835	.	.	75656	34815		2.17309	854507	.	.	455335	314827		1.4463	405081	.	.	225535
HG00733	10	INDEL	HiFi	0.788789	0.78933	0.789059	deepvariant	PASS	*	GQ	*	0.399424	19113	46572	3031399176	2546864659	0	524759	.	.	315538	208857		1.51078	413924	.	.	239882	174042		1.3783	110835	.	.	75656	34815		2.17309	854507	.	.	455335	314827		1.4463	405081	.	.	225535
HG00733	12	INDEL	HiFi	0.81927	0.793607	0.806235	deepvariant	ALL	*	GQ	*	0.403863	16838	48293	3031399176	2546864659	0	524766	.	.	315538	208857		1.51078	429925	.	.	254803	175122		1.455	94841	.	.	60735	33735		1.80036	888358	.	.	484666	311057		1.55813	420281	.	.	238992
HG00733	12	INDEL	HiFi	0.81927	0.793607	0.806235	deepvariant	PASS	*	GQ	*	0.403863	16838	48293	3031399176	2546864659	0	524766	.	.	315538	208857		1.51078	429925	.	.	254803	175122		1.455	94841	.	.	60735	33735		1.80036	888358	.	.	484666	311057		1.55813	420281	.	.	238992
HG00733	15	INDEL	HiFi	0.845923	0.799897	0.822266	deepvariant	ALL	*	GQ	*	0.407886	14662	48375	3031399176	2546864659	0	524775	.	.	315538	208857		1.51078	443919	.	.	267591	176328		1.51758	80856	.	.	47947	32529		1.47398	915730	.	.	509859	307793		1.6565	433718	.	.	250713
HG00733	15	INDEL	HiFi	0.845923	0.799897	0.822266	deepvariant	PASS	*	GQ	*	0.407886	14662	48375	3031399176	2546864659	0	524775	.	.	315538	208857		1.51078	443919	.	.	267591	176328		1.51758	80856	.	.	47947	32529		1.47398	915730	.	.	509859	307793		1.6565	433718	.	.	250713
HG00733	17	INDEL	HiFi	0.855891	0.802774	0.828482	deepvariant	ALL	*	GQ	*	0.409864	13663	48415	3031399176	2546864659	0	524771	.	.	315538	208857		1.51078	449147	.	.	272300	176847		1.53975	75624	.	.	43238	32010		1.35077	926056	.	.	519423	306757		1.69327	438715	.	.	255042
HG00733	17	INDEL	HiFi	0.855891	0.802774	0.828482	deepvariant	PASS	*	GQ	*	0.409864	13663	48415	3031399176	2546864659	0	524771	.	.	315538	208857		1.51078	449147	.	.	272300	176847		1.53975	75624	.	.	43238	32010		1.35077	926056	.	.	519423	306757		1.69327	438715	.	.	255042
HG00733	20	INDEL	HiFi	0.867563	0.806868	0.836116	deepvariant	ALL	*	GQ	*	0.411549	12659	47887	3031399176	2546864659	0	524778	.	.	315538	208857		1.51078	455278	.	.	277733	177545		1.5643	69500	.	.	37805	31312		1.20736	936404	.	.	529587	305597		1.73296	444607	.	.	260000
HG00733	20	INDEL	HiFi	0.867563	0.806868	0.836116	deepvariant	PASS	*	GQ	*	0.411549	12659	47887	3031399176	2546864659	0	524778	.	.	315538	208857		1.51078	455278	.	.	277733	177545		1.5643	69500	.	.	37805	31312		1.20736	936404	.	.	529587	305597		1.73296	444607	.	.	260000
HG00733	25	INDEL	HiFi	0.877854	0.812259	0.843784	deepvariant	ALL	*	GQ	*	0.414124	11416	47125	3031399176	2546864659	0	524774	.	.	315538	208857		1.51078	460675	.	.	282249	178426		1.58188	64099	.	.	33289	30431		1.09392	945190	.	.	537514	305656		1.75856	449800	.	.	264136
HG00733	25	INDEL	HiFi	0.877854	0.812259	0.843784	deepvariant	PASS	*	GQ	*	0.414124	11416	47125	3031399176	2546864659	0	524774	.	.	315538	208857		1.51078	460675	.	.	282249	178426		1.58188	64099	.	.	33289	30431		1.09392	945190	.	.	537514	305656		1.75856	449800	.	.	264136
HG00733	30	INDEL	HiFi	0.884193	0.816085	0.848775	deepvariant	ALL	*	GQ	*	0.415633	10881	46322	3031399176	2546864659	0	524778	.	.	315538	208857		1.51078	464005	.	.	284948	179057		1.59138	60773	.	.	30590	29800		1.02651	949917	.	.	542128	305384		1.77523	453009	.	.	266646
HG00733	30	INDEL	HiFi	0.884193	0.816085	0.848775	deepvariant	PASS	*	GQ	*	0.415633	10881	46322	3031399176	2546864659	0	524778	.	.	315538	208857		1.51078	464005	.	.	284948	179057		1.59138	60773	.	.	30590	29800		1.02651	949917	.	.	542128	305384		1.77523	453009	.	.	266646
HG002	5	INDEL	ONT	0.188338	0.782198	0.303579	deepvariant	ALL	*	GQ	*	0.253762	12406	11860	2809091522	2546949881	0	525466	.	.	296594	194071		1.52828	98965	.	.	28408	69133		0.410918	426501	.	.	268186	124938		2.14655	169474	.	.	46785	118670		0.394245	98923	.	.	28416
HG002	5	INDEL	ONT	0.188338	0.782198	0.303579	deepvariant	PASS	*	GQ	*	0.253762	12406	11860	2809091522	2546949881	0	525466	.	.	296594	194071		1.52828	98965	.	.	28408	69133		0.410918	426501	.	.	268186	124938		2.14655	169474	.	.	46785	118670		0.394245	98923	.	.	28416
HG002	8	INDEL	ONT	0.366926	0.817541	0.506518	deepvariant	ALL	*	GQ	*	0.266621	11948	23492	2809091522	2546949881	0	525466	.	.	296594	194071		1.52828	192807	.	.	83305	104868		0.79438	332659	.	.	213289	89203		2.39105	321475	.	.	136906	169475		0.807824	192746	.	.	83407
HG002	8	INDEL	ONT	0.366926	0.817541	0.506518	deepvariant	PASS	*	GQ	*	0.266621	11948	23492	2809091522	2546949881	0	525466	.	.	296594	194071		1.52828	192807	.	.	83305	104868		0.79438	332659	.	.	213289	89203		2.39105	321475	.	.	136906	169475		0.807824	192746	.	.	83407
HG002	10	INDEL	ONT	0.453236	0.826231	0.585365	deepvariant	ALL	*	GQ	*	0.277031	10079	29454	2809091522	2546949881	0	525466	.	.	296594	194071		1.52828	238160	.	.	115625	115774		0.998713	287306	.	.	180969	78297		2.31131	398609	.	.	193170	181703		1.06311	238105	.	.	115802
HG002	10	INDEL	ONT	0.453236	0.826231	0.585365	deepvariant	PASS	*	GQ	*	0.277031	10079	29454	2809091522	2546949881	0	525466	.	.	296594	194071		1.52828	238160	.	.	115625	115774		0.998713	287306	.	.	180969	78297		2.31131	398609	.	.	193170	181703		1.06311	238105	.	.	115802
HG002	12	INDEL	ONT	0.515822	0.827575	0.635525	deepvariant	ALL	*	GQ	*	0.283226	9334	33910	2809091522	2546949881	0	525466	.	.	296594	194071		1.52828	271047	.	.	138788	123689		1.12207	254419	.	.	157806	70382		2.24214	456802	.	.	234168	191123		1.22522	270968	.	.	138968
HG002	12	INDEL	ONT	0.515822	0.827575	0.635525	deepvariant	PASS	*	GQ	*	0.283226	9334	33910	2809091522	2546949881	0	525466	.	.	296594	194071		1.52828	271047	.	.	138788	123689		1.12207	254419	.	.	157806	70382		2.24214	456802	.	.	234168	191123		1.22522	270968	.	.	138968
HG002	15	INDEL	ONT	0.575166	0.822801	0.67705	deepvariant	ALL	*	GQ	*	0.290733	9189	38805	2809091522	2546949881	0	525466	.	.	296594	194071		1.52828	302230	.	.	160007	131701		1.21493	223236	.	.	136587	62370		2.18995	517778	.	.	273153	204081		1.33845	302168	.	.	160294
HG002	15	INDEL	ONT	0.575166	0.822801	0.67705	deepvariant	PASS	*	GQ	*	0.290733	9189	38805	2809091522	2546949881	0	525466	.	.	296594	194071		1.52828	302230	.	.	160007	131701		1.21493	223236	.	.	136587	62370		2.18995	517778	.	.	273153	204081		1.33845	302168	.	.	160294
HG002	17	INDEL	ONT	0.603398	0.820845	0.695522	deepvariant	ALL	*	GQ	*	0.293165	9508	40398	2809091522	2546949881	0	525466	.	.	296594	194071		1.52828	317065	.	.	169978	135583		1.25368	208401	.	.	126616	58488		2.16482	546351	.	.	290556	211849		1.37152	316994	.	.	170328
HG002	17	INDEL	ONT	0.603398	0.820845	0.695522	deepvariant	PASS	*	GQ	*	0.293165	9508	40398	2809091522	2546949881	0	525466	.	.	296594	194071		1.52828	317065	.	.	169978	135583		1.25368	208401	.	.	126616	58488		2.16482	546351	.	.	290556	211849		1.37152	316994	.	.	170328
HG002	20	INDEL	ONT	0.633388	0.81859	0.714178	deepvariant	ALL	*	GQ	*	0.294798	9882	41955	2809091522	2546949881	0	525466	.	.	296594	194071		1.52828	332824	.	.	180394	140065		1.28793	192642	.	.	116200	54006		2.15161	576421	.	.	308072	221015		1.3939	332751	.	.	180731
HG002	20	INDEL	ONT	0.633388	0.81859	0.714178	deepvariant	PASS	*	GQ	*	0.294798	9882	41955	2809091522	2546949881	0	525466	.	.	296594	194071		1.52828	332824	.	.	180394	140065		1.28793	192642	.	.	116200	54006		2.15161	576421	.	.	308072	221015		1.3939	332751	.	.	180731
HG002	25	INDEL	ONT	0.667564	0.816907	0.734723	deepvariant	ALL	*	GQ	*	0.297924	9642	43369	2809091522	2546949881	0	525466	.	.	296594	194071		1.52828	350782	.	.	191696	145616		1.31645	174684	.	.	104898	48455		2.16485	611528	.	.	326837	234261		1.39518	350730	.	.	192110
HG002	25	INDEL	ONT	0.667564	0.816907	0.734723	deepvariant	PASS	*	GQ	*	0.297924	9642	43369	2809091522	2546949881	0	525466	.	.	296594	194071		1.52828	350782	.	.	191696	145616		1.31645	174684	.	.	104898	48455		2.16485	611528	.	.	326837	234261		1.39518	350730	.	.	192110
HG002	30	INDEL	ONT	0.693855	0.815435	0.749748	deepvariant	ALL	*	GQ	*	0.300352	9531	44081	2809091522	2546949881	0	525466	.	.	296594	194071		1.52828	364597	.	.	200734	149709		1.34083	160869	.	.	95860	44362		2.16086	638983	.	.	340763	245814		1.38626	364551	.	.	201200
HG002	30	INDEL	ONT	0.693855	0.815435	0.749748	deepvariant	PASS	*	GQ	*	0.300352	9531	44081	2809091522	2546949881	0	525466	.	.	296594	194071		1.52828	364597	.	.	200734	149709		1.34083	160869	.	.	95860	44362		2.16086	638983	.	.	340763	245814		1.38626	364551	.	.	201200
HG00733	5	INDEL	ONT	0.17809	0.747544	0.287651	deepvariant	ALL	*	GQ	*	0.264932	13362	11132	3031399176	2546864659	0	524545	.	.	315538	208857		1.51078	93416	.	.	25162	68254		0.368652	431129	.	.	290376	140603		2.06522	169255	.	.	42105	123480		0.340986	93005	.	.	24319
HG00733	5	INDEL	ONT	0.17809	0.747544	0.287651	deepvariant	PASS	*	GQ	*	0.264932	13362	11132	3031399176	2546864659	0	524545	.	.	315538	208857		1.51078	93416	.	.	25162	68254		0.368652	431129	.	.	290376	140603		2.06522	169255	.	.	42105	123480		0.340986	93005	.	.	24319
HG00733	8	INDEL	ONT	0.335183	0.781415	0.469134	deepvariant	ALL	*	GQ	*	0.270001	12479	23199	3031399176	2546864659	0	524644	.	.	315538	208857		1.51078	175852	.	.	76784	99068		0.775064	348792	.	.	238754	109789		2.17466	306103	.	.	128249	165035		0.777102	174611	.	.	74176
HG00733	8	INDEL	ONT	0.335183	0.781415	0.469134	deepvariant	PASS	*	GQ	*	0.270001	12479	23199	3031399176	2546864659	0	524644	.	.	315538	208857		1.51078	175852	.	.	76784	99068		0.775064	348792	.	.	238754	109789		2.17466	306103	.	.	128249	165035		0.777102	174611	.	.	74176
HG00733	10	INDEL	ONT	0.416319	0.786561	0.54446	deepvariant	ALL	*	GQ	*	0.273784	11439	30424	3031399176	2546864659	0	524670	.	.	315538	208857		1.51078	218430	.	.	108220	110210		0.981944	306240	.	.	207318	98647		2.10161	379116	.	.	180712	178643		1.01158	216556	.	.	104301
HG00733	10	INDEL	ONT	0.416319	0.786561	0.54446	deepvariant	PASS	*	GQ	*	0.273784	11439	30424	3031399176	2546864659	0	524670	.	.	315538	208857		1.51078	218430	.	.	108220	110210		0.981944	306240	.	.	207318	98647		2.10161	379116	.	.	180712	178643		1.01158	216556	.	.	104301
HG00733	12	INDEL	ONT	0.472372	0.787643	0.590565	deepvariant	ALL	*	GQ	*	0.272361	10916	35509	3031399176	2546864659	0	524686	.	.	315538	208857		1.51078	247847	.	.	130072	117775		1.10441	276839	.	.	185466	91082		2.03625	428153	.	.	215875	186616		1.15679	245383	.	.	124936
HG00733	12	INDEL	ONT	0.472372	0.787643	0.590565	deepvariant	PASS	*	GQ	*	0.272361	10916	35509	3031399176	2546864659	0	524686	.	.	315538	208857		1.51078	247847	.	.	130072	117775		1.10441	276839	.	.	185466	91082		2.03625	428153	.	.	215875	186616		1.15679	245383	.	.	124936
HG00733	15	INDEL	ONT	0.53149	0.785268	0.633924	deepvariant	ALL	*	GQ	*	0.283801	11217	40644	3031399176	2546864659	0	524719	.	.	315538	208857		1.51078	278883	.	.	152299	126584		1.20315	245836	.	.	163239	82273		1.98411	490375	.	.	256401	201905		1.26991	275791	.	.	145885
HG00733	15	INDEL	ONT	0.53149	0.785268	0.633924	deepvariant	PASS	*	GQ	*	0.283801	11217	40644	3031399176	2546864659	0	524719	.	.	315538	208857		1.51078	278883	.	.	152299	126584		1.20315	245836	.	.	163239	82273		1.98411	490375	.	.	256401	201905		1.26991	275791	.	.	145885
HG00733	17	INDEL	ONT	0.557432	0.785645	0.65215	deepvariant	ALL	*	GQ	*	0.28673	11202	42620	3031399176	2546864659	0	524713	.	.	315538	208857		1.51078	292492	.	.	161838	130654		1.23868	232221	.	.	153700	78203		1.9654	515778	.	.	272658	208304		1.30894	289030	.	.	154661
HG00733	17	INDEL	ONT	0.557432	0.785645	0.65215	deepvariant	PASS	*	GQ	*	0.28673	11202	42620	3031399176	2546864659	0	524713	.	.	315538	208857		1.51078	292492	.	.	161838	130654		1.23868	232221	.	.	153700	78203		1.9654	515778	.	.	272658	208304		1.30894	289030	.	.	154661
HG00733	20	INDEL	ONT	0.588871	0.787454	0.673836	deepvariant	ALL	*	GQ	*	0.287416	11663	43923	3031399176	2546864659	0	524735	.	.	315538	208857		1.51078	309001	.	.	173060	135941		1.27305	215734	.	.	142478	72916		1.954	543944	.	.	290114	216809		1.33811	305222	.	.	165260
HG00733	20	INDEL	ONT	0.588871	0.787454	0.673836	deepvariant	PASS	*	GQ	*	0.287416	11663	43923	3031399176	2546864659	0	524735	.	.	315538	208857		1.51078	309001	.	.	173060	135941		1.27305	215734	.	.	142478	72916		1.954	543944	.	.	290114	216809		1.33811	305222	.	.	165260
HG00733	25	INDEL	ONT	0.62482	0.793487	0.699124	deepvariant	ALL	*	GQ	*	0.289428	11727	44094	3031399176	2546864659	0	524740	.	.	315538	208857		1.51078	327868	.	.	185464	142404		1.30238	196872	.	.	130074	66453		1.95738	574087	.	.	308447	227595		1.35525	323687	.	.	176811
HG00733	25	INDEL	ONT	0.62482	0.793487	0.699124	deepvariant	PASS	*	GQ	*	0.289428	11727	44094	3031399176	2546864659	0	524740	.	.	315538	208857		1.51078	327868	.	.	185464	142404		1.30238	196872	.	.	130074	66453		1.95738	574087	.	.	308447	227595		1.35525	323687	.	.	176811
HG00733	30	INDEL	ONT	0.65046	0.79698	0.716304	deepvariant	ALL	*	GQ	*	0.290753	11933	44114	3031399176	2546864659	0	524753	.	.	315538	208857		1.51078	341331	.	.	194055	147276		1.31763	183422	.	.	121483	61581		1.97274	596127	.	.	320925	235987		1.35993	336964	.	.	185016
HG00733	30	INDEL	ONT	0.65046	0.79698	0.716304	deepvariant	PASS	*	GQ	*	0.290753	11933	44114	3031399176	2546864659	0	524753	.	.	315538	208857		1.51078	341331	.	.	194055	147276		1.31763	183422	.	.	121483	61581		1.97274	596127	.	.	320925	235987		1.35993	336964	.	.	185016
HG002	5	INDEL	UL-ONT	0.188338	0.782198	0.303579	deepvariant	ALL	*	GQ	*	0.253762	12406	11860	2809091522	2546949881	0	525466	.	.	296594	194071		1.52828	98965	.	.	28408	69133		0.410918	426501	.	.	268186	124938		2.14655	169474	.	.	46785	118670		0.394245	98923	.	.	28416
HG002	5	INDEL	UL-ONT	0.188338	0.782198	0.303579	deepvariant	PASS	*	GQ	*	0.253762	12406	11860	2809091522	2546949881	0	525466	.	.	296594	194071		1.52828	98965	.	.	28408	69133		0.410918	426501	.	.	268186	124938		2.14655	169474	.	.	46785	118670		0.394245	98923	.	.	28416
HG002	8	INDEL	UL-ONT	0.35686	0.830521	0.499216	deepvariant	ALL	*	GQ	*	0.264037	10317	21657	2809091522	2546949881	0	525466	.	.	296594	194071		1.52828	187518	.	.	83174	99803		0.833382	337948	.	.	213420	94268		2.26397	306677	.	.	136952	155810		0.878968	187451	.	.	83250
HG002	8	INDEL	UL-ONT	0.35686	0.830521	0.499216	deepvariant	PASS	*	GQ	*	0.264037	10317	21657	2809091522	2546949881	0	525466	.	.	296594	194071		1.52828	187518	.	.	83174	99803		0.833382	337948	.	.	213420	94268		2.26397	306677	.	.	136952	155810		0.878968	187451	.	.	83250
HG002	10	INDEL	UL-ONT	0.442204	0.839864	0.579362	deepvariant	ALL	*	GQ	*	0.271508	8949	26899	2809091522	2546949881	0	525466	.	.	296594	194071		1.52828	232363	.	.	114183	111524		1.02384	293103	.	.	182411	82547		2.20978	379657	.	.	190378	167874		1.13405	232287	.	.	114331
HG002	10	INDEL	UL-ONT	0.442204	0.839864	0.579362	deepvariant	PASS	*	GQ	*	0.271508	8949	26899	2809091522	2546949881	0	525466	.	.	296594	194071		1.52828	232363	.	.	114183	111524		1.02384	293103	.	.	182411	82547		2.20978	379657	.	.	190378	167874		1.13405	232287	.	.	114331
HG002	12	INDEL	UL-ONT	0.501465	0.843635	0.629029	deepvariant	ALL	*	GQ	*	0.27707	8593	30557	2809091522	2546949881	0	525466	.	.	296594	194071		1.52828	263503	.	.	135417	119586		1.13238	261963	.	.	161177	74485		2.16389	431931	.	.	226392	177853		1.27292	263430	.	.	135626
HG002	12	INDEL	UL-ONT	0.501465	0.843635	0.629029	deepvariant	PASS	*	GQ	*	0.27707	8593	30557	2809091522	2546949881	0	525466	.	.	296594	194071		1.52828	263503	.	.	135417	119586		1.13238	261963	.	.	161177	74485		2.16389	431931	.	.	226392	177853		1.27292	263430	.	.	135626
HG002	15	INDEL	UL-ONT	0.561936	0.845758	0.675234	deepvariant	ALL	*	GQ	*	0.282934	8719	33630	2809091522	2546949881	0	525466	.	.	296594	194071		1.52828	295278	.	.	156512	128246		1.2204	230188	.	.	140082	65825		2.1281	486782	.	.	262387	189822		1.38228	295216	.	.	156781
HG002	15	INDEL	UL-ONT	0.561936	0.845758	0.675234	deepvariant	PASS	*	GQ	*	0.282934	8719	33630	2809091522	2546949881	0	525466	.	.	296594	194071		1.52828	295278	.	.	156512	128246		1.2204	230188	.	.	140082	65825		2.1281	486782	.	.	262387	189822		1.38228	295216	.	.	156781
HG002	17	INDEL	UL-ONT	0.590472	0.847685	0.696077	deepvariant	ALL	*	GQ	*	0.284527	8933	34697	2809091522	2546949881	0	525466	.	.	296594	194071		1.52828	310273	.	.	166203	132526		1.25412	215193	.	.	130391	61545		2.11863	511463	.	.	278036	196102		1.41781	310200	.	.	166519
HG002	17	INDEL	UL-ONT	0.590472	0.847685	0.696077	deepvariant	PASS	*	GQ	*	0.284527	8933	34697	2809091522	2546949881	0	525466	.	.	296594	194071		1.52828	310273	.	.	166203	132526		1.25412	215193	.	.	130391	61545		2.11863	511463	.	.	278036	196102		1.41781	310200	.	.	166519
HG002	20	INDEL	UL-ONT	0.622834	0.852093	0.719646	deepvariant	ALL	*	GQ	*	0.285955	8918	35157	2809091522	2546949881	0	525466	.	.	296594	194071		1.52828	327278	.	.	176820	137777		1.28338	198188	.	.	119774	56294		2.12765	537788	.	.	293985	204134		1.44016	327208	.	.	177161
HG002	20	INDEL	UL-ONT	0.622834	0.852093	0.719646	deepvariant	PASS	*	GQ	*	0.285955	8918	35157	2809091522	2546949881	0	525466	.	.	296594	194071		1.52828	327278	.	.	176820	137777		1.28338	198188	.	.	119774	56294		2.12765	537788	.	.	293985	204134		1.44016	327208	.	.	177161
HG002	25	INDEL	UL-ONT	0.66128	0.859611	0.747514	deepvariant	ALL	*	GQ	*	0.286963	8999	34571	2809091522	2546949881	0	525466	.	.	296594	194071		1.52828	347480	.	.	189148	144286		1.31092	177986	.	.	107446	49785		2.1582	566808	.	.	311739	213847		1.45777	347416	.	.	189557
HG002	25	INDEL	UL-ONT	0.66128	0.859611	0.747514	deepvariant	PASS	*	GQ	*	0.286963	8999	34571	2809091522	2546949881	0	525466	.	.	296594	194071		1.52828	347480	.	.	189148	144286		1.31092	177986	.	.	107446	49785		2.1582	566808	.	.	311739	213847		1.45777	347416	.	.	189557
HG002	30	INDEL	UL-ONT	0.69316	0.871744	0.772262	deepvariant	ALL	*	GQ	*	0.28702	8583	32747	2809091522	2546949881	0	525466	.	.	296594	194071		1.52828	364232	.	.	198557	150419		1.32003	161234	.	.	98037	43652		2.24588	585931	.	.	321893	223002		1.44345	364177	.	.	199037
HG002	30	INDEL	UL-ONT	0.69316	0.871744	0.772262	deepvariant	PASS	*	GQ	*	0.28702	8583	32747	2809091522	2546949881	0	525466	.	.	296594	194071		1.52828	364232	.	.	198557	150419		1.32003	161234	.	.	98037	43652		2.24588	585931	.	.	321893	223002		1.44345	364177	.	.	199037
HG00733	5	INDEL	UL-ONT	0.194814	0.748947	0.3092	deepvariant	ALL	*	GQ	*	0.265539	13847	12270	3031399176	2546864659	0	524535	.	.	315538	208857		1.51078	102187	.	.	31595	70592		0.447572	422348	.	.	283943	138265		2.05361	184854	.	.	52806	127268		0.41492	101683	.	.	30552
HG00733	5	INDEL	UL-ONT	0.194814	0.748947	0.3092	deepvariant	PASS	*	GQ	*	0.265539	13847	12270	3031399176	2546864659	0	524535	.	.	315538	208857		1.51078	102187	.	.	31595	70592		0.447572	422348	.	.	283943	138265		2.05361	184854	.	.	52806	127268		0.41492	101683	.	.	30552
HG00733	8	INDEL	UL-ONT	0.359846	0.777323	0.491953	deepvariant	ALL	*	GQ	*	0.27097	12433	25486	3031399176	2546864659	0	524641	.	.	315538	208857		1.51078	188790	.	.	87983	100807		0.872787	335851	.	.	227555	108050		2.10602	330446	.	.	148423	166172		0.893189	187261	.	.	84786
HG00733	8	INDEL	UL-ONT	0.359846	0.777323	0.491953	deepvariant	PASS	*	GQ	*	0.27097	12433	25486	3031399176	2546864659	0	524641	.	.	315538	208857		1.51078	188790	.	.	87983	100807		0.872787	335851	.	.	227555	108050		2.10602	330446	.	.	148423	166172		0.893189	187261	.	.	84786
HG00733	10	INDEL	UL-ONT	0.43625	0.776721	0.558701	deepvariant	ALL	*	GQ	*	0.274956	11416	32802	3031399176	2546864659	0	524663	.	.	315538	208857		1.51078	228884	.	.	117668	111216		1.05801	295779	.	.	197870	97641		2.02651	402719	.	.	200093	179596		1.11413	226794	.	.	113273
HG00733	10	INDEL	UL-ONT	0.43625	0.776721	0.558701	deepvariant	PASS	*	GQ	*	0.274956	11416	32802	3031399176	2546864659	0	524663	.	.	315538	208857		1.51078	228884	.	.	117668	111216		1.05801	295779	.	.	197870	97641		2.02651	402719	.	.	200093	179596		1.11413	226794	.	.	113273
HG00733	12	INDEL	UL-ONT	0.489645	0.772486	0.599374	deepvariant	ALL	*	GQ	*	0.278195	11241	38361	3031399176	2546864659	0	524680	.	.	315538	208857		1.51078	256907	.	.	138679	118228		1.17298	267773	.	.	176859	90629		1.95146	455899	.	.	236823	189834		1.24753	254202	.	.	133040
HG00733	12	INDEL	UL-ONT	0.489645	0.772486	0.599374	deepvariant	PASS	*	GQ	*	0.278195	11241	38361	3031399176	2546864659	0	524680	.	.	315538	208857		1.51078	256907	.	.	138679	118228		1.17298	267773	.	.	176859	90629		1.95146	455899	.	.	236823	189834		1.24753	254202	.	.	133040
HG00733	15	INDEL	UL-ONT	0.542154	0.764005	0.634239	deepvariant	ALL	*	GQ	*	0.282543	11665	44214	3031399176	2546864659	0	524707	.	.	315538	208857		1.51078	284472	.	.	158955	125517		1.2664	240235	.	.	156583	83340		1.87885	512881	.	.	273886	202865		1.35009	281131	.	.	152022
HG00733	15	INDEL	UL-ONT	0.542154	0.764005	0.634239	deepvariant	PASS	*	GQ	*	0.282543	11665	44214	3031399176	2546864659	0	524707	.	.	315538	208857		1.51078	284472	.	.	158955	125517		1.2664	240235	.	.	156583	83340		1.87885	512881	.	.	273886	202865		1.35009	281131	.	.	152022
HG00733	17	INDEL	UL-ONT	0.566256	0.759984	0.648971	deepvariant	ALL	*	GQ	*	0.284494	12101	46893	3031399176	2546864659	0	524722	.	.	315538	208857		1.51078	297127	.	.	167801	129326		1.2975	227595	.	.	147737	79531		1.8576	539821	.	.	290716	210145		1.38341	293540	.	.	160356
HG00733	17	INDEL	UL-ONT	0.566256	0.759984	0.648971	deepvariant	PASS	*	GQ	*	0.284494	12101	46893	3031399176	2546864659	0	524722	.	.	315538	208857		1.51078	297127	.	.	167801	129326		1.2975	227595	.	.	147737	79531		1.8576	539821	.	.	290716	210145		1.38341	293540	.	.	160356
HG00733	20	INDEL	UL-ONT	0.593152	0.758947	0.665884	deepvariant	ALL	*	GQ	*	0.285218	12302	48296	3031399176	2546864659	0	524729	.	.	315538	208857		1.51078	311244	.	.	177704	133540		1.33072	213485	.	.	137834	75317		1.83005	566429	.	.	306495	218744		1.40116	307277	.	.	169480
HG00733	20	INDEL	UL-ONT	0.593152	0.758947	0.665884	deepvariant	PASS	*	GQ	*	0.285218	12302	48296	3031399176	2546864659	0	524729	.	.	315538	208857		1.51078	311244	.	.	177704	133540		1.33072	213485	.	.	137834	75317		1.83005	566429	.	.	306495	218744		1.40116	307277	.	.	169480
HG00733	25	INDEL	UL-ONT	0.623992	0.755795	0.683599	deepvariant	ALL	*	GQ	*	0.286937	12643	50273	3031399176	2546864659	0	524734	.	.	315538	208857		1.51078	327430	.	.	188750	138680		1.36105	197304	.	.	126788	70177		1.80669	599620	.	.	324868	231246		1.40486	323153	.	.	179919
HG00733	25	INDEL	UL-ONT	0.623992	0.755795	0.683599	deepvariant	PASS	*	GQ	*	0.286937	12643	50273	3031399176	2546864659	0	524734	.	.	315538	208857		1.51078	327430	.	.	188750	138680		1.36105	197304	.	.	126788	70177		1.80669	599620	.	.	324868	231246		1.40486	323153	.	.	179919
HG00733	30	INDEL	UL-ONT	0.645196	0.751783	0.694423	deepvariant	ALL	*	GQ	*	0.288353	13129	51912	3031399176	2546864659	0	524741	.	.	315538	208857		1.51078	338561	.	.	196493	142068		1.38309	186180	.	.	119045	66789		1.7824	624343	.	.	337767	241005		1.40149	334026	.	.	187117
HG00733	30	INDEL	UL-ONT	0.645196	0.751783	0.694423	deepvariant	PASS	*	GQ	*	0.288353	13129	51912	3031399176	2546864659	0	524741	.	.	315538	208857		1.51078	338561	.	.	196493	142068		1.38309	186180	.	.	119045	66789		1.7824	624343	.	.	337767	241005		1.40149	334026	.	.	187117
[truncated: 17 more columns]
