# Supplementary material for: Whole-genome long-read sequencing downsampling and its effect on variant-calling precision and recall
Source: Genome Res. 2023 Dec;33(12):2029–40. doi: 10.1101/gr.278070.123 (PMC10760522; doi:10.1101/gr.278070.123)
Supplement: Supplement 7 [file Supplemental_Table_S5.xlsx]

## Sheet: S5
S5 - SV (read-based)
SAMPLE	COVERAGE	SVTYPE	TECH	CALLER	RECALL	PRECISION	F1	COUNT_QUERY	COUNT_TRUTH	COUNT_SHARED	TRUTHSET
HG002	5	SV (DEL)	HiFi	cuteSV	0.63351	0.829742	0.718468	1201	3386	5853	HGSVC (Freeze 4)
HG002	5	SV (INS)	HiFi	cuteSV	0.589259	0.858999	0.69901	1367	5805	8328	HGSVC (Freeze 4)
HG002	5	SV (DEL)	HiFi	PBSV	0.460439	0.86905	0.601953	641	4985	4254	HGSVC (Freeze 4)
HG002	5	SV (INS)	HiFi	PBSV	0.415552	0.881303	0.564793	791	8260	5873	HGSVC (Freeze 4)
HG002	5	SV (DEL)	HiFi	Sniffles	0.660569	0.82473	0.733578	1297	3136	6103	HGSVC (Freeze 4)
HG002	5	SV (INS)	HiFi	Sniffles	0.634331	0.847514	0.725588	1613	5168	8965	HGSVC (Freeze 4)
HG002	5	SV (DEL)	HiFi	SVIM	0.433164	0.837414	0.57098	777	5237	4002	HGSVC (Freeze 4)
HG002	5	SV (INS)	HiFi	SVIM	0.3835	0.847272	0.528008	977	8713	5420	HGSVC (Freeze 4)
HG002	5	SV (DEL)	HiFi	Delly	0.438684	0.910582	0.592111	398	5186	4053	HGSVC (Freeze 4)
HG002	5	SV (INS)	HiFi	Delly	0.382297	0.911899	0.538738	522	8730	5403	HGSVC (Freeze 4)
HG002	5	SV (DEL)	ONT	cuteSV	0.632752	0.766086	0.693065	1785	3393	5846	HGSVC (Freeze 4)
HG002	5	SV (INS)	ONT	cuteSV	0.609142	0.789961	0.687867	2289	5524	8609	HGSVC (Freeze 4)
HG002	5	SV (DEL)	ONT	Sniffles	0.64823	0.803138	0.717417	1468	3250	5989	HGSVC (Freeze 4)
HG002	5	SV (INS)	ONT	Sniffles	0.632774	0.817011	0.713186	2003	5190	8943	HGSVC (Freeze 4)
HG002	5	SV (DEL)	ONT	SVIM	0.443338	0.82915	0.577756	844	5143	4096	HGSVC (Freeze 4)
HG002	5	SV (INS)	ONT	SVIM	0.42001	0.788837	0.548158	1589	8197	5936	HGSVC (Freeze 4)
HG002	5	SV (DEL)	ONT	Delly	0.460331	0.893112	0.607528	509	4986	4253	HGSVC (Freeze 4)
HG002	5	SV (INS)	ONT	Delly	0.415694	0.904821	0.569669	618	8258	5875	HGSVC (Freeze 4)
HG002	5	SV (DEL)	UL-ONT	cuteSV	0.64336	0.728342	0.683218	2217	3295	5944	HGSVC (Freeze 4)
HG002	5	SV (INS)	UL-ONT	cuteSV	0.610628	0.756686	0.675856	2775	5503	8630	HGSVC (Freeze 4)
HG002	5	SV (DEL)	UL-ONT	Sniffles	0.654833	0.789096	0.715722	1617	3189	6050	HGSVC (Freeze 4)
HG002	5	SV (INS)	UL-ONT	Sniffles	0.639284	0.786884	0.705446	2447	5098	9035	HGSVC (Freeze 4)
HG002	5	SV (DEL)	UL-ONT	SVIM	0.450373	0.813649	0.579809	953	5078	4161	HGSVC (Freeze 4)
HG002	5	SV (INS)	UL-ONT	SVIM	0.42751	0.757618	0.546589	1933	8091	6042	HGSVC (Freeze 4)
HG002	5	SV (DEL)	UL-ONT	Delly	0.458275	0.896464	0.606503	489	5005	4234	HGSVC (Freeze 4)
HG002	5	SV (INS)	UL-ONT	Delly	0.426236	0.903148	0.579147	646	8109	6024	HGSVC (Freeze 4)
HG002	8	SV (DEL)	HiFi	cuteSV	0.661868	0.831633	0.737102	1238	3124	6115	HGSVC (Freeze 4)
HG002	8	SV (INS)	HiFi	cuteSV	0.611901	0.865752	0.717022	1341	5485	8648	HGSVC (Freeze 4)
HG002	8	SV (DEL)	HiFi	PBSV	0.654941	0.850576	0.740048	1063	3188	6051	HGSVC (Freeze 4)
HG002	8	SV (INS)	HiFi	PBSV	0.600368	0.868564	0.709982	1284	5648	8485	HGSVC (Freeze 4)
HG002	8	SV (DEL)	HiFi	Sniffles	0.774651	0.823117	0.798149	1538	2082	7157	HGSVC (Freeze 4)
HG002	8	SV (INS)	HiFi	Sniffles	0.7549	0.841404	0.795808	2011	3464	10669	HGSVC (Freeze 4)
HG002	8	SV (DEL)	HiFi	SVIM	0.67464	0.824362	0.742024	1328	3006	6233	HGSVC (Freeze 4)
HG002	8	SV (INS)	HiFi	SVIM	0.628883	0.833302	0.716803	1778	5245	8888	HGSVC (Freeze 4)
HG002	8	SV (DEL)	HiFi	Delly	0.629072	0.898022	0.739864	660	3427	5812	HGSVC (Freeze 4)
HG002	8	SV (INS)	HiFi	Delly	0.561169	0.906504	0.693209	818	6202	7931	HGSVC (Freeze 4)
HG002	8	SV (DEL)	ONT	cuteSV	0.667605	0.775849	0.717668	1782	3071	6168	HGSVC (Freeze 4)
HG002	8	SV (INS)	ONT	cuteSV	0.634189	0.817419	0.71424	2002	5170	8963	HGSVC (Freeze 4)
HG002	8	SV (DEL)	ONT	Sniffles	0.753545	0.792217	0.772397	1826	2277	6962	HGSVC (Freeze 4)
HG002	8	SV (INS)	ONT	Sniffles	0.726314	0.81352	0.767448	2353	3868	10265	HGSVC (Freeze 4)
HG002	8	SV (DEL)	ONT	SVIM	0.677779	0.806024	0.736359	1507	2977	6262	HGSVC (Freeze 4)
HG002	8	SV (INS)	ONT	SVIM	0.648765	0.752544	0.696812	3015	4964	9169	HGSVC (Freeze 4)
HG002	8	SV (DEL)	ONT	Delly	0.643576	0.875184	0.74172	848	3293	5946	HGSVC (Freeze 4)
HG002	8	SV (INS)	ONT	Delly	0.591877	0.891981	0.711582	1013	5768	8365	HGSVC (Freeze 4)
HG002	8	SV (DEL)	UL-ONT	cuteSV	0.669661	0.756727	0.710537	1989	3052	6187	HGSVC (Freeze 4)
HG002	8	SV (INS)	UL-ONT	cuteSV	0.63334	0.790655	0.703308	2370	5182	8951	HGSVC (Freeze 4)
HG002	8	SV (DEL)	UL-ONT	Sniffles	0.754952	0.787513	0.770889	1882	2264	6975	HGSVC (Freeze 4)
HG002	8	SV (INS)	UL-ONT	Sniffles	0.733602	0.783673	0.757812	2862	3765	10368	HGSVC (Freeze 4)
HG002	8	SV (DEL)	UL-ONT	SVIM	0.685139	0.794428	0.735747	1638	2909	6330	HGSVC (Freeze 4)
HG002	8	SV (INS)	UL-ONT	SVIM	0.650463	0.724315	0.685405	3499	4940	9193	HGSVC (Freeze 4)
HG002	8	SV (DEL)	UL-ONT	Delly	0.645741	0.870314	0.741394	889	3273	5966	HGSVC (Freeze 4)
HG002	8	SV (INS)	UL-ONT	Delly	0.602986	0.885679	0.717491	1100	5611	8522	HGSVC (Freeze 4)
HG002	10	SV (DEL)	HiFi	cuteSV	0.721723	0.833813	0.773729	1329	2571	6668	HGSVC (Freeze 4)
HG002	10	SV (INS)	HiFi	cuteSV	0.672044	0.867001	0.757175	1457	4635	9498	HGSVC (Freeze 4)
HG002	10	SV (DEL)	HiFi	PBSV	0.714038	0.849363	0.775844	1170	2642	6597	HGSVC (Freeze 4)
HG002	10	SV (INS)	HiFi	PBSV	0.672327	0.866259	0.757071	1467	4631	9502	HGSVC (Freeze 4)
HG002	10	SV (DEL)	HiFi	Sniffles	0.807771	0.814382	0.811063	1701	1776	7463	HGSVC (Freeze 4)
HG002	10	SV (INS)	HiFi	Sniffles	0.791764	0.840532	0.815419	2123	2943	11190	HGSVC (Freeze 4)
HG002	10	SV (DEL)	HiFi	SVIM	0.75322	0.818899	0.784687	1539	2280	6959	HGSVC (Freeze 4)
HG002	10	SV (INS)	HiFi	SVIM	0.722635	0.826094	0.770909	2150	3920	10213	HGSVC (Freeze 4)
HG002	10	SV (DEL)	HiFi	Delly	0.690118	0.890254	0.777514	786	2863	6376	HGSVC (Freeze 4)
HG002	10	SV (INS)	HiFi	Delly	0.630156	0.902788	0.742229	959	5227	8906	HGSVC (Freeze 4)
HG002	10	SV (DEL)	ONT	cuteSV	0.731248	0.770353	0.750292	2014	2483	6756	HGSVC (Freeze 4)
HG002	10	SV (INS)	ONT	cuteSV	0.693271	0.807949	0.74623	2329	4335	9798	HGSVC (Freeze 4)
HG002	10	SV (DEL)	ONT	Sniffles	0.788181	0.78989	0.789035	1937	1957	7282	HGSVC (Freeze 4)
HG002	10	SV (INS)	ONT	Sniffles	0.752706	0.816361	0.783243	2393	3495	10638	HGSVC (Freeze 4)
HG002	10	SV (DEL)	ONT	SVIM	0.765776	0.78795	0.776704	1904	2164	7075	HGSVC (Freeze 4)
HG002	10	SV (INS)	ONT	SVIM	0.731692	0.722086	0.726857	3980	3792	10341	HGSVC (Freeze 4)
HG002	10	SV (DEL)	ONT	Delly	0.713714	0.863541	0.781511	1042	2645	6594	HGSVC (Freeze 4)
HG002	10	SV (INS)	ONT	Delly	0.655275	0.879821	0.751125	1265	4872	9261	HGSVC (Freeze 4)
HG002	10	SV (DEL)	UL-ONT	cuteSV	0.730274	0.746019	0.738063	2297	2492	6747	HGSVC (Freeze 4)
HG002	10	SV (INS)	UL-ONT	cuteSV	0.68945	0.786187	0.734648	2650	4389	9744	HGSVC (Freeze 4)
HG002	10	SV (DEL)	UL-ONT	Sniffles	0.784717	0.783276	0.783996	2006	1989	7250	HGSVC (Freeze 4)
HG002	10	SV (INS)	UL-ONT	Sniffles	0.752423	0.785145	0.768436	2910	3499	10634	HGSVC (Freeze 4)
HG002	10	SV (DEL)	UL-ONT	SVIM	0.765992	0.778377	0.772135	2015	2162	7077	HGSVC (Freeze 4)
HG002	10	SV (INS)	UL-ONT	SVIM	0.735654	0.698301	0.716491	4492	3736	10397	HGSVC (Freeze 4)
HG002	10	SV (DEL)	UL-ONT	Delly	0.71209	0.862593	0.780149	1048	2660	6579	HGSVC (Freeze 4)
HG002	10	SV (INS)	UL-ONT	Delly	0.665181	0.872645	0.754918	1372	4732	9401	HGSVC (Freeze 4)
HG002	12	SV (DEL)	HiFi	cuteSV	0.715337	0.839025	0.77226	1268	2630	6609	HGSVC (Freeze 4)
HG002	12	SV (INS)	HiFi	cuteSV	0.657751	0.864986	0.747267	1451	4837	9296	HGSVC (Freeze 4)
HG002	12	SV (DEL)	HiFi	PBSV	0.759931	0.839933	0.797932	1338	2218	7021	HGSVC (Freeze 4)
HG002	12	SV (INS)	HiFi	PBSV	0.717399	0.858946	0.781817	1665	3994	10139	HGSVC (Freeze 4)
HG002	12	SV (DEL)	HiFi	Sniffles	0.826929	0.815368	0.821108	1730	1599	7640	HGSVC (Freeze 4)
HG002	12	SV (INS)	HiFi	Sniffles	0.806552	0.839705	0.822795	2176	2734	11399	HGSVC (Freeze 4)
HG002	12	SV (DEL)	HiFi	SVIM	0.744994	0.836635	0.78816	1344	2356	6883	HGSVC (Freeze 4)
HG002	12	SV (INS)	HiFi	SVIM	0.70912	0.843674	0.770567	1857	4111	10022	HGSVC (Freeze 4)
HG002	12	SV (DEL)	HiFi	Delly	0.73785	0.886707	0.805459	871	2422	6817	HGSVC (Freeze 4)
HG002	12	SV (INS)	HiFi	Delly	0.676007	0.899708	0.771978	1065	4579	9554	HGSVC (Freeze 4)
HG002	12	SV (DEL)	ONT	cuteSV	0.728109	0.772774	0.749777	1978	2512	6727	HGSVC (Freeze 4)
HG002	12	SV (INS)	ONT	cuteSV	0.682799	0.824293	0.746904	2057	4483	9650	HGSVC (Freeze 4)
HG002	12	SV (DEL)	ONT	Sniffles	0.800411	0.786786	0.79354	2004	1844	7395	HGSVC (Freeze 4)
HG002	12	SV (INS)	ONT	Sniffles	0.766221	0.819696	0.792057	2382	3304	10829	HGSVC (Freeze 4)
HG002	12	SV (DEL)	ONT	SVIM	0.747051	0.813531	0.778875	1582	2337	6902	HGSVC (Freeze 4)
HG002	12	SV (INS)	ONT	SVIM	0.705653	0.762753	0.733093	3102	4160	9973	HGSVC (Freeze 4)
HG002	12	SV (DEL)	ONT	Delly	0.756575	0.858301	0.804234	1154	2249	6990	HGSVC (Freeze 4)
HG002	12	SV (INS)	ONT	Delly	0.699002	0.876964	0.777935	1386	4254	9879	HGSVC (Freeze 4)
HG002	12	SV (DEL)	UL-ONT	cuteSV	0.735036	0.757248	0.745977	2177	2448	6791	HGSVC (Freeze 4)
HG002	12	SV (INS)	UL-ONT	cuteSV	0.685559	0.797777	0.737423	2456	4444	9689	HGSVC (Freeze 4)
HG002	12	SV (DEL)	UL-ONT	Sniffles	0.801277	0.780496	0.79075	2082	1836	7403	HGSVC (Freeze 4)
HG002	12	SV (INS)	UL-ONT	Sniffles	0.761268	0.788263	0.77453	2890	3374	10759	HGSVC (Freeze 4)
HG002	12	SV (DEL)	UL-ONT	SVIM	0.749432	0.808501	0.777846	1640	2315	6924	HGSVC (Freeze 4)
HG002	12	SV (INS)	UL-ONT	SVIM	0.708201	0.735956	0.721812	3591	4124	10009	HGSVC (Freeze 4)
HG002	12	SV (DEL)	UL-ONT	Delly	0.756142	0.8532	0.801744	1202	2253	6986	HGSVC (Freeze 4)
HG002	12	SV (INS)	UL-ONT	Delly	0.70155	0.862849	0.773884	1576	4218	9915	HGSVC (Freeze 4)
HG002	15	SV (DEL)	HiFi	cuteSV	0.766425	0.831884	0.797814	1431	2158	7081	HGSVC (Freeze 4)
HG002	15	SV (INS)	HiFi	cuteSV	0.712517	0.866982	0.782197	1545	4063	10070	HGSVC (Freeze 4)
HG002	15	SV (DEL)	HiFi	PBSV	0.789696	0.831074	0.809857	1483	1943	7296	HGSVC (Freeze 4)
HG002	15	SV (INS)	HiFi	PBSV	0.759216	0.850777	0.802393	1882	3403	10730	HGSVC (Freeze 4)
HG002	15	SV (DEL)	HiFi	Sniffles	0.844355	0.815407	0.829629	1766	1438	7801	HGSVC (Freeze 4)
HG002	15	SV (INS)	HiFi	Sniffles	0.826718	0.841241	0.833916	2205	2449	11684	HGSVC (Freeze 4)
HG002	15	SV (DEL)	HiFi	SVIM	0.809178	0.826077	0.817541	1574	1763	7476	HGSVC (Freeze 4)
HG002	15	SV (INS)	HiFi	SVIM	0.78108	0.827511	0.803625	2301	3094	11039	HGSVC (Freeze 4)
HG002	15	SV (DEL)	HiFi	Delly	0.769456	0.875816	0.819198	1008	2130	7109	HGSVC (Freeze 4)
HG002	15	SV (INS)	HiFi	Delly	0.716125	0.888041	0.792871	1276	4012	10121	HGSVC (Freeze 4)
HG002	15	SV (DEL)	ONT	cuteSV	0.77779	0.766507	0.772107	2189	2053	7186	HGSVC (Freeze 4)
HG002	15	SV (INS)	ONT	cuteSV	0.73056	0.818275	0.771934	2293	3808	10325	HGSVC (Freeze 4)
HG002	15	SV (DEL)	ONT	Sniffles	0.810694	0.789751	0.800085	1994	1749	7490	HGSVC (Freeze 4)
HG002	15	SV (INS)	ONT	Sniffles	0.772306	0.827019	0.798727	2283	3218	10915	HGSVC (Freeze 4)
HG002	15	SV (DEL)	ONT	SVIM	0.802576	0.795345	0.798944	1908	1824	7415	HGSVC (Freeze 4)
HG002	15	SV (INS)	ONT	SVIM	0.766575	0.733812	0.749836	3930	3299	10834	HGSVC (Freeze 4)
HG002	15	SV (DEL)	ONT	Delly	0.783093	0.844224	0.812511	1335	2004	7235	HGSVC (Freeze 4)
HG002	15	SV (INS)	ONT	Delly	0.725748	0.866154	0.789759	1585	3876	10257	HGSVC (Freeze 4)
HG002	15	SV (DEL)	UL-ONT	cuteSV	0.779846	0.746787	0.762959	2443	2034	7205	HGSVC (Freeze 4)
HG002	15	SV (INS)	UL-ONT	cuteSV	0.730064	0.7915	0.759542	2718	3815	10318	HGSVC (Freeze 4)
HG002	15	SV (DEL)	UL-ONT	Sniffles	0.813724	0.784432	0.79881	2066	1721	7518	HGSVC (Freeze 4)
HG002	15	SV (INS)	UL-ONT	Sniffles	0.773155	0.788156	0.780584	2937	3206	10927	HGSVC (Freeze 4)
HG002	15	SV (DEL)	UL-ONT	SVIM	0.807555	0.787108	0.797201	2018	1778	7461	HGSVC (Freeze 4)
HG002	15	SV (INS)	UL-ONT	SVIM	0.770254	0.709324	0.738535	4461	3247	10886	HGSVC (Freeze 4)
HG002	15	SV (DEL)	UL-ONT	Delly	0.786232	0.842789	0.813529	1355	1975	7264	HGSVC (Freeze 4)
HG002	15	SV (INS)	UL-ONT	Delly	0.725324	0.848522	0.782101	1830	3882	10251	HGSVC (Freeze 4)
HG002	17	SV (DEL)	HiFi	cuteSV	0.786665	0.835979	0.810573	1426	1971	7268	HGSVC (Freeze 4)
HG002	17	SV (INS)	HiFi	cuteSV	0.730984	0.866259	0.792893	1595	3802	10331	HGSVC (Freeze 4)
HG002	17	SV (DEL)	HiFi	PBSV	0.799545	0.826471	0.812785	1551	1852	7387	HGSVC (Freeze 4)
HG002	17	SV (INS)	HiFi	PBSV	0.767565	0.842105	0.803109	2034	3285	10848	HGSVC (Freeze 4)
HG002	17	SV (DEL)	HiFi	Sniffles	0.850417	0.81445	0.832045	1790	1382	7857	HGSVC (Freeze 4)
HG002	17	SV (INS)	HiFi	Sniffles	0.835704	0.840461	0.838076	2242	2322	11811	HGSVC (Freeze 4)
HG002	17	SV (DEL)	HiFi	SVIM	0.833748	0.82218	0.827923	1666	1536	7703	HGSVC (Freeze 4)
HG002	17	SV (INS)	HiFi	SVIM	0.810161	0.824393	0.817215	2439	2683	11450	HGSVC (Freeze 4)
HG002	17	SV (DEL)	HiFi	Delly	0.782119	0.874183	0.825593	1040	2013	7226	HGSVC (Freeze 4)
HG002	17	SV (INS)	HiFi	Delly	0.731621	0.885122	0.801085	1342	3793	10340	HGSVC (Freeze 4)
HG002	17	SV (DEL)	ONT	cuteSV	0.794242	0.760336	0.776919	2313	1901	7338	HGSVC (Freeze 4)
HG002	17	SV (INS)	ONT	cuteSV	0.746975	0.812139	0.778195	2442	3576	10557	HGSVC (Freeze 4)
HG002	17	SV (DEL)	ONT	Sniffles	0.816972	0.791195	0.803877	1992	1691	7548	HGSVC (Freeze 4)
HG002	17	SV (INS)	ONT	Sniffles	0.778249	0.829925	0.803257	2254	3134	10999	HGSVC (Freeze 4)
HG002	17	SV (DEL)	ONT	SVIM	0.825522	0.79481	0.809875	1969	1612	7627	HGSVC (Freeze 4)
HG002	17	SV (INS)	ONT	SVIM	0.788863	0.722226	0.754075	4288	2984	11149	HGSVC (Freeze 4)
HG002	17	SV (DEL)	ONT	Delly	0.795865	0.83709	0.815957	1431	1886	7353	HGSVC (Freeze 4)
HG002	17	SV (INS)	ONT	Delly	0.733673	0.859072	0.791436	1701	3764	10369	HGSVC (Freeze 4)
HG002	17	SV (DEL)	UL-ONT	cuteSV	0.804091	0.742158	0.771884	2581	1810	7429	HGSVC (Freeze 4)
HG002	17	SV (INS)	UL-ONT	cuteSV	0.742447	0.791686	0.766276	2761	3640	10493	HGSVC (Freeze 4)
HG002	17	SV (DEL)	UL-ONT	Sniffles	0.824765	0.785001	0.804391	2087	1619	7620	HGSVC (Freeze 4)
HG002	17	SV (INS)	UL-ONT	Sniffles	0.776905	0.795076	0.785886	2830	3153	10980	HGSVC (Freeze 4)
HG002	17	SV (DEL)	UL-ONT	SVIM	0.830609	0.780671	0.804867	2156	1565	7674	HGSVC (Freeze 4)
HG002	17	SV (INS)	UL-ONT	SVIM	0.794806	0.697702	0.743095	4867	2900	11233	HGSVC (Freeze 4)
HG002	17	SV (DEL)	UL-ONT	Delly	0.794242	0.834338	0.813796	1457	1901	7338	HGSVC (Freeze 4)
HG002	17	SV (INS)	UL-ONT	Delly	0.737211	0.845561	0.787677	1903	3714	10419	HGSVC (Freeze 4)
HG002	20	SV (DEL)	HiFi	cuteSV	0.804849	0.830281	0.817367	1520	1803	7436	HGSVC (Freeze 4)
HG002	20	SV (INS)	HiFi	cuteSV	0.747895	0.863209	0.801425	1675	3563	10570	HGSVC (Freeze 4)
HG002	20	SV (DEL)	HiFi	PBSV	0.808529	0.825779	0.817063	1576	1769	7470	HGSVC (Freeze 4)
HG002	20	SV (INS)	HiFi	PBSV	0.781575	0.838279	0.808934	2131	3087	11046	HGSVC (Freeze 4)
HG002	20	SV (DEL)	HiFi	Sniffles	0.856586	0.816381	0.836001	1780	1325	7914	HGSVC (Freeze 4)
HG002	20	SV (INS)	HiFi	Sniffles	0.840161	0.840994	0.840578	2245	2259	11874	HGSVC (Freeze 4)
HG002	20	SV (DEL)	HiFi	SVIM	0.853447	0.816591	0.834612	1771	1354	7885	HGSVC (Freeze 4)
HG002	20	SV (INS)	HiFi	SVIM	0.84094	0.814822	0.827675	2701	2248	11885	HGSVC (Freeze 4)
HG002	20	SV (DEL)	HiFi	Delly	0.792185	0.867797	0.828269	1115	1920	7319	HGSVC (Freeze 4)
HG002	20	SV (INS)	HiFi	Delly	0.748249	0.880223	0.808888	1439	3558	10575	HGSVC (Freeze 4)
HG002	20	SV (DEL)	ONT	cuteSV	0.805174	0.755612	0.779606	2406	1800	7439	HGSVC (Freeze 4)
HG002	20	SV (INS)	ONT	cuteSV	0.76148	0.814748	0.787214	2447	3371	10762	HGSVC (Freeze 4)
HG002	20	SV (DEL)	ONT	Sniffles	0.824981	0.791156	0.807715	2012	1617	7622	HGSVC (Freeze 4)
HG002	20	SV (INS)	ONT	Sniffles	0.783344	0.830969	0.806454	2252	3062	11071	HGSVC (Freeze 4)
HG002	20	SV (DEL)	ONT	SVIM	0.83981	0.780741	0.809199	2179	1480	7759	HGSVC (Freeze 4)
HG002	20	SV (INS)	ONT	SVIM	0.811363	0.718079	0.761876	4502	2666	11467	HGSVC (Freeze 4)
HG002	20	SV (DEL)	ONT	Delly	0.804524	0.828559	0.816365	1538	1806	7433	HGSVC (Freeze 4)
HG002	20	SV (INS)	ONT	Delly	0.746692	0.854217	0.796844	1801	3580	10553	HGSVC (Freeze 4)
HG002	20	SV (DEL)	UL-ONT	cuteSV	0.814699	0.731132	0.770656	2768	1712	7527	HGSVC (Freeze 4)
HG002	20	SV (INS)	UL-ONT	cuteSV	0.755607	0.790276	0.772553	2834	3454	10679	HGSVC (Freeze 4)
HG002	20	SV (DEL)	UL-ONT	Sniffles	0.825414	0.785053	0.804727	2088	1613	7626	HGSVC (Freeze 4)
HG002	20	SV (INS)	UL-ONT	Sniffles	0.782	0.799364	0.790586	2774	3081	11052	HGSVC (Freeze 4)
HG002	20	SV (DEL)	UL-ONT	SVIM	0.844464	0.772858	0.807076	2293	1437	7802	HGSVC (Freeze 4)
HG002	20	SV (INS)	UL-ONT	SVIM	0.809948	0.689163	0.74469	5163	2686	11447	HGSVC (Freeze 4)
HG002	20	SV (DEL)	UL-ONT	Delly	0.804091	0.825261	0.814539	1573	1810	7429	HGSVC (Freeze 4)
HG002	20	SV (INS)	UL-ONT	Delly	0.746551	0.838779	0.789982	2028	3582	10551	HGSVC (Freeze 4)
HG002	25	SV (DEL)	HiFi	cuteSV	0.813291	0.831471	0.822281	1523	1725	7514	HGSVC (Freeze 4)
HG002	25	SV (INS)	HiFi	cuteSV	0.755324	0.864163	0.806086	1678	3458	10675	HGSVC (Freeze 4)
HG002	25	SV (DEL)	HiFi	PBSV	0.814374	0.816849	0.81561	1687	1715	7524	HGSVC (Freeze 4)
HG002	25	SV (INS)	HiFi	PBSV	0.787943	0.832785	0.809744	2236	2997	11136	HGSVC (Freeze 4)
HG002	25	SV (DEL)	HiFi	Sniffles	0.863189	0.81594	0.8389	1799	1264	7975	HGSVC (Freeze 4)
HG002	25	SV (INS)	HiFi	Sniffles	0.847803	0.845231	0.846515	2194	2151	11982	HGSVC (Freeze 4)
HG002	25	SV (DEL)	HiFi	SVIM	0.863838	0.820415	0.841567	1747	1258	7981	HGSVC (Freeze 4)
HG002	25	SV (INS)	HiFi	SVIM	0.843487	0.817851	0.830471	2655	2212	11921	HGSVC (Freeze 4)
HG002	25	SV (DEL)	HiFi	Delly	0.80171	0.857391	0.828616	1232	1832	7407	HGSVC (Freeze 4)
HG002	25	SV (INS)	HiFi	Delly	0.757659	0.875624	0.812381	1521	3425	10708	HGSVC (Freeze 4)
HG002	25	SV (DEL)	ONT	cuteSV	0.819894	0.756592	0.786972	2437	1664	7575	HGSVC (Freeze 4)
HG002	25	SV (INS)	ONT	cuteSV	0.768485	0.819018	0.792947	2400	3272	10861	HGSVC (Freeze 4)
HG002	25	SV (DEL)	ONT	Sniffles	0.830068	0.800188	0.814854	1915	1570	7669	HGSVC (Freeze 4)
HG002	25	SV (INS)	ONT	Sniffles	0.783415	0.82868	0.805412	2289	3061	11072	HGSVC (Freeze 4)
HG002	25	SV (DEL)	ONT	SVIM	0.84468	0.792767	0.817901	2040	1435	7804	HGSVC (Freeze 4)
HG002	25	SV (INS)	ONT	SVIM	0.805844	0.733496	0.76797	4138	2744	11389	HGSVC (Freeze 4)
HG002	25	SV (DEL)	ONT	Delly	0.808096	0.814443	0.811257	1701	1773	7466	HGSVC (Freeze 4)
HG002	25	SV (INS)	ONT	Delly	0.750938	0.840567	0.793228	2013	3520	10613	HGSVC (Freeze 4)
HG002	25	SV (DEL)	UL-ONT	cuteSV	0.824332	0.736557	0.777976	2724	1623	7616	HGSVC (Freeze 4)
HG002	25	SV (INS)	UL-ONT	cuteSV	0.763037	0.795456	0.778909	2773	3349	10784	HGSVC (Freeze 4)
HG002	25	SV (DEL)	UL-ONT	Sniffles	0.829094	0.785158	0.806528	2096	1579	7660	HGSVC (Freeze 4)
HG002	25	SV (INS)	UL-ONT	Sniffles	0.782919	0.800825	0.791771	2752	3068	11065	HGSVC (Freeze 4)
HG002	25	SV (DEL)	UL-ONT	SVIM	0.845763	0.780385	0.81176	2199	1425	7814	HGSVC (Freeze 4)
HG002	25	SV (INS)	UL-ONT	SVIM	0.80917	0.707498	0.754926	4728	2697	11436	HGSVC (Freeze 4)
HG002	25	SV (DEL)	UL-ONT	Delly	0.808096	0.81267	0.810377	1721	1773	7466	HGSVC (Freeze 4)
HG002	25	SV (INS)	UL-ONT	Delly	0.752282	0.830755	0.789573	2166	3501	10632	HGSVC (Freeze 4)
HG002	30	SV (DEL)	HiFi	cuteSV	0.817837	0.828872	0.823318	1560	1683	7556	HGSVC (Freeze 4)
HG002	30	SV (INS)	HiFi	cuteSV	0.762966	0.862295	0.809595	1722	3350	10783	HGSVC (Freeze 4)
HG002	30	SV (DEL)	HiFi	PBSV	0.817837	0.811426	0.814619	1756	1683	7556	HGSVC (Freeze 4)
HG002	30	SV (INS)	HiFi	PBSV	0.792755	0.831836	0.811825	2265	2929	11204	HGSVC (Freeze 4)
HG002	30	SV (DEL)	HiFi	Sniffles	0.866436	0.814758	0.839803	1820	1234	8005	HGSVC (Freeze 4)
HG002	30	SV (INS)	HiFi	Sniffles	0.850209	0.848588	0.849397	2144	2117	12016	HGSVC (Freeze 4)
HG002	30	SV (DEL)	HiFi	SVIM	0.870008	0.818951	0.843707	1777	1201	8038	HGSVC (Freeze 4)
HG002	30	SV (INS)	HiFi	SVIM	0.861034	0.814034	0.836875	2780	1964	12169	HGSVC (Freeze 4)
HG002	30	SV (DEL)	HiFi	Delly	0.805607	0.852675	0.828473	1286	1796	7443	HGSVC (Freeze 4)
HG002	30	SV (INS)	HiFi	Delly	0.761409	0.86406	0.809493	1693	3372	10761	HGSVC (Freeze 4)
HG002	30	SV (DEL)	ONT	cuteSV	0.825847	0.747966	0.784979	2571	1609	7630	HGSVC (Freeze 4)
HG002	30	SV (INS)	ONT	cuteSV	0.774924	0.817191	0.795497	2450	3181	10952	HGSVC (Freeze 4)
HG002	30	SV (DEL)	ONT	Sniffles	0.829527	0.796012	0.812424	1964	1575	7664	HGSVC (Freeze 4)
HG002	30	SV (INS)	ONT	Sniffles	0.782212	0.833585	0.807082	2207	3078	11055	HGSVC (Freeze 4)
HG002	30	SV (DEL)	ONT	SVIM	0.849118	0.786861	0.816805	2125	1394	7845	HGSVC (Freeze 4)
HG002	30	SV (INS)	ONT	SVIM	0.81193	0.734541	0.771299	4147	2658	11475	HGSVC (Freeze 4)
HG002	30	SV (DEL)	ONT	Delly	0.812426	0.802437	0.807401	1848	1733	7506	HGSVC (Freeze 4)
HG002	30	SV (INS)	ONT	Delly	0.753343	0.839735	0.794197	2032	3486	10647	HGSVC (Freeze 4)
HG002	30	SV (DEL)	UL-ONT	cuteSV	0.832449	0.73577	0.781129	2762	1548	7691	HGSVC (Freeze 4)
HG002	30	SV (INS)	UL-ONT	cuteSV	0.771881	0.799721	0.785555	2732	3224	10909	HGSVC (Freeze 4)
HG002	30	SV (DEL)	UL-ONT	Sniffles	0.829202	0.794215	0.811332	1985	1578	7661	HGSVC (Freeze 4)
HG002	30	SV (INS)	UL-ONT	Sniffles	0.782495	0.809353	0.795697	2605	3074	11059	HGSVC (Freeze 4)
HG002	30	SV (DEL)	UL-ONT	SVIM	0.851716	0.78081	0.814723	2209	1370	7869	HGSVC (Freeze 4)
HG002	30	SV (INS)	UL-ONT	SVIM	0.812991	0.712647	0.759519	4633	2643	11490	HGSVC (Freeze 4)
HG002	30	SV (DEL)	UL-ONT	Delly	0.812209	0.792983	0.802481	1959	1735	7504	HGSVC (Freeze 4)
HG002	30	SV (INS)	UL-ONT	Delly	0.755466	0.822067	0.78736	2311	3456	10677	HGSVC (Freeze 4)
HG00733	5	SV (DEL)	HiFi	cuteSV	0.634743	0.832793	0.720405	1187	3402	5912	HGSVC (Freeze 4)
HG00733	5	SV (INS)	HiFi	cuteSV	0.597512	0.864686	0.70669	1353	5824	8646	HGSVC (Freeze 4)
HG00733	5	SV (DEL)	HiFi	PBSV	0.473051	0.856698	0.609532	737	4908	4406	HGSVC (Freeze 4)
HG00733	5	SV (INS)	HiFi	PBSV	0.441672	0.881396	0.588463	860	8079	6391	HGSVC (Freeze 4)
HG00733	5	SV (DEL)	HiFi	Sniffles	0.659008	0.829123	0.734342	1265	3176	6138	HGSVC (Freeze 4)
HG00733	5	SV (INS)	HiFi	Sniffles	0.649758	0.846112	0.735048	1710	5068	9402	HGSVC (Freeze 4)
HG00733	5	SV (DEL)	HiFi	SVIM	0.443419	0.843718	0.581322	765	5184	4130	HGSVC (Freeze 4)
HG00733	5	SV (INS)	HiFi	SVIM	0.414858	0.84585	0.556684	1094	8467	6003	HGSVC (Freeze 4)
HG00733	5	SV (DEL)	HiFi	Delly	0.453833	0.910403	0.605718	416	5087	4227	HGSVC (Freeze 4)
HG00733	5	SV (INS)	HiFi	Delly	0.403663	0.915087	0.560207	542	8629	5841	HGSVC (Freeze 4)
HG00733	5	SV (DEL)	ONT	cuteSV	0.622182	0.751037	0.680564	1921	3519	5795	HGSVC (Freeze 4)
HG00733	5	SV (INS)	ONT	cuteSV	0.590048	0.786188	0.674141	2322	5932	8538	HGSVC (Freeze 4)
HG00733	5	SV (DEL)	ONT	Sniffles	0.643869	0.803241	0.714779	1469	3317	5997	HGSVC (Freeze 4)
HG00733	5	SV (INS)	ONT	Sniffles	0.614444	0.815239	0.700741	2015	5579	8891	HGSVC (Freeze 4)
HG00733	5	SV (DEL)	ONT	SVIM	0.438265	0.824813	0.57239	867	5232	4082	HGSVC (Freeze 4)
HG00733	5	SV (INS)	ONT	SVIM	0.397374	0.773785	0.52509	1681	8720	5750	HGSVC (Freeze 4)
HG00733	5	SV (DEL)	ONT	Delly	0.452115	0.886526	0.598834	539	5103	4211	HGSVC (Freeze 4)
HG00733	5	SV (INS)	ONT	Delly	0.398203	0.898487	0.551836	651	8708	5762	HGSVC (Freeze 4)
HG00733	5	SV (DEL)	UL-ONT	cuteSV	0.606077	0.738874	0.66592	1995	3669	5645	HGSVC (Freeze 4)
HG00733	5	SV (INS)	UL-ONT	cuteSV	0.574637	0.75208	0.651493	2741	6155	8315	HGSVC (Freeze 4)
HG00733	5	SV (DEL)	UL-ONT	Sniffles	0.620464	0.803643	0.700273	1412	3535	5779	HGSVC (Freeze 4)
HG00733	5	SV (INS)	UL-ONT	Sniffles	0.606012	0.779813	0.682014	2476	5701	8769	HGSVC (Freeze 4)
HG00733	5	SV (DEL)	UL-ONT	SVIM	0.4067	0.836757	0.547359	739	5526	3788	HGSVC (Freeze 4)
HG00733	5	SV (INS)	UL-ONT	SVIM	0.381548	0.74187	0.503925	1921	8949	5521	HGSVC (Freeze 4)
HG00733	5	SV (DEL)	UL-ONT	Delly	0.439446	0.883064	0.586852	542	5221	4093	HGSVC (Freeze 4)
HG00733	5	SV (INS)	UL-ONT	Delly	0.415826	0.901018	0.569037	661	8453	6017	HGSVC (Freeze 4)
HG00733	8	SV (DEL)	HiFi	cuteSV	0.669315	0.831644	0.741701	1262	3080	6234	HGSVC (Freeze 4)
HG00733	8	SV (INS)	HiFi	cuteSV	0.628404	0.868813	0.729307	1373	5377	9093	HGSVC (Freeze 4)
HG00733	8	SV (DEL)	HiFi	PBSV	0.660941	0.844213	0.741419	1136	3158	6156	HGSVC (Freeze 4)
HG00733	8	SV (INS)	HiFi	PBSV	0.626745	0.871935	0.729283	1332	5401	9069	HGSVC (Freeze 4)
HG00733	8	SV (DEL)	HiFi	Sniffles	0.779042	0.823797	0.800795	1552	2058	7256	HGSVC (Freeze 4)
HG00733	8	SV (INS)	HiFi	Sniffles	0.764755	0.83986	0.80055	2110	3404	11066	HGSVC (Freeze 4)
HG00733	8	SV (DEL)	HiFi	SVIM	0.690895	0.825317	0.752148	1362	2879	6435	HGSVC (Freeze 4)
HG00733	8	SV (INS)	HiFi	SVIM	0.667519	0.831382	0.740494	1959	4811	9659	HGSVC (Freeze 4)
HG00733	8	SV (DEL)	HiFi	Delly	0.642903	0.896407	0.748781	692	3326	5988	HGSVC (Freeze 4)
HG00733	8	SV (INS)	HiFi	Delly	0.587077	0.911676	0.714226	823	5975	8495	HGSVC (Freeze 4)
HG00733	8	SV (DEL)	ONT	cuteSV	0.648379	0.764334	0.701597	1862	3275	6039	HGSVC (Freeze 4)
HG00733	8	SV (INS)	ONT	cuteSV	0.611887	0.818753	0.700364	1960	5616	8854	HGSVC (Freeze 4)
HG00733	8	SV (DEL)	ONT	Sniffles	0.748121	0.79771	0.77212	1767	2346	6968	HGSVC (Freeze 4)
HG00733	8	SV (INS)	ONT	Sniffles	0.713269	0.808349	0.757838	2447	4149	10321	HGSVC (Freeze 4)
HG00733	8	SV (DEL)	ONT	SVIM	0.666201	0.79982	0.726921	1553	3109	6205	HGSVC (Freeze 4)
HG00733	8	SV (INS)	ONT	SVIM	0.627782	0.745568	0.681624	3100	5386	9084	HGSVC (Freeze 4)
HG00733	8	SV (DEL)	ONT	Delly	0.629482	0.861319	0.727374	944	3451	5863	HGSVC (Freeze 4)
HG00733	8	SV (INS)	ONT	Delly	0.570007	0.887836	0.694276	1042	6222	8248	HGSVC (Freeze 4)
HG00733	8	SV (DEL)	UL-ONT	cuteSV	0.636676	0.745349	0.68674	2026	3384	5930	HGSVC (Freeze 4)
HG00733	8	SV (INS)	UL-ONT	cuteSV	0.604147	0.792925	0.685782	2283	5728	8742	HGSVC (Freeze 4)
HG00733	8	SV (DEL)	UL-ONT	Sniffles	0.736204	0.792534	0.763331	1795	2457	6857	HGSVC (Freeze 4)
HG00733	8	SV (INS)	UL-ONT	Sniffles	0.704423	0.77097	0.736196	3028	4277	10193	HGSVC (Freeze 4)
HG00733	8	SV (DEL)	UL-ONT	SVIM	0.650633	0.800634	0.717882	1509	3254	6060	HGSVC (Freeze 4)
HG00733	8	SV (INS)	UL-ONT	SVIM	0.621078	0.704918	0.660348	3762	5483	8987	HGSVC (Freeze 4)
HG00733	8	SV (DEL)	UL-ONT	Delly	0.626047	0.863724	0.725926	920	3483	5831	HGSVC (Freeze 4)
HG00733	8	SV (INS)	UL-ONT	Delly	0.587422	0.877465	0.70373	1187	5970	8500	HGSVC (Freeze 4)
HG00733	10	SV (DEL)	HiFi	cuteSV	0.720528	0.834909	0.773513	1327	2603	6711	HGSVC (Freeze 4)
HG00733	10	SV (INS)	HiFi	cuteSV	0.674983	0.872677	0.761203	1425	4703	9767	HGSVC (Freeze 4)
HG00733	10	SV (DEL)	HiFi	PBSV	0.717629	0.842981	0.775271	1245	2630	6684	HGSVC (Freeze 4)
HG00733	10	SV (INS)	HiFi	PBSV	0.683898	0.859401	0.76167	1619	4574	9896	HGSVC (Freeze 4)
HG00733	10	SV (DEL)	HiFi	Sniffles	0.805132	0.82028	0.812635	1643	1815	7499	HGSVC (Freeze 4)
HG00733	10	SV (INS)	HiFi	Sniffles	0.789565	0.838409	0.813254	2202	3045	11425	HGSVC (Freeze 4)
HG00733	10	SV (DEL)	HiFi	SVIM	0.766803	0.819695	0.792367	1571	2172	7142	HGSVC (Freeze 4)
HG00733	10	SV (INS)	HiFi	SVIM	0.745543	0.817706	0.779959	2405	3682	10788	HGSVC (Freeze 4)
HG00733	10	SV (DEL)	HiFi	Delly	0.703135	0.89187	0.786336	794	2765	6549	HGSVC (Freeze 4)
HG00733	10	SV (INS)	HiFi	Delly	0.642916	0.901104	0.750423	1021	5167	9303	HGSVC (Freeze 4)
HG00733	10	SV (DEL)	ONT	cuteSV	0.719562	0.770345	0.744088	1998	2612	6702	HGSVC (Freeze 4)
HG00733	10	SV (INS)	ONT	cuteSV	0.671458	0.810207	0.734336	2276	4754	9716	HGSVC (Freeze 4)
HG00733	10	SV (DEL)	ONT	Sniffles	0.781834	0.801541	0.791565	1803	2032	7282	HGSVC (Freeze 4)
HG00733	10	SV (INS)	ONT	Sniffles	0.733932	0.810873	0.770486	2477	3850	10620	HGSVC (Freeze 4)
HG00733	10	SV (DEL)	ONT	SVIM	0.75714	0.787317	0.771934	1905	2262	7052	HGSVC (Freeze 4)
HG00733	10	SV (INS)	ONT	SVIM	0.711334	0.722265	0.716758	3958	4177	10293	HGSVC (Freeze 4)
HG00733	10	SV (DEL)	ONT	Delly	0.707859	0.846994	0.771201	1191	2721	6593	HGSVC (Freeze 4)
HG00733	10	SV (INS)	ONT	Delly	0.631997	0.873281	0.733301	1327	5325	9145	HGSVC (Freeze 4)
HG00733	10	SV (DEL)	UL-ONT	cuteSV	0.688533	0.744832	0.715577	2197	2901	6413	HGSVC (Freeze 4)
HG00733	10	SV (INS)	UL-ONT	cuteSV	0.661576	0.789917	0.720072	2546	4897	9573	HGSVC (Freeze 4)
HG00733	10	SV (DEL)	UL-ONT	Sniffles	0.7551	0.798569	0.776226	1774	2281	7033	HGSVC (Freeze 4)
HG00733	10	SV (INS)	UL-ONT	Sniffles	0.731099	0.776383	0.753061	3047	3891	10579	HGSVC (Freeze 4)
HG00733	10	SV (DEL)	UL-ONT	SVIM	0.731587	0.791589	0.760406	1794	2500	6814	HGSVC (Freeze 4)
HG00733	10	SV (INS)	UL-ONT	SVIM	0.700898	0.68209	0.691366	4727	4328	10142	HGSVC (Freeze 4)
HG00733	10	SV (DEL)	UL-ONT	Delly	0.705068	0.861246	0.77537	1058	2747	6567	HGSVC (Freeze 4)
HG00733	10	SV (INS)	UL-ONT	Delly	0.64727	0.867946	0.741538	1425	5104	9366	HGSVC (Freeze 4)
HG00733	12	SV (DEL)	HiFi	cuteSV	0.717951	0.839232	0.773869	1281	2627	6687	HGSVC (Freeze 4)
HG00733	12	SV (INS)	HiFi	cuteSV	0.667381	0.869295	0.755073	1452	4813	9657	HGSVC (Freeze 4)
HG00733	12	SV (DEL)	HiFi	PBSV	0.76122	0.838755	0.798109	1363	2224	7090	HGSVC (Freeze 4)
HG00733	12	SV (INS)	HiFi	PBSV	0.726745	0.853018	0.784835	1812	3954	10516	HGSVC (Freeze 4)
HG00733	12	SV (DEL)	HiFi	Sniffles	0.823492	0.822608	0.82305	1654	1644	7670	HGSVC (Freeze 4)
HG00733	12	SV (INS)	HiFi	Sniffles	0.809191	0.841345	0.824955	2208	2761	11709	HGSVC (Freeze 4)
HG00733	12	SV (DEL)	HiFi	SVIM	0.752738	0.832463	0.790595	1411	2303	7011	HGSVC (Freeze 4)
HG00733	12	SV (INS)	HiFi	SVIM	0.733172	0.840983	0.783386	2006	3861	10609	HGSVC (Freeze 4)
HG00733	12	SV (DEL)	HiFi	Delly	0.748873	0.888875	0.81289	872	2339	6975	HGSVC (Freeze 4)
HG00733	12	SV (INS)	HiFi	Delly	0.684727	0.896003	0.776246	1150	4562	9908	HGSVC (Freeze 4)
HG00733	12	SV (DEL)	ONT	cuteSV	0.708611	0.778761	0.742032	1875	2714	6600	HGSVC (Freeze 4)
HG00733	12	SV (INS)	ONT	cuteSV	0.659157	0.828095	0.734031	1980	4932	9538	HGSVC (Freeze 4)
HG00733	12	SV (DEL)	ONT	Sniffles	0.792141	0.802131	0.797105	1820	1936	7378	HGSVC (Freeze 4)
HG00733	12	SV (INS)	ONT	Sniffles	0.748583	0.81597	0.780825	2443	3638	10832	HGSVC (Freeze 4)
HG00733	12	SV (DEL)	ONT	SVIM	0.727292	0.817918	0.769948	1508	2540	6774	HGSVC (Freeze 4)
HG00733	12	SV (INS)	ONT	SVIM	0.675536	0.758693	0.714704	3109	4695	9775	HGSVC (Freeze 4)
HG00733	12	SV (DEL)	ONT	Delly	0.738029	0.838497	0.785062	1324	2440	6874	HGSVC (Freeze 4)
HG00733	12	SV (INS)	ONT	Delly	0.671458	0.863184	0.755345	1540	4754	9716	HGSVC (Freeze 4)
HG00733	12	SV (DEL)	UL-ONT	cuteSV	0.68746	0.761175	0.722442	2009	2911	6403	HGSVC (Freeze 4)
HG00733	12	SV (INS)	UL-ONT	cuteSV	0.652177	0.809001	0.722173	2228	5033	9437	HGSVC (Freeze 4)
HG00733	12	SV (DEL)	UL-ONT	Sniffles	0.777324	0.798236	0.787641	1830	2074	7240	HGSVC (Freeze 4)
HG00733	12	SV (INS)	UL-ONT	Sniffles	0.745819	0.784473	0.764658	2965	3678	10792	HGSVC (Freeze 4)
HG00733	12	SV (DEL)	UL-ONT	SVIM	0.704531	0.818	0.757037	1460	2752	6562	HGSVC (Freeze 4)
HG00733	12	SV (INS)	UL-ONT	SVIM	0.665584	0.730064	0.696334	3561	4839	9631	HGSVC (Freeze 4)
HG00733	12	SV (DEL)	UL-ONT	Delly	0.740391	0.847487	0.790327	1241	2418	6896	HGSVC (Freeze 4)
HG00733	12	SV (INS)	UL-ONT	Delly	0.679267	0.860683	0.759289	1591	4641	9829	HGSVC (Freeze 4)
HG00733	15	SV (DEL)	HiFi	cuteSV	0.769916	0.839794	0.803338	1368	2143	7171	HGSVC (Freeze 4)
HG00733	15	SV (INS)	HiFi	cuteSV	0.712716	0.871325	0.78408	1523	4157	10313	HGSVC (Freeze 4)
HG00733	15	SV (DEL)	HiFi	PBSV	0.78484	0.829927	0.806754	1498	2004	7310	HGSVC (Freeze 4)
HG00733	15	SV (INS)	HiFi	PBSV	0.756945	0.845661	0.798848	1999	3517	10953	HGSVC (Freeze 4)
HG00733	15	SV (DEL)	HiFi	Sniffles	0.837878	0.820869	0.829286	1703	1510	7804	HGSVC (Freeze 4)
HG00733	15	SV (INS)	HiFi	Sniffles	0.82094	0.839743	0.830235	2267	2591	11879	HGSVC (Freeze 4)
HG00733	15	SV (DEL)	HiFi	SVIM	0.812433	0.828352	0.820315	1568	1747	7567	HGSVC (Freeze 4)
HG00733	15	SV (INS)	HiFi	SVIM	0.799032	0.825268	0.811938	2448	2908	11562	HGSVC (Freeze 4)
HG00733	15	SV (DEL)	HiFi	Delly	0.772171	0.877394	0.821427	1005	2122	7192	HGSVC (Freeze 4)
HG00733	15	SV (INS)	HiFi	Delly	0.716379	0.885453	0.791993	1341	4104	10366	HGSVC (Freeze 4)
HG00733	15	SV (DEL)	ONT	cuteSV	0.764333	0.769538	0.766927	2132	2195	7119	HGSVC (Freeze 4)
HG00733	15	SV (INS)	ONT	cuteSV	0.714167	0.823952	0.765141	2208	4136	10334	HGSVC (Freeze 4)
HG00733	15	SV (DEL)	ONT	Sniffles	0.803522	0.805511	0.804515	1807	1830	7484	HGSVC (Freeze 4)
HG00733	15	SV (INS)	ONT	Sniffles	0.761437	0.819609	0.789453	2425	3452	11018	HGSVC (Freeze 4)
HG00733	15	SV (DEL)	ONT	SVIM	0.790638	0.794562	0.792595	1904	1950	7364	HGSVC (Freeze 4)
HG00733	15	SV (INS)	ONT	SVIM	0.748721	0.736356	0.742487	3879	3636	10834	HGSVC (Freeze 4)
HG00733	15	SV (DEL)	ONT	Delly	0.776895	0.822834	0.799205	1558	2078	7236	HGSVC (Freeze 4)
HG00733	15	SV (INS)	ONT	Delly	0.707326	0.856916	0.774968	1709	4235	10235	HGSVC (Freeze 4)
HG00733	15	SV (DEL)	UL-ONT	cuteSV	0.74329	0.749648	0.746455	2312	2391	6923	HGSVC (Freeze 4)
HG00733	15	SV (INS)	UL-ONT	cuteSV	0.706704	0.799969	0.750449	2557	4244	10226	HGSVC (Freeze 4)
HG00733	15	SV (DEL)	UL-ONT	Sniffles	0.788383	0.801025	0.794654	1824	1971	7343	HGSVC (Freeze 4)
HG00733	15	SV (INS)	UL-ONT	Sniffles	0.756116	0.789736	0.77256	2913	3529	10941	HGSVC (Freeze 4)
HG00733	15	SV (DEL)	UL-ONT	SVIM	0.770883	0.799466	0.784914	1801	2134	7180	HGSVC (Freeze 4)
HG00733	15	SV (INS)	UL-ONT	SVIM	0.738148	0.702051	0.719647	4533	3789	10681	HGSVC (Freeze 4)
HG00733	15	SV (DEL)	UL-ONT	Delly	0.769272	0.834692	0.800648	1419	2149	7165	HGSVC (Freeze 4)
HG00733	15	SV (INS)	UL-ONT	Delly	0.713269	0.848139	0.774879	1848	4149	10321	HGSVC (Freeze 4)
HG00733	17	SV (DEL)	HiFi	cuteSV	0.784733	0.837324	0.810176	1420	2005	7309	HGSVC (Freeze 4)
HG00733	17	SV (INS)	HiFi	cuteSV	0.726469	0.869551	0.791596	1577	3958	10512	HGSVC (Freeze 4)
HG00733	17	SV (DEL)	HiFi	PBSV	0.795791	0.828249	0.811696	1537	1902	7412	HGSVC (Freeze 4)
HG00733	17	SV (INS)	HiFi	PBSV	0.764755	0.837509	0.79948	2147	3404	11066	HGSVC (Freeze 4)
HG00733	17	SV (DEL)	HiFi	Sniffles	0.844428	0.819356	0.831703	1734	1449	7865	HGSVC (Freeze 4)
HG00733	17	SV (INS)	HiFi	Sniffles	0.826883	0.842072	0.834408	2244	2505	11965	HGSVC (Freeze 4)
HG00733	17	SV (DEL)	HiFi	SVIM	0.835624	0.818402	0.826923	1727	1531	7783	HGSVC (Freeze 4)
HG00733	17	SV (INS)	HiFi	SVIM	0.825086	0.816845	0.820945	2677	2531	11939	HGSVC (Freeze 4)
HG00733	17	SV (DEL)	HiFi	Delly	0.786021	0.873107	0.827278	1064	1993	7321	HGSVC (Freeze 4)
HG00733	17	SV (INS)	HiFi	Delly	0.72944	0.882673	0.798774	1403	3915	10555	HGSVC (Freeze 4)
HG00733	17	SV (DEL)	ONT	cuteSV	0.783444	0.769645	0.776483	2184	2017	7297	HGSVC (Freeze 4)
HG00733	17	SV (INS)	ONT	cuteSV	0.73331	0.822303	0.775261	2293	3859	10611	HGSVC (Freeze 4)
HG00733	17	SV (DEL)	ONT	Sniffles	0.811681	0.809422	0.81055	1780	1754	7560	HGSVC (Freeze 4)
HG00733	17	SV (INS)	ONT	Sniffles	0.764686	0.821272	0.791969	2408	3405	11065	HGSVC (Freeze 4)
HG00733	17	SV (DEL)	ONT	SVIM	0.81662	0.794443	0.805379	1968	1708	7606	HGSVC (Freeze 4)
HG00733	17	SV (INS)	ONT	SVIM	0.768348	0.722136	0.744526	4278	3352	11118	HGSVC (Freeze 4)
HG00733	17	SV (DEL)	ONT	Delly	0.790208	0.818414	0.804064	1633	1954	7360	HGSVC (Freeze 4)
HG00733	17	SV (INS)	ONT	Delly	0.719281	0.848663	0.778634	1856	4062	10408	HGSVC (Freeze 4)
HG00733	17	SV (DEL)	UL-ONT	cuteSV	0.786665	0.732114	0.75841	2681	1987	7327	HGSVC (Freeze 4)
HG00733	17	SV (INS)	UL-ONT	cuteSV	0.746648	0.792838	0.76905	2823	3666	10804	HGSVC (Freeze 4)
HG00733	17	SV (DEL)	UL-ONT	Sniffles	0.812433	0.793852	0.803035	1965	1747	7567	HGSVC (Freeze 4)
HG00733	17	SV (INS)	UL-ONT	Sniffles	0.771942	0.787674	0.779728	3011	3300	11170	HGSVC (Freeze 4)
HG00733	17	SV (DEL)	UL-ONT	SVIM	0.816191	0.78355	0.799537	2100	1712	7602	HGSVC (Freeze 4)
HG00733	17	SV (INS)	UL-ONT	SVIM	0.78839	0.715594	0.75023	4534	3062	11408	HGSVC (Freeze 4)
HG00733	17	SV (DEL)	UL-ONT	Delly	0.786773	0.827368	0.80656	1529	1986	7328	HGSVC (Freeze 4)
HG00733	17	SV (INS)	UL-ONT	Delly	0.726261	0.84173	0.779744	1976	3961	10509	HGSVC (Freeze 4)
HG00733	20	SV (DEL)	HiFi	cuteSV	0.800837	0.834247	0.817201	1482	1855	7459	HGSVC (Freeze 4)
HG00733	20	SV (INS)	HiFi	cuteSV	0.740083	0.869378	0.799537	1609	3761	10709	HGSVC (Freeze 4)
HG00733	20	SV (DEL)	HiFi	PBSV	0.805347	0.824648	0.814883	1595	1813	7501	HGSVC (Freeze 4)
HG00733	20	SV (INS)	HiFi	PBSV	0.776572	0.837644	0.805953	2178	3233	11237	HGSVC (Freeze 4)
HG00733	20	SV (DEL)	HiFi	Sniffles	0.852588	0.819589	0.835763	1748	1373	7941	HGSVC (Freeze 4)
HG00733	20	SV (INS)	HiFi	Sniffles	0.831652	0.841597	0.836595	2265	2436	12034	HGSVC (Freeze 4)
HG00733	20	SV (DEL)	HiFi	SVIM	0.854842	0.815194	0.834547	1805	1352	7962	HGSVC (Freeze 4)
HG00733	20	SV (INS)	HiFi	SVIM	0.845266	0.8077	0.826056	2912	2239	12231	HGSVC (Freeze 4)
HG00733	20	SV (DEL)	HiFi	Delly	0.794396	0.86802	0.829577	1125	1915	7399	HGSVC (Freeze 4)
HG00733	20	SV (INS)	HiFi	Delly	0.73877	0.878389	0.802553	1480	3780	10690	HGSVC (Freeze 4)
HG00733	20	SV (DEL)	ONT	cuteSV	0.798261	0.762877	0.780168	2311	1879	7435	HGSVC (Freeze 4)
HG00733	20	SV (INS)	ONT	cuteSV	0.750726	0.822581	0.785012	2343	3607	10863	HGSVC (Freeze 4)
HG00733	20	SV (DEL)	ONT	Sniffles	0.820593	0.808355	0.814428	1812	1671	7643	HGSVC (Freeze 4)
HG00733	20	SV (INS)	ONT	Sniffles	0.771873	0.828561	0.799213	2311	3301	11169	HGSVC (Freeze 4)
HG00733	20	SV (DEL)	ONT	SVIM	0.834121	0.782929	0.807714	2154	1545	7769	HGSVC (Freeze 4)
HG00733	20	SV (INS)	ONT	SVIM	0.786455	0.717936	0.750635	4471	3090	11380	HGSVC (Freeze 4)
HG00733	20	SV (DEL)	ONT	Delly	0.800193	0.808176	0.804165	1769	1861	7453	HGSVC (Freeze 4)
HG00733	20	SV (INS)	ONT	Delly	0.728334	0.843727	0.781796	1952	3931	10539	HGSVC (Freeze 4)
HG00733	20	SV (DEL)	UL-ONT	cuteSV	0.79912	0.731427	0.763776	2733	1871	7443	HGSVC (Freeze 4)
HG00733	20	SV (INS)	UL-ONT	cuteSV	0.7566	0.787116	0.771556	2961	3522	10948	HGSVC (Freeze 4)
HG00733	20	SV (DEL)	UL-ONT	Sniffles	0.820485	0.793892	0.806969	1984	1672	7642	HGSVC (Freeze 4)
HG00733	20	SV (INS)	UL-ONT	Sniffles	0.777885	0.791172	0.784472	2971	3214	11256	HGSVC (Freeze 4)
HG00733	20	SV (DEL)	UL-ONT	SVIM	0.836483	0.774684	0.804398	2266	1523	7791	HGSVC (Freeze 4)
HG00733	20	SV (INS)	UL-ONT	SVIM	0.80622	0.703958	0.751627	4906	2804	11666	HGSVC (Freeze 4)
HG00733	20	SV (DEL)	UL-ONT	Delly	0.793751	0.820351	0.806832	1619	1921	7393	HGSVC (Freeze 4)
HG00733	20	SV (INS)	UL-ONT	Delly	0.736006	0.838847	0.784068	2046	3820	10650	HGSVC (Freeze 4)
HG00733	25	SV (DEL)	HiFi	cuteSV	0.808782	0.832008	0.820231	1521	1781	7533	HGSVC (Freeze 4)
HG00733	25	SV (INS)	HiFi	cuteSV	0.745957	0.867267	0.802051	1652	3676	10794	HGSVC (Freeze 4)
HG00733	25	SV (DEL)	HiFi	PBSV	0.806957	0.814743	0.810831	1709	1798	7516	HGSVC (Freeze 4)
HG00733	25	SV (INS)	HiFi	PBSV	0.779475	0.832829	0.805269	2264	3191	11279	HGSVC (Freeze 4)
HG00733	25	SV (DEL)	HiFi	Sniffles	0.859137	0.822997	0.840679	1721	1312	8002	HGSVC (Freeze 4)
HG00733	25	SV (INS)	HiFi	Sniffles	0.836904	0.841557	0.839224	2280	2360	12110	HGSVC (Freeze 4)
HG00733	25	SV (DEL)	HiFi	SVIM	0.859674	0.817124	0.837859	1792	1307	8007	HGSVC (Freeze 4)
HG00733	25	SV (INS)	HiFi	SVIM	0.848721	0.813096	0.830527	2823	2189	12281	HGSVC (Freeze 4)
HG00733	25	SV (DEL)	HiFi	Delly	0.798583	0.857901	0.82718	1232	1876	7438	HGSVC (Freeze 4)
HG00733	25	SV (INS)	HiFi	Delly	0.746164	0.867229	0.802155	1653	3673	10797	HGSVC (Freeze 4)
HG00733	25	SV (DEL)	ONT	cuteSV	0.804488	0.761097	0.782191	2352	1821	7493	HGSVC (Freeze 4)
HG00733	25	SV (INS)	ONT	cuteSV	0.756669	0.823295	0.788577	2350	3521	10949	HGSVC (Freeze 4)
HG00733	25	SV (DEL)	ONT	Sniffles	0.819519	0.808495	0.81397	1808	1681	7633	HGSVC (Freeze 4)
HG00733	25	SV (INS)	ONT	Sniffles	0.771735	0.827063	0.798441	2335	3303	11167	HGSVC (Freeze 4)
HG00733	25	SV (DEL)	ONT	SVIM	0.832832	0.790966	0.811359	2050	1557	7757	HGSVC (Freeze 4)
HG00733	25	SV (INS)	ONT	SVIM	0.78839	0.732738	0.759546	4161	3062	11408	HGSVC (Freeze 4)
HG00733	25	SV (DEL)	ONT	Delly	0.801052	0.793217	0.797115	1945	1853	7461	HGSVC (Freeze 4)
HG00733	25	SV (INS)	ONT	Delly	0.737941	0.832722	0.782472	2145	3792	10678	HGSVC (Freeze 4)
HG00733	25	SV (DEL)	UL-ONT	cuteSV	0.812433	0.729631	0.768809	2804	1747	7567	HGSVC (Freeze 4)
HG00733	25	SV (INS)	UL-ONT	cuteSV	0.768556	0.792659	0.780421	2909	3349	11121	HGSVC (Freeze 4)
HG00733	25	SV (DEL)	UL-ONT	Sniffles	0.82274	0.795495	0.808888	1970	1651	7663	HGSVC (Freeze 4)
HG00733	25	SV (INS)	UL-ONT	Sniffles	0.779198	0.795527	0.787278	2898	3195	11275	HGSVC (Freeze 4)
HG00733	25	SV (DEL)	UL-ONT	SVIM	0.837449	0.783841	0.809759	2151	1514	7800	HGSVC (Freeze 4)
HG00733	25	SV (INS)	UL-ONT	SVIM	0.808708	0.7203	0.761948	4544	2768	11702	HGSVC (Freeze 4)
HG00733	25	SV (DEL)	UL-ONT	Delly	0.800945	0.805616	0.803273	1800	1854	7460	HGSVC (Freeze 4)
HG00733	25	SV (INS)	UL-ONT	Delly	0.741465	0.82843	0.782539	2222	3741	10729	HGSVC (Freeze 4)
HG00733	30	SV (DEL)	HiFi	cuteSV	0.812003	0.829731	0.820772	1552	1751	7563	HGSVC (Freeze 4)
HG00733	30	SV (INS)	HiFi	cuteSV	0.75197	0.865151	0.804599	1696	3589	10881	HGSVC (Freeze 4)
HG00733	30	SV (DEL)	HiFi	PBSV	0.809427	0.812305	0.810863	1742	1775	7539	HGSVC (Freeze 4)
HG00733	30	SV (INS)	HiFi	PBSV	0.780788	0.826602	0.803042	2370	3172	11298	HGSVC (Freeze 4)
HG00733	30	SV (DEL)	HiFi	Sniffles	0.858063	0.821631	0.839452	1735	1322	7992	HGSVC (Freeze 4)
HG00733	30	SV (INS)	HiFi	Sniffles	0.83877	0.844842	0.841795	2229	2333	12137	HGSVC (Freeze 4)
HG00733	30	SV (DEL)	HiFi	SVIM	0.863753	0.814189	0.838239	1836	1269	8045	HGSVC (Freeze 4)
HG00733	30	SV (INS)	HiFi	SVIM	0.861576	0.813507	0.836852	2858	2003	12467	HGSVC (Freeze 4)
HG00733	30	SV (DEL)	HiFi	Delly	0.800623	0.853497	0.826215	1280	1857	7457	HGSVC (Freeze 4)
HG00733	30	SV (INS)	HiFi	Delly	0.750518	0.865753	0.804028	1684	3610	10860	HGSVC (Freeze 4)
HG00733	30	SV (DEL)	ONT	cuteSV	0.818875	0.755149	0.785722	2473	1687	7627	HGSVC (Freeze 4)
HG00733	30	SV (INS)	ONT	cuteSV	0.763649	0.824258	0.792797	2356	3420	11050	HGSVC (Freeze 4)
HG00733	30	SV (DEL)	ONT	Sniffles	0.822525	0.813442	0.817959	1757	1653	7661	HGSVC (Freeze 4)
HG00733	30	SV (INS)	ONT	Sniffles	0.770905	0.830541	0.799613	2276	3315	11155	HGSVC (Freeze 4)
HG00733	30	SV (DEL)	ONT	SVIM	0.84067	0.789474	0.814268	2088	1484	7830	HGSVC (Freeze 4)
HG00733	30	SV (INS)	ONT	SVIM	0.797858	0.73521	0.765254	4158	2925	11545	HGSVC (Freeze 4)
HG00733	30	SV (DEL)	ONT	Delly	0.807065	0.77961	0.7931	2125	1797	7517	HGSVC (Freeze 4)
HG00733	30	SV (INS)	ONT	Delly	0.740636	0.829939	0.782748	2196	3753	10717	HGSVC (Freeze 4)
HG00733	30	SV (DEL)	UL-ONT	cuteSV	0.822096	0.725369	0.77071	2899	1657	7657	HGSVC (Freeze 4)
HG00733	30	SV (INS)	UL-ONT	cuteSV	0.773739	0.793536	0.783512	2913	3274	11196	HGSVC (Freeze 4)
HG00733	30	SV (DEL)	UL-ONT	Sniffles	0.824887	0.79948	0.811985	1927	1631	7683	HGSVC (Freeze 4)
HG00733	30	SV (INS)	UL-ONT	Sniffles	0.777609	0.803026	0.790113	2760	3218	11252	HGSVC (Freeze 4)
HG00733	30	SV (DEL)	UL-ONT	SVIM	0.844857	0.78081	0.811572	2209	1445	7869	HGSVC (Freeze 4)
HG00733	30	SV (INS)	UL-ONT	SVIM	0.815342	0.715898	0.762391	4682	2672	11798	HGSVC (Freeze 4)
HG00733	30	SV (DEL)	UL-ONT	Delly	0.805132	0.795565	0.80032	1927	1815	7499	HGSVC (Freeze 4)
HG00733	30	SV (INS)	UL-ONT	Delly	0.7434	0.821145	0.780341	2343	3713	10757	HGSVC (Freeze 4)
HG002_DUPLEX	5	SV (DEL)	ONT	cuteSV	0.663492	0.708916	0.685452	2517	3109	6130	HGSVC (Freeze 4)
HG002_DUPLEX	5	SV (INS)	ONT	cuteSV	0.657751	0.777388	0.712583	2662	4837	9296	HGSVC (Freeze 4)
HG002_DUPLEX	5	SV (DEL)	ONT	Sniffles	0.670635	0.787294	0.724297	1674	3043	6196	HGSVC (Freeze 4)
HG002_DUPLEX	5	SV (INS)	ONT	Sniffles	0.669638	0.831854	0.741984	1913	4669	9464	HGSVC (Freeze 4)
HG002_DUPLEX	5	SV (DEL)	ONT	SVIM	0.458924	0.800302	0.583339	1058	4999	4240	HGSVC (Freeze 4)
HG002_DUPLEX	5	SV (INS)	ONT	SVIM	0.445765	0.821275	0.577876	1371	7833	6300	HGSVC (Freeze 4)
HG002_DUPLEX	5	SV (DEL)	ONT	Delly	0.473644	0.872234	0.613917	641	4863	4376	HGSVC (Freeze 4)
HG002_DUPLEX	5	SV (INS)	ONT	Delly	0.447463	0.897149	0.597111	725	7809	6324	HGSVC (Freeze 4)
HG002_DUPLEX	8	SV (DEL)	ONT	cuteSV	0.700833	0.731969	0.716063	2371	2764	6475	HGSVC (Freeze 4)
HG002_DUPLEX	8	SV (INS)	ONT	cuteSV	0.681101	0.79725	0.734613	2448	4507	9626	HGSVC (Freeze 4)
HG002_DUPLEX	8	SV (DEL)	ONT	Sniffles	0.781037	0.777335	0.779182	2067	2023	7216	HGSVC (Freeze 4)
HG002_DUPLEX	8	SV (INS)	ONT	Sniffles	0.772306	0.826331	0.798405	2294	3218	10915	HGSVC (Freeze 4)
HG002_DUPLEX	8	SV (DEL)	ONT	SVIM	0.703756	0.799754	0.74869	1628	2737	6502	HGSVC (Freeze 4)
HG002_DUPLEX	8	SV (INS)	ONT	SVIM	0.679191	0.807725	0.737902	2285	4534	9599	HGSVC (Freeze 4)
HG002_DUPLEX	8	SV (DEL)	ONT	Delly	0.671934	0.865588	0.756566	964	3031	6208	HGSVC (Freeze 4)
HG002_DUPLEX	8	SV (INS)	ONT	Delly	0.62025	0.889047	0.730713	1094	5367	8766	HGSVC (Freeze 4)
HG002_DUPLEX	10	SV (DEL)	ONT	cuteSV	0.757982	0.728038	0.742709	2616	2236	7003	HGSVC (Freeze 4)
HG002_DUPLEX	10	SV (INS)	ONT	cuteSV	0.75115	0.785265	0.767829	2903	3517	10616	HGSVC (Freeze 4)
HG002_DUPLEX	10	SV (DEL)	ONT	Sniffles	0.811235	0.787125	0.798998	2027	1744	7495	HGSVC (Freeze 4)
HG002_DUPLEX	10	SV (INS)	ONT	Sniffles	0.801245	0.82183	0.811407	2455	2809	11324	HGSVC (Freeze 4)
HG002_DUPLEX	10	SV (DEL)	ONT	SVIM	0.781253	0.792577	0.786875	1889	2021	7218	HGSVC (Freeze 4)
HG002_DUPLEX	10	SV (INS)	ONT	SVIM	0.765584	0.7903	0.777746	2871	3313	10820	HGSVC (Freeze 4)
HG002_DUPLEX	10	SV (DEL)	ONT	Delly	0.731248	0.856382	0.788884	1133	2483	6756	HGSVC (Freeze 4)
HG002_DUPLEX	10	SV (INS)	ONT	Delly	0.686549	0.878418	0.770722	1343	4430	9703	HGSVC (Freeze 4)
HG002_DUPLEX	12	SV (DEL)	ONT	cuteSV	0.753653	0.733256	0.743315	2533	2276	6963	HGSVC (Freeze 4)
HG002_DUPLEX	12	SV (INS)	ONT	cuteSV	0.73431	0.796775	0.764268	2647	3755	10378	HGSVC (Freeze 4)
HG002_DUPLEX	12	SV (DEL)	ONT	Sniffles	0.826605	0.777936	0.801532	2180	1602	7637	HGSVC (Freeze 4)
HG002_DUPLEX	12	SV (INS)	ONT	Sniffles	0.815255	0.825476	0.820334	2436	2611	11522	HGSVC (Freeze 4)
HG002_DUPLEX	12	SV (DEL)	ONT	SVIM	0.763827	0.797942	0.780512	1787	2182	7057	HGSVC (Freeze 4)
HG002_DUPLEX	12	SV (INS)	ONT	SVIM	0.750725	0.809924	0.779202	2490	3523	10610	HGSVC (Freeze 4)
HG002_DUPLEX	12	SV (DEL)	ONT	Delly	0.769564	0.845824	0.805894	1296	2129	7110	HGSVC (Freeze 4)
HG002_DUPLEX	12	SV (INS)	ONT	Delly	0.717965	0.874214	0.788423	1460	3986	10147	HGSVC (Freeze 4)
HG002_DUPLEX	15	SV (DEL)	ONT	cuteSV	0.802901	0.72754	0.763365	2778	1821	7418	HGSVC (Freeze 4)
HG002_DUPLEX	15	SV (INS)	ONT	cuteSV	0.784759	0.785259	0.785009	3033	3042	11091	HGSVC (Freeze 4)
HG002_DUPLEX	15	SV (DEL)	ONT	Sniffles	0.839918	0.78092	0.809345	2177	1479	7760	HGSVC (Freeze 4)
HG002_DUPLEX	15	SV (INS)	ONT	Sniffles	0.824241	0.81989	0.82206	2559	2484	11649	HGSVC (Freeze 4)
HG002_DUPLEX	15	SV (DEL)	ONT	SVIM	0.821626	0.793042	0.807081	1981	1648	7591	HGSVC (Freeze 4)
HG002_DUPLEX	15	SV (INS)	ONT	SVIM	0.808887	0.793173	0.800953	2981	2701	11432	HGSVC (Freeze 4)
HG002_DUPLEX	15	SV (DEL)	ONT	Delly	0.795757	0.838217	0.816435	1419	1887	7352	HGSVC (Freeze 4)
HG002_DUPLEX	15	SV (INS)	ONT	Delly	0.742659	0.864936	0.799147	1639	3637	10496	HGSVC (Freeze 4)
HG002_DUPLEX	17	SV (DEL)	ONT	cuteSV	0.819569	0.71943	0.766242	2953	1667	7572	HGSVC (Freeze 4)
HG002_DUPLEX	17	SV (INS)	ONT	cuteSV	0.803439	0.784131	0.793667	3126	2778	11355	HGSVC (Freeze 4)
HG002_DUPLEX	17	SV (DEL)	ONT	Sniffles	0.846737	0.770511	0.806828	2330	1416	7823	HGSVC (Freeze 4)
HG002_DUPLEX	17	SV (INS)	ONT	Sniffles	0.832024	0.824788	0.82839	2498	2374	11759	HGSVC (Freeze 4)
HG002_DUPLEX	17	SV (DEL)	ONT	SVIM	0.841433	0.784698	0.812076	2133	1465	7774	HGSVC (Freeze 4)
HG002_DUPLEX	17	SV (INS)	ONT	SVIM	0.82884	0.789672	0.808782	3120	2419	11714	HGSVC (Freeze 4)
HG002_DUPLEX	17	SV (DEL)	ONT	Delly	0.804741	0.830726	0.817527	1515	1804	7435	HGSVC (Freeze 4)
HG002_DUPLEX	17	SV (INS)	ONT	Delly	0.752636	0.86039	0.802914	1726	3496	10637	HGSVC (Freeze 4)
HG002_DUPLEX	20	SV (DEL)	ONT	cuteSV	0.831692	0.717594	0.770442	3024	1555	7684	HGSVC (Freeze 4)
HG002_DUPLEX	20	SV (INS)	ONT	cuteSV	0.820845	0.778225	0.798967	3306	2532	11601	HGSVC (Freeze 4)
HG002_DUPLEX	20	SV (DEL)	ONT	Sniffles	0.84836	0.772521	0.808666	2308	1401	7838	HGSVC (Freeze 4)
HG002_DUPLEX	20	SV (INS)	ONT	Sniffles	0.835704	0.821749	0.828668	2562	2322	11811	HGSVC (Freeze 4)
HG002_DUPLEX	20	SV (DEL)	ONT	SVIM	0.852906	0.780198	0.814934	2220	1359	7880	HGSVC (Freeze 4)
HG002_DUPLEX	20	SV (INS)	ONT	SVIM	0.848581	0.780845	0.813305	3366	2140	11993	HGSVC (Freeze 4)
HG002_DUPLEX	20	SV (DEL)	ONT	Delly	0.810153	0.825977	0.817988	1577	1754	7485	HGSVC (Freeze 4)
HG002_DUPLEX	20	SV (INS)	ONT	Delly	0.761622	0.855916	0.80602	1812	3369	10764	HGSVC (Freeze 4)
HG002_DUPLEX	25	SV (DEL)	ONT	cuteSV	0.840567	0.716553	0.773622	3072	1473	7766	HGSVC (Freeze 4)
HG002_DUPLEX	25	SV (INS)	ONT	cuteSV	0.824453	0.779659	0.801431	3293	2481	11652	HGSVC (Freeze 4)
HG002_DUPLEX	25	SV (DEL)	ONT	Sniffles	0.856262	0.77757	0.815021	2263	1328	7911	HGSVC (Freeze 4)
HG002_DUPLEX	25	SV (INS)	ONT	Sniffles	0.840586	0.820725	0.830537	2595	2253	11880	HGSVC (Freeze 4)
HG002_DUPLEX	25	SV (DEL)	ONT	SVIM	0.861132	0.782378	0.819868	2213	1283	7956	HGSVC (Freeze 4)
HG002_DUPLEX	25	SV (INS)	ONT	SVIM	0.851765	0.786797	0.817993	3262	2095	12038	HGSVC (Freeze 4)
HG002_DUPLEX	25	SV (DEL)	ONT	Delly	0.81643	0.809856	0.81313	1771	1696	7543	HGSVC (Freeze 4)
HG002_DUPLEX	25	SV (INS)	ONT	Delly	0.76615	0.8464	0.804278	1965	3305	10828	HGSVC (Freeze 4)
HG002_DUPLEX	30	SV (DEL)	ONT	cuteSV	0.84836	0.715603	0.776347	3115	1401	7838	HGSVC (Freeze 4)
HG002_DUPLEX	30	SV (INS)	ONT	cuteSV	0.831883	0.781611	0.805964	3285	2376	11757	HGSVC (Freeze 4)
HG002_DUPLEX	30	SV (DEL)	ONT	Sniffles	0.858318	0.775171	0.814628	2300	1309	7930	HGSVC (Freeze 4)
HG002_DUPLEX	30	SV (INS)	ONT	Sniffles	0.842213	0.824879	0.833456	2527	2230	11903	HGSVC (Freeze 4)
HG002_DUPLEX	30	SV (DEL)	ONT	SVIM	0.863513	0.782771	0.821162	2214	1261	7978	HGSVC (Freeze 4)
HG002_DUPLEX	30	SV (INS)	ONT	SVIM	0.862591	0.783433	0.821109	3370	1942	12191	HGSVC (Freeze 4)
HG002_DUPLEX	30	SV (DEL)	ONT	Delly	0.816214	0.801382	0.80873	1869	1698	7541	HGSVC (Freeze 4)
HG002_DUPLEX	30	SV (INS)	ONT	Delly	0.766999	0.84005	0.801864	2064	3293	10840	HGSVC (Freeze 4)
