# Supplementary material for: Whole-genome long-read sequencing downsampling and its effect on variant-calling precision and recall
Source: Genome Res. 2023 Dec;33(12):2029–40. doi: 10.1101/gr.278070.123 (PMC10760522; doi:10.1101/gr.278070.123)
Supplement: Supplement 8 [file Supplemental_Table_S6.xlsx]

## Sheet: S6
S6 - SNV (assembly-based)
SAMPLE	COVERAGE	SVTYPE	TECH	METRIC.Recall	METRIC.Precision	METRIC.F1_Score	CALLER	Filter	Genotype	QQ.Field	QQ	METRIC.Frac_NA	FP.gt	FP.al	Subset.Size	Subset.IS_CONF.Size	Subset.Level	TRUTH.TOTAL	TRUTH.TOTAL.ti	TRUTH.TOTAL.tv	TRUTH.TOTAL.het	TRUTH.TOTAL.homalt	TRUTH.TOTAL.TiTv_ratio	TRUTH.TOTAL.het_hom_ratio	TRUTH.TP	TRUTH.TP.ti	TRUTH.TP.tv	TRUTH.TP.het	TRUTH.TP.homalt	TRUTH.TP.TiTv_ratio	TRUTH.TP.het_hom_ratio	TRUTH.FN	TRUTH.FN.ti	TRUTH.FN.tv	TRUTH.FN.het	TRUTH.FN.homalt	TRUTH.FN.TiTv_ratio	TRUTH.FN.het_hom_ratio	QUERY.TOTAL	QUERY.TOTAL.ti	QUERY.TOTAL.tv	QUERY.TOTAL.het	QUERY.TOTAL.homalt	QUERY.TOTAL.TiTv_ratio	QUERY.TOTAL.het_hom_ratio	QUERY.TP	QUERY.TP.ti	QUERY.TP.tv	QUERY.TP.het
HG002	5	SNV	ONT	0.471735	0.199041	0.279958	pav-flyehap_ont	ALL	*	QUAL	*	0.110382	665134	1123084	2809091522	2546949881	0	3365115	2280133	1085711	2060752	1303287	2.10013	1.5812	1587444	1080712	506885	476564	1110655	2.13207	0.429084	1777671	1199421	578826	1584188	192632	2.07216	8.22391	8967093	6245069	2692940	3192397	5742366	2.31905	0.555938	1587803	1080857	507099	476691
HG002	5	SNV	ONT	0.471735	0.199041	0.279958	pav-flyehap_ont	PASS	*	QUAL	*	0.110382	665134	1123084	2809091522	2546949881	0	3365115	2280133	1085711	2060752	1303287	2.10013	1.5812	1587444	1080712	506885	476564	1110655	2.13207	0.429084	1777671	1199421	578826	1584188	192632	2.07216	8.22391	8967093	6245069	2692940	3192397	5742366	2.31905	0.555938	1587803	1080857	507099	476691
HG002	8	SNV	ONT	0.735555	0.401168	0.519178	pav-flyehap_ont	ALL	*	QUAL	*	0.160483	417157	448762	2809091522	2546949881	0	3365115	2280133	1085711	2060752	1303287	2.10013	1.5812	2475228	1684641	791010	1219014	1255583	2.12973	0.970875	889887	595492	294701	841738	47704	2.02067	17.645	7351459	5077525	2233421	4607425	2713971	2.27343	1.69767	2475875	1684866	791432	1219404
HG002	8	SNV	ONT	0.735555	0.401168	0.519178	pav-flyehap_ont	PASS	*	QUAL	*	0.160483	417157	448762	2809091522	2546949881	0	3365115	2280133	1085711	2060752	1303287	2.10013	1.5812	2475228	1684641	791010	1219014	1255583	2.12973	0.970875	889887	595492	294701	841738	47704	2.02067	17.645	7351459	5077525	2233421	4607425	2713971	2.27343	1.69767	2475875	1684866	791432	1219404
HG002	10	SNV	ONT	0.838555	0.519679	0.641685	pav-flyehap_ont	ALL	*	QUAL	*	0.172951	253553	303548	2809091522	2546949881	0	3365115	2280133	1085711	2060752	1303287	2.10013	1.5812	2821835	1918776	903599	1559795	1261239	2.12348	1.23672	543280	361357	182112	500957	42048	1.98426	11.9139	6567484	4521112	2018305	4383955	2144007	2.24005	2.04475	2822703	1919133	904110	1560396
HG002	10	SNV	ONT	0.838555	0.519679	0.641685	pav-flyehap_ont	PASS	*	QUAL	*	0.172951	253553	303548	2809091522	2546949881	0	3365115	2280133	1085711	2060752	1303287	2.10013	1.5812	2821835	1918776	903599	1559795	1261239	2.12348	1.23672	543280	361357	182112	500957	42048	1.98426	11.9139	6567484	4521112	2018305	4383955	2144007	2.24005	2.04475	2822703	1919133	904110	1560396
HG002	12	SNV	ONT	0.8925	0.515444	0.653483	pav-flyehap_ont	ALL	*	QUAL	*	0.192234	148362	207092	2809091522	2546949881	0	3365115	2280133	1085711	2060752	1303287	2.10013	1.5812	3003366	2042598	961364	1754898	1247577	2.12469	1.40665	361749	237535	124347	305854	55710	1.91026	5.49011	7216173	4470574	2742651	4231278	2901529	1.63002	1.45829	3004515	2043048	962063	1755712
HG002	12	SNV	ONT	0.8925	0.515444	0.653483	pav-flyehap_ont	PASS	*	QUAL	*	0.192234	148362	207092	2809091522	2546949881	0	3365115	2280133	1085711	2060752	1303287	2.10013	1.5812	3003366	2042598	961364	1754898	1247577	2.12469	1.40665	361749	237535	124347	305854	55710	1.91026	5.49011	7216173	4470574	2742651	4231278	2901529	1.63002	1.45829	3004515	2043048	962063	1755712
HG002	15	SNV	ONT	0.873073	0.738033	0.799894	pav-flyehap_ont	ALL	*	QUAL	*	0.219644	74018	111173	2809091522	2546949881	0	3365115	2280133	1085711	2060752	1303287	2.10013	1.5812	2937991	1999202	939377	1783036	1154072	2.12822	1.545	427124	280931	146334	277716	149215	1.91979	1.86118	5103508	3362593	1708958	3371326	1688719	1.96763	1.99638	2939256	1999712	940132	1783994
HG002	15	SNV	ONT	0.873073	0.738033	0.799894	pav-flyehap_ont	PASS	*	QUAL	*	0.219644	74018	111173	2809091522	2546949881	0	3365115	2280133	1085711	2060752	1303287	2.10013	1.5812	2937991	1999202	939377	1783036	1154072	2.12822	1.545	427124	280931	146334	277716	149215	1.91979	1.86118	5103508	3362593	1708958	3371326	1688719	1.96763	1.99638	2939256	1999712	940132	1783994
HG002	17	SNV	ONT	0.960594	0.771055	0.855451	pav-flyehap_ont	ALL	*	QUAL	*	0.208529	48401	84526	2809091522	2546949881	0	3365115	2280133	1085711	2060752	1303287	2.10013	1.5812	3232510	2196985	1036204	1972294	1259215	2.12022	1.56629	132605	83148	49507	88458	44072	1.67952	2.00712	5299433	3405390	1850919	3304906	1975228	1.83984	1.67318	3234073	2197643	1037109	1973490
HG002	17	SNV	ONT	0.960594	0.771055	0.855451	pav-flyehap_ont	PASS	*	QUAL	*	0.208529	48401	84526	2809091522	2546949881	0	3365115	2280133	1085711	2060752	1303287	2.10013	1.5812	3232510	2196985	1036204	1972294	1259215	2.12022	1.56629	132605	83148	49507	88458	44072	1.67952	2.00712	5299433	3405390	1850919	3304906	1975228	1.83984	1.67318	3234073	2197643	1037109	1973490
HG002	20	SNV	ONT	0.964101	0.822106	0.88746	pav-flyehap_ont	ALL	*	QUAL	*	0.207404	52901	54916	2809091522	2546949881	0	3365115	2280133	1085711	2060752	1303287	2.10013	1.5812	3244311	2204914	1040075	1995368	1247943	2.11996	1.59893	120804	75219	45636	65384	55344	1.64824	1.18141	4981668	3183436	1762040	3226233	1717347	1.80668	1.87861	3246044	2205628	1041094	1996683
HG002	20	SNV	ONT	0.964101	0.822106	0.88746	pav-flyehap_ont	PASS	*	QUAL	*	0.207404	52901	54916	2809091522	2546949881	0	3365115	2280133	1085711	2060752	1303287	2.10013	1.5812	3244311	2204914	1040075	1995368	1247943	2.11996	1.59893	120804	75219	45636	65384	55344	1.64824	1.18141	4981668	3183436	1762040	3226233	1717347	1.80668	1.87861	3246044	2205628	1041094	1996683
HG002	25	SNV	ONT	0.955	0.873537	0.912454	pav-flyehap_ont	ALL	*	QUAL	*	0.210941	67355	34944	2809091522	2546949881	0	3365115	2280133	1085711	2060752	1303287	2.10013	1.5812	3213685	2184521	1029825	1986501	1226199	2.12125	1.62005	151430	95612	55886	74251	77088	1.71084	0.963198	4665082	2978430	1643156	2997519	1641372	1.81263	1.82623	3215512	2185255	1030918	1987886
HG002	25	SNV	ONT	0.955	0.873537	0.912454	pav-flyehap_ont	PASS	*	QUAL	*	0.210941	67355	34944	2809091522	2546949881	0	3365115	2280133	1085711	2060752	1303287	2.10013	1.5812	3213685	2184521	1029825	1986501	1226199	2.12125	1.62005	151430	95612	55886	74251	77088	1.71084	0.963198	4665082	2978430	1643156	2997519	1641372	1.81263	1.82623	3215512	2185255	1030918	1987886
HG002	30	SNV	ONT	0.979527	0.931416	0.954866	pav-flyehap_ont	ALL	*	QUAL	*	0.220842	18637	28184	2809091522	2546949881	0	3365115	2280133	1085711	2060752	1303287	2.10013	1.5812	3296220	2239300	1057604	2024875	1270329	2.11733	1.59398	68895	40833	28107	35877	32958	1.45277	1.08857	4544727	2912862	1588096	2786200	1731350	1.83419	1.60926	3298201	2240090	1058795	2026427
HG002	30	SNV	ONT	0.979527	0.931416	0.954866	pav-flyehap_ont	PASS	*	QUAL	*	0.220842	18637	28184	2809091522	2546949881	0	3365115	2280133	1085711	2060752	1303287	2.10013	1.5812	3296220	2239300	1057604	2024875	1270329	2.11733	1.59398	68895	40833	28107	35877	32958	1.45277	1.08857	4544727	2912862	1588096	2786200	1731350	1.83419	1.60926	3298201	2240090	1058795	2026427
HG00733	5	SNV	ONT	0.446536	0.141276	0.214643	pav-flyehap_ont	ALL	*	QUAL	*	0.18178	730224	1772105	3031399176	2546864659	0	3361477	2276447	1085030	2049176	1309841	2.09805	1.56445	1501021	1025047	475974	358274	1142747	2.15358	0.31352	1860456	1251400	609056	1690902	167094	2.05466	10.1195	12984857	8749221	4213076	4418548	8470932	2.07668	0.521613	1500984	1025032	475952	358244
HG00733	5	SNV	ONT	0.446536	0.141276	0.214643	pav-flyehap_ont	PASS	*	QUAL	*	0.18178	730224	1772105	3031399176	2546864659	0	3361477	2276447	1085030	2049176	1309841	2.09805	1.56445	1501021	1025047	475974	358274	1142747	2.15358	0.31352	1860456	1251400	609056	1690902	167094	2.05466	10.1195	12984857	8749221	4213076	4418548	8470932	2.07668	0.521613	1500984	1025032	475952	358244
HG00733	8	SNV	ONT	0.658141	0.229479	0.340302	pav-flyehap_ont	ALL	*	QUAL	*	0.193557	535986	848836	3031399176	2546864659	0	3361994	2276823	1085171	2049176	1309841	2.09812	1.56445	2212667	1508693	703974	958830	1253837	2.14311	0.764717	1149327	768130	381197	1090346	56004	2.01505	19.4691	11955914	7665224	4308179	6600741	5170222	1.77923	1.27668	2212580	1508658	703925	958751
HG00733	8	SNV	ONT	0.658141	0.229479	0.340302	pav-flyehap_ont	PASS	*	QUAL	*	0.193557	535986	848836	3031399176	2546864659	0	3361994	2276823	1085171	2049176	1309841	2.09812	1.56445	2212667	1508693	703974	958830	1253837	2.14311	0.764717	1149327	768130	381197	1090346	56004	2.01505	19.4691	11955914	7665224	4308179	6600741	5170222	1.77923	1.27668	2212580	1508658	703925	958751
HG00733	10	SNV	ONT	0.760118	0.300378	0.430597	pav-flyehap_ont	ALL	*	QUAL	*	0.206085	380041	638364	3031399176	2546864659	0	3361921	2276770	1085151	2049176	1309841	2.09811	1.56445	2555457	1741223	814234	1315093	1240364	2.13848	1.06025	806464	535547	270917	734083	69477	1.97679	10.5658	10715361	6873719	3820883	6583996	3995803	1.79899	1.64773	2555346	1741191	814158	1314992
HG00733	10	SNV	ONT	0.760118	0.300378	0.430597	pav-flyehap_ont	PASS	*	QUAL	*	0.206085	380041	638364	3031399176	2546864659	0	3361921	2276770	1085151	2049176	1309841	2.09811	1.56445	2555457	1741223	814234	1315093	1240364	2.13848	1.06025	806464	535547	270917	734083	69477	1.97679	10.5658	10715361	6873719	3820883	6583996	3995803	1.79899	1.64773	2555346	1741191	814158	1314992
HG00733	12	SNV	ONT	0.839238	0.354121	0.498076	pav-flyehap_ont	ALL	*	QUAL	*	0.241473	252846	489589	3031399176	2546864659	0	3362321	2277030	1085291	2049176	1309841	2.09808	1.56445	2821789	1920765	901024	1572883	1248906	2.13176	1.25941	540532	356265	184267	476293	60935	1.93342	7.81641	10504664	6496378	4040566	7416815	2874573	1.60779	2.58014	2821662	1920727	900942	1572756
HG00733	12	SNV	ONT	0.839238	0.354121	0.498076	pav-flyehap_ont	PASS	*	QUAL	*	0.241473	252846	489589	3031399176	2546864659	0	3362321	2277030	1085291	2049176	1309841	2.09808	1.56445	2821789	1920765	901024	1572883	1248906	2.13176	1.25941	540532	356265	184267	476293	60935	1.93342	7.81641	10504664	6496378	4040566	7416815	2874573	1.60779	2.58014	2821662	1920727	900942	1572756
HG00733	15	SNV	ONT	0.890754	0.527665	0.662738	pav-flyehap_ont	ALL	*	QUAL	*	0.278573	165113	309109	3031399176	2546864659	0	3362243	2276991	1085252	2049176	1309841	2.09812	1.56445	2994932	2037827	957105	1778869	1216063	2.12916	1.46281	367311	239164	128147	270307	93778	1.86633	2.88241	7867185	5106252	2772591	5321468	2366242	1.84169	2.24891	2994814	2037812	957010	1778757
HG00733	15	SNV	ONT	0.890754	0.527665	0.662738	pav-flyehap_ont	PASS	*	QUAL	*	0.278573	165113	309109	3031399176	2546864659	0	3362243	2276991	1085252	2049176	1309841	2.09812	1.56445	2994932	2037827	957105	1778869	1216063	2.12916	1.46281	367311	239164	128147	270307	93778	1.86633	2.88241	7867185	5106252	2772591	5321468	2366242	1.84169	2.24891	2994814	2037812	957010	1778757
HG00733	17	SNV	ONT	0.937252	0.48835	0.642124	pav-flyehap_ont	ALL	*	QUAL	*	0.296523	91842	233007	3031399176	2546864659	0	3362438	2277119	1085319	2049176	1309841	2.09811	1.56445	3151453	2142707	1008746	1890575	1260878	2.12413	1.49941	210985	134412	76573	158601	48963	1.75534	3.2392	9172988	5278730	3871064	4770542	4279774	1.36364	1.11467	3151312	2142663	1008662	1890436
HG00733	17	SNV	ONT	0.937252	0.48835	0.642124	pav-flyehap_ont	PASS	*	QUAL	*	0.296523	91842	233007	3031399176	2546864659	0	3362438	2277119	1085319	2049176	1309841	2.09811	1.56445	3151453	2142707	1008746	1890575	1260878	2.12413	1.49941	210985	134412	76573	158601	48963	1.75534	3.2392	9172988	5278730	3871064	4770542	4279774	1.36364	1.11467	3151312	2142663	1008662	1890436
HG00733	20	SNV	ONT	0.948446	0.547461	0.69421	pav-flyehap_ont	ALL	*	QUAL	*	0.411464	62817	146200	3031399176	2546864659	0	3362559	2277182	1085377	2049176	1309841	2.09806	1.56445	3189204	2167491	1021713	1939318	1249886	2.12143	1.5516	173355	109691	63664	109858	59955	1.72297	1.83234	9897710	5236718	4707402	5434244	4214793	1.11244	1.28933	3189045	2167455	1021609	1939159
HG00733	20	SNV	ONT	0.948446	0.547461	0.69421	pav-flyehap_ont	PASS	*	QUAL	*	0.411464	62817	146200	3031399176	2546864659	0	3362559	2277182	1085377	2049176	1309841	2.09806	1.56445	3189204	2167491	1021713	1939318	1249886	2.12143	1.5516	173355	109691	63664	109858	59955	1.72297	1.83234	9897710	5236718	4707402	5434244	4214793	1.11244	1.28933	3189045	2167455	1021609	1939159
HG00733	25	SNV	ONT	0.97247	0.607974	0.748191	pav-flyehap_ont	ALL	*	QUAL	*	0.27629	37649	76566	3031399176	2546864659	0	3362649	2277237	1085412	2049176	1309841	2.09804	1.56445	3270076	2222705	1047371	1998402	1271674	2.12218	1.57147	92573	54532	38041	50774	38167	1.43351	1.33031	7431805	4154201	3247112	3674671	3626451	1.27935	1.0133	3269973	2222700	1047294	1998294
HG00733	25	SNV	ONT	0.97247	0.607974	0.748191	pav-flyehap_ont	PASS	*	QUAL	*	0.27629	37649	76566	3031399176	2546864659	0	3362649	2277237	1085412	2049176	1309841	2.09804	1.56445	3270076	2222705	1047371	1998402	1271674	2.12218	1.57147	92573	54532	38041	50774	38167	1.43351	1.33031	7431805	4154201	3247112	3674671	3626451	1.27935	1.0133	3269973	2222700	1047294	1998294
HG00733	30	SNV	ONT	0.920129	0.621729	0.742054	pav-flyehap_ont	ALL	*	QUAL	*	0.288442	77946	44647	3031399176	2546864659	0	3362583	2277219	1085364	2049176	1309841	2.09812	1.56445	3094011	2101616	992395	1911493	1182518	2.11772	1.61646	268572	175603	92969	137683	127323	1.88883	1.08137	6993486	3834347	3141807	3354453	3500877	1.22043	0.958175	3093892	2101595	992317	1911357
HG00733	30	SNV	ONT	0.920129	0.621729	0.742054	pav-flyehap_ont	PASS	*	QUAL	*	0.288442	77946	44647	3031399176	2546864659	0	3362583	2277219	1085364	2049176	1309841	2.09812	1.56445	3094011	2101616	992395	1911493	1182518	2.11772	1.61646	268572	175603	92969	137683	127323	1.88883	1.08137	6993486	3834347	3141807	3354453	3500877	1.22043	0.958175	3093892	2101595	992317	1911357
HG002	5	SNV	UL-ONT	0.505351	0.126929	0.202897	pav-flyehap_ulont	ALL	*	QUAL	*	0.112555	724710	1946690	2809091522	2546949881	0	3365115	2280133	1085711	2060752	1303287	2.10013	1.5812	1700565	1157458	543235	491724	1208632	2.13068	0.406843	1664550	1122675	542476	1569028	94655	2.06954	16.5763	15099468	9708225	5374886	5441492	9572917	1.80622	0.568426	1700845	1157559	543414	491822
HG002	5	SNV	UL-ONT	0.505351	0.126929	0.202897	pav-flyehap_ulont	PASS	*	QUAL	*	0.112555	724710	1946690	2809091522	2546949881	0	3365115	2280133	1085711	2060752	1303287	2.10013	1.5812	1700565	1157458	543235	491724	1208632	2.13068	0.406843	1664550	1122675	542476	1569028	94655	2.06954	16.5763	15099468	9708225	5374886	5441492	9572917	1.80622	0.568426	1700845	1157559	543414	491822
HG002	8	SNV	UL-ONT	0.713539	0.279376	0.401536	pav-flyehap_ulont	ALL	*	QUAL	*	0.154301	450656	846779	2809091522	2546949881	0	3365115	2280133	1085711	2060752	1303287	2.10013	1.5812	2401142	1633679	767851	1150869	1249709	2.1276	0.92091	963973	646454	317860	909883	53578	2.03377	16.9824	10165037	6988645	3160935	6726192	3369786	2.21094	1.99603	2401671	1633882	768177	1151180
HG002	8	SNV	UL-ONT	0.713539	0.279376	0.401536	pav-flyehap_ulont	PASS	*	QUAL	*	0.154301	450656	846779	2809091522	2546949881	0	3365115	2280133	1085711	2060752	1303287	2.10013	1.5812	2401142	1633679	767851	1150869	1249709	2.1276	0.92091	963973	646454	317860	909883	53578	2.03377	16.9824	10165037	6988645	3160935	6726192	3369786	2.21094	1.99603	2401671	1633882	768177	1151180
HG002	10	SNV	UL-ONT	0.801581	0.344754	0.482142	pav-flyehap_ulont	ALL	*	QUAL	*	0.158595	277291	575957	2809091522	2546949881	0	3365115	2280133	1085711	2060752	1303287	2.10013	1.5812	2697412	1834754	863126	1471713	1224992	2.12571	1.20141	667703	445379	222585	589039	78295	2.00094	7.52333	9301138	6181774	3115908	6145068	3061543	1.98394	2.00718	2698053	1835015	863506	1472121
HG002	10	SNV	UL-ONT	0.801581	0.344754	0.482142	pav-flyehap_ulont	PASS	*	QUAL	*	0.158595	277291	575957	2809091522	2546949881	0	3365115	2280133	1085711	2060752	1303287	2.10013	1.5812	2697412	1834754	863126	1471713	1224992	2.12571	1.20141	667703	445379	222585	589039	78295	2.00094	7.52333	9301138	6181774	3115908	6145068	3061543	1.98394	2.00718	2698053	1835015	863506	1472121
HG002	12	SNV	UL-ONT	0.879138	0.475012	0.616773	pav-flyehap_ulont	ALL	*	QUAL	*	0.201205	170948	415916	2809091522	2546949881	0	3365115	2280133	1085711	2060752	1303287	2.10013	1.5812	2958399	2011437	947523	1716245	1241308	2.12284	1.38261	406716	268696	138188	344507	61979	1.94442	5.55845	7799212	5296583	2483097	5532908	2184671	2.13306	2.5326	2959315	2011808	948068	1716910
HG002	12	SNV	UL-ONT	0.879138	0.475012	0.616773	pav-flyehap_ulont	PASS	*	QUAL	*	0.201205	170948	415916	2809091522	2546949881	0	3365115	2280133	1085711	2060752	1303287	2.10013	1.5812	2958399	2011437	947523	1716245	1241308	2.12284	1.38261	406716	268696	138188	344507	61979	1.94442	5.55845	7799212	5296583	2483097	5532908	2184671	2.13306	2.5326	2959315	2011808	948068	1716910
HG002	15	SNV	UL-ONT	0.921698	0.575526	0.708593	pav-flyehap_ulont	ALL	*	QUAL	*	0.28062	92147	253660	2809091522	2546949881	0	3365115	2280133	1085711	2060752	1303287	2.10013	1.5812	3101620	2107861	994386	1865448	1235242	2.11976	1.51019	263495	172272	91325	195304	68045	1.88636	2.87022	7494050	4714278	2778045	4806141	2594337	1.69698	1.85255	3102705	2108297	995035	1866284
HG002	15	SNV	UL-ONT	0.921698	0.575526	0.708593	pav-flyehap_ulont	PASS	*	QUAL	*	0.28062	92147	253660	2809091522	2546949881	0	3365115	2280133	1085711	2060752	1303287	2.10013	1.5812	3101620	2107861	994386	1865448	1235242	2.11976	1.51019	263495	172272	91325	195304	68045	1.88636	2.87022	7494050	4714278	2778045	4806141	2594337	1.69698	1.85255	3102705	2108297	995035	1866284
HG002	17	SNV	UL-ONT	0.901875	0.609162	0.727167	pav-flyehap_ulont	ALL	*	QUAL	*	0.236636	92135	156126	2809091522	2546949881	0	3365115	2280133	1085711	2060752	1303287	2.10013	1.5812	3034913	2062749	972795	1856023	1177958	2.12044	1.57563	330202	217384	112916	204729	125329	1.92518	1.63353	6528967	4035226	2467204	4526967	1936879	1.63555	2.33725	3036053	2063214	973470	1856890
HG002	17	SNV	UL-ONT	0.901875	0.609162	0.727167	pav-flyehap_ulont	PASS	*	QUAL	*	0.236636	92135	156126	2809091522	2546949881	0	3365115	2280133	1085711	2060752	1303287	2.10013	1.5812	3034913	2062749	972795	1856023	1177958	2.12044	1.57563	330202	217384	112916	204729	125329	1.92518	1.63353	6528967	4035226	2467204	4526967	1936879	1.63555	2.33725	3036053	2063214	973470	1856890
HG002	20	SNV	UL-ONT	0.927282	0.738918	0.822453	pav-flyehap_ulont	ALL	*	QUAL	*	0.382559	70788	94789	2809091522	2546949881	0	3365115	2280133	1085711	2060752	1303287	2.10013	1.5812	3120412	2120495	1000553	1922660	1196803	2.11932	1.6065	244703	159638	85158	138092	106484	1.87461	1.29683	6842485	3972767	2918931	3969536	2699686	1.36103	1.47037	3121802	2121055	1001383	1923753
HG002	20	SNV	UL-ONT	0.927282	0.738918	0.822453	pav-flyehap_ulont	PASS	*	QUAL	*	0.382559	70788	94789	2809091522	2546949881	0	3365115	2280133	1085711	2060752	1303287	2.10013	1.5812	3120412	2120495	1000553	1922660	1196803	2.11932	1.6065	244703	159638	85158	138092	106484	1.87461	1.29683	6842485	3972767	2918931	3969536	2699686	1.36103	1.47037	3121802	2121055	1001383	1923753
HG002	25	SNV	UL-ONT	0.930707	0.792727	0.856194	pav-flyehap_ulont	ALL	*	QUAL	*	0.291935	47950	50546	2809091522	2546949881	0	3365115	2280133	1085711	2060752	1303287	2.10013	1.5812	3131935	2127010	1005571	1933605	1197376	2.11523	1.61487	233180	153123	80140	127147	105911	1.91069	1.20051	5582667	3365156	2266813	3244876	2179068	1.48453	1.48911	3133564	2127660	1006550	1934860
HG002	25	SNV	UL-ONT	0.930707	0.792727	0.856194	pav-flyehap_ulont	PASS	*	QUAL	*	0.291935	47950	50546	2809091522	2546949881	0	3365115	2280133	1085711	2060752	1303287	2.10013	1.5812	3131935	2127010	1005571	1933605	1197376	2.11523	1.61487	233180	153123	80140	127147	105911	1.91069	1.20051	5582667	3365156	2266813	3244876	2179068	1.48453	1.48911	3133564	2127660	1006550	1934860
HG002	30	SNV	UL-ONT	0.929967	0.762763	0.838107	pav-flyehap_ulont	ALL	*	QUAL	*	0.339636	63827	33745	2809091522	2546949881	0	3365115	2280133	1085711	2060752	1303287	2.10013	1.5812	3129445	2125080	1005007	1935557	1192940	2.11449	1.62251	235670	155053	80704	125195	110347	1.92126	1.13456	6216317	3488445	2746302	3136316	2951777	1.27023	1.06252	3131165	2125753	1006054	1936880
HG002	30	SNV	UL-ONT	0.929967	0.762763	0.838107	pav-flyehap_ulont	PASS	*	QUAL	*	0.339636	63827	33745	2809091522	2546949881	0	3365115	2280133	1085711	2060752	1303287	2.10013	1.5812	3129445	2125080	1005007	1935557	1192940	2.11449	1.62251	235670	155053	80704	125195	110347	1.92126	1.13456	6216317	3488445	2746302	3136316	2951777	1.27023	1.06252	3131165	2125753	1006054	1936880
HG00733	5	SNV	UL-ONT	0.497277	0.148951	0.229237	pav-flyehap_ulont	ALL	*	QUAL	*	0.186418	726025	1573735	3031399176	2546864659	0	3361939	2276770	1085169	2049176	1309841	2.09808	1.56445	1671814	1136775	535039	465556	1206258	2.12466	0.385951	1690125	1139995	550130	1583620	103583	2.07223	15.2884	13795130	9042596	4728433	4512966	9168568	1.91239	0.492221	1671745	1136744	535001	465490
HG00733	5	SNV	UL-ONT	0.497277	0.148951	0.229237	pav-flyehap_ulont	PASS	*	QUAL	*	0.186418	726025	1573735	3031399176	2546864659	0	3361939	2276770	1085169	2049176	1309841	2.09808	1.56445	1671814	1136775	535039	465556	1206258	2.12466	0.385951	1690125	1139995	550130	1583620	103583	2.07223	15.2884	13795130	9042596	4728433	4512966	9168568	1.91239	0.492221	1671745	1136744	535001	465490
HG00733	8	SNV	UL-ONT	0.722775	0.254887	0.376871	pav-flyehap_ulont	ALL	*	QUAL	*	0.300976	433407	676040	3031399176	2546864659	0	3362238	2276967	1085271	2049176	1309841	2.09806	1.56445	2430140	1651677	778463	1171466	1258674	2.12172	0.930714	932098	625290	306808	877710	51167	2.03805	17.1538	13638937	8030573	5670224	6464490	6909726	1.41627	0.935564	2430082	1651663	778422	1171421
HG00733	8	SNV	UL-ONT	0.722775	0.254887	0.376871	pav-flyehap_ulont	PASS	*	QUAL	*	0.300976	433407	676040	3031399176	2546864659	0	3362238	2276967	1085271	2049176	1309841	2.09806	1.56445	2430140	1651677	778463	1171466	1258674	2.12172	0.930714	932098	625290	306808	877710	51167	2.03805	17.1538	13638937	8030573	5670224	6464490	6909726	1.41627	0.935564	2430082	1651663	778422	1171421
HG00733	10	SNV	UL-ONT	0.800245	0.342161	0.479362	pav-flyehap_ulont	ALL	*	QUAL	*	0.297282	305406	458053	3031399176	2546864659	0	3362416	2277091	1085325	2049176	1309841	2.09807	1.56445	2690758	1828523	862235	1477214	1213544	2.12068	1.21727	671658	448568	223090	571962	96297	2.0107	5.93956	11190456	6731399	4459196	6112507	4896254	1.50955	1.2484	2690665	1828524	862148	1477125
HG00733	10	SNV	UL-ONT	0.800245	0.342161	0.479362	pav-flyehap_ulont	PASS	*	QUAL	*	0.297282	305406	458053	3031399176	2546864659	0	3362416	2277091	1085325	2049176	1309841	2.09807	1.56445	2690758	1828523	862235	1477214	1213544	2.12068	1.21727	671658	448568	223090	571962	96297	2.0107	5.93956	11190456	6731399	4459196	6112507	4896254	1.50955	1.2484	2690665	1828524	862148	1477125
HG00733	12	SNV	UL-ONT	0.871328	0.410339	0.557929	pav-flyehap_ulont	ALL	*	QUAL	*	0.329409	159562	330534	3031399176	2546864659	0	3362638	2277231	1085407	2049176	1309841	2.09804	1.56445	2929960	1989424	940536	1690838	1239122	2.1152	1.36455	432678	287807	144871	358338	70719	1.98664	5.06707	10647395	6183303	4515600	5689264	4709003	1.36932	1.20817	2929838	1989402	940453	1690717
HG00733	12	SNV	UL-ONT	0.871328	0.410339	0.557929	pav-flyehap_ulont	PASS	*	QUAL	*	0.329409	159562	330534	3031399176	2546864659	0	3362638	2277231	1085407	2049176	1309841	2.09804	1.56445	2929960	1989424	940536	1690838	1239122	2.1152	1.36455	432678	287807	144871	358338	70719	1.98664	5.06707	10647395	6183303	4515600	5689264	4709003	1.36932	1.20817	2929838	1989402	940453	1690717
HG00733	15	SNV	UL-ONT	0.933355	0.497438	0.648992	pav-flyehap_ulont	ALL	*	QUAL	*	0.288039	106272	199649	3031399176	2546864659	0	3362840	2277388	1085452	2049176	1309841	2.0981	1.56445	3138722	2132145	1006577	1895041	1243681	2.11821	1.52374	224118	145243	78875	154135	66160	1.84143	2.32973	8862237	5177882	3696124	4816595	3842052	1.4009	1.25365	3138622	2132134	1006505	1894942
HG00733	15	SNV	UL-ONT	0.933355	0.497438	0.648992	pav-flyehap_ulont	PASS	*	QUAL	*	0.288039	106272	199649	3031399176	2546864659	0	3362840	2277388	1085452	2049176	1309841	2.0981	1.56445	3138722	2132145	1006577	1895041	1243681	2.11821	1.52374	224118	145243	78875	154135	66160	1.84143	2.32973	8862237	5177882	3696124	4816595	3842052	1.4009	1.25365	3138622	2132134	1006505	1894942
HG00733	17	SNV	UL-ONT	0.912113	0.64925	0.758554	pav-flyehap_ulont	ALL	*	QUAL	*	0.419815	67263	134397	3031399176	2546864659	0	3362881	2277427	1085454	2049176	1309841	2.09813	1.56445	3067328	2082900	984428	1866914	1200414	2.11585	1.55523	295553	194527	101026	182262	109427	1.92551	1.6656	8142624	4643664	3526643	4307592	3620700	1.31674	1.18971	3067203	2082883	984335	1866796
HG00733	17	SNV	UL-ONT	0.912113	0.64925	0.758554	pav-flyehap_ulont	PASS	*	QUAL	*	0.419815	67263	134397	3031399176	2546864659	0	3362881	2277427	1085454	2049176	1309841	2.09813	1.56445	3067328	2082900	984428	1866914	1200414	2.11585	1.55523	295553	194527	101026	182262	109427	1.92551	1.6656	8142624	4643664	3526643	4307592	3620700	1.31674	1.18971	3067203	2082883	984335	1866796
HG00733	20	SNV	UL-ONT	0.965494	0.588434	0.731217	pav-flyehap_ulont	ALL	*	QUAL	*	0.406269	38201	88351	3031399176	2546864659	0	3362912	2277447	1085465	2049176	1309841	2.09813	1.56445	3246871	2204627	1042244	1977386	1269485	2.11527	1.55763	116041	72820	43221	71790	40356	1.68483	1.77892	9293153	4876908	4434554	4140996	4933490	1.09975	0.839364	3246766	2204603	1042180	1977278
HG00733	20	SNV	UL-ONT	0.965494	0.588434	0.731217	pav-flyehap_ulont	PASS	*	QUAL	*	0.406269	38201	88351	3031399176	2546864659	0	3362912	2277447	1085465	2049176	1309841	2.09813	1.56445	3246871	2204627	1042244	1977386	1269485	2.11527	1.55763	116041	72820	43221	71790	40356	1.68483	1.77892	9293153	4876908	4434554	4140996	4933490	1.09975	0.839364	3246766	2204603	1042180	1977278
HG00733	25	SNV	UL-ONT	0.962916	0.758713	0.848705	pav-flyehap_ulont	ALL	*	QUAL	*	0.453932	43350	48304	3031399176	2546864659	0	3362962	2277464	1085498	2049176	1309841	2.09808	1.56445	3238251	2198688	1039563	1985052	1253199	2.11501	1.58399	124711	78776	45935	64124	56642	1.71495	1.13209	7815757	4193016	3640359	3680989	3924142	1.15181	0.938037	3238138	2198667	1039493	1984925
HG00733	25	SNV	UL-ONT	0.962916	0.758713	0.848705	pav-flyehap_ulont	PASS	*	QUAL	*	0.453932	43350	48304	3031399176	2546864659	0	3362962	2277464	1085498	2049176	1309841	2.09808	1.56445	3238251	2198688	1039563	1985052	1253199	2.11501	1.58399	124711	78776	45935	64124	56642	1.71495	1.13209	7815757	4193016	3640359	3680989	3924142	1.15181	0.938037	3238138	2198667	1039493	1984925
HG00733	30	SNV	UL-ONT	0.95905	0.643403	0.770139	pav-flyehap_ulont	ALL	*	QUAL	*	0.42531	48697	32387	3031399176	2546864659	0	3362914	2277454	1085460	2049176	1309841	2.09815	1.56445	3225204	2189005	1036199	1982121	1243083	2.11253	1.59452	137710	88449	49261	67055	66758	1.79552	1.00445	8722174	4426731	4354564	3680890	4763878	1.01657	0.772667	3225087	2188983	1036124	1981986
HG00733	30	SNV	UL-ONT	0.95905	0.643403	0.770139	pav-flyehap_ulont	PASS	*	QUAL	*	0.42531	48697	32387	3031399176	2546864659	0	3362914	2277454	1085460	2049176	1309841	2.09815	1.56445	3225204	2189005	1036199	1982121	1243083	2.11253	1.59452	137710	88449	49261	67055	66758	1.79552	1.00445	8722174	4426731	4354564	3680890	4763878	1.01657	0.772667	3225087	2188983	1036124	1981986
HG002	5	SNV	HiFi	0.402149	0.601738	0.482102	pav-hifiasm	ALL	*	QUAL	*	0.195439	697655	31684	2809091522	2546949881	0	3365115	2280133	1085711	2060752	1303287	2.10013	1.5812	1353276	915570	437828	764608	588488	2.09116	1.29928	2011839	1364563	647883	1296144	714799	2.10619	1.8133	2796904	1716553	1056055	1808209	987332	1.62544	1.83141	1354078	915850	438350	765141
HG002	5	SNV	HiFi	0.402149	0.601738	0.482102	pav-hifiasm	PASS	*	QUAL	*	0.195439	697655	31684	2809091522	2546949881	0	3365115	2280133	1085711	2060752	1303287	2.10013	1.5812	1353276	915570	437828	764608	588488	2.09116	1.29928	2011839	1364563	647883	1296144	714799	2.10619	1.8133	2796904	1716553	1056055	1808209	987332	1.62544	1.83141	1354078	915850	438350	765141
HG002	8	SNV	HiFi	0.684079	0.752973	0.716874	pav-hifiasm	ALL	*	QUAL	*	0.21938	551095	27038	2809091522	2546949881	0	3365115	2280133	1085711	2060752	1303287	2.10013	1.5812	2302003	1559655	742783	1497213	804146	2.09975	1.86187	1063112	720478	342928	563539	499141	2.10096	1.12902	3919807	2415894	1465034	2820122	1087295	1.64904	2.5937	2304006	1560375	744066	1498801
HG002	8	SNV	HiFi	0.684079	0.752973	0.716874	pav-hifiasm	PASS	*	QUAL	*	0.21938	551095	27038	2809091522	2546949881	0	3365115	2280133	1085711	2060752	1303287	2.10013	1.5812	2302003	1559655	742783	1497213	804146	2.09975	1.86187	1063112	720478	342928	563539	499141	2.10096	1.12902	3919807	2415894	1465034	2820122	1087295	1.64904	2.5937	2304006	1560375	744066	1498801
HG002	10	SNV	HiFi	0.493072	0.556999	0.52309	pav-hifiasm	ALL	*	QUAL	*	0.411057	676798	13161	2809091522	2546949881	0	3365115	2280133	1085711	2060752	1303287	2.10013	1.5812	1659245	1123516	535860	410093	1248954	2.09666	0.328349	1705870	1156617	549851	1650659	54333	2.10351	30.3804	5061291	2618564	2463367	1266042	3696010	1.063	0.342543	1660309	1123883	536557	410595
HG002	10	SNV	HiFi	0.493072	0.556999	0.52309	pav-hifiasm	PASS	*	QUAL	*	0.411057	676798	13161	2809091522	2546949881	0	3365115	2280133	1085711	2060752	1303287	2.10013	1.5812	1659245	1123516	535860	410093	1248954	2.09666	0.328349	1705870	1156617	549851	1650659	54333	2.10351	30.3804	5061291	2618564	2463367	1266042	3696010	1.063	0.342543	1660309	1123883	536557	410595
HG002	12	SNV	HiFi	0.894002	0.881003	0.887455	pav-hifiasm	ALL	*	QUAL	*	0.261086	214526	11893	2809091522	2546949881	0	3365115	2280133	1085711	2060752	1303287	2.10013	1.5812	3008421	2038032	971034	1900772	1106686	2.09883	1.71754	356694	242101	114677	159980	196601	2.11116	0.813729	4626254	2797012	1773913	3151845	1465836	1.57675	2.1502	3011624	2039213	973056	1903345
HG002	12	SNV	HiFi	0.894002	0.881003	0.887455	pav-hifiasm	PASS	*	QUAL	*	0.261086	214526	11893	2809091522	2546949881	0	3365115	2280133	1085711	2060752	1303287	2.10013	1.5812	3008421	2038032	971034	1900772	1106686	2.09883	1.71754	356694	242101	114677	159980	196601	2.11116	0.813729	4626254	2797012	1773913	3151845	1465836	1.57675	2.1502	3011624	2039213	973056	1903345
HG002	15	SNV	HiFi	0.949371	0.617302	0.748144	pav-hifiasm	ALL	*	QUAL	*	0.408981	99278	5549	2809091522	2546949881	0	3365115	2280133	1085711	2060752	1303287	2.10013	1.5812	3194743	2164819	1030613	1979148	1214572	2.10052	1.6295	170372	115314	55098	81604	88715	2.09289	0.919844	8766315	4184031	4544065	6425963	2316915	0.920768	2.7735	3198278	2166178	1032789	1982014
HG002	15	SNV	HiFi	0.949371	0.617302	0.748144	pav-hifiasm	PASS	*	QUAL	*	0.408981	99278	5549	2809091522	2546949881	0	3365115	2280133	1085711	2060752	1303287	2.10013	1.5812	3194743	2164819	1030613	1979148	1214572	2.10052	1.6295	170372	115314	55098	81604	88715	2.09289	0.919844	8766315	4184031	4544065	6425963	2316915	0.920768	2.7735	3198278	2166178	1032789	1982014
HG002	17	SNV	HiFi	0.970129	0.705988	0.817245	pav-hifiasm	ALL	*	QUAL	*	0.415461	62736	3281	2809091522	2546949881	0	3365115	2280133	1085711	2060752	1303287	2.10013	1.5812	3264597	2212127	1053180	2018386	1245163	2.10043	1.62098	100518	68006	32531	42366	58124	2.0905	0.72889	7919739	3938460	3985898	5891428	1930354	0.988099	3.05199	3268299	2213547	1055462	2021394
HG002	17	SNV	HiFi	0.970129	0.705988	0.817245	pav-hifiasm	PASS	*	QUAL	*	0.415461	62736	3281	2809091522	2546949881	0	3365115	2280133	1085711	2060752	1303287	2.10013	1.5812	3264597	2212127	1053180	2018386	1245163	2.10043	1.62098	100518	68006	32531	42366	58124	2.0905	0.72889	7919739	3938460	3985898	5891428	1930354	0.988099	3.05199	3268299	2213547	1055462	2021394
HG002	20	SNV	HiFi	0.978541	0.557821	0.710576	pav-hifiasm	ALL	*	QUAL	*	0.460006	44412	1689	2809091522	2546949881	0	3365115	2280133	1085711	2060752	1303287	2.10013	1.5812	3292903	2231068	1062530	2030860	1261011	2.09977	1.6105	72212	49065	23181	29892	42276	2.1166	0.707068	10944786	5057844	6142196	7542759	2929169	0.823459	2.57505	3296792	2232529	1064958	2034004
HG002	20	SNV	HiFi	0.978541	0.557821	0.710576	pav-hifiasm	PASS	*	QUAL	*	0.460006	44412	1689	2809091522	2546949881	0	3365115	2280133	1085711	2060752	1303287	2.10013	1.5812	3292903	2231068	1062530	2030860	1261011	2.09977	1.6105	72212	49065	23181	29892	42276	2.1166	0.707068	10944786	5057844	6142196	7542759	2929169	0.823459	2.57505	3296792	2232529	1064958	2034004
HG002	25	SNV	HiFi	0.930418	0.658826	0.771415	pav-hifiasm	ALL	*	QUAL	*	0.507141	109532	722	2809091522	2546949881	0	3365115	2280133	1085711	2060752	1303287	2.10013	1.5812	3130965	2122866	1008761	1946237	1183746	2.10443	1.64413	234150	157267	76950	114515	119541	2.04376	0.957956	9653416	4478010	5224366	5645280	3852726	0.857139	1.46527	3134546	2124220	1010988	1949163
HG002	25	SNV	HiFi	0.930418	0.658826	0.771415	pav-hifiasm	PASS	*	QUAL	*	0.507141	109532	722	2809091522	2546949881	0	3365115	2280133	1085711	2060752	1303287	2.10013	1.5812	3130965	2122866	1008761	1946237	1183746	2.10443	1.64413	234150	157267	76950	114515	119541	2.04376	0.957956	9653416	4478010	5224366	5645280	3852726	0.857139	1.46527	3134546	2124220	1010988	1949163
HG002	30	SNV	HiFi	0.899889	0.461303	0.609939	pav-hifiasm	ALL	*	QUAL	*	0.492672	137003	413	2809091522	2546949881	0	3365115	2280133	1085711	2060752	1303287	2.10013	1.5812	3028229	2053024	975845	1891217	1136066	2.10384	1.66471	336886	227109	109866	169535	167221	2.06715	1.01384	12954274	5517257	7448486	8175643	4669187	0.740722	1.75098	3031717	2054326	978031	1894033
HG002	30	SNV	HiFi	0.899889	0.461303	0.609939	pav-hifiasm	PASS	*	QUAL	*	0.492672	137003	413	2809091522	2546949881	0	3365115	2280133	1085711	2060752	1303287	2.10013	1.5812	3028229	2053024	975845	1891217	1136066	2.10384	1.66471	336886	227109	109866	169535	167221	2.06715	1.01384	12954274	5517257	7448486	8175643	4669187	0.740722	1.75098	3031717	2054326	978031	1894033
HG00733	5	SNV	HiFi	0.365716	0.575725	0.447297	pav-hifiasm	ALL	*	QUAL	*	0.25337	715223	28466	3031399176	2546864659	0	3362035	2276815	1085220	2049176	1309841	2.09802	1.56445	1229550	834050	395500	714205	515345	2.10885	1.38588	2132485	1442765	689720	1334971	794496	2.09181	1.68027	2860386	1732167	1055205	1892594	958848	1.64155	1.97382	1229547	834051	395503	714192
HG00733	5	SNV	HiFi	0.365716	0.575725	0.447297	pav-hifiasm	PASS	*	QUAL	*	0.25337	715223	28466	3031399176	2546864659	0	3362035	2276815	1085220	2049176	1309841	2.09802	1.56445	1229550	834050	395500	714205	515345	2.10885	1.38588	2132485	1442765	689720	1334971	794496	2.09181	1.68027	2860386	1732167	1055205	1892594	958848	1.64155	1.97382	1229547	834051	395503	714192
HG00733	8	SNV	HiFi	0.671806	0.745665	0.706811	pav-hifiasm	ALL	*	QUAL	*	0.287168	567440	29212	3031399176	2546864659	0	3362529	2277163	1085366	2049176	1309841	2.09806	1.56445	2258967	1529470	729497	1470631	788336	2.09661	1.86549	1103562	747693	355869	578545	521505	2.10103	1.10938	4249845	2559822	1595139	3042326	1189230	1.60476	2.55823	2258934	1529478	729477	1470570
HG00733	8	SNV	HiFi	0.671806	0.745665	0.706811	pav-hifiasm	PASS	*	QUAL	*	0.287168	567440	29212	3031399176	2546864659	0	3362529	2277163	1085366	2049176	1309841	2.09806	1.56445	2258967	1529470	729497	1470631	788336	2.09661	1.86549	1103562	747693	355869	578545	521505	2.10103	1.10938	4249845	2559822	1595139	3042326	1189230	1.60476	2.55823	2258934	1529478	729477	1470570
HG00733	10	SNV	HiFi	0.801675	0.789563	0.795573	pav-hifiasm	ALL	*	QUAL	*	0.372437	324947	23051	3031399176	2546864659	0	3363120	2277586	1085534	2049176	1309841	2.09812	1.56445	2696129	1826633	869496	1636905	1059224	2.1008	1.54538	666991	450953	216038	412271	250617	2.08738	1.64502	5441155	3032843	2307495	3612395	1799485	1.31434	2.00746	2696096	1826630	869492	1636839
HG00733	10	SNV	HiFi	0.801675	0.789563	0.795573	pav-hifiasm	PASS	*	QUAL	*	0.372437	324947	23051	3031399176	2546864659	0	3363120	2277586	1085534	2049176	1309841	2.09812	1.56445	2696129	1826633	869496	1636905	1059224	2.1008	1.54538	666991	450953	216038	412271	250617	2.08738	1.64502	5441155	3032843	2307495	3612395	1799485	1.31434	2.00746	2696096	1826630	869492	1636839
HG00733	12	SNV	HiFi	0.874256	0.606313	0.71604	pav-hifiasm	ALL	*	QUAL	*	0.386391	196236	17366	3031399176	2546864659	0	3363124	2277580	1085544	2049176	1309841	2.0981	1.56445	2940233	1992318	947915	1774087	1166146	2.10179	1.52132	422891	285262	137629	275089	143695	2.07269	1.9144	7902871	3891374	3914127	6052727	1828726	0.994187	3.30981	2940177	1992313	947892	1773991
HG00733	12	SNV	HiFi	0.874256	0.606313	0.71604	pav-hifiasm	PASS	*	QUAL	*	0.386391	196236	17366	3031399176	2546864659	0	3363124	2277580	1085544	2049176	1309841	2.0981	1.56445	2940233	1992318	947915	1774087	1166146	2.10179	1.52132	422891	285262	137629	275089	143695	2.07269	1.9144	7902871	3891374	3914127	6052727	1828726	0.994187	3.30981	2940177	1992313	947892	1773991
HG00733	15	SNV	HiFi	0.943333	0.635557	0.759448	pav-hifiasm	ALL	*	QUAL	*	0.387825	108256	11151	3031399176	2546864659	0	3363167	2277632	1085535	2049176	1309841	2.09817	1.56445	3172588	2149898	1022690	1962739	1209849	2.1022	1.6223	190579	127734	62845	86437	99992	2.03252	0.864439	8154116	4032162	4029674	6070419	2041457	1.00062	2.97357	3172539	2149899	1022673	1962644
HG00733	15	SNV	HiFi	0.943333	0.635557	0.759448	pav-hifiasm	PASS	*	QUAL	*	0.387825	108256	11151	3031399176	2546864659	0	3363167	2277632	1085535	2049176	1309841	2.09817	1.56445	3172588	2149898	1022690	1962739	1209849	2.1022	1.6223	190579	127734	62845	86437	99992	2.03252	0.864439	8154116	4032162	4029674	6070419	2041457	1.00062	2.97357	3172539	2149899	1022673	1962644
HG00733	17	SNV	HiFi	0.961222	0.728036	0.828535	pav-hifiasm	ALL	*	QUAL	*	0.557974	72039	9067	3031399176	2546864659	0	3363184	2277637	1085547	2049176	1309841	2.09815	1.56445	3232765	2190812	1041953	1992356	1240409	2.1026	1.60621	130419	86825	43594	56820	69432	1.99167	0.818355	10045413	4716312	5372678	7333572	2473368	0.877833	2.96501	3232723	2190825	1041933	1992267
HG00733	17	SNV	HiFi	0.961222	0.728036	0.828535	pav-hifiasm	PASS	*	QUAL	*	0.557974	72039	9067	3031399176	2546864659	0	3363184	2277637	1085547	2049176	1309841	2.09815	1.56445	3232765	2190812	1041953	1992356	1240409	2.1026	1.60621	130419	86825	43594	56820	69432	1.99167	0.818355	10045413	4716312	5372678	7333572	2473368	0.877833	2.96501	3232723	2190825	1041933	1992267
HG00733	20	SNV	HiFi	0.967728	0.503364	0.662256	pav-hifiasm	ALL	*	QUAL	*	0.494232	63278	7348	3031399176	2546864659	0	3363234	2277670	1085564	2049176	1309841	2.09814	1.56445	3254695	2204886	1049809	2006208	1248487	2.10027	1.60691	108539	72784	35755	42968	61354	2.03563	0.700329	12784107	5574919	7156856	10206892	2474450	0.778962	4.12491	3254649	2204891	1049793	2006113
HG00733	20	SNV	HiFi	0.967728	0.503364	0.662256	pav-hifiasm	PASS	*	QUAL	*	0.494232	63278	7348	3031399176	2546864659	0	3363234	2277670	1085564	2049176	1309841	2.09814	1.56445	3254695	2204886	1049809	2006208	1248487	2.10027	1.60691	108539	72784	35755	42968	61354	2.03563	0.700329	12784107	5574919	7156856	10206892	2474450	0.778962	4.12491	3254649	2204891	1049793	2006113
HG00733	25	SNV	HiFi	0.966559	0.4192	0.584779	pav-hifiasm	ALL	*	QUAL	*	0.548919	55147	6454	3031399176	2546864659	0	3363243	2277678	1085565	2049176	1309841	2.09815	1.56445	3250774	2202742	1048032	1993689	1257085	2.10179	1.58596	112469	74936	37533	55487	52756	1.99654	1.05177	17191110	7117970	10268065	13227459	3490574	0.693214	3.78948	3250723	2202743	1048016	1993587
HG00733	25	SNV	HiFi	0.966559	0.4192	0.584779	pav-hifiasm	PASS	*	QUAL	*	0.548919	55147	6454	3031399176	2546864659	0	3363243	2277678	1085565	2049176	1309841	2.09815	1.56445	3250774	2202742	1048032	1993689	1257085	2.10179	1.58596	112469	74936	37533	55487	52756	1.99654	1.05177	17191110	7117970	10268065	13227459	3490574	0.693214	3.78948	3250723	2202743	1048016	1993587
HG00733	30	SNV	HiFi	0.892642	0.453697	0.601616	pav-hifiasm	ALL	*	QUAL	*	0.528749	163288	5643	3031399176	2546864659	0	3363052	2277539	1085513	2049176	1309841	2.09812	1.56445	3002003	2034487	967516	1876184	1125819	2.10279	1.66651	361049	243052	117997	172992	184022	2.05982	0.940062	14040628	6045413	8183742	8300761	5284228	0.73871	1.57086	3001959	2034488	967501	1876096
HG00733	30	SNV	HiFi	0.892642	0.453697	0.601616	pav-hifiasm	PASS	*	QUAL	*	0.528749	163288	5643	3031399176	2546864659	0	3363052	2277539	1085513	2049176	1309841	2.09812	1.56445	3002003	2034487	967516	1876184	1125819	2.10279	1.66651	361049	243052	117997	172992	184022	2.05982	0.940062	14040628	6045413	8183742	8300761	5284228	0.73871	1.57086	3001959	2034488	967501	1876096
HG002	5	SNV	HiFi	0.383123	0.582181	0.462128	pav-hifiasmtrio	ALL	*	QUAL	*	0.193	734231	30592	2809091522	2546949881	0	3365115	2280133	1085711	2060752	1303287	2.10013	1.5812	1289253	872320	417066	808446	480617	2.09156	1.6821	2075862	1407813	668645	1252306	822670	2.10547	1.52225	2745773	1692209	1027200	1942107	802388	1.6474	2.42041	1290020	872580	417573	808991
HG002	5	SNV	HiFi	0.383123	0.582181	0.462128	pav-hifiasmtrio	PASS	*	QUAL	*	0.193	734231	30592	2809091522	2546949881	0	3365115	2280133	1085711	2060752	1303287	2.10013	1.5812	1289253	872320	417066	808446	480617	2.09156	1.6821	2075862	1407813	668645	1252306	822670	2.10547	1.52225	2745773	1692209	1027200	1942107	802388	1.6474	2.42041	1290020	872580	417573	808991
HG002	8	SNV	HiFi	0.699573	0.765195	0.730914	pav-hifiasmtrio	ALL	*	QUAL	*	0.244013	513521	27451	2809091522	2546949881	0	3365115	2280133	1085711	2060752	1303287	2.10013	1.5812	2354142	1594858	759714	1497334	856170	2.09929	1.74887	1010973	685275	325997	563418	447117	2.10209	1.26011	4072919	2469843	1560653	2863602	1201089	1.58257	2.38417	2356092	1595565	760957	1498833
HG002	8	SNV	HiFi	0.699573	0.765195	0.730914	pav-hifiasmtrio	PASS	*	QUAL	*	0.244013	513521	27451	2809091522	2546949881	0	3365115	2280133	1085711	2060752	1303287	2.10013	1.5812	2354142	1594858	759714	1497334	856170	2.09929	1.74887	1010973	685275	325997	563418	447117	2.10209	1.26011	4072919	2469843	1560653	2863602	1201089	1.58257	2.38417	2356092	1595565	760957	1498833
HG002	10	SNV	HiFi	0.579211	0.662745	0.618169	pav-hifiasmtrio	ALL	*	QUAL	*	0.402967	578868	14469	2809091522	2546949881	0	3365115	2280133	1085711	2060752	1303287	2.10013	1.5812	1949110	1321248	628102	731818	1216935	2.10356	0.601362	1416005	958885	457609	1328934	86352	2.09542	15.3897	4929784	2624277	2264085	2653602	2261542	1.15909	1.17336	1950622	1321795	629067	732768
HG002	10	SNV	HiFi	0.579211	0.662745	0.618169	pav-hifiasmtrio	PASS	*	QUAL	*	0.402967	578868	14469	2809091522	2546949881	0	3365115	2280133	1085711	2060752	1303287	2.10013	1.5812	1949110	1321248	628102	731818	1216935	2.10356	0.601362	1416005	958885	457609	1328934	86352	2.09542	15.3897	4929784	2624277	2264085	2653602	2261542	1.15909	1.17336	1950622	1321795	629067	732768
HG002	12	SNV	HiFi	0.905306	0.898421	0.901851	pav-hifiasmtrio	ALL	*	QUAL	*	0.28198	160805	12425	2809091522	2546949881	0	3365115	2280133	1085711	2060752	1303287	2.10013	1.5812	3046459	2063494	983614	1891294	1154199	2.09787	1.63862	318656	216639	102097	169458	149088	2.12189	1.13663	4727566	2818438	1858083	2802285	1915060	1.51685	1.46329	3049679	2064700	985628	1893839
HG002	12	SNV	HiFi	0.905306	0.898421	0.901851	pav-hifiasmtrio	PASS	*	QUAL	*	0.28198	160805	12425	2809091522	2546949881	0	3365115	2280133	1085711	2060752	1303287	2.10013	1.5812	3046459	2063494	983614	1891294	1154199	2.09787	1.63862	318656	216639	102097	169458	149088	2.12189	1.13663	4727566	2818438	1858083	2802285	1915060	1.51685	1.46329	3049679	2064700	985628	1893839
HG002	15	SNV	HiFi	0.969886	0.760123	0.852288	pav-hifiasmtrio	ALL	*	QUAL	*	0.38856	53767	5698	2809091522	2546949881	0	3365115	2280133	1085711	2060752	1303287	2.10013	1.5812	3263777	2211762	1052718	2006539	1256197	2.101	1.59731	101338	68371	32993	54213	47090	2.07229	1.15126	7030266	3621572	3368796	5122931	1880942	1.07503	2.7236	3267453	2213170	1054986	2009523
HG002	15	SNV	HiFi	0.969886	0.760123	0.852288	pav-hifiasmtrio	PASS	*	QUAL	*	0.38856	53767	5698	2809091522	2546949881	0	3365115	2280133	1085711	2060752	1303287	2.10013	1.5812	3263777	2211762	1052718	2006539	1256197	2.101	1.59731	101338	68371	32993	54213	47090	2.07229	1.15126	7030266	3621572	3368796	5122931	1880942	1.07503	2.7236	3267453	2213170	1054986	2009523
HG002	17	SNV	HiFi	0.981717	0.580794	0.729819	pav-hifiasmtrio	ALL	*	QUAL	*	0.409759	34305	3198	2809091522	2546949881	0	3365115	2280133	1085711	2060752	1303287	2.10013	1.5812	3303589	2238030	1066273	2027468	1275065	2.09893	1.59009	61526	42103	19438	33284	28222	2.16602	1.17936	9647845	4483486	5123943	6833011	2768728	0.875007	2.46792	3307359	2239469	1068604	2030513
HG002	17	SNV	HiFi	0.981717	0.580794	0.729819	pav-hifiasmtrio	PASS	*	QUAL	*	0.409759	34305	3198	2809091522	2546949881	0	3365115	2280133	1085711	2060752	1303287	2.10013	1.5812	3303589	2238030	1066273	2027468	1275065	2.09893	1.59009	61526	42103	19438	33284	28222	2.16602	1.17936	9647845	4483486	5123943	6833011	2768728	0.875007	2.46792	3307359	2239469	1068604	2030513
HG002	20	SNV	HiFi	0.990077	0.47731	0.644102	pav-hifiasmtrio	ALL	*	QUAL	*	0.468067	15468	1637	2809091522	2546949881	0	3365115	2280133	1085711	2060752	1303287	2.10013	1.5812	3331723	2257322	1075120	2040715	1289946	2.0996	1.58202	33392	22811	10591	20037	13341	2.15381	1.50191	13137741	5738274	7587733	9942721	2814246	0.756257	3.533	3335630	2258799	1077550	2043872
HG002	20	SNV	HiFi	0.990077	0.47731	0.644102	pav-hifiasmtrio	PASS	*	QUAL	*	0.468067	15468	1637	2809091522	2546949881	0	3365115	2280133	1085711	2060752	1303287	2.10013	1.5812	3331723	2257322	1075120	2040715	1289946	2.0996	1.58202	33392	22811	10591	20037	13341	2.15381	1.50191	13137741	5738274	7587733	9942721	2814246	0.756257	3.533	3335630	2258799	1077550	2043872
HG002	25	SNV	HiFi	0.97296	0.372424	0.538662	pav-hifiasmtrio	ALL	*	QUAL	*	0.432265	47451	741	2809091522	2546949881	0	3365115	2280133	1085711	2060752	1303287	2.10013	1.5812	3274122	2218629	1056202	2018092	1254991	2.10057	1.60805	90993	61504	29509	42660	48296	2.08425	0.883303	15502925	6467695	9136433	12464662	2798110	0.707902	4.45467	3277913	2220067	1058555	2021166
HG002	25	SNV	HiFi	0.97296	0.372424	0.538662	pav-hifiasmtrio	PASS	*	QUAL	*	0.432265	47451	741	2809091522	2546949881	0	3365115	2280133	1085711	2060752	1303287	2.10013	1.5812	3274122	2218629	1056202	2018092	1254991	2.10057	1.60805	90993	61504	29509	42660	48296	2.08425	0.883303	15502925	6467695	9136433	12464662	2798110	0.707902	4.45467	3277913	2220067	1058555	2021166
HG002	30	SNV	HiFi	0.94578	0.411875	0.573848	pav-hifiasmtrio	ALL	*	QUAL	*	0.463188	94127	401	2809091522	2546949881	0	3365115	2280133	1085711	2060752	1303287	2.10013	1.5812	3182659	2157695	1025642	1976843	1204815	2.10375	1.64079	182456	122438	60069	83909	98472	2.03829	0.85211	14411344	6177302	8515518	10717716	3178820	0.725417	3.3716	3186343	2159084	1027937	1979848
HG002	30	SNV	HiFi	0.94578	0.411875	0.573848	pav-hifiasmtrio	PASS	*	QUAL	*	0.463188	94127	401	2809091522	2546949881	0	3365115	2280133	1085711	2060752	1303287	2.10013	1.5812	3182659	2157695	1025642	1976843	1204815	2.10375	1.64079	182456	122438	60069	83909	98472	2.03829	0.85211	14411344	6177302	8515518	10717716	3178820	0.725417	3.3716	3186343	2159084	1027937	1979848
HG00733	5	SNV	HiFi	0.358982	0.572078	0.441144	pav-hifiasmtrio	ALL	*	QUAL	*	0.252886	710863	27901	3031399176	2546864659	0	3362142	2276894	1085248	2049176	1309841	2.09804	1.56445	1206950	817536	389414	766728	440222	2.0994	1.74168	2155192	1459358	695834	1282448	869619	2.09728	1.47472	2823881	1713007	1048503	2026484	795022	1.63376	2.54897	1206948	817537	389419	766715
HG00733	5	SNV	HiFi	0.358982	0.572078	0.441144	pav-hifiasmtrio	PASS	*	QUAL	*	0.252886	710863	27901	3031399176	2546864659	0	3362142	2276894	1085248	2049176	1309841	2.09804	1.56445	1206950	817536	389414	766728	440222	2.0994	1.74168	2155192	1459358	695834	1282448	869619	2.09728	1.47472	2823881	1713007	1048503	2026484	795022	1.63376	2.54897	1206948	817537	389419	766715
HG00733	8	SNV	HiFi	0.684382	0.758661	0.71961	pav-hifiasmtrio	ALL	*	QUAL	*	0.280763	530519	29799	3031399176	2546864659	0	3362622	2277244	1085378	2049176	1309841	2.09811	1.56445	2301319	1559041	742278	1464276	837043	2.10035	1.74934	1061303	718203	343100	584900	472798	2.09328	1.2371	4217448	2550501	1573232	2987724	1211987	1.62119	2.46515	2301280	1559041	742260	1464210
HG00733	8	SNV	HiFi	0.684382	0.758661	0.71961	pav-hifiasmtrio	PASS	*	QUAL	*	0.280763	530519	29799	3031399176	2546864659	0	3362622	2277244	1085378	2049176	1309841	2.09811	1.56445	2301319	1559041	742278	1464276	837043	2.10035	1.74934	1061303	718203	343100	584900	472798	2.09328	1.2371	4217448	2550501	1573232	2987724	1211987	1.62119	2.46515	2301280	1559041	742260	1464210
HG00733	10	SNV	HiFi	0.841116	0.857031	0.848999	pav-hifiasmtrio	ALL	*	QUAL	*	0.389785	276939	24317	3031399176	2546864659	0	3363176	2277608	1085568	2049176	1309841	2.09808	1.56445	2828821	1916149	912672	1745967	1082854	2.09949	1.61238	534355	361459	172896	303209	226987	2.09062	1.3358	5409051	3056640	2251372	3729968	1659645	1.35768	2.24745	2828787	1916146	912664	1745899
HG00733	10	SNV	HiFi	0.841116	0.857031	0.848999	pav-hifiasmtrio	PASS	*	QUAL	*	0.389785	276939	24317	3031399176	2546864659	0	3363176	2277608	1085568	2049176	1309841	2.09808	1.56445	2828821	1916149	912672	1745967	1082854	2.09949	1.61238	534355	361459	172896	303209	226987	2.09062	1.3358	5409051	3056640	2251372	3729968	1659645	1.35768	2.24745	2828787	1916146	912664	1745899
HG00733	12	SNV	HiFi	0.918647	0.793069	0.851252	pav-hifiasmtrio	ALL	*	QUAL	*	0.378499	148951	18133	3031399176	2546864659	0	3363110	2277577	1085533	2049176	1309841	2.09812	1.56445	3089512	2093456	996056	1909098	1180414	2.10175	1.61731	273598	184121	89477	140078	129427	2.05775	1.08229	6267987	3393427	2775550	4395217	1852984	1.22261	2.37197	3089451	2093452	996030	1908994
HG00733	12	SNV	HiFi	0.918647	0.793069	0.851252	pav-hifiasmtrio	PASS	*	QUAL	*	0.378499	148951	18133	3031399176	2546864659	0	3363110	2277577	1085533	2049176	1309841	2.09812	1.56445	3089512	2093456	996056	1909098	1180414	2.10175	1.61731	273598	184121	89477	140078	129427	2.05775	1.08229	6267987	3393427	2775550	4395217	1852984	1.22261	2.37197	3089451	2093452	996030	1908994
HG00733	15	SNV	HiFi	0.963576	0.768135	0.854827	pav-hifiasmtrio	ALL	*	QUAL	*	0.517976	69188	11571	3031399176	2546864659	0	3363139	2277607	1085532	2049176	1309841	2.09815	1.56445	3240640	2194956	1045684	1988395	1252245	2.09906	1.58786	122499	82651	39848	60781	57596	2.07416	1.0553	8752218	4243475	4432354	6493227	2191611	0.957386	2.96276	3240595	2194961	1045667	1988302
HG00733	15	SNV	HiFi	0.963576	0.768135	0.854827	pav-hifiasmtrio	PASS	*	QUAL	*	0.517976	69188	11571	3031399176	2546864659	0	3363139	2277607	1085532	2049176	1309841	2.09815	1.56445	3240640	2194956	1045684	1988395	1252245	2.09906	1.58786	122499	82651	39848	60781	57596	2.07416	1.0553	8752218	4243475	4432354	6493227	2191611	0.957386	2.96276	3240595	2194961	1045667	1988302
HG00733	17	SNV	HiFi	0.963277	0.666539	0.787894	pav-hifiasmtrio	ALL	*	QUAL	*	0.486963	58618	9129	3031399176	2546864659	0	3363216	2277660	1085556	2049176	1309841	2.09815	1.56445	3239708	2195555	1044153	1983281	1256427	2.10271	1.57851	123508	82105	41403	65895	53414	1.98307	1.23367	9473842	4533323	5000659	6332102	2863126	0.906545	2.2116	3239667	2195568	1044133	1983194
HG00733	17	SNV	HiFi	0.963277	0.666539	0.787894	pav-hifiasmtrio	PASS	*	QUAL	*	0.486963	58618	9129	3031399176	2546864659	0	3363216	2277660	1085556	2049176	1309841	2.09815	1.56445	3239708	2195555	1044153	1983281	1256427	2.10271	1.57851	123508	82105	41403	65895	53414	1.98307	1.23367	9473842	4533323	5000659	6332102	2863126	0.906545	2.2116	3239667	2195568	1044133	1983194
HG00733	20	SNV	HiFi	0.979778	0.518083	0.677775	pav-hifiasmtrio	ALL	*	QUAL	*	0.538021	31695	7410	3031399176	2546864659	0	3363230	2277668	1085562	2049176	1309841	2.09815	1.56445	3295218	2232641	1062577	2012395	1282823	2.10116	1.56872	68012	45027	22985	36781	27018	1.95897	1.36135	13767507	5934015	7860406	10877931	2665639	0.754925	4.0808	3295167	2232642	1062561	2012294
HG00733	20	SNV	HiFi	0.979778	0.518083	0.677775	pav-hifiasmtrio	PASS	*	QUAL	*	0.538021	31695	7410	3031399176	2546864659	0	3363230	2277668	1085562	2049176	1309841	2.09815	1.56445	3295218	2232641	1062577	2012395	1282823	2.10116	1.56872	68012	45027	22985	36781	27018	1.95897	1.36135	13767507	5934015	7860406	10877931	2665639	0.754925	4.0808	3295167	2232642	1062561	2012294
HG00733	25	SNV	HiFi	0.965427	0.427576	0.592667	pav-hifiasmtrio	ALL	*	QUAL	*	0.541313	57743	6438	3031399176	2546864659	0	3363200	2277642	1085558	2049176	1309841	2.09813	1.56445	3246923	2199934	1046989	1993843	1253080	2.1012	1.59115	116277	77708	38569	55333	56761	2.01478	0.974842	16555225	6892194	9814800	11605880	4542188	0.702225	2.55513	3246873	2199935	1046973	1993743
HG00733	25	SNV	HiFi	0.965427	0.427576	0.592667	pav-hifiasmtrio	PASS	*	QUAL	*	0.541313	57743	6438	3031399176	2546864659	0	3363200	2277642	1085558	2049176	1309841	2.09813	1.56445	3246923	2199934	1046989	1993843	1253080	2.1012	1.59115	116277	77708	38569	55333	56761	2.01478	0.974842	16555225	6892194	9814800	11605880	4542188	0.702225	2.55513	3246873	2199935	1046973	1993743
HG00733	30	SNV	HiFi	0.948218	0.412276	0.574685	pav-hifiasmtrio	ALL	*	QUAL	*	0.537065	73100	6073	3031399176	2546864659	0	3363226	2277660	1085566	2049176	1309841	2.09813	1.56445	3189071	2160424	1028647	1964164	1224907	2.10026	1.60352	174155	117236	56919	85012	84934	2.0597	1.00092	16708920	6941695	9948806	11392254	4865381	0.697742	2.34149	3189019	2160424	1028631	1964061
HG00733	30	SNV	HiFi	0.948218	0.412276	0.574685	pav-hifiasmtrio	PASS	*	QUAL	*	0.537065	73100	6073	3031399176	2546864659	0	3363226	2277660	1085566	2049176	1309841	2.09813	1.56445	3189071	2160424	1028647	1964164	1224907	2.10026	1.60352	174155	117236	56919	85012	84934	2.0597	1.00092	16708920	6941695	9948806	11392254	4865381	0.697742	2.34149	3189019	2160424	1028631	1964061
HG002	5	SNV	HiFi	0.21544	0.58063	0.314271	pav-pgas	ALL	*	QUAL	*	0.19683	420136	16902	2809091522	2546949881	0	3365115	2280133	1085711	2060752	1303287	2.10013	1.5812	724981	489803	235248	425700	299179	2.08207	1.42289	2640134	1790330	850463	1635052	1004108	2.10512	1.62836	1555546	952996	591991	1057471	497131	1.60982	2.12715	725421	489952	235539	426027
HG002	5	SNV	HiFi	0.21544	0.58063	0.314271	pav-pgas	PASS	*	QUAL	*	0.19683	420136	16902	2809091522	2546949881	0	3365115	2280133	1085711	2060752	1303287	2.10013	1.5812	724981	489803	235248	425700	299179	2.08207	1.42289	2640134	1790330	850463	1635052	1004108	2.10512	1.62836	1555546	952996	591991	1057471	497131	1.60982	2.12715	725421	489952	235539	426027
HG002	8	SNV	HiFi	0.609217	0.778369	0.683483	pav-pgas	ALL	*	QUAL	*	0.247135	398425	23031	2809091522	2546949881	0	3365115	2280133	1085711	2060752	1303287	2.10013	1.5812	2050084	1387778	662674	1275016	774521	2.09421	1.6462	1315031	892355	423037	785736	528766	2.1094	1.48598	3501304	2111459	1355984	2341082	1153054	1.55714	2.03033	2051788	1388412	663744	1276347
HG002	8	SNV	HiFi	0.609217	0.778369	0.683483	pav-pgas	PASS	*	QUAL	*	0.247135	398425	23031	2809091522	2546949881	0	3365115	2280133	1085711	2060752	1303287	2.10013	1.5812	2050084	1387778	662674	1275016	774521	2.09421	1.6462	1315031	892355	423037	785736	528766	2.1094	1.48598	3501304	2111459	1355984	2341082	1153054	1.55714	2.03033	2051788	1388412	663744	1276347
HG002	10	SNV	HiFi	0.581834	0.756681	0.657838	pav-pgas	ALL	*	QUAL	*	0.342299	509708	14864	2809091522	2546949881	0	3365115	2280133	1085711	2060752	1303287	2.10013	1.5812	1957939	1327781	630446	826772	1130754	2.1061	0.731169	1407176	952352	455265	1233980	172533	2.09186	7.15214	3937293	2311710	1651799	1783234	2041960	1.39951	0.873295	1959470	1328332	631426	827802
HG002	10	SNV	HiFi	0.581834	0.756681	0.657838	pav-pgas	PASS	*	QUAL	*	0.342299	509708	14864	2809091522	2546949881	0	3365115	2280133	1085711	2060752	1303287	2.10013	1.5812	1957939	1327781	630446	826772	1130754	2.1061	0.731169	1407176	952352	455265	1233980	172533	2.09186	7.15214	3937293	2311710	1651799	1783234	2041960	1.39951	0.873295	1959470	1328332	631426	827802
HG002	12	SNV	HiFi	0.917622	0.904719	0.911125	pav-pgas	ALL	*	QUAL	*	0.325718	138051	12573	2809091522	2546949881	0	3365115	2280133	1085711	2060752	1303287	2.10013	1.5812	3087904	2091392	997159	1890012	1196932	2.09735	1.57905	277211	188741	88552	170740	106355	2.13141	1.60538	5067120	2943775	2071855	3347390	1708151	1.42084	1.95966	3091122	2092587	999182	1892562
HG002	12	SNV	HiFi	0.917622	0.904719	0.911125	pav-pgas	PASS	*	QUAL	*	0.325718	138051	12573	2809091522	2546949881	0	3365115	2280133	1085711	2060752	1303287	2.10013	1.5812	3087904	2091392	997159	1890012	1196932	2.09735	1.57905	277211	188741	88552	170740	106355	2.13141	1.60538	5067120	2943775	2071855	3347390	1708151	1.42084	1.95966	3091122	2092587	999182	1892562
HG002	15	SNV	HiFi	0.965754	0.706255	0.815867	pav-pgas	ALL	*	QUAL	*	0.302175	58990	5937	2809091522	2546949881	0	3365115	2280133	1085711	2060752	1303287	2.10013	1.5812	3249874	2202597	1047975	1992625	1256210	2.10176	1.58622	115241	77536	37736	68127	47077	2.0547	1.44714	6601456	3504182	3102091	4787549	1726709	1.12962	2.77264	3253473	2203974	1050197	1995527
HG002	15	SNV	HiFi	0.965754	0.706255	0.815867	pav-pgas	PASS	*	QUAL	*	0.302175	58990	5937	2809091522	2546949881	0	3365115	2280133	1085711	2060752	1303287	2.10013	1.5812	3249874	2202597	1047975	1992625	1256210	2.10176	1.58622	115241	77536	37736	68127	47077	2.0547	1.44714	6601456	3504182	3102091	4787549	1726709	1.12962	2.77264	3253473	2203974	1050197	1995527
HG002	17	SNV	HiFi	0.986252	0.646023	0.780679	pav-pgas	ALL	*	QUAL	*	0.333966	24136	3343	2809091522	2546949881	0	3365115	2280133	1085711	2060752	1303287	2.10013	1.5812	3318850	2248487	1071080	2032708	1285080	2.09927	1.58178	46265	31646	14631	28044	18207	2.16294	1.54029	7722147	3871613	3812017	5313690	2382319	1.01563	2.23047	3322634	2249927	1073424	2035770
HG002	17	SNV	HiFi	0.986252	0.646023	0.780679	pav-pgas	PASS	*	QUAL	*	0.333966	24136	3343	2809091522	2546949881	0	3365115	2280133	1085711	2060752	1303287	2.10013	1.5812	3318850	2248487	1071080	2032708	1285080	2.09927	1.58178	46265	31646	14631	28044	18207	2.16294	1.54029	7722147	3871613	3812017	5313690	2382319	1.01563	2.23047	3322634	2249927	1073424	2035770
HG002	20	SNV	HiFi	0.991448	0.444312	0.613629	pav-pgas	ALL	*	QUAL	*	0.386088	12110	1699	2809091522	2546949881	0	3365115	2280133	1085711	2060752	1303287	2.10013	1.5812	3336337	2260784	1076275	2042916	1292355	2.10056	1.58077	28778	19349	9436	17836	10932	2.05055	1.63154	12245692	5408433	6912118	9854352	2191856	0.782457	4.49589	3340239	2262248	1078713	2046072
HG002	20	SNV	HiFi	0.991448	0.444312	0.613629	pav-pgas	PASS	*	QUAL	*	0.386088	12110	1699	2809091522	2546949881	0	3365115	2280133	1085711	2060752	1303287	2.10013	1.5812	3336337	2260784	1076275	2042916	1292355	2.10056	1.58077	28778	19349	9436	17836	10932	2.05055	1.63154	12245692	5408433	6912118	9854352	2191856	0.782457	4.49589	3340239	2262248	1078713	2046072
HG002	25	SNV	HiFi	0.957674	0.585721	0.726878	pav-pgas	ALL	*	QUAL	*	0.50414	75329	747	2809091522	2546949881	0	3365115	2280133	1085711	2060752	1303287	2.10013	1.5812	3222682	2184407	1038965	1993850	1227811	2.10248	1.62391	142433	95726	46746	66902	75476	2.04779	0.886401	11108823	4974228	6175275	6800441	4151011	0.805507	1.63826	3226400	2185798	1041292	1996863
HG002	25	SNV	HiFi	0.957674	0.585721	0.726878	pav-pgas	PASS	*	QUAL	*	0.50414	75329	747	2809091522	2546949881	0	3365115	2280133	1085711	2060752	1303287	2.10013	1.5812	3222682	2184407	1038965	1993850	1227811	2.10248	1.62391	142433	95726	46746	66902	75476	2.04779	0.886401	11108823	4974228	6175275	6800441	4151011	0.805507	1.63826	3226400	2185798	1041292	1996863
HG002	30	SNV	HiFi	0.937546	0.451848	0.609803	pav-pgas	ALL	*	QUAL	*	0.454119	111852	425	2809091522	2546949881	0	3365115	2280133	1085711	2060752	1303287	2.10013	1.5812	3154949	2140152	1015465	1962424	1191539	2.10756	1.64697	210166	139981	70246	98328	111748	1.99273	0.879908	12805648	5485052	7285594	8911484	3852450	0.752863	2.3132	3158582	2141503	1017747	1965380
HG002	30	SNV	HiFi	0.937546	0.451848	0.609803	pav-pgas	PASS	*	QUAL	*	0.454119	111852	425	2809091522	2546949881	0	3365115	2280133	1085711	2060752	1303287	2.10013	1.5812	3154949	2140152	1015465	1962424	1191539	2.10756	1.64697	210166	139981	70246	98328	111748	1.99273	0.879908	12805648	5485052	7285594	8911484	3852450	0.752863	2.3132	3158582	2141503	1017747	1965380
HG00733	5	SNV	HiFi	0.23105	0.575159	0.329667	pav-pgas	ALL	*	QUAL	*	0.24952	455858	18341	3031399176	2546864659	0	3360712	2275930	1084782	2049176	1309841	2.09805	1.56445	776491	524719	251772	453796	322695	2.0841	1.40627	2584221	1751211	833010	1595380	987146	2.10227	1.61615	1798908	1081316	667612	1267323	530952	1.61968	2.38689	776491	524719	251776	453793
HG00733	5	SNV	HiFi	0.23105	0.575159	0.329667	pav-pgas	PASS	*	QUAL	*	0.24952	455858	18341	3031399176	2546864659	0	3360712	2275930	1084782	2049176	1309841	2.09805	1.56445	776491	524719	251772	453796	322695	2.0841	1.40627	2584221	1751211	833010	1595380	987146	2.10227	1.61615	1798908	1081316	667612	1267323	530952	1.61968	2.38689	776491	524719	251776	453793
HG00733	8	SNV	HiFi	0.678975	0.780205	0.726079	pav-pgas	ALL	*	QUAL	*	0.27319	444734	28805	3031399176	2546864659	0	3362208	2276931	1085277	2049176	1309841	2.09802	1.56445	2282856	1546345	736511	1419265	863591	2.09955	1.64345	1079352	730586	348766	629911	446250	2.09477	1.41157	4025716	2439981	1496290	2805388	1201040	1.63069	2.3358	2282826	1546354	736492	1419210
HG00733	8	SNV	HiFi	0.678975	0.780205	0.726079	pav-pgas	PASS	*	QUAL	*	0.27319	444734	28805	3031399176	2546864659	0	3362208	2276931	1085277	2049176	1309841	2.09802	1.56445	2282856	1546345	736511	1419265	863591	2.09955	1.64345	1079352	730586	348766	629911	446250	2.09477	1.41157	4025716	2439981	1496290	2805388	1201040	1.63069	2.3358	2282826	1546354	736492	1419210
HG00733	10	SNV	HiFi	0.658453	0.769031	0.709459	pav-pgas	ALL	*	QUAL	*	0.415357	508385	19021	3031399176	2546864659	0	3362701	2277283	1085418	2049176	1309841	2.09807	1.56445	2214182	1502011	712171	1190951	1023231	2.10906	1.16391	1148519	775272	373247	858225	286610	2.0771	2.9944	4924647	2738359	2096428	3155488	1749679	1.3062	1.80347	2214164	1502012	712167	1190912
HG00733	10	SNV	HiFi	0.658453	0.769031	0.709459	pav-pgas	PASS	*	QUAL	*	0.415357	508385	19021	3031399176	2546864659	0	3362701	2277283	1085418	2049176	1309841	2.09807	1.56445	2214182	1502011	712171	1190951	1023231	2.10906	1.16391	1148519	775272	373247	858225	286610	2.0771	2.9944	4924647	2738359	2096428	3155488	1749679	1.3062	1.80347	2214164	1502012	712167	1190912
HG00733	12	SNV	HiFi	0.88602	0.805427	0.843804	pav-pgas	ALL	*	QUAL	*	0.341723	173607	17840	3031399176	2546864659	0	3363135	2277582	1085553	2049176	1309841	2.09808	1.56445	2979806	2018561	961245	1772595	1207211	2.09994	1.46834	383329	259021	124308	276581	102630	2.0837	2.69493	5620116	3148378	2380616	3598953	1994286	1.32251	1.80463	2979753	2018556	961223	1772505
HG00733	12	SNV	HiFi	0.88602	0.805427	0.843804	pav-pgas	PASS	*	QUAL	*	0.341723	173607	17840	3031399176	2546864659	0	3363135	2277582	1085553	2049176	1309841	2.09808	1.56445	2979806	2018561	961245	1772595	1207211	2.09994	1.46834	383329	259021	124308	276581	102630	2.0837	2.69493	5620116	3148378	2380616	3598953	1994286	1.32251	1.80463	2979753	2018556	961223	1772505
HG00733	15	SNV	HiFi	0.963479	0.741585	0.838094	pav-pgas	ALL	*	QUAL	*	0.467521	61200	11499	3031399176	2546864659	0	3363335	2277731	1085604	2049176	1309841	2.09812	1.56445	3240502	2195840	1044662	1980202	1260300	2.10196	1.57121	122833	81891	40942	68974	49541	2.00017	1.39226	8206203	4057192	4066498	5708747	2442264	0.997712	2.33748	3240455	2195844	1044644	1980107
HG00733	15	SNV	HiFi	0.963479	0.741585	0.838094	pav-pgas	PASS	*	QUAL	*	0.467521	61200	11499	3031399176	2546864659	0	3363335	2277731	1085604	2049176	1309841	2.09812	1.56445	3240502	2195840	1044662	1980202	1260300	2.10196	1.57121	122833	81891	40942	68974	49541	2.00017	1.39226	8206203	4057192	4066498	5708747	2442264	0.997712	2.33748	3240455	2195844	1044644	1980107
HG00733	17	SNV	HiFi	0.970822	0.623141	0.759063	pav-pgas	ALL	*	QUAL	*	0.481246	42215	9437	3031399176	2546864659	0	3363135	2277603	1085532	2049176	1309841	2.09814	1.56445	3265006	2213132	1051874	1993484	1271522	2.10399	1.56779	98129	64471	33658	55692	38319	1.91547	1.45338	10100219	4725933	5400444	7101665	2774145	0.875101	2.55995	3264964	2213145	1051854	1993395
HG00733	17	SNV	HiFi	0.970822	0.623141	0.759063	pav-pgas	PASS	*	QUAL	*	0.481246	42215	9437	3031399176	2546864659	0	3363135	2277603	1085532	2049176	1309841	2.09814	1.56445	3265006	2213132	1051874	1993484	1271522	2.10399	1.56779	98129	64471	33658	55692	38319	1.91547	1.45338	10100219	4725933	5400444	7101665	2774145	0.875101	2.55995	3264964	2213145	1051854	1993395
HG00733	20	SNV	HiFi	0.971791	0.549445	0.70199	pav-pgas	ALL	*	QUAL	*	0.453957	45612	7365	3031399176	2546864659	0	3363154	2277607	1085547	2049176	1309841	2.09812	1.56445	3268283	2214789	1053494	2001162	1267121	2.10233	1.5793	94871	62818	32053	48014	42720	1.95982	1.12392	10893361	4953491	5881660	8245815	2550684	0.842193	3.23279	3268236	2214794	1053478	2001065
HG00733	20	SNV	HiFi	0.971791	0.549445	0.70199	pav-pgas	PASS	*	QUAL	*	0.453957	45612	7365	3031399176	2546864659	0	3363154	2277607	1085547	2049176	1309841	2.09812	1.56445	3268283	2214789	1053494	2001162	1267121	2.10233	1.5793	94871	62818	32053	48014	42720	1.95982	1.12392	10893361	4953491	5881660	8245815	2550684	0.842193	3.23279	3268236	2214794	1053478	2001065
HG00733	25	SNV	HiFi	0.964811	0.481775	0.642647	pav-pgas	ALL	*	QUAL	*	0.51842	54413	6423	3031399176	2546864659	0	3363214	2277652	1085562	2049176	1309841	2.09813	1.56445	3244865	2198655	1046210	1992407	1252458	2.10154	1.5908	118349	78997	39352	56769	57383	2.00745	0.9893	13985465	6052711	8078834	10744472	2845047	0.749206	3.77655	3244817	2198660	1046194	1992307
HG00733	25	SNV	HiFi	0.964811	0.481775	0.642647	pav-pgas	PASS	*	QUAL	*	0.51842	54413	6423	3031399176	2546864659	0	3363214	2277652	1085562	2049176	1309841	2.09813	1.56445	3244865	2198655	1046210	1992407	1252458	2.10154	1.5908	118349	78997	39352	56769	57383	2.00745	0.9893	13985465	6052711	8078834	10744472	2845047	0.749206	3.77655	3244817	2198660	1046194	1992307
HG00733	30	SNV	HiFi	0.916941	0.362038	0.519114	pav-pgas	ALL	*	QUAL	*	0.431279	139213	5802	3031399176	2546864659	0	3363172	2277627	1085545	2049176	1309841	2.09814	1.56445	3083831	2088782	995049	1920982	1162849	2.09918	1.65196	279341	188845	90496	128194	146992	2.08678	0.872115	14977157	6338265	8771088	10785596	3830143	0.722632	2.81598	3083781	2088783	995033	1920882
HG00733	30	SNV	HiFi	0.916941	0.362038	0.519114	pav-pgas	PASS	*	QUAL	*	0.431279	139213	5802	3031399176	2546864659	0	3363172	2277627	1085545	2049176	1309841	2.09814	1.56445	3083831	2088782	995049	1920982	1162849	2.09918	1.65196	279341	188845	90496	128194	146992	2.08678	0.872115	14977157	6338265	8771088	10785596	3830143	0.722632	2.81598	3083781	2088783	995033	1920882
[truncated: 17 more columns]
