# Supplementary material for: Whole-genome long-read sequencing downsampling and its effect on variant-calling precision and recall
Source: Genome Res. 2023 Dec;33(12):2029–40. doi: 10.1101/gr.278070.123 (PMC10760522; doi:10.1101/gr.278070.123)
Supplement: Supplement 9 [file Supplemental_Table_S7.xlsx]

## Sheet: S7
S7 - indel (assembly-based)
SAMPLE	COVERAGE	SVTYPE	TECH	METRIC.Recall	METRIC.Precision	METRIC.F1_Score	CALLER	Filter	Genotype	QQ.Field	QQ	METRIC.Frac_NA	FP.gt	FP.al	Subset.Size	Subset.IS_CONF.Size	Subset.Level	TRUTH.TOTAL	TRUTH.TOTAL.ti	TRUTH.TOTAL.tv	TRUTH.TOTAL.het	TRUTH.TOTAL.homalt	TRUTH.TOTAL.TiTv_ratio	TRUTH.TOTAL.het_hom_ratio	TRUTH.TP	TRUTH.TP.ti	TRUTH.TP.tv	TRUTH.TP.het	TRUTH.TP.homalt	TRUTH.TP.TiTv_ratio	TRUTH.TP.het_hom_ratio	TRUTH.FN	TRUTH.FN.ti	TRUTH.FN.tv	TRUTH.FN.het	TRUTH.FN.homalt	TRUTH.FN.TiTv_ratio	TRUTH.FN.het_hom_ratio	QUERY.TOTAL	QUERY.TOTAL.ti	QUERY.TOTAL.tv	QUERY.TOTAL.het	QUERY.TOTAL.homalt	QUERY.TOTAL.TiTv_ratio	QUERY.TOTAL.het_hom_ratio	QUERY.TP	QUERY.TP.ti	QUERY.TP.tv	QUERY.TP.het
HG002	5	INDEL	ONT	0.295633	0.013302	0.025459	pav-flyehap_ont	ALL	*	QUAL	*	0.074207	71284	2205927	2809091522	2546949881	0	525466	.	.	296594	194071		1.52828	155345	.	.	48946	104143		0.469988	370121	.	.	247648	89928		2.75385	12621289	.	.	5941564	6417214		0.925879	155434	.	.	49185
HG002	5	INDEL	ONT	0.295633	0.013302	0.025459	pav-flyehap_ont	PASS	*	QUAL	*	0.074207	71284	2205927	2809091522	2546949881	0	525466	.	.	296594	194071		1.52828	155345	.	.	48946	104143		0.469988	370121	.	.	247648	89928		2.75385	12621289	.	.	5941564	6417214		0.925879	155434	.	.	49185
HG002	8	INDEL	ONT	0.450141	0.023895	0.045382	pav-flyehap_ont	ALL	*	QUAL	*	0.089689	58166	1683696	2809091522	2546949881	0	525466	.	.	296594	194071		1.52828	236534	.	.	114192	116438		0.980711	288932	.	.	182402	77633		2.34954	10890712	.	.	8392231	2097399		4.00126	236898	.	.	114828
HG002	8	INDEL	ONT	0.450141	0.023895	0.045382	pav-flyehap_ont	PASS	*	QUAL	*	0.089689	58166	1683696	2809091522	2546949881	0	525466	.	.	296594	194071		1.52828	236534	.	.	114192	116438		0.980711	288932	.	.	182402	77633		2.34954	10890712	.	.	8392231	2097399		4.00126	236898	.	.	114828
HG002	10	INDEL	ONT	0.513217	0.032273	0.060728	pav-flyehap_ont	ALL	*	QUAL	*	0.10028	46347	1406474	2809091522	2546949881	0	525466	.	.	296594	194071		1.52828	269678	.	.	144178	117809		1.22383	255788	.	.	152416	76262		1.99858	9302796	.	.	7710220	1187125		6.49487	270124	.	.	144965
HG002	10	INDEL	ONT	0.513217	0.032273	0.060728	pav-flyehap_ont	PASS	*	QUAL	*	0.10028	46347	1406474	2809091522	2546949881	0	525466	.	.	296594	194071		1.52828	269678	.	.	144178	117809		1.22383	255788	.	.	152416	76262		1.99858	9302796	.	.	7710220	1187125		6.49487	270124	.	.	144965
HG002	12	INDEL	ONT	0.551786	0.042682	0.079235	pav-flyehap_ont	ALL	*	QUAL	*	0.114195	38476	1135263	2809091522	2546949881	0	525466	.	.	296594	194071		1.52828	289945	.	.	162736	118223		1.37652	235521	.	.	133858	75848		1.76482	7679015	.	.	6445303	849264		7.58928	290326	.	.	163526
HG002	12	INDEL	ONT	0.551786	0.042682	0.079235	pav-flyehap_ont	PASS	*	QUAL	*	0.114195	38476	1135263	2809091522	2546949881	0	525466	.	.	296594	194071		1.52828	289945	.	.	162736	118223		1.37652	235521	.	.	133858	75848		1.76482	7679015	.	.	6445303	849264		7.58928	290326	.	.	163526
HG002	15	INDEL	ONT	0.551661	0.061514	0.110686	pav-flyehap_ont	ALL	*	QUAL	*	0.140595	30378	783872	2809091522	2546949881	0	525466	.	.	296594	194071		1.52828	289879	.	.	167810	112287		1.49447	235587	.	.	128784	81784		1.57468	5490202	.	.	4509457	648560		6.95303	290243	.	.	168633
HG002	15	INDEL	ONT	0.551661	0.061514	0.110686	pav-flyehap_ont	PASS	*	QUAL	*	0.140595	30378	783872	2809091522	2546949881	0	525466	.	.	296594	194071		1.52828	289879	.	.	167810	112287		1.49447	235587	.	.	128784	81784		1.57468	5490202	.	.	4509457	648560		6.95303	290243	.	.	168633
HG002	17	INDEL	ONT	0.615391	0.077767	0.138084	pav-flyehap_ont	ALL	*	QUAL	*	0.156991	29917	696751	2809091522	2546949881	0	525466	.	.	296594	194071		1.52828	323367	.	.	188263	123817		1.52049	202099	.	.	108331	70254		1.54199	4936776	.	.	3938296	663647		5.93432	323645	.	.	189115
HG002	17	INDEL	ONT	0.615391	0.077767	0.138084	pav-flyehap_ont	PASS	*	QUAL	*	0.156991	29917	696751	2809091522	2546949881	0	525466	.	.	296594	194071		1.52828	323367	.	.	188263	123817		1.52049	202099	.	.	108331	70254		1.54199	4936776	.	.	3938296	663647		5.93432	323645	.	.	189115
HG002	20	INDEL	ONT	0.628891	0.101944	0.175447	pav-flyehap_ont	ALL	*	QUAL	*	0.184248	30509	543525	2809091522	2546949881	0	525466	.	.	296594	194071		1.52828	330461	.	.	193404	125043		1.5467	195005	.	.	103190	69028		1.4949	3975519	.	.	3033913	635460		4.77436	330607	.	.	194164
HG002	20	INDEL	ONT	0.628891	0.101944	0.175447	pav-flyehap_ont	PASS	*	QUAL	*	0.184248	30509	543525	2809091522	2546949881	0	525466	.	.	296594	194071		1.52828	330461	.	.	193404	125043		1.5467	195005	.	.	103190	69028		1.4949	3975519	.	.	3033913	635460		4.77436	330607	.	.	194164
HG002	25	INDEL	ONT	0.638572	0.138726	0.227935	pav-flyehap_ont	ALL	*	QUAL	*	0.220596	31508	405793	2809091522	2546949881	0	525466	.	.	296594	194071		1.52828	335548	.	.	196949	125800		1.56557	189918	.	.	99645	68271		1.45955	3103306	.	.	2213032	617457		3.58411	335541	.	.	197599
HG002	25	INDEL	ONT	0.638572	0.138726	0.227935	pav-flyehap_ont	PASS	*	QUAL	*	0.220596	31508	405793	2809091522	2546949881	0	525466	.	.	296594	194071		1.52828	335548	.	.	196949	125800		1.56557	189918	.	.	99645	68271		1.45955	3103306	.	.	2213032	617457		3.58411	335541	.	.	197599
HG002	30	INDEL	ONT	0.666667	0.1708	0.271931	pav-flyehap_ont	ALL	*	QUAL	*	0.245002	26296	354177	2809091522	2546949881	0	525466	.	.	296594	194071		1.52828	350311	.	.	203493	133026		1.52972	175155	.	.	93101	61045		1.52512	2716634	.	.	1821381	635080		2.86796	350319	.	.	204217
HG002	30	INDEL	ONT	0.666667	0.1708	0.271931	pav-flyehap_ont	PASS	*	QUAL	*	0.245002	26296	354177	2809091522	2546949881	0	525466	.	.	296594	194071		1.52828	350311	.	.	203493	133026		1.52972	175155	.	.	93101	61045		1.52512	2716634	.	.	1821381	635080		2.86796	350319	.	.	204217
HG00733	5	INDEL	ONT	0.271515	0.008531	0.016541	pav-flyehap_ont	ALL	*	QUAL	*	0.113167	76070	3278194	3031399176	2546864659	0	524604	.	.	315538	208857		1.51078	142438	.	.	37307	105131		0.354862	382166	.	.	278231	103726		2.68237	18809922	.	.	8458313	10033113		0.84304	142300	.	.	36880
HG00733	5	INDEL	ONT	0.271515	0.008531	0.016541	pav-flyehap_ont	PASS	*	QUAL	*	0.113167	76070	3278194	3031399176	2546864659	0	524604	.	.	315538	208857		1.51078	142438	.	.	37307	105131		0.354862	382166	.	.	278231	103726		2.68237	18809922	.	.	8458313	10033113		0.84304	142300	.	.	36880
HG00733	8	INDEL	ONT	0.387687	0.013311	0.025738	pav-flyehap_ont	ALL	*	QUAL	*	0.118992	67840	2639813	3031399176	2546864659	0	524640	.	.	315538	208857		1.51078	203396	.	.	90792	112604		0.806295	321244	.	.	224746	96253		2.33495	17313679	.	.	13338867	3472684		3.84108	203034	.	.	89687
HG00733	8	INDEL	ONT	0.387687	0.013311	0.025738	pav-flyehap_ont	PASS	*	QUAL	*	0.118992	67840	2639813	3031399176	2546864659	0	524640	.	.	315538	208857		1.51078	203396	.	.	90792	112604		0.806295	321244	.	.	224746	96253		2.33495	17313679	.	.	13338867	3472684		3.84108	203034	.	.	89687
HG00733	10	INDEL	ONT	0.440066	0.016819	0.0324	pav-flyehap_ont	ALL	*	QUAL	*	0.123195	58228	2321208	3031399176	2546864659	0	524646	.	.	315538	208857		1.51078	230879	.	.	120521	110358		1.09209	293767	.	.	195017	98499		1.97989	15612458	.	.	13227344	1873413		7.06056	230240	.	.	118733
HG00733	10	INDEL	ONT	0.440066	0.016819	0.0324	pav-flyehap_ont	PASS	*	QUAL	*	0.123195	58228	2321208	3031399176	2546864659	0	524646	.	.	315538	208857		1.51078	230879	.	.	120521	110358		1.09209	293767	.	.	195017	98499		1.97989	15612458	.	.	13227344	1873413		7.06056	230240	.	.	118733
HG00733	12	INDEL	ONT	0.485687	0.021154	0.040541	pav-flyehap_ont	ALL	*	QUAL	*	0.13002	49370	2014500	3031399176	2546864659	0	524655	.	.	315538	208857		1.51078	254818	.	.	143718	111100		1.29359	269837	.	.	171820	97757		1.75762	13796632	.	.	12055306	1239624		9.72497	253902	.	.	141308
HG00733	12	INDEL	ONT	0.485687	0.021154	0.040541	pav-flyehap_ont	PASS	*	QUAL	*	0.13002	49370	2014500	3031399176	2546864659	0	524655	.	.	315538	208857		1.51078	254818	.	.	143718	111100		1.29359	269837	.	.	171820	97757		1.75762	13796632	.	.	12055306	1239624		9.72497	253902	.	.	141308
HG00733	15	INDEL	ONT	0.521068	0.029501	0.05584	pav-flyehap_ont	ALL	*	QUAL	*	0.142718	42799	1520630	3031399176	2546864659	0	524665	.	.	315538	208857		1.51078	273386	.	.	163454	109932		1.48686	251279	.	.	152084	98925		1.53737	10753984	.	.	9412664	887102		10.6106	271974	.	.	160012
HG00733	15	INDEL	ONT	0.521068	0.029501	0.05584	pav-flyehap_ont	PASS	*	QUAL	*	0.142718	42799	1520630	3031399176	2546864659	0	524665	.	.	315538	208857		1.51078	273386	.	.	163454	109932		1.48686	251279	.	.	152084	98925		1.53737	10753984	.	.	9412664	887102		10.6106	271974	.	.	160012
HG00733	17	INDEL	ONT	0.554745	0.036963	0.069308	pav-flyehap_ont	ALL	*	QUAL	*	0.151064	36523	1305264	3031399176	2546864659	0	524686	.	.	315538	208857		1.51078	291067	.	.	175052	116015		1.50887	233619	.	.	140486	92842		1.51317	9223761	.	.	7958162	827228		9.62028	289434	.	.	171120
HG00733	17	INDEL	ONT	0.554745	0.036963	0.069308	pav-flyehap_ont	PASS	*	QUAL	*	0.151064	36523	1305264	3031399176	2546864659	0	524686	.	.	315538	208857		1.51078	291067	.	.	175052	116015		1.50887	233619	.	.	140486	92842		1.51317	9223761	.	.	7958162	827228		9.62028	289434	.	.	171120
HG00733	20	INDEL	ONT	0.570231	0.050073	0.092061	pav-flyehap_ont	ALL	*	QUAL	*	0.169665	34344	988280	3031399176	2546864659	0	524700	.	.	315538	208857		1.51078	299200	.	.	182162	117038		1.55643	225500	.	.	133376	91819		1.4526	7149097	.	.	5987571	762107		7.8566	297239	.	.	177590
HG00733	20	INDEL	ONT	0.570231	0.050073	0.092061	pav-flyehap_ont	PASS	*	QUAL	*	0.169665	34344	988280	3031399176	2546864659	0	524700	.	.	315538	208857		1.51078	299200	.	.	182162	117038		1.55643	225500	.	.	133376	91819		1.4526	7149097	.	.	5987571	762107		7.8566	297239	.	.	177590
HG00733	25	INDEL	ONT	0.599569	0.075681	0.134398	pav-flyehap_ont	ALL	*	QUAL	*	0.199867	31731	693249	3031399176	2546864659	0	524714	.	.	315538	208857		1.51078	314602	.	.	192315	122287		1.57265	210112	.	.	123223	86570		1.42339	5154249	.	.	4045589	745861		5.42405	312115	.	.	186733
HG00733	25	INDEL	ONT	0.599569	0.075681	0.134398	pav-flyehap_ont	PASS	*	QUAL	*	0.199867	31731	693249	3031399176	2546864659	0	524714	.	.	315538	208857		1.51078	314602	.	.	192315	122287		1.57265	210112	.	.	123223	86570		1.42339	5154249	.	.	4045589	745861		5.42405	312115	.	.	186733
HG00733	30	INDEL	ONT	0.579635	0.101426	0.172642	pav-flyehap_ont	ALL	*	QUAL	*	0.232004	34096	493685	3031399176	2546864659	0	524711	.	.	315538	208857		1.51078	304141	.	.	188184	115957		1.62288	220570	.	.	127354	92900		1.37087	3869867	.	.	2878747	684435		4.20602	301441	.	.	182346
HG00733	30	INDEL	ONT	0.579635	0.101426	0.172642	pav-flyehap_ont	PASS	*	QUAL	*	0.232004	34096	493685	3031399176	2546864659	0	524711	.	.	315538	208857		1.51078	304141	.	.	188184	115957		1.62288	220570	.	.	127354	92900		1.37087	3869867	.	.	2878747	684435		4.20602	301441	.	.	182346
HG002	5	INDEL	UL-ONT	0.307698	0.009189	0.017845	pav-flyehap_ulont	ALL	*	QUAL	*	0.064167	75840	3443189	2809091522	2546949881	0	525466	.	.	296594	194071		1.52828	161685	.	.	50486	108852		0.463804	363781	.	.	246108	85219		2.88795	18814203	.	.	9599958	8861885		1.08329	161790	.	.	50695
HG002	5	INDEL	UL-ONT	0.307698	0.009189	0.017845	pav-flyehap_ulont	PASS	*	QUAL	*	0.064167	75840	3443189	2809091522	2546949881	0	525466	.	.	296594	194071		1.52828	161685	.	.	50486	108852		0.463804	363781	.	.	246108	85219		2.88795	18814203	.	.	9599958	8861885		1.08329	161790	.	.	50695
HG002	8	INDEL	UL-ONT	0.426486	0.015579	0.03006	pav-flyehap_ulont	ALL	*	QUAL	*	0.077314	59827	2474785	2809091522	2546949881	0	525466	.	.	296594	194071		1.52828	224104	.	.	107796	111197		0.969415	301362	.	.	188798	82874		2.27813	15610495	.	.	12547573	2594302		4.83659	224390	.	.	108280
HG002	8	INDEL	UL-ONT	0.426486	0.015579	0.03006	pav-flyehap_ulont	PASS	*	QUAL	*	0.077314	59827	2474785	2809091522	2546949881	0	525466	.	.	296594	194071		1.52828	224104	.	.	107796	111197		0.969415	301362	.	.	188798	82874		2.27813	15610495	.	.	12547573	2594302		4.83659	224390	.	.	108280
HG002	10	INDEL	UL-ONT	0.47558	0.020665	0.039608	pav-flyehap_ulont	ALL	*	QUAL	*	0.085235	47644	2032025	2809091522	2546949881	0	525466	.	.	296594	194071		1.52828	249901	.	.	133830	109434		1.22293	275565	.	.	162764	84637		1.92308	13241929	.	.	11442198	1339657		8.54114	250315	.	.	134486
HG002	10	INDEL	UL-ONT	0.47558	0.020665	0.039608	pav-flyehap_ulont	PASS	*	QUAL	*	0.085235	47644	2032025	2809091522	2546949881	0	525466	.	.	296594	194071		1.52828	249901	.	.	133830	109434		1.22293	275565	.	.	162764	84637		1.92308	13241929	.	.	11442198	1339657		8.54114	250315	.	.	134486
HG002	12	INDEL	UL-ONT	0.526567	0.027184	0.0517	pav-flyehap_ulont	ALL	*	QUAL	*	0.093344	40316	1695271	2809091522	2546949881	0	525466	.	.	296594	194071		1.52828	276693	.	.	156201	112471		1.38881	248773	.	.	140393	81600		1.7205	11242840	.	.	9892380	907337		10.9027	277100	.	.	156967
HG002	12	INDEL	UL-ONT	0.526567	0.027184	0.0517	pav-flyehap_ulont	PASS	*	QUAL	*	0.093344	40316	1695271	2809091522	2546949881	0	525466	.	.	296594	194071		1.52828	276693	.	.	156201	112471		1.38881	248773	.	.	140393	81600		1.7205	11242840	.	.	9892380	907337		10.9027	277100	.	.	156967
HG002	15	INDEL	UL-ONT	0.563163	0.038817	0.072627	pav-flyehap_ulont	ALL	*	QUAL	*	0.111249	33644	1264735	2809091522	2546949881	0	525466	.	.	296594	194071		1.52828	295923	.	.	172718	114053		1.51437	229543	.	.	123876	80018		1.5481	8590966	.	.	7497998	690537		10.8582	296374	.	.	173584
HG002	15	INDEL	UL-ONT	0.563163	0.038817	0.072627	pav-flyehap_ulont	PASS	*	QUAL	*	0.111249	33644	1264735	2809091522	2546949881	0	525466	.	.	296594	194071		1.52828	295923	.	.	172718	114053		1.51437	229543	.	.	123876	80018		1.5481	8590966	.	.	7497998	690537		10.8582	296374	.	.	173584
HG002	17	INDEL	UL-ONT	0.559694	0.051089	0.093632	pav-flyehap_ulont	ALL	*	QUAL	*	0.13052	33286	937863	2809091522	2546949881	0	525466	.	.	296594	194071		1.52828	294100	.	.	173910	110827		1.5692	231366	.	.	122684	83244		1.47379	6629589	.	.	5672861	603656		9.39751	294493	.	.	174720
HG002	17	INDEL	UL-ONT	0.559694	0.051089	0.093632	pav-flyehap_ulont	PASS	*	QUAL	*	0.13052	33286	937863	2809091522	2546949881	0	525466	.	.	296594	194071		1.52828	294100	.	.	173910	110827		1.5692	231366	.	.	122684	83244		1.47379	6629589	.	.	5672861	603656		9.39751	294493	.	.	174720
HG002	20	INDEL	UL-ONT	0.586948	0.06986	0.124859	pav-flyehap_ulont	ALL	*	QUAL	*	0.155459	32040	724014	2809091522	2546949881	0	525466	.	.	296594	194071		1.52828	308421	.	.	183326	114860		1.59608	217045	.	.	113268	79211		1.42995	5232340	.	.	4310696	588496		7.32494	308705	.	.	184126
HG002	20	INDEL	UL-ONT	0.586948	0.06986	0.124859	pav-flyehap_ulont	PASS	*	QUAL	*	0.155459	32040	724014	2809091522	2546949881	0	525466	.	.	296594	194071		1.52828	308421	.	.	183326	114860		1.59608	217045	.	.	113268	79211		1.42995	5232340	.	.	4310696	588496		7.32494	308705	.	.	184126
HG002	25	INDEL	UL-ONT	0.604519	0.101006	0.173091	pav-flyehap_ulont	ALL	*	QUAL	*	0.189125	29080	523711	2809091522	2546949881	0	525466	.	.	296594	194071		1.52828	317654	.	.	188544	118092		1.59659	207812	.	.	108050	75979		1.4221	3880908	.	.	3011001	570132		5.28123	317859	.	.	189334
HG002	25	INDEL	UL-ONT	0.604519	0.101006	0.173091	pav-flyehap_ulont	PASS	*	QUAL	*	0.189125	29080	523711	2809091522	2546949881	0	525466	.	.	296594	194071		1.52828	317654	.	.	188544	118092		1.59659	207812	.	.	108050	75979		1.4221	3880908	.	.	3011001	570132		5.28123	317859	.	.	189334
HG002	30	INDEL	UL-ONT	0.613336	0.126217	0.209351	pav-flyehap_ulont	ALL	*	QUAL	*	0.214263	30027	424401	2809091522	2546949881	0	525466	.	.	296594	194071		1.52828	322287	.	.	191149	119757		1.59614	203179	.	.	105445	74314		1.41891	3250694	.	.	2393126	580017		4.12596	322381	.	.	191857
HG002	30	INDEL	UL-ONT	0.613336	0.126217	0.209351	pav-flyehap_ulont	PASS	*	QUAL	*	0.214263	30027	424401	2809091522	2546949881	0	525466	.	.	296594	194071		1.52828	322287	.	.	191149	119757		1.59614	203179	.	.	105445	74314		1.41891	3250694	.	.	2393126	580017		4.12596	322381	.	.	191857
HG00733	5	INDEL	UL-ONT	0.307357	0.009927	0.019233	pav-flyehap_ulont	ALL	*	QUAL	*	0.114118	77862	3128131	3031399176	2546864659	0	524631	.	.	315538	208857		1.51078	161249	.	.	50646	110603		0.457908	363382	.	.	264892	98254		2.69599	18321621	.	.	8922134	9043667		0.986562	161123	.	.	50164
HG00733	5	INDEL	UL-ONT	0.307357	0.009927	0.019233	pav-flyehap_ulont	PASS	*	QUAL	*	0.114118	77862	3128131	3031399176	2546864659	0	524631	.	.	315538	208857		1.51078	161249	.	.	50646	110603		0.457908	363382	.	.	264892	98254		2.69599	18321621	.	.	8922134	9043667		0.986562	161123	.	.	50164
HG00733	8	INDEL	UL-ONT	0.429142	0.016663	0.032081	pav-flyehap_ulont	ALL	*	QUAL	*	0.125487	60020	2290359	3031399176	2546864659	0	524675	.	.	315538	208857		1.51078	225160	.	.	112261	112899		0.994349	299515	.	.	203277	95958		2.1184	15404810	.	.	12193837	2708967		4.50129	224481	.	.	110477
HG00733	8	INDEL	UL-ONT	0.429142	0.016663	0.032081	pav-flyehap_ulont	PASS	*	QUAL	*	0.125487	60020	2290359	3031399176	2546864659	0	524675	.	.	315538	208857		1.51078	225160	.	.	112261	112899		0.994349	299515	.	.	203277	95958		2.1184	15404810	.	.	12193837	2708967		4.50129	224481	.	.	110477
HG00733	10	INDEL	UL-ONT	0.470359	0.021619	0.041338	pav-flyehap_ulont	ALL	*	QUAL	*	0.135706	51984	1854687	3031399176	2546864659	0	524684	.	.	315538	208857		1.51078	246790	.	.	138260	108530		1.27393	277894	.	.	177278	100327		1.767	13156154	.	.	11270986	1394101		8.08477	245824	.	.	135816
HG00733	10	INDEL	UL-ONT	0.470359	0.021619	0.041338	pav-flyehap_ulont	PASS	*	QUAL	*	0.135706	51984	1854687	3031399176	2546864659	0	524684	.	.	315538	208857		1.51078	246790	.	.	138260	108530		1.27393	277894	.	.	177278	100327		1.767	13156154	.	.	11270986	1394101		8.08477	245824	.	.	135816
HG00733	12	INDEL	UL-ONT	0.512746	0.028277	0.053598	pav-flyehap_ulont	ALL	*	QUAL	*	0.143646	40156	1563586	3031399176	2546864659	0	524706	.	.	315538	208857		1.51078	269041	.	.	157236	111805		1.40634	255665	.	.	158302	97052		1.6311	11058413	.	.	9653983	925516		10.4309	267779	.	.	154112
HG00733	12	INDEL	UL-ONT	0.512746	0.028277	0.053598	pav-flyehap_ulont	PASS	*	QUAL	*	0.143646	40156	1563586	3031399176	2546864659	0	524706	.	.	315538	208857		1.51078	269041	.	.	157236	111805		1.40634	255665	.	.	158302	97052		1.6311	11058413	.	.	9653983	925516		10.4309	267779	.	.	154112
HG00733	15	INDEL	UL-ONT	0.559602	0.041234	0.076809	pav-flyehap_ulont	ALL	*	QUAL	*	0.162909	36604	1154189	3031399176	2546864659	0	524716	.	.	315538	208857		1.51078	293632	.	.	178688	114944		1.55457	231084	.	.	136850	93913		1.4572	8457337	.	.	7324051	689039		10.6294	291920	.	.	174649
HG00733	15	INDEL	UL-ONT	0.559602	0.041234	0.076809	pav-flyehap_ulont	PASS	*	QUAL	*	0.162909	36604	1154189	3031399176	2546864659	0	524716	.	.	315538	208857		1.51078	293632	.	.	178688	114944		1.55457	231084	.	.	136850	93913		1.4572	8457337	.	.	7324051	689039		10.6294	291920	.	.	174649
HG00733	17	INDEL	UL-ONT	0.553314	0.05242	0.095766	pav-flyehap_ulont	ALL	*	QUAL	*	0.182102	31801	906604	3031399176	2546864659	0	524729	.	.	315538	208857		1.51078	290340	.	.	178017	112323		1.58487	234389	.	.	137521	96534		1.42459	6729656	.	.	5708634	613466		9.30554	288526	.	.	173769
HG00733	17	INDEL	UL-ONT	0.553314	0.05242	0.095766	pav-flyehap_ulont	PASS	*	QUAL	*	0.182102	31801	906604	3031399176	2546864659	0	524729	.	.	315538	208857		1.51078	290340	.	.	178017	112323		1.58487	234389	.	.	137521	96534		1.42459	6729656	.	.	5708634	613466		9.30554	288526	.	.	173769
HG00733	20	INDEL	UL-ONT	0.596102	0.071587	0.127824	pav-flyehap_ulont	ALL	*	QUAL	*	0.200112	30265	722589	3031399176	2546864659	0	524729	.	.	315538	208857		1.51078	312792	.	.	191423	121369		1.5772	211937	.	.	124115	87488		1.41865	5422208	.	.	4411671	610601		7.22513	310486	.	.	186269
HG00733	20	INDEL	UL-ONT	0.596102	0.071587	0.127824	pav-flyehap_ulont	PASS	*	QUAL	*	0.200112	30265	722589	3031399176	2546864659	0	524729	.	.	315538	208857		1.51078	312792	.	.	191423	121369		1.5772	211937	.	.	124115	87488		1.41865	5422208	.	.	4411671	610601		7.22513	310486	.	.	186269
HG00733	25	INDEL	UL-ONT	0.608764	0.106812	0.181737	pav-flyehap_ulont	ALL	*	QUAL	*	0.239461	29977	506928	3031399176	2546864659	0	524739	.	.	315538	208857		1.51078	319442	.	.	196706	122736		1.60268	205297	.	.	118832	86121		1.37983	3900937	.	.	2951959	590655		4.99777	316891	.	.	191112
HG00733	25	INDEL	UL-ONT	0.608764	0.106812	0.181737	pav-flyehap_ulont	PASS	*	QUAL	*	0.239461	29977	506928	3031399176	2546864659	0	524739	.	.	315538	208857		1.51078	319442	.	.	196706	122736		1.60268	205297	.	.	118832	86121		1.37983	3900937	.	.	2951959	590655		4.99777	316891	.	.	191112
HG00733	30	INDEL	UL-ONT	0.617842	0.139621	0.22777	pav-flyehap_ulont	ALL	*	QUAL	*	0.266871	29412	401600	3031399176	2546864659	0	524736	.	.	315538	208857		1.51078	324204	.	.	199976	124228		1.60975	200532	.	.	115562	84629		1.36551	3140018	.	.	2229217	580351		3.84115	321413	.	.	193981
HG00733	30	INDEL	UL-ONT	0.617842	0.139621	0.22777	pav-flyehap_ulont	PASS	*	QUAL	*	0.266871	29412	401600	3031399176	2546864659	0	524736	.	.	315538	208857		1.51078	324204	.	.	199976	124228		1.60975	200532	.	.	115562	84629		1.36551	3140018	.	.	2229217	580351		3.84115	321413	.	.	193981
HG002	5	INDEL	HiFi	0.352021	0.077078	0.126466	pav-hifiasm	ALL	*	QUAL	*	0.14889	98186	393521	2809091522	2546949881	0	525466	.	.	296594	194071		1.52828	184975	.	.	97705	83771		1.16633	340491	.	.	198889	110300		1.80316	2816934	.	.	1973819	823274		2.39752	184797	.	.	97755
HG002	5	INDEL	HiFi	0.352021	0.077078	0.126466	pav-hifiasm	PASS	*	QUAL	*	0.14889	98186	393521	2809091522	2546949881	0	525466	.	.	296594	194071		1.52828	184975	.	.	97705	83771		1.16633	340491	.	.	198889	110300		1.80316	2816934	.	.	1973819	823274		2.39752	184797	.	.	97755
HG002	8	INDEL	HiFi	0.61038	0.142486	0.231039	pav-hifiasm	ALL	*	QUAL	*	0.187791	85156	367077	2809091522	2546949881	0	525466	.	.	296594	194071		1.52828	320734	.	.	194668	112312		1.73328	204732	.	.	101926	81759		1.24666	2768200	.	.	2357386	349841		6.73845	320359	.	.	195002
HG002	8	INDEL	HiFi	0.61038	0.142486	0.231039	pav-hifiasm	PASS	*	QUAL	*	0.187791	85156	367077	2809091522	2546949881	0	525466	.	.	296594	194071		1.52828	320734	.	.	194668	112312		1.73328	204732	.	.	101926	81759		1.24666	2768200	.	.	2357386	349841		6.73845	320359	.	.	195002
HG002	10	INDEL	HiFi	0.455053	0.213108	0.290276	pav-hifiasm	ALL	*	QUAL	*	0.269754	97274	172092	2809091522	2546949881	0	525466	.	.	296594	194071		1.52828	239115	.	.	54404	179720		0.302715	286351	.	.	242190	14351		16.8762	1534711	.	.	613680	897269		0.683942	238834	.	.	54496
HG002	10	INDEL	HiFi	0.455053	0.213108	0.290276	pav-hifiasm	PASS	*	QUAL	*	0.269754	97274	172092	2809091522	2546949881	0	525466	.	.	296594	194071		1.52828	239115	.	.	54404	179720		0.302715	286351	.	.	242190	14351		16.8762	1534711	.	.	613680	897269		0.683942	238834	.	.	54496
HG002	12	INDEL	HiFi	0.830516	0.33327	0.475665	pav-hifiasm	ALL	*	QUAL	*	0.279873	38570	170158	2809091522	2546949881	0	525466	.	.	296594	194071		1.52828	436408	.	.	254803	158051		1.61216	89058	.	.	41791	36020		1.16022	1815917	.	.	1435024	296706		4.83652	435814	.	.	255401
HG002	12	INDEL	HiFi	0.830516	0.33327	0.475665	pav-hifiasm	PASS	*	QUAL	*	0.279873	38570	170158	2809091522	2546949881	0	525466	.	.	296594	194071		1.52828	436408	.	.	254803	158051		1.61216	89058	.	.	41791	36020		1.16022	1815917	.	.	1435024	296706		4.83652	435814	.	.	255401
HG002	15	INDEL	HiFi	0.903248	0.544488	0.679416	pav-hifiasm	ALL	*	QUAL	*	0.358448	19781	82009	2809091522	2546949881	0	525466	.	.	296594	194071		1.52828	474626	.	.	270884	176833		1.53186	50840	.	.	25710	17238		1.49147	1356921	.	.	953619	316846		3.00972	473996	.	.	271621
HG002	15	INDEL	HiFi	0.903248	0.544488	0.679416	pav-hifiasm	PASS	*	QUAL	*	0.358448	19781	82009	2809091522	2546949881	0	525466	.	.	296594	194071		1.52828	474626	.	.	270884	176833		1.53186	50840	.	.	25710	17238		1.49147	1356921	.	.	953619	316846		3.00972	473996	.	.	271621
HG002	17	INDEL	HiFi	0.931423	0.682465	0.787742	pav-hifiasm	ALL	*	QUAL	*	0.399721	13947	50024	2809091522	2546949881	0	525466	.	.	296594	194071		1.52828	489431	.	.	278652	182330		1.52828	36035	.	.	17942	11741		1.52815	1193091	.	.	784558	321231		2.44235	488773	.	.	279427
HG002	17	INDEL	HiFi	0.931423	0.682465	0.787742	pav-hifiasm	PASS	*	QUAL	*	0.399721	13947	50024	2809091522	2546949881	0	525466	.	.	296594	194071		1.52828	489431	.	.	278652	182330		1.52828	36035	.	.	17942	11741		1.52815	1193091	.	.	784558	321231		2.44235	488773	.	.	279427
HG002	20	INDEL	HiFi	0.947846	0.819525	0.879027	pav-hifiasm	ALL	*	QUAL	*	0.435098	10265	26472	2809091522	2546949881	0	525466	.	.	296594	194071		1.52828	498061	.	.	282537	185952		1.51941	27405	.	.	14057	8119		1.73137	1074258	.	.	664070	323962		2.04984	497329	.	.	283296
HG002	20	INDEL	HiFi	0.947846	0.819525	0.879027	pav-hifiasm	PASS	*	QUAL	*	0.435098	10265	26472	2809091522	2546949881	0	525466	.	.	296594	194071		1.52828	498061	.	.	282537	185952		1.51941	27405	.	.	14057	8119		1.73137	1074258	.	.	664070	323962		2.04984	497329	.	.	283296
HG002	25	INDEL	HiFi	0.906184	0.89882	0.902487	pav-hifiasm	ALL	*	QUAL	*	0.456627	18794	11445	2809091522	2546949881	0	525466	.	.	296594	194071		1.52828	476169	.	.	272660	175729		1.55159	49297	.	.	23934	18342		1.30487	973620	.	.	589258	306440		1.92291	475511	.	.	273382
HG002	25	INDEL	HiFi	0.906184	0.89882	0.902487	pav-hifiasm	PASS	*	QUAL	*	0.456627	18794	11445	2809091522	2546949881	0	525466	.	.	296594	194071		1.52828	476169	.	.	272660	175729		1.55159	49297	.	.	23934	18342		1.30487	973620	.	.	589258	306440		1.92291	475511	.	.	273382
HG002	30	INDEL	HiFi	0.878127	0.916966	0.897127	pav-hifiasm	ALL	*	QUAL	*	0.461497	22749	7102	2809091522	2546949881	0	525466	.	.	296594	194071		1.52828	461426	.	.	265806	168392		1.5785	64040	.	.	30788	25679		1.19896	933134	.	.	567244	292112		1.94187	460771	.	.	266485
HG002	30	INDEL	HiFi	0.878127	0.916966	0.897127	pav-hifiasm	PASS	*	QUAL	*	0.461497	22749	7102	2809091522	2546949881	0	525466	.	.	296594	194071		1.52828	461426	.	.	265806	168392		1.5785	64040	.	.	30788	25679		1.19896	933134	.	.	567244	292112		1.94187	460771	.	.	266485
HG00733	5	INDEL	HiFi	0.314483	0.066115	0.10926	pav-hifiasm	ALL	*	QUAL	*	0.179713	102076	381964	3031399176	2546864659	0	524683	.	.	315538	208857		1.51078	165004	.	.	93438	71566		1.30562	359679	.	.	222100	137291		1.61773	3027791	.	.	2186613	822859		2.65734	164207	.	.	91825
HG00733	5	INDEL	HiFi	0.314483	0.066115	0.10926	pav-hifiasm	PASS	*	QUAL	*	0.179713	102076	381964	3031399176	2546864659	0	524683	.	.	315538	208857		1.51078	165004	.	.	93438	71566		1.30562	359679	.	.	222100	137291		1.61773	3027791	.	.	2186613	822859		2.65734	164207	.	.	91825
HG00733	8	INDEL	HiFi	0.570991	0.119182	0.197202	pav-hifiasm	ALL	*	QUAL	*	0.207179	89788	408492	3031399176	2546864659	0	524718	.	.	315538	208857		1.51078	299609	.	.	194059	105550		1.83855	225109	.	.	121479	103307		1.1759	3133423	.	.	2698546	370274		7.28797	296077	.	.	186953
HG00733	8	INDEL	HiFi	0.570991	0.119182	0.197202	pav-hifiasm	PASS	*	QUAL	*	0.207179	89788	408492	3031399176	2546864659	0	524718	.	.	315538	208857		1.51078	299609	.	.	194059	105550		1.83855	225109	.	.	121479	103307		1.1759	3133423	.	.	2698546	370274		7.28797	296077	.	.	186953
HG00733	10	INDEL	HiFi	0.693451	0.185298	0.29245	pav-hifiasm	ALL	*	QUAL	*	0.242143	56904	307791	3031399176	2546864659	0	524761	.	.	315538	208857		1.51078	363896	.	.	218893	145003		1.50958	160865	.	.	96645	63854		1.51353	2555766	.	.	2091423	384999		5.43228	358905	.	.	208880
HG00733	10	INDEL	HiFi	0.693451	0.185298	0.29245	pav-hifiasm	PASS	*	QUAL	*	0.242143	56904	307791	3031399176	2546864659	0	524761	.	.	315538	208857		1.51078	363896	.	.	218893	145003		1.50958	160865	.	.	96645	63854		1.51353	2555766	.	.	2091423	384999		5.43228	358905	.	.	208880
HG00733	12	INDEL	HiFi	0.76687	0.27363	0.403342	pav-hifiasm	ALL	*	QUAL	*	0.285086	38397	216394	3031399176	2546864659	0	524777	.	.	315538	208857		1.51078	402436	.	.	241262	161174		1.4969	122341	.	.	74276	47683		1.5577	2026659	.	.	1576853	362290		4.35246	396459	.	.	229265
HG00733	12	INDEL	HiFi	0.76687	0.27363	0.403342	pav-hifiasm	PASS	*	QUAL	*	0.285086	38397	216394	3031399176	2546864659	0	524777	.	.	315538	208857		1.51078	402436	.	.	241262	161174		1.4969	122341	.	.	74276	47683		1.5577	2026659	.	.	1576853	362290		4.35246	396459	.	.	229265
HG00733	15	INDEL	HiFi	0.840972	0.446132	0.58299	pav-hifiasm	ALL	*	QUAL	*	0.354228	24815	123101	3031399176	2546864659	0	524782	.	.	315538	208857		1.51078	441327	.	.	272226	169101		1.60984	83455	.	.	43312	39756		1.08945	1506635	.	.	1080828	331953		3.25597	434061	.	.	257676
HG00733	15	INDEL	HiFi	0.840972	0.446132	0.58299	pav-hifiasm	PASS	*	QUAL	*	0.354228	24815	123101	3031399176	2546864659	0	524782	.	.	315538	208857		1.51078	441327	.	.	272226	169101		1.60984	83455	.	.	43312	39756		1.08945	1506635	.	.	1080828	331953		3.25597	434061	.	.	257676
HG00733	17	INDEL	HiFi	0.861872	0.563982	0.681809	pav-hifiasm	ALL	*	QUAL	*	0.393173	19390	89165	3031399176	2546864659	0	524781	.	.	315538	208857		1.51078	452294	.	.	278503	173791		1.60252	72487	.	.	37035	35066		1.05615	1299512	.	.	870482	334783		2.60014	444744	.	.	263388
HG00733	17	INDEL	HiFi	0.861872	0.563982	0.681809	pav-hifiasm	PASS	*	QUAL	*	0.393173	19390	89165	3031399176	2546864659	0	524781	.	.	315538	208857		1.51078	452294	.	.	278503	173791		1.60252	72487	.	.	37035	35066		1.05615	1299512	.	.	870482	334783		2.60014	444744	.	.	263388
HG00733	20	INDEL	HiFi	0.873019	0.693452	0.772943	pav-hifiasm	ALL	*	QUAL	*	0.430872	17542	61774	3031399176	2546864659	0	524786	.	.	315538	208857		1.51078	458148	.	.	282457	175691		1.60769	66638	.	.	33081	33166		0.997437	1141232	.	.	713567	334984		2.13015	450402	.	.	266958
HG00733	20	INDEL	HiFi	0.873019	0.693452	0.772943	pav-hifiasm	PASS	*	QUAL	*	0.430872	17542	61774	3031399176	2546864659	0	524786	.	.	315538	208857		1.51078	458148	.	.	282457	175691		1.60769	66638	.	.	33081	33166		0.997437	1141232	.	.	713567	334984		2.13015	450402	.	.	266958
HG00733	25	INDEL	HiFi	0.879873	0.783994	0.829171	pav-hifiasm	ALL	*	QUAL	*	0.450221	15084	46969	3031399176	2546864659	0	524787	.	.	315538	208857		1.51078	461746	.	.	283452	178294		1.5898	63041	.	.	32086	30563		1.04983	1053247	.	.	625989	338045		1.85179	453974	.	.	267902
HG00733	25	INDEL	HiFi	0.879873	0.783994	0.829171	pav-hifiasm	PASS	*	QUAL	*	0.450221	15084	46969	3031399176	2546864659	0	524787	.	.	315538	208857		1.51078	461746	.	.	283452	178294		1.5898	63041	.	.	32086	30563		1.04983	1053247	.	.	625989	338045		1.85179	453974	.	.	267902
HG00733	30	INDEL	HiFi	0.813309	0.777876	0.795198	pav-hifiasm	ALL	*	QUAL	*	0.455569	31155	39300	3031399176	2546864659	0	524771	.	.	315538	208857		1.51078	426801	.	.	267856	158945		1.68521	97970	.	.	47682	49912		0.955321	991176	.	.	610404	301878		2.02202	419763	.	.	253781
HG00733	30	INDEL	HiFi	0.813309	0.777876	0.795198	pav-hifiasm	PASS	*	QUAL	*	0.455569	31155	39300	3031399176	2546864659	0	524771	.	.	315538	208857		1.51078	426801	.	.	267856	158945		1.68521	97970	.	.	47682	49912		0.955321	991176	.	.	610404	301878		2.02202	419763	.	.	253781
HG002	5	INDEL	HiFi	0.332067	0.073478	0.120331	pav-hifiasmtrio	ALL	*	QUAL	*	0.149837	104187	384982	2809091522	2546949881	0	525466	.	.	296594	194071		1.52828	174490	.	.	103980	67123		1.5491	350976	.	.	192614	126948		1.51727	2790731	.	.	2206809	564122		3.91194	174333	.	.	104026
HG002	5	INDEL	HiFi	0.332067	0.073478	0.120331	pav-hifiasmtrio	PASS	*	QUAL	*	0.149837	104187	384982	2809091522	2546949881	0	525466	.	.	296594	194071		1.52828	174490	.	.	103980	67123		1.5491	350976	.	.	192614	126948		1.51727	2790731	.	.	2206809	564122		3.91194	174333	.	.	104026
HG002	8	INDEL	HiFi	0.622303	0.142726	0.232197	pav-hifiasmtrio	ALL	*	QUAL	*	0.187247	80251	375712	2809091522	2546949881	0	525466	.	.	296594	194071		1.52828	326999	.	.	193671	119380		1.62231	198467	.	.	102923	74691		1.37798	2815703	.	.	2379620	373587		6.36965	326624	.	.	194037
HG002	8	INDEL	HiFi	0.622303	0.142726	0.232197	pav-hifiasmtrio	PASS	*	QUAL	*	0.187247	80251	375712	2809091522	2546949881	0	525466	.	.	296594	194071		1.52828	326999	.	.	193671	119380		1.62231	198467	.	.	102923	74691		1.37798	2815703	.	.	2379620	373587		6.36965	326624	.	.	194037
HG002	10	INDEL	HiFi	0.532912	0.213968	0.305339	pav-hifiasmtrio	ALL	*	QUAL	*	0.255717	85187	200587	2809091522	2546949881	0	525466	.	.	296594	194071		1.52828	280027	.	.	96904	174498		0.55533	245439	.	.	199690	19573		10.2023	1756200	.	.	980467	737056		1.33025	279679	.	.	97072
HG002	10	INDEL	HiFi	0.532912	0.213968	0.305339	pav-hifiasmtrio	PASS	*	QUAL	*	0.255717	85187	200587	2809091522	2546949881	0	525466	.	.	296594	194071		1.52828	280027	.	.	96904	174498		0.55533	245439	.	.	199690	19573		10.2023	1756200	.	.	980467	737056		1.33025	279679	.	.	97072
HG002	12	INDEL	HiFi	0.841933	0.335346	0.479646	pav-hifiasmtrio	ALL	*	QUAL	*	0.27849	30046	174133	2809091522	2546949881	0	525466	.	.	296594	194071		1.52828	442407	.	.	252949	165887		1.52483	83059	.	.	43645	28184		1.54857	1825951	.	.	1425094	316435		4.50359	441798	.	.	253549
HG002	12	INDEL	HiFi	0.841933	0.335346	0.479646	pav-hifiasmtrio	PASS	*	QUAL	*	0.27849	30046	174133	2809091522	2546949881	0	525466	.	.	296594	194071		1.52828	442407	.	.	252949	165887		1.52483	83059	.	.	43645	28184		1.54857	1825951	.	.	1425094	316435		4.50359	441798	.	.	253549
HG002	15	INDEL	HiFi	0.923392	0.545622	0.685933	pav-hifiasmtrio	ALL	*	QUAL	*	0.357172	13049	85525	2809091522	2546949881	0	525466	.	.	296594	194071		1.52828	485211	.	.	274355	183338		1.49644	40255	.	.	22239	10733		2.07202	1381479	.	.	963481	329459		2.92443	484541	.	.	275087
HG002	15	INDEL	HiFi	0.923392	0.545622	0.685933	pav-hifiasmtrio	PASS	*	QUAL	*	0.357172	13049	85525	2809091522	2546949881	0	525466	.	.	296594	194071		1.52828	485211	.	.	274355	183338		1.49644	40255	.	.	22239	10733		2.07202	1381479	.	.	963481	329459		2.92443	484541	.	.	275087
HG002	17	INDEL	HiFi	0.942818	0.684305	0.793026	pav-hifiasmtrio	ALL	*	QUAL	*	0.398978	9492	50927	2809091522	2546949881	0	525466	.	.	296594	194071		1.52828	495419	.	.	279656	187109		1.49462	30047	.	.	16938	6962		2.43292	1202937	.	.	784531	330384		2.3746	494747	.	.	280434
HG002	17	INDEL	HiFi	0.942818	0.684305	0.793026	pav-hifiasmtrio	PASS	*	QUAL	*	0.398978	9492	50927	2809091522	2546949881	0	525466	.	.	296594	194071		1.52828	495419	.	.	279656	187109		1.49462	30047	.	.	16938	6962		2.43292	1202937	.	.	784531	330384		2.3746	494747	.	.	280434
HG002	20	INDEL	HiFi	0.95861	0.824247	0.886365	pav-hifiasmtrio	ALL	*	QUAL	*	0.43517	6108	26909	2809091522	2546949881	0	525466	.	.	296594	194071		1.52828	503717	.	.	283624	190325		1.49021	21749	.	.	12970	3746		3.46236	1080420	.	.	660958	332584		1.98734	503000	.	.	284401
HG002	20	INDEL	HiFi	0.95861	0.824247	0.886365	pav-hifiasmtrio	PASS	*	QUAL	*	0.43517	6108	26909	2809091522	2546949881	0	525466	.	.	296594	194071		1.52828	503717	.	.	283624	190325		1.49021	21749	.	.	12970	3746		3.46236	1080420	.	.	660958	332584		1.98734	503000	.	.	284401
HG002	25	INDEL	HiFi	0.948802	0.918151	0.933225	pav-hifiasmtrio	ALL	*	QUAL	*	0.457264	10234	11986	2809091522	2546949881	0	525466	.	.	296594	194071		1.52828	498563	.	.	283137	185786		1.524	26903	.	.	13457	8285		1.62426	999135	.	.	593943	322259		1.84306	497883	.	.	283930
HG002	25	INDEL	HiFi	0.948802	0.918151	0.933225	pav-hifiasmtrio	PASS	*	QUAL	*	0.457264	10234	11986	2809091522	2546949881	0	525466	.	.	296594	194071		1.52828	498563	.	.	283137	185786		1.524	26903	.	.	13457	8285		1.62426	999135	.	.	593943	322259		1.84306	497883	.	.	283930
HG002	30	INDEL	HiFi	0.924697	0.931809	0.928239	pav-hifiasmtrio	ALL	*	QUAL	*	0.460867	16734	7356	2809091522	2546949881	0	525466	.	.	296594	194071		1.52828	485897	.	.	278316	178580		1.55849	39569	.	.	18278	15491		1.17991	965886	.	.	579597	308030		1.88163	485231	.	.	279072
HG002	30	INDEL	HiFi	0.924697	0.931809	0.928239	pav-hifiasmtrio	PASS	*	QUAL	*	0.460867	16734	7356	2809091522	2546949881	0	525466	.	.	296594	194071		1.52828	485897	.	.	278316	178580		1.55849	39569	.	.	18278	15491		1.17991	965886	.	.	579597	308030		1.88163	485231	.	.	279072
HG00733	5	INDEL	HiFi	0.307097	0.064855	0.107093	pav-hifiasmtrio	ALL	*	QUAL	*	0.1813	102370	385050	3031399176	2546864659	0	524695	.	.	315538	208857		1.51078	161132	.	.	101163	59969		1.68692	363563	.	.	214375	148888		1.43984	3019406	.	.	2401665	598713		4.01138	160321	.	.	99530
HG00733	5	INDEL	HiFi	0.307097	0.064855	0.107093	pav-hifiasmtrio	PASS	*	QUAL	*	0.1813	102370	385050	3031399176	2546864659	0	524695	.	.	315538	208857		1.51078	161132	.	.	101163	59969		1.68692	363563	.	.	214375	148888		1.43984	3019406	.	.	2401665	598713		4.01138	160321	.	.	99530
HG00733	8	INDEL	HiFi	0.580859	0.118707	0.197128	pav-hifiasmtrio	ALL	*	QUAL	*	0.20686	85123	417541	3031399176	2546864659	0	524714	.	.	315538	208857		1.51078	304785	.	.	192120	112665		1.70523	219929	.	.	123418	96192		1.28304	3199165	.	.	2736971	396228		6.90757	301205	.	.	184916
HG00733	8	INDEL	HiFi	0.580859	0.118707	0.197128	pav-hifiasmtrio	PASS	*	QUAL	*	0.20686	85123	417541	3031399176	2546864659	0	524714	.	.	315538	208857		1.51078	304785	.	.	192120	112665		1.70523	219929	.	.	123418	96192		1.28304	3199165	.	.	2736971	396228		6.90757	301205	.	.	184916
HG00733	10	INDEL	HiFi	0.72624	0.183949	0.293546	pav-hifiasmtrio	ALL	*	QUAL	*	0.238616	50329	326866	3031399176	2546864659	0	524774	.	.	315538	208857		1.51078	381112	.	.	232786	148326		1.56942	143662	.	.	82752	60531		1.3671	2682679	.	.	2228576	368300		6.05098	375724	.	.	221978
HG00733	10	INDEL	HiFi	0.72624	0.183949	0.293546	pav-hifiasmtrio	PASS	*	QUAL	*	0.238616	50329	326866	3031399176	2546864659	0	524774	.	.	315538	208857		1.51078	381112	.	.	232786	148326		1.56942	143662	.	.	82752	60531		1.3671	2682679	.	.	2228576	368300		6.05098	375724	.	.	221978
HG00733	12	INDEL	HiFi	0.804954	0.272908	0.407619	pav-hifiasmtrio	ALL	*	QUAL	*	0.280263	31771	228634	3031399176	2546864659	0	524778	.	.	315538	208857		1.51078	422422	.	.	259229	163193		1.58848	102356	.	.	56309	45664		1.23312	2117222	.	.	1683223	339596		4.95655	415869	.	.	246075
HG00733	12	INDEL	HiFi	0.804954	0.272908	0.407619	pav-hifiasmtrio	PASS	*	QUAL	*	0.280263	31771	228634	3031399176	2546864659	0	524778	.	.	315538	208857		1.51078	422422	.	.	259229	163193		1.58848	102356	.	.	56309	45664		1.23312	2117222	.	.	1683223	339596		4.95655	415869	.	.	246075
HG00733	15	INDEL	HiFi	0.858484	0.449094	0.589701	pav-hifiasmtrio	ALL	*	QUAL	*	0.352204	19484	126426	3031399176	2546864659	0	524781	.	.	315538	208857		1.51078	450516	.	.	275189	175327		1.56958	74265	.	.	40349	33530		1.20337	1522937	.	.	1081569	345287		3.13238	443055	.	.	260254
HG00733	15	INDEL	HiFi	0.858484	0.449094	0.589701	pav-hifiasmtrio	PASS	*	QUAL	*	0.352204	19484	126426	3031399176	2546864659	0	524781	.	.	315538	208857		1.51078	450516	.	.	275189	175327		1.56958	74265	.	.	40349	33530		1.20337	1522937	.	.	1081569	345287		3.13238	443055	.	.	260254
HG00733	17	INDEL	HiFi	0.865341	0.564569	0.683322	pav-hifiasmtrio	ALL	*	QUAL	*	0.391221	17124	89756	3031399176	2546864659	0	524786	.	.	315538	208857		1.51078	454119	.	.	277201	176918		1.56683	70667	.	.	38337	31939		1.20032	1299288	.	.	862858	342479		2.51945	446562	.	.	262072
HG00733	17	INDEL	HiFi	0.865341	0.564569	0.683322	pav-hifiasmtrio	PASS	*	QUAL	*	0.391221	17124	89756	3031399176	2546864659	0	524786	.	.	315538	208857		1.51078	454119	.	.	277201	176918		1.56683	70667	.	.	38337	31939		1.20032	1299288	.	.	862858	342479		2.51945	446562	.	.	262072
HG00733	20	INDEL	HiFi	0.886661	0.700464	0.782641	pav-hifiasmtrio	ALL	*	QUAL	*	0.430132	12357	62247	3031399176	2546864659	0	524788	.	.	315538	208857		1.51078	465309	.	.	283617	181692		1.56098	59479	.	.	31921	27165		1.17508	1146091	.	.	704677	347871		2.02568	457488	.	.	267967
HG00733	20	INDEL	HiFi	0.886661	0.700464	0.782641	pav-hifiasmtrio	PASS	*	QUAL	*	0.430132	12357	62247	3031399176	2546864659	0	524788	.	.	315538	208857		1.51078	465309	.	.	283617	181692		1.56098	59479	.	.	31921	27165		1.17508	1146091	.	.	704677	347871		2.02568	457488	.	.	267967
HG00733	25	INDEL	HiFi	0.879886	0.784572	0.8295	pav-hifiasmtrio	ALL	*	QUAL	*	0.449248	15207	46593	3031399176	2546864659	0	524786	.	.	315538	208857		1.51078	461752	.	.	283599	178153		1.59188	63034	.	.	31939	30704		1.04022	1050524	.	.	625566	335709		1.86342	453936	.	.	267963
HG00733	25	INDEL	HiFi	0.879886	0.784572	0.8295	pav-hifiasmtrio	PASS	*	QUAL	*	0.449248	15207	46593	3031399176	2546864659	0	524786	.	.	315538	208857		1.51078	461752	.	.	283599	178153		1.59188	63034	.	.	31939	30704		1.04022	1050524	.	.	625566	335709		1.86342	453936	.	.	267963
HG00733	30	INDEL	HiFi	0.867856	0.804694	0.835082	pav-hifiasmtrio	ALL	*	QUAL	*	0.454481	17325	42145	3031399176	2546864659	0	524784	.	.	315538	208857		1.51078	455437	.	.	280901	174536		1.60942	69347	.	.	34637	34321		1.00921	1019925	.	.	607101	326925		1.857	447722	.	.	265471
HG00733	30	INDEL	HiFi	0.867856	0.804694	0.835082	pav-hifiasmtrio	PASS	*	QUAL	*	0.454481	17325	42145	3031399176	2546864659	0	524784	.	.	315538	208857		1.51078	455437	.	.	280901	174536		1.60942	69347	.	.	34637	34321		1.00921	1019925	.	.	607101	326925		1.857	447722	.	.	265471
HG002	5	INDEL	HiFi	0.189675	0.07572	0.108232	pav-pgas	ALL	*	QUAL	*	0.144586	59278	206963	2809091522	2546949881	0	525466	.	.	296594	194071		1.52828	99668	.	.	54658	42939		1.27292	425798	.	.	241936	151132		1.60083	1537490	.	.	1162927	363598		3.19839	99586	.	.	54690
HG002	5	INDEL	HiFi	0.189675	0.07572	0.108232	pav-pgas	PASS	*	QUAL	*	0.144586	59278	206963	2809091522	2546949881	0	525466	.	.	296594	194071		1.52828	99668	.	.	54658	42939		1.27292	425798	.	.	241936	151132		1.60083	1537490	.	.	1162927	363598		3.19839	99586	.	.	54690
HG002	8	INDEL	HiFi	0.543299	0.146234	0.230442	pav-pgas	ALL	*	QUAL	*	0.183662	61781	312497	2809091522	2546949881	0	525466	.	.	296594	194071		1.52828	285485	.	.	164353	109411		1.50216	239981	.	.	132241	84660		1.56202	2388573	.	.	2010869	325326		6.18109	285139	.	.	164632
HG002	8	INDEL	HiFi	0.543299	0.146234	0.230442	pav-pgas	PASS	*	QUAL	*	0.183662	61781	312497	2809091522	2546949881	0	525466	.	.	296594	194071		1.52828	285485	.	.	164353	109411		1.50216	239981	.	.	132241	84660		1.56202	2388573	.	.	2010869	325326		6.18109	285139	.	.	164632
HG002	10	INDEL	HiFi	0.534073	0.21293	0.30447	pav-pgas	ALL	*	QUAL	*	0.249531	75924	201047	2809091522	2546949881	0	525466	.	.	296594	194071		1.52828	280637	.	.	109133	162134		0.673104	244829	.	.	187461	31937		5.86971	1754074	.	.	1077667	635347		1.69619	280296	.	.	109340
HG002	10	INDEL	HiFi	0.534073	0.21293	0.30447	pav-pgas	PASS	*	QUAL	*	0.249531	75924	201047	2809091522	2546949881	0	525466	.	.	296594	194071		1.52828	280637	.	.	109133	162134		0.673104	244829	.	.	187461	31937		5.86971	1754074	.	.	1077667	635347		1.69619	280296	.	.	109340
HG002	12	INDEL	HiFi	0.855315	0.337597	0.484113	pav-pgas	ALL	*	QUAL	*	0.277795	26243	174290	2809091522	2546949881	0	525466	.	.	296594	194071		1.52828	449439	.	.	252830	172832		1.46287	76027	.	.	43764	21239		2.06055	1840905	.	.	1412399	343607		4.11051	448839	.	.	253445
HG002	12	INDEL	HiFi	0.855315	0.337597	0.484113	pav-pgas	PASS	*	QUAL	*	0.277795	26243	174290	2809091522	2546949881	0	525466	.	.	296594	194071		1.52828	449439	.	.	252830	172832		1.46287	76027	.	.	43764	21239		2.06055	1840905	.	.	1412399	343607		4.11051	448839	.	.	253445
HG002	15	INDEL	HiFi	0.919255	0.544577	0.683965	pav-pgas	ALL	*	QUAL	*	0.357183	13546	85107	2809091522	2546949881	0	525466	.	.	296594	194071		1.52828	483037	.	.	272436	183411		1.48539	42429	.	.	24158	10660		2.26623	1377999	.	.	956773	333582		2.86818	482387	.	.	273164
HG002	15	INDEL	HiFi	0.919255	0.544577	0.683965	pav-pgas	PASS	*	QUAL	*	0.357183	13546	85107	2809091522	2546949881	0	525466	.	.	296594	194071		1.52828	483037	.	.	272436	183411		1.48539	42429	.	.	24158	10660		2.26623	1377999	.	.	956773	333582		2.86818	482387	.	.	273164
HG002	17	INDEL	HiFi	0.947186	0.684843	0.794929	pav-pgas	ALL	*	QUAL	*	0.398851	7979	51539	2809091522	2546949881	0	525466	.	.	296594	194071		1.52828	497714	.	.	280261	188672		1.48544	27752	.	.	16333	5399		3.02519	1207288	.	.	782754	336288		2.32763	497032	.	.	281037
HG002	17	INDEL	HiFi	0.947186	0.684843	0.794929	pav-pgas	PASS	*	QUAL	*	0.398851	7979	51539	2809091522	2546949881	0	525466	.	.	296594	194071		1.52828	497714	.	.	280261	188672		1.48544	27752	.	.	16333	5399		3.02519	1207288	.	.	782754	336288		2.32763	497032	.	.	281037
HG002	20	INDEL	HiFi	0.959997	0.82421	0.886937	pav-pgas	ALL	*	QUAL	*	0.436113	5640	27145	2809091522	2546949881	0	525466	.	.	296594	194071		1.52828	504446	.	.	283992	190653		1.48958	21020	.	.	12602	3418		3.68695	1083847	.	.	661106	335633		1.96973	503730	.	.	284766
HG002	20	INDEL	HiFi	0.959997	0.82421	0.886937	pav-pgas	PASS	*	QUAL	*	0.436113	5640	27145	2809091522	2546949881	0	525466	.	.	296594	194071		1.52828	504446	.	.	283992	190653		1.48958	21020	.	.	12602	3418		3.68695	1083847	.	.	661106	335633		1.96973	503730	.	.	284766
HG002	25	INDEL	HiFi	0.934184	0.909645	0.921751	pav-pgas	ALL	*	QUAL	*	0.456712	13722	11950	2809091522	2546949881	0	525466	.	.	296594	194071		1.52828	490882	.	.	279696	182189		1.5352	34584	.	.	16898	11882		1.42215	991935	.	.	592516	318205		1.86206	490213	.	.	280459
HG002	25	INDEL	HiFi	0.934184	0.909645	0.921751	pav-pgas	PASS	*	QUAL	*	0.456712	13722	11950	2809091522	2546949881	0	525466	.	.	296594	194071		1.52828	490882	.	.	279696	182189		1.5352	34584	.	.	16898	11882		1.42215	991935	.	.	592516	318205		1.86206	490213	.	.	280459
HG002	30	INDEL	HiFi	0.91754	0.926664	0.92208	pav-pgas	ALL	*	QUAL	*	0.462619	18822	7366	2809091522	2546949881	0	525466	.	.	296594	194071		1.52828	482136	.	.	276436	177131		1.56063	43330	.	.	20158	16940		1.18996	966858	.	.	581118	308042		1.88649	481468	.	.	277174
HG002	30	INDEL	HiFi	0.91754	0.926664	0.92208	pav-pgas	PASS	*	QUAL	*	0.462619	18822	7366	2809091522	2546949881	0	525466	.	.	296594	194071		1.52828	482136	.	.	276436	177131		1.56063	43330	.	.	20158	16940		1.18996	966858	.	.	581118	308042		1.88649	481468	.	.	277174
HG00733	5	INDEL	HiFi	0.198342	0.0638	0.096545	pav-pgas	ALL	*	QUAL	*	0.168814	64827	249259	3031399176	2546864659	0	524564	.	.	315538	208857		1.51078	104043	.	.	59456	44587		1.33348	420521	.	.	256082	164270		1.55891	1950879	.	.	1489468	449326		3.31489	103455	.	.	58272
HG00733	5	INDEL	HiFi	0.198342	0.0638	0.096545	pav-pgas	PASS	*	QUAL	*	0.168814	64827	249259	3031399176	2546864659	0	524564	.	.	315538	208857		1.51078	104043	.	.	59456	44587		1.33348	420521	.	.	256082	164270		1.55891	1950879	.	.	1489468	449326		3.31489	103455	.	.	58272
HG00733	8	INDEL	HiFi	0.578594	0.121289	0.200539	pav-pgas	ALL	*	QUAL	*	0.201757	71738	403040	3031399176	2546864659	0	524693	.	.	315538	208857		1.51078	303584	.	.	186474	117110		1.5923	221109	.	.	129064	91747		1.40674	3099191	.	.	2642773	392608		6.73133	300058	.	.	179379
HG00733	8	INDEL	HiFi	0.578594	0.121289	0.200539	pav-pgas	PASS	*	QUAL	*	0.201757	71738	403040	3031399176	2546864659	0	524693	.	.	315538	208857		1.51078	303584	.	.	186474	117110		1.5923	221109	.	.	129064	91747		1.40674	3099191	.	.	2642773	392608		6.73133	300058	.	.	179379
HG00733	10	INDEL	HiFi	0.576658	0.178036	0.272073	pav-pgas	ALL	*	QUAL	*	0.256618	80445	245514	3031399176	2546864659	0	524734	.	.	315538	208857		1.51078	302592	.	.	160500	142092		1.12955	222142	.	.	155038	66765		2.32214	2260811	.	.	1692791	509393		3.32315	299216	.	.	153723
HG00733	10	INDEL	HiFi	0.576658	0.178036	0.272073	pav-pgas	PASS	*	QUAL	*	0.256618	80445	245514	3031399176	2546864659	0	524734	.	.	315538	208857		1.51078	302592	.	.	160500	142092		1.12955	222142	.	.	155038	66765		2.32214	2260811	.	.	1692791	509393		3.32315	299216	.	.	153723
HG00733	12	INDEL	HiFi	0.777842	0.270483	0.401389	pav-pgas	ALL	*	QUAL	*	0.282093	34820	223499	3031399176	2546864659	0	524775	.	.	315538	208857		1.51078	408192	.	.	240763	167429		1.438	116583	.	.	74775	41428		1.80494	2071077	.	.	1592557	390325		4.08008	402165	.	.	228667
HG00733	12	INDEL	HiFi	0.777842	0.270483	0.401389	pav-pgas	PASS	*	QUAL	*	0.282093	34820	223499	3031399176	2546864659	0	524775	.	.	315538	208857		1.51078	408192	.	.	240763	167429		1.438	116583	.	.	74775	41428		1.80494	2071077	.	.	1592557	390325		4.08008	402165	.	.	228667
HG00733	15	INDEL	HiFi	0.857607	0.448095	0.588633	pav-pgas	ALL	*	QUAL	*	0.351905	18182	126238	3031399176	2546864659	0	524788	.	.	315538	208857		1.51078	450062	.	.	273894	176168		1.55473	74726	.	.	41644	32689		1.27395	1524401	.	.	1080627	348553		3.10032	442699	.	.	259150
HG00733	15	INDEL	HiFi	0.857607	0.448095	0.588633	pav-pgas	PASS	*	QUAL	*	0.351905	18182	126238	3031399176	2546864659	0	524788	.	.	315538	208857		1.51078	450062	.	.	273894	176168		1.55473	74726	.	.	41644	32689		1.27395	1524401	.	.	1080627	348553		3.10032	442699	.	.	259150
HG00733	17	INDEL	HiFi	0.871704	0.565034	0.68564	pav-pgas	ALL	*	QUAL	*	0.390116	14749	90353	3031399176	2546864659	0	524777	.	.	315538	208857		1.51078	457450	.	.	278780	178670		1.56031	67327	.	.	36758	30187		1.21768	1305369	.	.	863159	347748		2.48214	449837	.	.	263538
HG00733	17	INDEL	HiFi	0.871704	0.565034	0.68564	pav-pgas	PASS	*	QUAL	*	0.390116	14749	90353	3031399176	2546864659	0	524777	.	.	315538	208857		1.51078	457450	.	.	278780	178670		1.56031	67327	.	.	36758	30187		1.21768	1305369	.	.	863159	347748		2.48214	449837	.	.	263538
HG00733	20	INDEL	HiFi	0.878414	0.693586	0.775135	pav-pgas	ALL	*	QUAL	*	0.43055	14302	62242	3031399176	2546864659	0	524781	.	.	315538	208857		1.51078	460975	.	.	281950	179025		1.57492	63806	.	.	33588	29832		1.12591	1147671	.	.	710131	345316		2.05647	453287	.	.	266569
HG00733	20	INDEL	HiFi	0.878414	0.693586	0.775135	pav-pgas	PASS	*	QUAL	*	0.43055	14302	62242	3031399176	2546864659	0	524781	.	.	315538	208857		1.51078	460975	.	.	281950	179025		1.57492	63806	.	.	33588	29832		1.12591	1147671	.	.	710131	345316		2.05647	453287	.	.	266569
HG00733	25	INDEL	HiFi	0.878566	0.784096	0.828647	pav-pgas	ALL	*	QUAL	*	0.449649	14679	47029	3031399176	2546864659	0	524785	.	.	315538	208857		1.51078	461058	.	.	283253	177805		1.59305	63727	.	.	32285	31052		1.03971	1050287	.	.	623954	337273		1.85	453228	.	.	267589
HG00733	25	INDEL	HiFi	0.878566	0.784096	0.828647	pav-pgas	PASS	*	QUAL	*	0.449649	14679	47029	3031399176	2546864659	0	524785	.	.	315538	208857		1.51078	461058	.	.	283253	177805		1.59305	63727	.	.	32285	31052		1.03971	1050287	.	.	623954	337273		1.85	453228	.	.	267589
HG00733	30	INDEL	HiFi	0.837787	0.785263	0.810675	pav-pgas	ALL	*	QUAL	*	0.456689	26840	40657	3031399176	2546864659	0	524780	.	.	315538	208857		1.51078	439654	.	.	274724	164930		1.6657	85126	.	.	40814	43927		0.929132	1013432	.	.	617411	314043		1.96601	432373	.	.	260163
HG00733	30	INDEL	HiFi	0.837787	0.785263	0.810675	pav-pgas	PASS	*	QUAL	*	0.456689	26840	40657	3031399176	2546864659	0	524780	.	.	315538	208857		1.51078	439654	.	.	274724	164930		1.6657	85126	.	.	40814	43927		0.929132	1013432	.	.	617411	314043		1.96601	432373	.	.	260163
[truncated: 17 more columns]
