# Supplementary material for: Whole-genome long-read sequencing downsampling and its effect on variant-calling precision and recall
Source: Genome Res. 2023 Dec;33(12):2029–40. doi: 10.1101/gr.278070.123 (PMC10760522; doi:10.1101/gr.278070.123)
Supplement: Supplement 10 [file Supplemental_Table_S8.xlsx]

## Sheet: S8
S8 - SV (assembly-based)
SAMPLE	COVERAGE	SVTYPE	TECH	CALLER	RECALL	PRECISION	F1	COUNT_QUERY	COUNT_TRUTH	COUNT_SHARED	TRUTHSET
HG002	5	SV (DEL)	HiFi	PAV (PGAS)	0.253166	0.769661	0.381007	700	6900	2339	HGSVC (Freeze 4)
HG002	5	SV (INS)	HiFi	PAV (PGAS)	0.248992	0.794715	0.379182	909	10614	3519	HGSVC (Freeze 4)
HG002	5	SV (DEL)	HiFi	PAV (hifiasm)	0.513908	0.784016	0.620856	1308	4491	4748	HGSVC (Freeze 4)
HG002	5	SV (INS)	HiFi	PAV (hifiasm)	0.494516	0.78643	0.607211	1898	7144	6989	HGSVC (Freeze 4)
HG002	5	SV (DEL)	HiFi	PAV (hifiasm-trio)	0.51261	0.784236	0.619976	1303	4503	4736	HGSVC (Freeze 4)
HG002	5	SV (INS)	HiFi	PAV (hifiasm-trio)	0.489846	0.785633	0.603443	1889	7210	6923	HGSVC (Freeze 4)
HG002	5	SV (DEL)	HiFi	SVIM-asm	0.47332	0.746373	0.579282	1486	4866	4373	HGSVC (Freeze 4)
HG002	5	SV (INS)	HiFi	SVIM-asm	0.456662	0.763155	0.571403	2003	7679	6454	HGSVC (Freeze 4)
HG002	5	SV (DEL)	ONT	PAV (Flye)	0.598008	0.755091	0.667432	1792	3714	5525	HGSVC (Freeze 4)
HG002	5	SV (INS)	ONT	PAV (Flye)	0.630369	0.717773	0.671238	3503	5224	8909	HGSVC (Freeze 4)
HG002	5	SV (DEL)	UL-ONT	PAV (Flye)	0.640329	0.769711	0.699084	1770	3323	5916	HGSVC (Freeze 4)
HG002	5	SV (INS)	UL-ONT	PAV (Flye)	0.671407	0.719572	0.694656	3698	4644	9489	HGSVC (Freeze 4)
HG002	8	SV (DEL)	HiFi	PAV (PGAS)	0.631887	0.815022	0.711864	1325	3401	5838	HGSVC (Freeze 4)
HG002	8	SV (INS)	HiFi	PAV (PGAS)	0.609849	0.803412	0.693375	2109	5514	8619	HGSVC (Freeze 4)
HG002	8	SV (DEL)	HiFi	PAV (hifiasm)	0.750081	0.807692	0.777821	1650	2309	6930	HGSVC (Freeze 4)
HG002	8	SV (INS)	HiFi	PAV (hifiasm)	0.732399	0.794947	0.762392	2670	3782	10351	HGSVC (Freeze 4)
HG002	8	SV (DEL)	HiFi	PAV (hifiasm-trio)	0.765126	0.812809	0.788247	1628	2170	7069	HGSVC (Freeze 4)
HG002	8	SV (INS)	HiFi	PAV (hifiasm-trio)	0.745631	0.798333	0.771083	2662	3595	10538	HGSVC (Freeze 4)
HG002	8	SV (DEL)	HiFi	SVIM-asm	0.681892	0.758945	0.718358	2001	2939	6300	HGSVC (Freeze 4)
HG002	8	SV (INS)	HiFi	SVIM-asm	0.661501	0.770416	0.711817	2786	4784	9349	HGSVC (Freeze 4)
HG002	8	SV (DEL)	ONT	PAV (Flye)	0.76978	0.805162	0.787074	1721	2127	7112	HGSVC (Freeze 4)
HG002	8	SV (INS)	ONT	PAV (Flye)	0.781009	0.760455	0.770595	3477	3095	11038	HGSVC (Freeze 4)
HG002	8	SV (DEL)	UL-ONT	PAV (Flye)	0.767399	0.801583	0.784119	1755	2149	7090	HGSVC (Freeze 4)
HG002	8	SV (INS)	UL-ONT	PAV (Flye)	0.778462	0.747215	0.762519	3722	3131	11002	HGSVC (Freeze 4)
HG002	10	SV (DEL)	HiFi	PAV (PGAS)	0.678428	0.838416	0.749985	1208	2971	6268	HGSVC (Freeze 4)
HG002	10	SV (INS)	HiFi	PAV (PGAS)	0.693979	0.820067	0.751773	2152	4325	9808	HGSVC (Freeze 4)
HG002	10	SV (DEL)	HiFi	PAV (hifiasm)	0.663167	0.834514	0.739039	1215	3112	6127	HGSVC (Freeze 4)
HG002	10	SV (INS)	HiFi	PAV (hifiasm)	0.677846	0.826931	0.745003	2005	4553	9580	HGSVC (Freeze 4)
HG002	10	SV (DEL)	HiFi	PAV (hifiasm-trio)	0.711765	0.833038	0.767641	1318	2663	6576	HGSVC (Freeze 4)
HG002	10	SV (INS)	HiFi	PAV (hifiasm-trio)	0.722069	0.819021	0.767495	2255	3928	10205	HGSVC (Freeze 4)
HG002	10	SV (DEL)	HiFi	SVIM-asm	0.760797	0.747686	0.754185	2372	2210	7029	HGSVC (Freeze 4)
HG002	10	SV (INS)	HiFi	SVIM-asm	0.739192	0.716529	0.727684	4133	3686	10447	HGSVC (Freeze 4)
HG002	10	SV (DEL)	ONT	PAV (Flye)	0.833315	0.814192	0.823643	1757	1540	7699	HGSVC (Freeze 4)
HG002	10	SV (INS)	ONT	PAV (Flye)	0.827637	0.76421	0.79466	3609	2436	11697	HGSVC (Freeze 4)
HG002	10	SV (DEL)	UL-ONT	PAV (Flye)	0.813833	0.82139	0.817594	1635	1720	7519	HGSVC (Freeze 4)
HG002	10	SV (INS)	UL-ONT	PAV (Flye)	0.804217	0.74118	0.771413	3969	2767	11366	HGSVC (Freeze 4)
HG002	12	SV (DEL)	HiFi	PAV (PGAS)	0.874445	0.846146	0.860063	1469	1160	8079	HGSVC (Freeze 4)
HG002	12	SV (INS)	HiFi	PAV (PGAS)	0.877591	0.816578	0.845986	2786	1730	12403	HGSVC (Freeze 4)
HG002	12	SV (DEL)	HiFi	PAV (hifiasm)	0.882022	0.839843	0.860416	1554	1090	8149	HGSVC (Freeze 4)
HG002	12	SV (INS)	HiFi	PAV (hifiasm)	0.879077	0.812823	0.844653	2861	1709	12424	HGSVC (Freeze 4)
HG002	12	SV (DEL)	HiFi	PAV (hifiasm-trio)	0.885052	0.84613	0.865154	1487	1062	8177	HGSVC (Freeze 4)
HG002	12	SV (INS)	HiFi	PAV (hifiasm-trio)	0.882049	0.813177	0.846214	2864	1667	12466	HGSVC (Freeze 4)
HG002	12	SV (DEL)	HiFi	SVIM-asm	0.793809	0.784133	0.788941	2019	1905	7334	HGSVC (Freeze 4)
HG002	12	SV (INS)	HiFi	SVIM-asm	0.777188	0.775104	0.776145	3187	3149	10984	HGSVC (Freeze 4)
HG002	12	SV (DEL)	ONT	PAV (Flye)	0.854421	0.810472	0.831867	1846	1345	7894	HGSVC (Freeze 4)
HG002	12	SV (INS)	ONT	PAV (Flye)	0.851482	0.767964	0.80757	3636	2099	12034	HGSVC (Freeze 4)
HG002	12	SV (DEL)	UL-ONT	PAV (Flye)	0.856803	0.823897	0.840028	1692	1323	7916	HGSVC (Freeze 4)
HG002	12	SV (INS)	UL-ONT	PAV (Flye)	0.847662	0.755074	0.798693	3886	2153	11980	HGSVC (Freeze 4)
HG002	15	SV (DEL)	HiFi	PAV (PGAS)	0.912436	0.858365	0.884575	1391	809	8430	HGSVC (Freeze 4)
HG002	15	SV (INS)	HiFi	PAV (PGAS)	0.92047	0.823876	0.869498	2781	1124	13009	HGSVC (Freeze 4)
HG002	15	SV (DEL)	HiFi	PAV (hifiasm)	0.911029	0.853998	0.881592	1439	822	8417	HGSVC (Freeze 4)
HG002	15	SV (INS)	HiFi	PAV (hifiasm)	0.917852	0.824352	0.868593	2764	1161	12972	HGSVC (Freeze 4)
HG002	15	SV (DEL)	HiFi	PAV (hifiasm-trio)	0.922069	0.856956	0.888321	1422	720	8519	HGSVC (Freeze 4)
HG002	15	SV (INS)	HiFi	PAV (hifiasm-trio)	0.922168	0.816604	0.866182	2927	1100	13033	HGSVC (Freeze 4)
HG002	15	SV (DEL)	HiFi	SVIM-asm	0.817188	0.787607	0.802125	2036	1689	7550	HGSVC (Freeze 4)
HG002	15	SV (INS)	HiFi	SVIM-asm	0.807967	0.773855	0.790543	3337	2714	11419	HGSVC (Freeze 4)
HG002	15	SV (DEL)	ONT	PAV (Flye)	0.825089	0.82985	0.827463	1563	1616	7623	HGSVC (Freeze 4)
HG002	15	SV (INS)	ONT	PAV (Flye)	0.823887	0.784636	0.803783	3196	2489	11644	HGSVC (Freeze 4)
HG002	15	SV (DEL)	UL-ONT	PAV (Flye)	0.878558	0.835942	0.856721	1593	1122	8117	HGSVC (Freeze 4)
HG002	15	SV (INS)	UL-ONT	PAV (Flye)	0.868959	0.761471	0.811672	3847	1852	12281	HGSVC (Freeze 4)
HG002	17	SV (DEL)	HiFi	PAV (PGAS)	0.927806	0.861594	0.893475	1377	667	8572	HGSVC (Freeze 4)
HG002	17	SV (INS)	HiFi	PAV (PGAS)	0.935541	0.829798	0.879502	2712	911	13222	HGSVC (Freeze 4)
HG002	17	SV (DEL)	HiFi	PAV (hifiasm)	0.922502	0.860388	0.890363	1383	716	8523	HGSVC (Freeze 4)
HG002	17	SV (INS)	HiFi	PAV (hifiasm)	0.928678	0.824072	0.873253	2802	1008	13125	HGSVC (Freeze 4)
HG002	17	SV (DEL)	HiFi	PAV (hifiasm-trio)	0.928239	0.861736	0.893752	1376	663	8576	HGSVC (Freeze 4)
HG002	17	SV (INS)	HiFi	PAV (hifiasm-trio)	0.932003	0.821914	0.873504	2854	961	13172	HGSVC (Freeze 4)
HG002	17	SV (DEL)	HiFi	SVIM-asm	0.824007	0.796756	0.810152	1942	1626	7613	HGSVC (Freeze 4)
HG002	17	SV (INS)	HiFi	SVIM-asm	0.814689	0.782148	0.798087	3207	2619	11514	HGSVC (Freeze 4)
HG002	17	SV (DEL)	ONT	PAV (Flye)	0.892954	0.834007	0.862475	1642	989	8250	HGSVC (Freeze 4)
HG002	17	SV (INS)	ONT	PAV (Flye)	0.890115	0.787431	0.835631	3396	1553	12580	HGSVC (Freeze 4)
HG002	17	SV (DEL)	UL-ONT	PAV (Flye)	0.870549	0.827639	0.848552	1675	1196	8043	HGSVC (Freeze 4)
HG002	17	SV (INS)	UL-ONT	PAV (Flye)	0.857709	0.76311	0.807649	3763	2011	12122	HGSVC (Freeze 4)
HG002	20	SV (DEL)	HiFi	PAV (PGAS)	0.93311	0.86774	0.899239	1314	618	8621	HGSVC (Freeze 4)
HG002	20	SV (INS)	HiFi	PAV (PGAS)	0.946013	0.823682	0.880619	2862	763	13370	HGSVC (Freeze 4)
HG002	20	SV (DEL)	HiFi	PAV (hifiasm)	0.932136	0.867708	0.898769	1313	627	8612	HGSVC (Freeze 4)
HG002	20	SV (INS)	HiFi	PAV (hifiasm)	0.942758	0.825271	0.880111	2821	809	13324	HGSVC (Freeze 4)
HG002	20	SV (DEL)	HiFi	PAV (hifiasm-trio)	0.934084	0.860676	0.895879	1397	609	8630	HGSVC (Freeze 4)
HG002	20	SV (INS)	HiFi	PAV (hifiasm-trio)	0.943395	0.82125	0.878095	2902	800	13333	HGSVC (Freeze 4)
HG002	20	SV (DEL)	HiFi	SVIM-asm	0.826713	0.79604	0.811086	1957	1601	7638	HGSVC (Freeze 4)
HG002	20	SV (INS)	HiFi	SVIM-asm	0.822826	0.782729	0.802277	3228	2504	11629	HGSVC (Freeze 4)
HG002	20	SV (DEL)	ONT	PAV (Flye)	0.901721	0.836866	0.868084	1624	908	8331	HGSVC (Freeze 4)
HG002	20	SV (INS)	ONT	PAV (Flye)	0.892167	0.79252	0.839397	3301	1524	12609	HGSVC (Freeze 4)
HG002	20	SV (DEL)	UL-ONT	PAV (Flye)	0.881481	0.830681	0.855327	1660	1095	8144	HGSVC (Freeze 4)
HG002	20	SV (INS)	UL-ONT	PAV (Flye)	0.87186	0.769452	0.817461	3692	1811	12322	HGSVC (Freeze 4)
HG002	25	SV (DEL)	HiFi	PAV (PGAS)	0.932027	0.867258	0.898477	1318	628	8611	HGSVC (Freeze 4)
HG002	25	SV (INS)	HiFi	PAV (PGAS)	0.942829	0.821922	0.878234	2887	808	13325	HGSVC (Freeze 4)
HG002	25	SV (DEL)	HiFi	PAV (hifiasm)	0.919364	0.864441	0.891057	1332	745	8494	HGSVC (Freeze 4)
HG002	25	SV (INS)	HiFi	PAV (hifiasm)	0.931083	0.818651	0.871255	2915	974	13159	HGSVC (Freeze 4)
HG002	25	SV (DEL)	HiFi	PAV (hifiasm-trio)	0.93246	0.866264	0.898144	1330	624	8615	HGSVC (Freeze 4)
HG002	25	SV (INS)	HiFi	PAV (hifiasm-trio)	0.942192	0.818489	0.875995	2953	817	13316	HGSVC (Freeze 4)
HG002	25	SV (DEL)	HiFi	SVIM-asm	0.8318	0.801272	0.816251	1906	1554	7685	HGSVC (Freeze 4)
HG002	25	SV (INS)	HiFi	SVIM-asm	0.828487	0.781121	0.804107	3281	2424	11709	HGSVC (Freeze 4)
HG002	25	SV (DEL)	ONT	PAV (Flye)	0.898257	0.84015	0.868232	1579	940	8299	HGSVC (Freeze 4)
HG002	25	SV (INS)	ONT	PAV (Flye)	0.890894	0.794836	0.840128	3250	1542	12591	HGSVC (Freeze 4)
HG002	25	SV (DEL)	UL-ONT	PAV (Flye)	0.884078	0.836714	0.859744	1594	1071	8168	HGSVC (Freeze 4)
HG002	25	SV (INS)	UL-ONT	PAV (Flye)	0.877096	0.779525	0.825437	3506	1737	12396	HGSVC (Freeze 4)
HG002	30	SV (DEL)	HiFi	PAV (PGAS)	0.921637	0.866843	0.8934	1308	724	8515	HGSVC (Freeze 4)
HG002	30	SV (INS)	HiFi	PAV (PGAS)	0.93731	0.821468	0.875574	2879	886	13247	HGSVC (Freeze 4)
HG002	30	SV (DEL)	HiFi	PAV (hifiasm)	0.902262	0.868967	0.885302	1257	903	8336	HGSVC (Freeze 4)
HG002	30	SV (INS)	HiFi	PAV (hifiasm)	0.919833	0.822733	0.868578	2801	1133	13000	HGSVC (Freeze 4)
HG002	30	SV (DEL)	HiFi	PAV (hifiasm-trio)	0.927157	0.86938	0.897339	1287	673	8566	HGSVC (Freeze 4)
HG002	30	SV (INS)	HiFi	PAV (hifiasm-trio)	0.940352	0.822503	0.877488	2868	843	13290	HGSVC (Freeze 4)
HG002	30	SV (DEL)	HiFi	SVIM-asm	0.833099	0.800603	0.816528	1917	1542	7697	HGSVC (Freeze 4)
HG002	30	SV (INS)	HiFi	SVIM-asm	0.83068	0.779186	0.80411	3327	2393	11740	HGSVC (Freeze 4)
HG002	30	SV (DEL)	ONT	PAV (Flye)	0.908323	0.83644	0.870901	1641	847	8392	HGSVC (Freeze 4)
HG002	30	SV (INS)	ONT	PAV (Flye)	0.899667	0.799183	0.846453	3195	1418	12715	HGSVC (Freeze 4)
HG002	30	SV (DEL)	UL-ONT	PAV (Flye)	0.890248	0.839371	0.864061	1574	1014	8225	HGSVC (Freeze 4)
HG002	30	SV (INS)	UL-ONT	PAV (Flye)	0.884526	0.780483	0.829254	3516	1632	12501	HGSVC (Freeze 4)
HG00733	5	SV (DEL)	HiFi	PAV (PGAS)	0.286773	0.775552	0.418718	773	6643	2671	HGSVC (Freeze 4)
HG00733	5	SV (INS)	HiFi	PAV (PGAS)	0.288252	0.80599	0.424637	1004	10299	4171	HGSVC (Freeze 4)
HG00733	5	SV (DEL)	HiFi	PAV (hifiasm)	0.500859	0.77984	0.609963	1317	4649	4665	HGSVC (Freeze 4)
HG00733	5	SV (INS)	HiFi	PAV (hifiasm)	0.494264	0.795374	0.609667	1840	7318	7152	HGSVC (Freeze 4)
HG00733	5	SV (DEL)	HiFi	PAV (hifiasm-trio)	0.498175	0.782198	0.608684	1292	4674	4640	HGSVC (Freeze 4)
HG00733	5	SV (INS)	HiFi	PAV (hifiasm-trio)	0.489634	0.791886	0.605116	1862	7385	7085	HGSVC (Freeze 4)
HG00733	5	SV (DEL)	HiFi	SVIM-asm	0.460275	0.720141	0.561603	1666	5027	4287	HGSVC (Freeze 4)
HG00733	5	SV (INS)	HiFi	SVIM-asm	0.455563	0.765888	0.571305	2015	7878	6592	HGSVC (Freeze 4)
HG00733	5	SV (DEL)	ONT	PAV (Flye)	0.603393	0.742012	0.665561	1954	3694	5620	HGSVC (Freeze 4)
HG00733	5	SV (INS)	ONT	PAV (Flye)	0.636628	0.72564	0.678226	3483	5258	9212	HGSVC (Freeze 4)
HG00733	5	SV (DEL)	UL-ONT	PAV (Flye)	0.625295	0.793136	0.699286	1519	3490	5824	HGSVC (Freeze 4)
HG00733	5	SV (INS)	UL-ONT	PAV (Flye)	0.670422	0.735928	0.701649	3481	4769	9701	HGSVC (Freeze 4)
HG00733	8	SV (DEL)	HiFi	PAV (PGAS)	0.711295	0.815686	0.759922	1497	2689	6625	HGSVC (Freeze 4)
HG00733	8	SV (INS)	HiFi	PAV (PGAS)	0.71009	0.816318	0.759508	2312	4195	10275	HGSVC (Freeze 4)
HG00733	8	SV (DEL)	HiFi	PAV (hifiasm)	0.752523	0.819766	0.784707	1541	2305	7009	HGSVC (Freeze 4)
HG00733	8	SV (INS)	HiFi	PAV (hifiasm)	0.745612	0.808771	0.775908	2551	3681	10789	HGSVC (Freeze 4)
HG00733	8	SV (DEL)	HiFi	PAV (hifiasm-trio)	0.764119	0.816357	0.789374	1601	2197	7117	HGSVC (Freeze 4)
HG00733	8	SV (INS)	HiFi	PAV (hifiasm-trio)	0.757429	0.807188	0.781517	2618	3510	10960	HGSVC (Freeze 4)
HG00733	8	SV (DEL)	HiFi	SVIM-asm	0.684239	0.752509	0.716752	2096	2941	6373	HGSVC (Freeze 4)
HG00733	8	SV (INS)	HiFi	SVIM-asm	0.67443	0.770853	0.719425	2901	4711	9759	HGSVC (Freeze 4)
HG00733	8	SV (DEL)	ONT	PAV (Flye)	0.731909	0.800023	0.764452	1704	2497	6817	HGSVC (Freeze 4)
HG00733	8	SV (INS)	ONT	PAV (Flye)	0.745473	0.760076	0.752704	3405	3683	10787	HGSVC (Freeze 4)
HG00733	8	SV (DEL)	UL-ONT	PAV (Flye)	0.755529	0.82837	0.790275	1458	2277	7037	HGSVC (Freeze 4)
HG00733	8	SV (INS)	UL-ONT	PAV (Flye)	0.774292	0.7614	0.767792	3511	3266	11204	HGSVC (Freeze 4)
HG00733	10	SV (DEL)	HiFi	PAV (PGAS)	0.756818	0.836875	0.794836	1374	2265	7049	HGSVC (Freeze 4)
HG00733	10	SV (INS)	HiFi	PAV (PGAS)	0.763511	0.824785	0.792966	2347	3422	11048	HGSVC (Freeze 4)
HG00733	10	SV (DEL)	HiFi	PAV (hifiasm)	0.823814	0.830861	0.827322	1562	1641	7673	HGSVC (Freeze 4)
HG00733	10	SV (INS)	HiFi	PAV (hifiasm)	0.824948	0.814201	0.819539	2724	2533	11937	HGSVC (Freeze 4)
HG00733	10	SV (DEL)	HiFi	PAV (hifiasm-trio)	0.847971	0.833826	0.840839	1574	1416	7898	HGSVC (Freeze 4)
HG00733	10	SV (INS)	HiFi	PAV (hifiasm-trio)	0.84188	0.81089	0.826094	2841	2288	12182	HGSVC (Freeze 4)
HG00733	10	SV (DEL)	HiFi	SVIM-asm	0.760361	0.761915	0.761137	2213	2232	7082	HGSVC (Freeze 4)
HG00733	10	SV (INS)	HiFi	SVIM-asm	0.745128	0.762679	0.753802	3355	3688	10782	HGSVC (Freeze 4)
HG00733	10	SV (DEL)	ONT	PAV (Flye)	0.795899	0.8139	0.804799	1695	1901	7413	HGSVC (Freeze 4)
HG00733	10	SV (INS)	ONT	PAV (Flye)	0.785211	0.762448	0.773662	3540	3108	11362	HGSVC (Freeze 4)
HG00733	10	SV (DEL)	UL-ONT	PAV (Flye)	0.806957	0.842695	0.824439	1403	1798	7516	HGSVC (Freeze 4)
HG00733	10	SV (INS)	UL-ONT	PAV (Flye)	0.808017	0.7718	0.789493	3457	2778	11692	HGSVC (Freeze 4)
HG00733	12	SV (DEL)	HiFi	PAV (PGAS)	0.863002	0.845216	0.854016	1472	1276	8038	HGSVC (Freeze 4)
HG00733	12	SV (INS)	HiFi	PAV (PGAS)	0.870974	0.820081	0.844762	2765	1867	12603	HGSVC (Freeze 4)
HG00733	12	SV (DEL)	HiFi	PAV (hifiasm)	0.861499	0.843655	0.852483	1487	1290	8024	HGSVC (Freeze 4)
HG00733	12	SV (INS)	HiFi	PAV (hifiasm)	0.867657	0.818982	0.842617	2775	1915	12555	HGSVC (Freeze 4)
HG00733	12	SV (DEL)	HiFi	PAV (hifiasm-trio)	0.88673	0.845343	0.865542	1511	1055	8259	HGSVC (Freeze 4)
HG00733	12	SV (INS)	HiFi	PAV (hifiasm-trio)	0.889979	0.821039	0.85412	2807	1592	12878	HGSVC (Freeze 4)
HG00733	12	SV (DEL)	HiFi	SVIM-asm	0.794181	0.779452	0.786748	2093	1917	7397	HGSVC (Freeze 4)
HG00733	12	SV (INS)	HiFi	SVIM-asm	0.783414	0.765739	0.774476	3468	3134	11336	HGSVC (Freeze 4)
HG00733	12	SV (DEL)	ONT	PAV (Flye)	0.827357	0.820311	0.823819	1688	1608	7706	HGSVC (Freeze 4)
HG00733	12	SV (INS)	ONT	PAV (Flye)	0.822875	0.763465	0.792057	3689	2563	11907	HGSVC (Freeze 4)
HG00733	12	SV (DEL)	UL-ONT	PAV (Flye)	0.841636	0.839204	0.840418	1502	1475	7839	HGSVC (Freeze 4)
HG00733	12	SV (INS)	UL-ONT	PAV (Flye)	0.824672	0.772713	0.797847	3510	2537	11933	HGSVC (Freeze 4)
HG00733	15	SV (DEL)	HiFi	PAV (PGAS)	0.917866	0.86058	0.8883	1385	765	8549	HGSVC (Freeze 4)
HG00733	15	SV (INS)	HiFi	PAV (PGAS)	0.922668	0.822967	0.86997	2872	1119	13351	HGSVC (Freeze 4)
HG00733	15	SV (DEL)	HiFi	PAV (hifiasm)	0.912497	0.860484	0.885728	1378	815	8499	HGSVC (Freeze 4)
HG00733	15	SV (INS)	HiFi	PAV (hifiasm)	0.912992	0.820916	0.864509	2882	1259	13211	HGSVC (Freeze 4)
HG00733	15	SV (DEL)	HiFi	PAV (hifiasm-trio)	0.919583	0.863756	0.890796	1351	749	8565	HGSVC (Freeze 4)
HG00733	15	SV (INS)	HiFi	PAV (hifiasm-trio)	0.920802	0.824556	0.870025	2835	1146	13324	HGSVC (Freeze 4)
HG00733	15	SV (DEL)	HiFi	SVIM-asm	0.812755	0.78887	0.800635	2026	1744	7570	HGSVC (Freeze 4)
HG00733	15	SV (INS)	HiFi	SVIM-asm	0.805183	0.777978	0.791347	3325	2819	11651	HGSVC (Freeze 4)
HG00733	15	SV (DEL)	ONT	PAV (Flye)	0.864827	0.832042	0.848118	1626	1259	8055	HGSVC (Freeze 4)
HG00733	15	SV (INS)	ONT	PAV (Flye)	0.846994	0.77496	0.809378	3559	2214	12256	HGSVC (Freeze 4)
HG00733	15	SV (DEL)	UL-ONT	PAV (Flye)	0.875242	0.851651	0.863285	1420	1162	8152	HGSVC (Freeze 4)
HG00733	15	SV (INS)	UL-ONT	PAV (Flye)	0.868072	0.778446	0.820819	3575	1909	12561	HGSVC (Freeze 4)
HG00733	17	SV (DEL)	HiFi	PAV (PGAS)	0.925703	0.866184	0.894955	1332	692	8622	HGSVC (Freeze 4)
HG00733	17	SV (INS)	HiFi	PAV (PGAS)	0.931306	0.831134	0.878373	2738	994	13476	HGSVC (Freeze 4)
HG00733	17	SV (DEL)	HiFi	PAV (hifiasm)	0.927528	0.863468	0.894353	1366	675	8639	HGSVC (Freeze 4)
HG00733	17	SV (INS)	HiFi	PAV (hifiasm)	0.928265	0.826534	0.874451	2819	1038	13432	HGSVC (Freeze 4)
HG00733	17	SV (DEL)	HiFi	PAV (hifiasm-trio)	0.917651	0.862985	0.889479	1357	767	8547	HGSVC (Freeze 4)
HG00733	17	SV (INS)	HiFi	PAV (hifiasm-trio)	0.924188	0.822751	0.870525	2881	1097	13373	HGSVC (Freeze 4)
HG00733	17	SV (DEL)	HiFi	SVIM-asm	0.817801	0.791048	0.804202	2012	1697	7617	HGSVC (Freeze 4)
HG00733	17	SV (INS)	HiFi	SVIM-asm	0.8085	0.784641	0.796392	3211	2771	11699	HGSVC (Freeze 4)
HG00733	17	SV (DEL)	ONT	PAV (Flye)	0.88265	0.83116	0.856131	1670	1093	8221	HGSVC (Freeze 4)
HG00733	17	SV (INS)	ONT	PAV (Flye)	0.86123	0.774326	0.815469	3632	2008	12462	HGSVC (Freeze 4)
HG00733	17	SV (DEL)	UL-ONT	PAV (Flye)	0.873631	0.849995	0.861651	1436	1177	8137	HGSVC (Freeze 4)
HG00733	17	SV (INS)	UL-ONT	PAV (Flye)	0.861645	0.78184	0.819805	3479	2002	12468	HGSVC (Freeze 4)
HG00733	20	SV (DEL)	HiFi	PAV (PGAS)	0.927314	0.871632	0.898611	1272	677	8637	HGSVC (Freeze 4)
HG00733	20	SV (INS)	HiFi	PAV (PGAS)	0.935107	0.828243	0.878437	2806	939	13531	HGSVC (Freeze 4)
HG00733	20	SV (DEL)	HiFi	PAV (hifiasm)	0.930857	0.871883	0.900405	1274	644	8670	HGSVC (Freeze 4)
HG00733	20	SV (INS)	HiFi	PAV (hifiasm)	0.937042	0.833118	0.88203	2716	911	13559	HGSVC (Freeze 4)
HG00733	20	SV (DEL)	HiFi	PAV (hifiasm-trio)	0.931823	0.871298	0.900545	1282	635	8679	HGSVC (Freeze 4)
HG00733	20	SV (INS)	HiFi	PAV (hifiasm-trio)	0.938079	0.828997	0.880171	2800	896	13574	HGSVC (Freeze 4)
HG00733	20	SV (DEL)	HiFi	SVIM-asm	0.820915	0.795381	0.807946	1967	1668	7646	HGSVC (Freeze 4)
HG00733	20	SV (INS)	HiFi	SVIM-asm	0.813614	0.786229	0.799688	3201	2697	11773	HGSVC (Freeze 4)
HG00733	20	SV (DEL)	ONT	PAV (Flye)	0.884904	0.834548	0.858989	1634	1072	8242	HGSVC (Freeze 4)
HG00733	20	SV (INS)	ONT	PAV (Flye)	0.865515	0.781236	0.821219	3507	1946	12524	HGSVC (Freeze 4)
HG00733	20	SV (DEL)	UL-ONT	PAV (Flye)	0.896607	0.841495	0.868178	1573	963	8351	HGSVC (Freeze 4)
HG00733	20	SV (INS)	UL-ONT	PAV (Flye)	0.881272	0.787939	0.831996	3432	1718	12752	HGSVC (Freeze 4)
HG00733	25	SV (DEL)	HiFi	PAV (PGAS)	0.921516	0.86662	0.893225	1321	731	8583	HGSVC (Freeze 4)
HG00733	25	SV (INS)	HiFi	PAV (PGAS)	0.929993	0.829246	0.876735	2771	1013	13457	HGSVC (Freeze 4)
HG00733	25	SV (DEL)	HiFi	PAV (hifiasm)	0.930749	0.874332	0.901659	1246	645	8669	HGSVC (Freeze 4)
HG00733	25	SV (INS)	HiFi	PAV (hifiasm)	0.94105	0.832437	0.883418	2741	853	13617	HGSVC (Freeze 4)
HG00733	25	SV (DEL)	HiFi	PAV (hifiasm-trio)	0.920657	0.86853	0.893834	1298	739	8575	HGSVC (Freeze 4)
HG00733	25	SV (INS)	HiFi	PAV (hifiasm-trio)	0.933932	0.831836	0.879932	2732	956	13514	HGSVC (Freeze 4)
HG00733	25	SV (DEL)	HiFi	SVIM-asm	0.823706	0.792808	0.807962	2005	1642	7672	HGSVC (Freeze 4)
HG00733	25	SV (INS)	HiFi	SVIM-asm	0.818037	0.782767	0.800014	3285	2633	11837	HGSVC (Freeze 4)
HG00733	25	SV (DEL)	ONT	PAV (Flye)	0.900365	0.839271	0.868745	1606	928	8386	HGSVC (Freeze 4)
HG00733	25	SV (INS)	ONT	PAV (Flye)	0.883898	0.79058	0.834638	3388	1680	12790	HGSVC (Freeze 4)
HG00733	25	SV (DEL)	UL-ONT	PAV (Flye)	0.910243	0.852232	0.880282	1470	836	8478	HGSVC (Freeze 4)
HG00733	25	SV (INS)	UL-ONT	PAV (Flye)	0.895232	0.790119	0.839397	3441	1516	12954	HGSVC (Freeze 4)
HG00733	30	SV (DEL)	HiFi	PAV (PGAS)	0.907773	0.872459	0.889766	1236	859	8455	HGSVC (Freeze 4)
HG00733	30	SV (INS)	HiFi	PAV (PGAS)	0.919903	0.832458	0.873999	2679	1159	13311	HGSVC (Freeze 4)
HG00733	30	SV (DEL)	HiFi	PAV (hifiasm)	0.894567	0.873284	0.883797	1209	982	8332	HGSVC (Freeze 4)
HG00733	30	SV (INS)	HiFi	PAV (hifiasm)	0.899793	0.827876	0.862337	2707	1450	13020	HGSVC (Freeze 4)
HG00733	30	SV (DEL)	HiFi	PAV (hifiasm-trio)	0.912283	0.874987	0.893246	1214	817	8497	HGSVC (Freeze 4)
HG00733	30	SV (INS)	HiFi	PAV (hifiasm-trio)	0.928265	0.83413	0.878684	2671	1038	13432	HGSVC (Freeze 4)
HG00733	30	SV (DEL)	HiFi	SVIM-asm	0.821988	0.792793	0.807127	2001	1658	7656	HGSVC (Freeze 4)
HG00733	30	SV (INS)	HiFi	SVIM-asm	0.818798	0.78672	0.802438	3212	2622	11848	HGSVC (Freeze 4)
HG00733	30	SV (DEL)	ONT	PAV (Flye)	0.873524	0.840235	0.856556	1547	1178	8136	HGSVC (Freeze 4)
HG00733	30	SV (INS)	ONT	PAV (Flye)	0.866621	0.791367	0.827286	3306	1930	12540	HGSVC (Freeze 4)
HG00733	30	SV (DEL)	UL-ONT	PAV (Flye)	0.890917	0.854935	0.872555	1408	1016	8298	HGSVC (Freeze 4)
HG00733	30	SV (INS)	UL-ONT	PAV (Flye)	0.876987	0.799572	0.836492	3181	1780	12690	HGSVC (Freeze 4)
