# Supplementary material for: Whole-genome long-read sequencing downsampling and its effect on variant-calling precision and recall
Source: Genome Res. 2023 Dec;33(12):2029–40. doi: 10.1101/gr.278070.123 (PMC10760522; doi:10.1101/gr.278070.123)
Supplement: Supplement 11 [file Supplemental_Table_S9.xlsx]

## Sheet: S9
S9 - Clinical Recall (read-based)
SVTYPE	SAMPLE	CALLER	COVERAGE	RECALL
SV (DEL)	HG002	cutesv	5	0.757895
SV (DEL)	HG002	cutesv	8	0.810526
SV (DEL)	HG002	cutesv	10	0.863158
SV (DEL)	HG002	cutesv	12	0.831579
SV (DEL)	HG002	cutesv	15	0.926316
SV (DEL)	HG002	cutesv	17	0.926316
SV (DEL)	HG002	cutesv	20	0.936842
SV (DEL)	HG002	cutesv	25	0.957895
SV (DEL)	HG002	cutesv	30	0.947368
SV (DEL)	HG002	delly	5	0.621053
SV (DEL)	HG002	delly	8	0.778947
SV (DEL)	HG002	delly	10	0.873684
SV (DEL)	HG002	delly	12	0.873684
SV (DEL)	HG002	delly	15	0.915789
SV (DEL)	HG002	delly	17	0.926316
SV (DEL)	HG002	delly	20	0.936842
SV (DEL)	HG002	delly	25	0.936842
SV (DEL)	HG002	delly	30	0.936842
SV (DEL)	HG002	pbsv	5	0.547368
SV (DEL)	HG002	pbsv	8	0.757895
SV (DEL)	HG002	pbsv	10	0.821053
SV (DEL)	HG002	pbsv	12	0.915789
SV (DEL)	HG002	pbsv	15	0.978947
SV (DEL)	HG002	pbsv	17	0.957895
SV (DEL)	HG002	pbsv	20	0.968421
SV (DEL)	HG002	pbsv	25	0.978947
SV (DEL)	HG002	pbsv	30	0.978947
SV (DEL)	HG002	sniffles	5	0.747368
SV (DEL)	HG002	sniffles	8	0.873684
SV (DEL)	HG002	sniffles	10	0.915789
SV (DEL)	HG002	sniffles	12	0.926316
SV (DEL)	HG002	sniffles	15	0.957895
SV (DEL)	HG002	sniffles	17	0.936842
SV (DEL)	HG002	sniffles	20	0.957895
SV (DEL)	HG002	sniffles	25	0.968421
SV (DEL)	HG002	sniffles	30	0.947368
SV (DEL)	HG002	svim	5	0.589474
SV (DEL)	HG002	svim	8	0.8
SV (DEL)	HG002	svim	10	0.915789
SV (DEL)	HG002	svim	12	0.852632
SV (DEL)	HG002	svim	15	0.936842
SV (DEL)	HG002	svim	17	0.947368
SV (DEL)	HG002	svim	20	0.968421
SV (DEL)	HG002	svim	25	0.957895
SV (DEL)	HG002	svim	30	0.957895
SV (INS)	HG002	cutesv	5	0.661157
SV (INS)	HG002	cutesv	8	0.702479
SV (INS)	HG002	cutesv	10	0.752066
SV (INS)	HG002	cutesv	12	0.785124
SV (INS)	HG002	cutesv	15	0.818182
SV (INS)	HG002	cutesv	17	0.842975
SV (INS)	HG002	cutesv	20	0.867769
SV (INS)	HG002	cutesv	25	0.859504
SV (INS)	HG002	cutesv	30	0.884298
SV (INS)	HG002	delly	5	0.454545
SV (INS)	HG002	delly	8	0.702479
SV (INS)	HG002	delly	10	0.752066
SV (INS)	HG002	delly	12	0.809917
SV (INS)	HG002	delly	15	0.842975
SV (INS)	HG002	delly	17	0.859504
SV (INS)	HG002	delly	20	0.867769
SV (INS)	HG002	delly	25	0.859504
SV (INS)	HG002	delly	30	0.867769
SV (INS)	HG002	pbsv	5	0.46281
SV (INS)	HG002	pbsv	8	0.603306
SV (INS)	HG002	pbsv	10	0.694215
SV (INS)	HG002	pbsv	12	0.760331
SV (INS)	HG002	pbsv	15	0.826446
SV (INS)	HG002	pbsv	17	0.834711
SV (INS)	HG002	pbsv	20	0.859504
SV (INS)	HG002	pbsv	25	0.859504
SV (INS)	HG002	pbsv	30	0.876033
SV (INS)	HG002	sniffles	5	0.661157
SV (INS)	HG002	sniffles	8	0.826446
SV (INS)	HG002	sniffles	10	0.809917
SV (INS)	HG002	sniffles	12	0.85124
SV (INS)	HG002	sniffles	15	0.859504
SV (INS)	HG002	sniffles	17	0.892562
SV (INS)	HG002	sniffles	20	0.884298
SV (INS)	HG002	sniffles	25	0.892562
SV (INS)	HG002	sniffles	30	0.909091
SV (INS)	HG002	svim	5	0.429752
SV (INS)	HG002	svim	8	0.719008
SV (INS)	HG002	svim	10	0.801653
SV (INS)	HG002	svim	12	0.818182
SV (INS)	HG002	svim	15	0.834711
SV (INS)	HG002	svim	17	0.876033
SV (INS)	HG002	svim	20	0.909091
SV (INS)	HG002	svim	25	0.92562
SV (INS)	HG002	svim	30	0.92562
