# Supplementary material for: Whole-genome long-read sequencing downsampling and its effect on variant-calling precision and recall
Source: Genome Res. 2023 Dec;33(12):2029–40. doi: 10.1101/gr.278070.123 (PMC10760522; doi:10.1101/gr.278070.123)
Supplement: Supplement 12 [file Supplemental_Table_S10_.xlsx]

## Sheet: S10 
S10 - Clinical Recall (assembly-based)
SVTYPE	SAMPLE	CALLER	COVERAGE	RECALL
SV (DEL)	HG002	PAV (Flye [ONT])	5	0.589474
SV (DEL)	HG002	PAV (Flye [ONT])	8	0.726316
SV (DEL)	HG002	PAV (Flye [ONT])	10	0.684211
SV (DEL)	HG002	PAV (Flye [ONT])	12	0.747368
SV (DEL)	HG002	PAV (Flye [ONT])	15	0.631579
SV (DEL)	HG002	PAV (Flye [ONT])	17	0.684211
SV (DEL)	HG002	PAV (Flye [ONT])	20	0.663158
SV (DEL)	HG002	PAV (Flye [ONT])	25	0.663158
SV (DEL)	HG002	PAV (Flye [ONT])	30	0.768421
SV (DEL)	HG002	PAV (Flye [UL-ONT])	5	0.673684
SV (DEL)	HG002	PAV (Flye [UL-ONT])	8	0.642105
SV (DEL)	HG002	PAV (Flye [UL-ONT])	10	0.747368
SV (DEL)	HG002	PAV (Flye [UL-ONT])	12	0.589474
SV (DEL)	HG002	PAV (Flye [UL-ONT])	15	0.621053
SV (DEL)	HG002	PAV (Flye [UL-ONT])	17	0.610526
SV (DEL)	HG002	PAV (Flye [UL-ONT])	20	0.684211
SV (DEL)	HG002	PAV (Flye [UL-ONT])	25	0.663158
SV (DEL)	HG002	PAV (Flye [UL-ONT])	30	0.578947
SV (DEL)	HG002	PAV (hifiasm)	5	0.536842
SV (DEL)	HG002	PAV (hifiasm)	8	0.789474
SV (DEL)	HG002	PAV (hifiasm)	10	0.757895
SV (DEL)	HG002	PAV (hifiasm)	12	0.915789
SV (DEL)	HG002	PAV (hifiasm)	15	0.968421
SV (DEL)	HG002	PAV (hifiasm)	17	0.968421
SV (DEL)	HG002	PAV (hifiasm)	20	0.978947
SV (DEL)	HG002	PAV (hifiasm)	25	0.978947
SV (DEL)	HG002	PAV (hifiasm)	30	0.957895
SV (DEL)	HG002	PAV (hifiasm-trio)	5	0.547368
SV (DEL)	HG002	PAV (hifiasm-trio)	8	0.778947
SV (DEL)	HG002	PAV (hifiasm-trio)	10	0.8
SV (DEL)	HG002	PAV (hifiasm-trio)	12	0.894737
SV (DEL)	HG002	PAV (hifiasm-trio)	15	0.978947
SV (DEL)	HG002	PAV (hifiasm-trio)	17	0.968421
SV (DEL)	HG002	PAV (hifiasm-trio)	20	0.978947
SV (DEL)	HG002	PAV (hifiasm-trio)	25	0.989474
SV (DEL)	HG002	PAV (hifiasm-trio)	30	0.989474
SV (DEL)	HG002	PAV (PGAS)	5	0.2
SV (DEL)	HG002	PAV (PGAS)	8	0.610526
SV (DEL)	HG002	PAV (PGAS)	10	0.736842
SV (DEL)	HG002	PAV (PGAS)	12	0.905263
SV (DEL)	HG002	PAV (PGAS)	15	0.968421
SV (DEL)	HG002	PAV (PGAS)	17	0.989474
SV (DEL)	HG002	PAV (PGAS)	20	0.978947
SV (DEL)	HG002	PAV (PGAS)	25	0.978947
SV (DEL)	HG002	PAV (PGAS)	30	0.978947
SV (DEL)	HG002	svimASM (hifiasm-trio)	5	0.557895
SV (DEL)	HG002	svimASM (hifiasm-trio)	8	0.768421
SV (DEL)	HG002	svimASM (hifiasm-trio)	10	0.863158
SV (DEL)	HG002	svimASM (hifiasm-trio)	12	0.884211
SV (DEL)	HG002	svimASM (hifiasm-trio)	15	0.936842
SV (DEL)	HG002	svimASM (hifiasm-trio)	17	0.926316
SV (DEL)	HG002	svimASM (hifiasm-trio)	20	0.936842
SV (DEL)	HG002	svimASM (hifiasm-trio)	25	0.957895
SV (DEL)	HG002	svimASM (hifiasm-trio)	30	0.947368
SV (INS)	HG002	PAV (Flye [ONT])	5	0.595041
SV (INS)	HG002	PAV (Flye [ONT])	8	0.652893
SV (INS)	HG002	PAV (Flye [ONT])	10	0.68595
SV (INS)	HG002	PAV (Flye [ONT])	12	0.644628
SV (INS)	HG002	PAV (Flye [ONT])	15	0.669421
SV (INS)	HG002	PAV (Flye [ONT])	17	0.68595
SV (INS)	HG002	PAV (Flye [ONT])	20	0.652893
SV (INS)	HG002	PAV (Flye [ONT])	25	0.652893
SV (INS)	HG002	PAV (Flye [ONT])	30	0.644628
SV (INS)	HG002	PAV (Flye [UL-ONT])	5	0.545455
SV (INS)	HG002	PAV (Flye [UL-ONT])	8	0.727273
SV (INS)	HG002	PAV (Flye [UL-ONT])	10	0.644628
SV (INS)	HG002	PAV (Flye [UL-ONT])	12	0.669421
SV (INS)	HG002	PAV (Flye [UL-ONT])	15	0.710744
SV (INS)	HG002	PAV (Flye [UL-ONT])	17	0.636364
SV (INS)	HG002	PAV (Flye [UL-ONT])	20	0.669421
SV (INS)	HG002	PAV (Flye [UL-ONT])	25	0.669421
SV (INS)	HG002	PAV (Flye [UL-ONT])	30	0.661157
SV (INS)	HG002	PAV (hifiasm)	5	0.46281
SV (INS)	HG002	PAV (hifiasm)	8	0.661157
SV (INS)	HG002	PAV (hifiasm)	10	0.669421
SV (INS)	HG002	PAV (hifiasm)	12	0.834711
SV (INS)	HG002	PAV (hifiasm)	15	0.867769
SV (INS)	HG002	PAV (hifiasm)	17	0.900826
SV (INS)	HG002	PAV (hifiasm)	20	0.909091
SV (INS)	HG002	PAV (hifiasm)	25	0.942149
SV (INS)	HG002	PAV (hifiasm)	30	0.909091
SV (INS)	HG002	PAV (hifiasm-trio)	5	0.429752
SV (INS)	HG002	PAV (hifiasm-trio)	8	0.694215
SV (INS)	HG002	PAV (hifiasm-trio)	10	0.694215
SV (INS)	HG002	PAV (hifiasm-trio)	12	0.85124
SV (INS)	HG002	PAV (hifiasm-trio)	15	0.876033
SV (INS)	HG002	PAV (hifiasm-trio)	17	0.92562
SV (INS)	HG002	PAV (hifiasm-trio)	20	0.909091
SV (INS)	HG002	PAV (hifiasm-trio)	25	0.933884
SV (INS)	HG002	PAV (hifiasm-trio)	30	0.933884
SV (INS)	HG002	PAV (PGAS)	5	0.140496
SV (INS)	HG002	PAV (PGAS)	8	0.53719
SV (INS)	HG002	PAV (PGAS)	10	0.644628
SV (INS)	HG002	PAV (PGAS)	12	0.818182
SV (INS)	HG002	PAV (PGAS)	15	0.892562
SV (INS)	HG002	PAV (PGAS)	17	0.92562
SV (INS)	HG002	PAV (PGAS)	20	0.917355
SV (INS)	HG002	PAV (PGAS)	25	0.942149
SV (INS)	HG002	PAV (PGAS)	30	0.92562
SV (INS)	HG002	svimASM (hifiasm-trio)	5	0.471074
SV (INS)	HG002	svimASM (hifiasm-trio)	8	0.644628
SV (INS)	HG002	svimASM (hifiasm-trio)	10	0.760331
SV (INS)	HG002	svimASM (hifiasm-trio)	12	0.85124
SV (INS)	HG002	svimASM (hifiasm-trio)	15	0.85124
SV (INS)	HG002	svimASM (hifiasm-trio)	17	0.909091
SV (INS)	HG002	svimASM (hifiasm-trio)	20	0.909091
SV (INS)	HG002	svimASM (hifiasm-trio)	25	0.900826
SV (INS)	HG002	svimASM (hifiasm-trio)	30	0.909091
