# Supplementary material for: Whole-genome long-read sequencing downsampling and its effect on variant-calling precision and recall
Source: Genome Res. 2023 Dec;33(12):2029–40. doi: 10.1101/gr.278070.123 (PMC10760522; doi:10.1101/gr.278070.123)
Supplement: Supplement 13 [file Supplemental_Table_S11.xlsx]

## Sheet: S11
S11 - Proportion of Variant Calls in Tandem Repeats Finder (TRF)
SVTYPE	Proportion in TRF
SNV	0.075458
Indel (DEL)	0.282616
Indel (INS)	0.219211
SV (DEL)	0.599048
SV (INS)	0.541038
