# Supplementary material for: Whole-genome long-read sequencing downsampling and its effect on variant-calling precision and recall
Source: Genome Res. 2023 Dec;33(12):2029–40. doi: 10.1101/gr.278070.123 (PMC10760522; doi:10.1101/gr.278070.123)
Supplement: Supplement 14 [file Supplemental_Table_S12.xlsx]

## Sheet: S12
S12 - SV calls above 50 kbp (read-based)
SAMPLE	COVERAGE	SVTYPE	SV_MAX	LARGE_SV	LARGE_SV_TRUTH	TRUTHSET	CALLER	TECH	MERGE	FILTER	LARGE_RECALL
HG00733	5	SV (DEL)	100115	32	63	HGSVC (Freeze 4)	cutesv	HiFi	szro-50-200	all	0.507937
HG00733	5	SV (DEL)	100115	32	62	HGSVC (Freeze 4)	cutesv	HiFi	szro-50-200	notr	0.516129
HG00733	5	SV (INS)	12657	3	40	HGSVC (Freeze 4)	cutesv	HiFi	szro-50-200	all	0.075
HG00733	5	SV (INS)	12657	2	36	HGSVC (Freeze 4)	cutesv	HiFi	szro-50-200	notr	0.0555556
HG00733	5	SV (DEL)	43365	20	63	HGSVC (Freeze 4)	pbsv	HiFi	szro-50-200	all	0.31746
HG00733	5	SV (DEL)	43365	20	62	HGSVC (Freeze 4)	pbsv	HiFi	szro-50-200	notr	0.322581
HG00733	5	SV (INS)	12657	1	40	HGSVC (Freeze 4)	pbsv	HiFi	szro-50-200	all	0.025
HG00733	5	SV (INS)	12657	1	36	HGSVC (Freeze 4)	pbsv	HiFi	szro-50-200	notr	0.0277778
HG00733	5	SV (DEL)	47783	28	63	HGSVC (Freeze 4)	sniffles	HiFi	szro-50-200	all	0.444444
HG00733	5	SV (DEL)	47783	28	62	HGSVC (Freeze 4)	sniffles	HiFi	szro-50-200	notr	0.451613
HG00733	5	SV (INS)	16980	8	40	HGSVC (Freeze 4)	sniffles	HiFi	szro-50-200	all	0.2
HG00733	5	SV (INS)	16980	7	36	HGSVC (Freeze 4)	sniffles	HiFi	szro-50-200	notr	0.194444
HG00733	5	SV (DEL)	43365	16	63	HGSVC (Freeze 4)	svim	HiFi	szro-50-200	all	0.253968
HG00733	5	SV (DEL)	43365	16	62	HGSVC (Freeze 4)	svim	HiFi	szro-50-200	notr	0.258065
HG00733	5	SV (INS)	12657	1	40	HGSVC (Freeze 4)	svim	HiFi	szro-50-200	all	0.025
HG00733	5	SV (INS)	12657	1	36	HGSVC (Freeze 4)	svim	HiFi	szro-50-200	notr	0.0277778
HG00733	5	SV (DEL)	9734	0	63	HGSVC (Freeze 4)	delly	HiFi	szro-50-200	all	0
HG00733	5	SV (DEL)	9734	0	62	HGSVC (Freeze 4)	delly	HiFi	szro-50-200	notr	0
HG00733	5	SV (INS)	6122	0	40	HGSVC (Freeze 4)	delly	HiFi	szro-50-200	all	0
HG00733	5	SV (INS)	6122	0	36	HGSVC (Freeze 4)	delly	HiFi	szro-50-200	notr	0
HG00733	5	SV (DEL)	100115	28	63	HGSVC (Freeze 4)	cutesv	ONT	szro-50-200	all	0.444444
HG00733	5	SV (DEL)	100115	28	62	HGSVC (Freeze 4)	cutesv	ONT	szro-50-200	notr	0.451613
HG00733	5	SV (INS)	24292	9	40	HGSVC (Freeze 4)	cutesv	ONT	szro-50-200	all	0.225
HG00733	5	SV (INS)	24292	8	36	HGSVC (Freeze 4)	cutesv	ONT	szro-50-200	notr	0.222222
HG00733	5	SV (DEL)	47783	28	63	HGSVC (Freeze 4)	sniffles	ONT	szro-50-200	all	0.444444
HG00733	5	SV (DEL)	47783	28	62	HGSVC (Freeze 4)	sniffles	ONT	szro-50-200	notr	0.451613
HG00733	5	SV (INS)	16980	12	40	HGSVC (Freeze 4)	sniffles	ONT	szro-50-200	all	0.3
HG00733	5	SV (INS)	16980	10	36	HGSVC (Freeze 4)	sniffles	ONT	szro-50-200	notr	0.277778
HG00733	5	SV (DEL)	43365	14	63	HGSVC (Freeze 4)	svim	ONT	szro-50-200	all	0.222222
HG00733	5	SV (DEL)	43365	14	62	HGSVC (Freeze 4)	svim	ONT	szro-50-200	notr	0.225806
HG00733	5	SV (INS)	12657	2	40	HGSVC (Freeze 4)	svim	ONT	szro-50-200	all	0.05
HG00733	5	SV (INS)	12657	2	36	HGSVC (Freeze 4)	svim	ONT	szro-50-200	notr	0.0555556
HG00733	5	SV (DEL)	9707	0	63	HGSVC (Freeze 4)	delly	ONT	szro-50-200	all	0
HG00733	5	SV (DEL)	9707	0	62	HGSVC (Freeze 4)	delly	ONT	szro-50-200	notr	0
HG00733	5	SV (INS)	6122	0	40	HGSVC (Freeze 4)	delly	ONT	szro-50-200	all	0
HG00733	5	SV (INS)	6122	0	36	HGSVC (Freeze 4)	delly	ONT	szro-50-200	notr	0
HG00733	5	SV (DEL)	100115	26	63	HGSVC (Freeze 4)	cutesv	UL-ONT	szro-50-200	all	0.412698
HG00733	5	SV (DEL)	100115	26	62	HGSVC (Freeze 4)	cutesv	UL-ONT	szro-50-200	notr	0.419355
HG00733	5	SV (INS)	32251	17	40	HGSVC (Freeze 4)	cutesv	UL-ONT	szro-50-200	all	0.425
HG00733	5	SV (INS)	32251	13	36	HGSVC (Freeze 4)	cutesv	UL-ONT	szro-50-200	notr	0.361111
HG00733	5	SV (DEL)	47783	25	63	HGSVC (Freeze 4)	sniffles	UL-ONT	szro-50-200	all	0.396825
HG00733	5	SV (DEL)	47783	25	62	HGSVC (Freeze 4)	sniffles	UL-ONT	szro-50-200	notr	0.403226
HG00733	5	SV (INS)	32251	18	40	HGSVC (Freeze 4)	sniffles	UL-ONT	szro-50-200	all	0.45
HG00733	5	SV (INS)	32251	14	36	HGSVC (Freeze 4)	sniffles	UL-ONT	szro-50-200	notr	0.388889
HG00733	5	SV (DEL)	47783	13	63	HGSVC (Freeze 4)	svim	UL-ONT	szro-50-200	all	0.206349
HG00733	5	SV (DEL)	47783	13	62	HGSVC (Freeze 4)	svim	UL-ONT	szro-50-200	notr	0.209677
HG00733	5	SV (INS)	32251	10	40	HGSVC (Freeze 4)	svim	UL-ONT	szro-50-200	all	0.25
HG00733	5	SV (INS)	32251	8	36	HGSVC (Freeze 4)	svim	UL-ONT	szro-50-200	notr	0.222222
HG00733	5	SV (DEL)	9905	0	63	HGSVC (Freeze 4)	delly	UL-ONT	szro-50-200	all	0
HG00733	5	SV (DEL)	9905	0	62	HGSVC (Freeze 4)	delly	UL-ONT	szro-50-200	notr	0
HG00733	5	SV (INS)	6463	0	40	HGSVC (Freeze 4)	delly	UL-ONT	szro-50-200	all	0
HG00733	5	SV (INS)	6463	0	36	HGSVC (Freeze 4)	delly	UL-ONT	szro-50-200	notr	0
HG00733	8	SV (DEL)	100115	31	63	HGSVC (Freeze 4)	cutesv	HiFi	szro-50-200	all	0.492063
HG00733	8	SV (DEL)	100115	31	62	HGSVC (Freeze 4)	cutesv	HiFi	szro-50-200	notr	0.5
HG00733	8	SV (INS)	12657	3	40	HGSVC (Freeze 4)	cutesv	HiFi	szro-50-200	all	0.075
HG00733	8	SV (INS)	12657	3	36	HGSVC (Freeze 4)	cutesv	HiFi	szro-50-200	notr	0.0833333
HG00733	8	SV (DEL)	55501	28	63	HGSVC (Freeze 4)	pbsv	HiFi	szro-50-200	all	0.444444
HG00733	8	SV (DEL)	55501	27	62	HGSVC (Freeze 4)	pbsv	HiFi	szro-50-200	notr	0.435484
HG00733	8	SV (INS)	12657	5	40	HGSVC (Freeze 4)	pbsv	HiFi	szro-50-200	all	0.125
HG00733	8	SV (INS)	12657	5	36	HGSVC (Freeze 4)	pbsv	HiFi	szro-50-200	notr	0.138889
HG00733	8	SV (DEL)	47783	35	63	HGSVC (Freeze 4)	sniffles	HiFi	szro-50-200	all	0.555556
HG00733	8	SV (DEL)	47783	35	62	HGSVC (Freeze 4)	sniffles	HiFi	szro-50-200	notr	0.564516
HG00733	8	SV (INS)	14345	12	40	HGSVC (Freeze 4)	sniffles	HiFi	szro-50-200	all	0.3
HG00733	8	SV (INS)	12657	9	36	HGSVC (Freeze 4)	sniffles	HiFi	szro-50-200	notr	0.25
HG00733	8	SV (DEL)	47783	23	63	HGSVC (Freeze 4)	svim	HiFi	szro-50-200	all	0.365079
HG00733	8	SV (DEL)	47783	23	62	HGSVC (Freeze 4)	svim	HiFi	szro-50-200	notr	0.370968
HG00733	8	SV (INS)	12657	3	40	HGSVC (Freeze 4)	svim	HiFi	szro-50-200	all	0.075
HG00733	8	SV (INS)	12657	3	36	HGSVC (Freeze 4)	svim	HiFi	szro-50-200	notr	0.0833333
HG00733	8	SV (DEL)	9734	0	63	HGSVC (Freeze 4)	delly	HiFi	szro-50-200	all	0
HG00733	8	SV (DEL)	9734	0	62	HGSVC (Freeze 4)	delly	HiFi	szro-50-200	notr	0
HG00733	8	SV (INS)	6140	0	40	HGSVC (Freeze 4)	delly	HiFi	szro-50-200	all	0
HG00733	8	SV (INS)	6140	0	36	HGSVC (Freeze 4)	delly	HiFi	szro-50-200	notr	0
HG00733	8	SV (DEL)	100115	32	63	HGSVC (Freeze 4)	cutesv	ONT	szro-50-200	all	0.507937
HG00733	8	SV (DEL)	100115	32	62	HGSVC (Freeze 4)	cutesv	ONT	szro-50-200	notr	0.516129
HG00733	8	SV (INS)	18041	4	40	HGSVC (Freeze 4)	cutesv	ONT	szro-50-200	all	0.1
HG00733	8	SV (INS)	12142	3	36	HGSVC (Freeze 4)	cutesv	ONT	szro-50-200	notr	0.0833333
HG00733	8	SV (DEL)	47783	33	63	HGSVC (Freeze 4)	sniffles	ONT	szro-50-200	all	0.52381
HG00733	8	SV (DEL)	47783	33	62	HGSVC (Freeze 4)	sniffles	ONT	szro-50-200	notr	0.532258
HG00733	8	SV (INS)	20380	17	40	HGSVC (Freeze 4)	sniffles	ONT	szro-50-200	all	0.425
HG00733	8	SV (INS)	20380	14	36	HGSVC (Freeze 4)	sniffles	ONT	szro-50-200	notr	0.388889
HG00733	8	SV (DEL)	43365	28	63	HGSVC (Freeze 4)	svim	ONT	szro-50-200	all	0.444444
HG00733	8	SV (DEL)	43365	28	62	HGSVC (Freeze 4)	svim	ONT	szro-50-200	notr	0.451613
HG00733	8	SV (INS)	16980	4	40	HGSVC (Freeze 4)	svim	ONT	szro-50-200	all	0.1
HG00733	8	SV (INS)	16980	4	36	HGSVC (Freeze 4)	svim	ONT	szro-50-200	notr	0.111111
HG00733	8	SV (DEL)	9734	0	63	HGSVC (Freeze 4)	delly	ONT	szro-50-200	all	0
HG00733	8	SV (DEL)	9734	0	62	HGSVC (Freeze 4)	delly	ONT	szro-50-200	notr	0
HG00733	8	SV (INS)	6517	0	40	HGSVC (Freeze 4)	delly	ONT	szro-50-200	all	0
HG00733	8	SV (INS)	6517	0	36	HGSVC (Freeze 4)	delly	ONT	szro-50-200	notr	0
HG00733	8	SV (DEL)	74461	22	63	HGSVC (Freeze 4)	cutesv	UL-ONT	szro-50-200	all	0.349206
HG00733	8	SV (DEL)	74461	22	62	HGSVC (Freeze 4)	cutesv	UL-ONT	szro-50-200	notr	0.354839
HG00733	8	SV (INS)	20949	15	40	HGSVC (Freeze 4)	cutesv	UL-ONT	szro-50-200	all	0.375
HG00733	8	SV (INS)	20949	11	36	HGSVC (Freeze 4)	cutesv	UL-ONT	szro-50-200	notr	0.305556
HG00733	8	SV (DEL)	47783	31	63	HGSVC (Freeze 4)	sniffles	UL-ONT	szro-50-200	all	0.492063
HG00733	8	SV (DEL)	47783	31	62	HGSVC (Freeze 4)	sniffles	UL-ONT	szro-50-200	notr	0.5
HG00733	8	SV (INS)	32251	22	40	HGSVC (Freeze 4)	sniffles	UL-ONT	szro-50-200	all	0.55
HG00733	8	SV (INS)	32251	18	36	HGSVC (Freeze 4)	sniffles	UL-ONT	szro-50-200	notr	0.5
HG00733	8	SV (DEL)	47783	21	63	HGSVC (Freeze 4)	svim	UL-ONT	szro-50-200	all	0.333333
HG00733	8	SV (DEL)	47783	21	62	HGSVC (Freeze 4)	svim	UL-ONT	szro-50-200	notr	0.33871
HG00733	8	SV (INS)	20949	15	40	HGSVC (Freeze 4)	svim	UL-ONT	szro-50-200	all	0.375
HG00733	8	SV (INS)	20949	12	36	HGSVC (Freeze 4)	svim	UL-ONT	szro-50-200	notr	0.333333
HG00733	8	SV (DEL)	9734	0	63	HGSVC (Freeze 4)	delly	UL-ONT	szro-50-200	all	0
HG00733	8	SV (DEL)	9734	0	62	HGSVC (Freeze 4)	delly	UL-ONT	szro-50-200	notr	0
HG00733	8	SV (INS)	6140	0	40	HGSVC (Freeze 4)	delly	UL-ONT	szro-50-200	all	0
HG00733	8	SV (INS)	6140	0	36	HGSVC (Freeze 4)	delly	UL-ONT	szro-50-200	notr	0
HG00733	10	SV (DEL)	100115	36	63	HGSVC (Freeze 4)	cutesv	HiFi	szro-50-200	all	0.571429
HG00733	10	SV (DEL)	100115	36	62	HGSVC (Freeze 4)	cutesv	HiFi	szro-50-200	notr	0.580645
HG00733	10	SV (INS)	12597	4	40	HGSVC (Freeze 4)	cutesv	HiFi	szro-50-200	all	0.1
HG00733	10	SV (INS)	12597	4	36	HGSVC (Freeze 4)	cutesv	HiFi	szro-50-200	notr	0.111111
HG00733	10	SV (DEL)	55501	33	63	HGSVC (Freeze 4)	pbsv	HiFi	szro-50-200	all	0.52381
HG00733	10	SV (DEL)	55501	33	62	HGSVC (Freeze 4)	pbsv	HiFi	szro-50-200	notr	0.532258
HG00733	10	SV (INS)	12657	4	40	HGSVC (Freeze 4)	pbsv	HiFi	szro-50-200	all	0.1
HG00733	10	SV (INS)	12657	4	36	HGSVC (Freeze 4)	pbsv	HiFi	szro-50-200	notr	0.111111
HG00733	10	SV (DEL)	47783	34	63	HGSVC (Freeze 4)	sniffles	HiFi	szro-50-200	all	0.539683
HG00733	10	SV (DEL)	47783	34	62	HGSVC (Freeze 4)	sniffles	HiFi	szro-50-200	notr	0.548387
HG00733	10	SV (INS)	14345	13	40	HGSVC (Freeze 4)	sniffles	HiFi	szro-50-200	all	0.325
HG00733	10	SV (INS)	12657	9	36	HGSVC (Freeze 4)	sniffles	HiFi	szro-50-200	notr	0.25
HG00733	10	SV (DEL)	47783	33	63	HGSVC (Freeze 4)	svim	HiFi	szro-50-200	all	0.52381
HG00733	10	SV (DEL)	47783	33	62	HGSVC (Freeze 4)	svim	HiFi	szro-50-200	notr	0.532258
HG00733	10	SV (INS)	9561	0	40	HGSVC (Freeze 4)	svim	HiFi	szro-50-200	all	0
HG00733	10	SV (INS)	9561	0	36	HGSVC (Freeze 4)	svim	HiFi	szro-50-200	notr	0
HG00733	10	SV (DEL)	9734	0	63	HGSVC (Freeze 4)	delly	HiFi	szro-50-200	all	0
HG00733	10	SV (DEL)	9734	0	62	HGSVC (Freeze 4)	delly	HiFi	szro-50-200	notr	0
HG00733	10	SV (INS)	6140	0	40	HGSVC (Freeze 4)	delly	HiFi	szro-50-200	all	0
HG00733	10	SV (INS)	6140	0	36	HGSVC (Freeze 4)	delly	HiFi	szro-50-200	notr	0
HG00733	10	SV (DEL)	100115	31	63	HGSVC (Freeze 4)	cutesv	ONT	szro-50-200	all	0.492063
HG00733	10	SV (DEL)	100115	31	62	HGSVC (Freeze 4)	cutesv	ONT	szro-50-200	notr	0.5
HG00733	10	SV (INS)	14345	7	40	HGSVC (Freeze 4)	cutesv	ONT	szro-50-200	all	0.175
HG00733	10	SV (INS)	12657	5	36	HGSVC (Freeze 4)	cutesv	ONT	szro-50-200	notr	0.138889
HG00733	10	SV (DEL)	47783	35	63	HGSVC (Freeze 4)	sniffles	ONT	szro-50-200	all	0.555556
HG00733	10	SV (DEL)	47783	35	62	HGSVC (Freeze 4)	sniffles	ONT	szro-50-200	notr	0.564516
HG00733	10	SV (INS)	20380	19	40	HGSVC (Freeze 4)	sniffles	ONT	szro-50-200	all	0.475
HG00733	10	SV (INS)	20380	15	36	HGSVC (Freeze 4)	sniffles	ONT	szro-50-200	notr	0.416667
HG00733	10	SV (DEL)	47783	28	63	HGSVC (Freeze 4)	svim	ONT	szro-50-200	all	0.444444
HG00733	10	SV (DEL)	47783	28	62	HGSVC (Freeze 4)	svim	ONT	szro-50-200	notr	0.451613
HG00733	10	SV (INS)	14345	6	40	HGSVC (Freeze 4)	svim	ONT	szro-50-200	all	0.15
HG00733	10	SV (INS)	12657	4	36	HGSVC (Freeze 4)	svim	ONT	szro-50-200	notr	0.111111
HG00733	10	SV (DEL)	9905	0	63	HGSVC (Freeze 4)	delly	ONT	szro-50-200	all	0
HG00733	10	SV (DEL)	9905	0	62	HGSVC (Freeze 4)	delly	ONT	szro-50-200	notr	0
HG00733	10	SV (INS)	6160	0	40	HGSVC (Freeze 4)	delly	ONT	szro-50-200	all	0
HG00733	10	SV (INS)	6160	0	36	HGSVC (Freeze 4)	delly	ONT	szro-50-200	notr	0
HG00733	10	SV (DEL)	100115	31	63	HGSVC (Freeze 4)	cutesv	UL-ONT	szro-50-200	all	0.492063
HG00733	10	SV (DEL)	100115	30	62	HGSVC (Freeze 4)	cutesv	UL-ONT	szro-50-200	notr	0.483871
HG00733	10	SV (INS)	24292	18	40	HGSVC (Freeze 4)	cutesv	UL-ONT	szro-50-200	all	0.45
HG00733	10	SV (INS)	24292	14	36	HGSVC (Freeze 4)	cutesv	UL-ONT	szro-50-200	notr	0.388889
HG00733	10	SV (DEL)	47783	35	63	HGSVC (Freeze 4)	sniffles	UL-ONT	szro-50-200	all	0.555556
HG00733	10	SV (DEL)	47783	35	62	HGSVC (Freeze 4)	sniffles	UL-ONT	szro-50-200	notr	0.564516
HG00733	10	SV (INS)	30815	23	40	HGSVC (Freeze 4)	sniffles	UL-ONT	szro-50-200	all	0.575
HG00733	10	SV (INS)	30815	18	36	HGSVC (Freeze 4)	sniffles	UL-ONT	szro-50-200	notr	0.5
HG00733	10	SV (DEL)	47783	31	63	HGSVC (Freeze 4)	svim	UL-ONT	szro-50-200	all	0.492063
HG00733	10	SV (DEL)	47783	30	62	HGSVC (Freeze 4)	svim	UL-ONT	szro-50-200	notr	0.483871
HG00733	10	SV (INS)	20949	18	40	HGSVC (Freeze 4)	svim	UL-ONT	szro-50-200	all	0.45
HG00733	10	SV (INS)	20949	13	36	HGSVC (Freeze 4)	svim	UL-ONT	szro-50-200	notr	0.361111
HG00733	10	SV (DEL)	9734	0	63	HGSVC (Freeze 4)	delly	UL-ONT	szro-50-200	all	0
HG00733	10	SV (DEL)	9734	0	62	HGSVC (Freeze 4)	delly	UL-ONT	szro-50-200	notr	0
HG00733	10	SV (INS)	6140	0	40	HGSVC (Freeze 4)	delly	UL-ONT	szro-50-200	all	0
HG00733	10	SV (INS)	6140	0	36	HGSVC (Freeze 4)	delly	UL-ONT	szro-50-200	notr	0
HG00733	12	SV (DEL)	100115	37	63	HGSVC (Freeze 4)	cutesv	HiFi	szro-50-200	all	0.587302
HG00733	12	SV (DEL)	100115	37	62	HGSVC (Freeze 4)	cutesv	HiFi	szro-50-200	notr	0.596774
HG00733	12	SV (INS)	12597	4	40	HGSVC (Freeze 4)	cutesv	HiFi	szro-50-200	all	0.1
HG00733	12	SV (INS)	12597	4	36	HGSVC (Freeze 4)	cutesv	HiFi	szro-50-200	notr	0.111111
HG00733	12	SV (DEL)	55501	36	63	HGSVC (Freeze 4)	pbsv	HiFi	szro-50-200	all	0.571429
HG00733	12	SV (DEL)	55501	36	62	HGSVC (Freeze 4)	pbsv	HiFi	szro-50-200	notr	0.580645
HG00733	12	SV (INS)	14921	9	40	HGSVC (Freeze 4)	pbsv	HiFi	szro-50-200	all	0.225
HG00733	12	SV (INS)	14921	8	36	HGSVC (Freeze 4)	pbsv	HiFi	szro-50-200	notr	0.222222
HG00733	12	SV (DEL)	47783	35	63	HGSVC (Freeze 4)	sniffles	HiFi	szro-50-200	all	0.555556
HG00733	12	SV (DEL)	47783	35	62	HGSVC (Freeze 4)	sniffles	HiFi	szro-50-200	notr	0.564516
HG00733	12	SV (INS)	14921	13	40	HGSVC (Freeze 4)	sniffles	HiFi	szro-50-200	all	0.325
HG00733	12	SV (INS)	14921	11	36	HGSVC (Freeze 4)	sniffles	HiFi	szro-50-200	notr	0.305556
HG00733	12	SV (DEL)	47783	34	63	HGSVC (Freeze 4)	svim	HiFi	szro-50-200	all	0.539683
HG00733	12	SV (DEL)	47783	34	62	HGSVC (Freeze 4)	svim	HiFi	szro-50-200	notr	0.548387
HG00733	12	SV (INS)	10490	1	40	HGSVC (Freeze 4)	svim	HiFi	szro-50-200	all	0.025
HG00733	12	SV (INS)	10490	1	36	HGSVC (Freeze 4)	svim	HiFi	szro-50-200	notr	0.0277778
HG00733	12	SV (DEL)	9905	0	63	HGSVC (Freeze 4)	delly	HiFi	szro-50-200	all	0
HG00733	12	SV (DEL)	9905	0	62	HGSVC (Freeze 4)	delly	HiFi	szro-50-200	notr	0
HG00733	12	SV (INS)	6160	0	40	HGSVC (Freeze 4)	delly	HiFi	szro-50-200	all	0
HG00733	12	SV (INS)	6160	0	36	HGSVC (Freeze 4)	delly	HiFi	szro-50-200	notr	0
HG00733	12	SV (DEL)	100115	28	63	HGSVC (Freeze 4)	cutesv	ONT	szro-50-200	all	0.444444
HG00733	12	SV (DEL)	100115	28	62	HGSVC (Freeze 4)	cutesv	ONT	szro-50-200	notr	0.451613
HG00733	12	SV (INS)	20949	7	40	HGSVC (Freeze 4)	cutesv	ONT	szro-50-200	all	0.175
HG00733	12	SV (INS)	20949	7	36	HGSVC (Freeze 4)	cutesv	ONT	szro-50-200	notr	0.194444
HG00733	12	SV (DEL)	47783	37	63	HGSVC (Freeze 4)	sniffles	ONT	szro-50-200	all	0.587302
HG00733	12	SV (DEL)	47783	37	62	HGSVC (Freeze 4)	sniffles	ONT	szro-50-200	notr	0.596774
HG00733	12	SV (INS)	32251	19	40	HGSVC (Freeze 4)	sniffles	ONT	szro-50-200	all	0.475
HG00733	12	SV (INS)	32251	15	36	HGSVC (Freeze 4)	sniffles	ONT	szro-50-200	notr	0.416667
HG00733	12	SV (DEL)	47783	25	63	HGSVC (Freeze 4)	svim	ONT	szro-50-200	all	0.396825
HG00733	12	SV (DEL)	47783	25	62	HGSVC (Freeze 4)	svim	ONT	szro-50-200	notr	0.403226
HG00733	12	SV (INS)	12657	6	40	HGSVC (Freeze 4)	svim	ONT	szro-50-200	all	0.15
HG00733	12	SV (INS)	12657	6	36	HGSVC (Freeze 4)	svim	ONT	szro-50-200	notr	0.166667
HG00733	12	SV (DEL)	9905	0	63	HGSVC (Freeze 4)	delly	ONT	szro-50-200	all	0
HG00733	12	SV (DEL)	9905	0	62	HGSVC (Freeze 4)	delly	ONT	szro-50-200	notr	0
HG00733	12	SV (INS)	6160	0	40	HGSVC (Freeze 4)	delly	ONT	szro-50-200	all	0
HG00733	12	SV (INS)	6160	0	36	HGSVC (Freeze 4)	delly	ONT	szro-50-200	notr	0
HG00733	12	SV (DEL)	100115	30	63	HGSVC (Freeze 4)	cutesv	UL-ONT	szro-50-200	all	0.47619
HG00733	12	SV (DEL)	100115	29	62	HGSVC (Freeze 4)	cutesv	UL-ONT	szro-50-200	notr	0.467742
HG00733	12	SV (INS)	24292	18	40	HGSVC (Freeze 4)	cutesv	UL-ONT	szro-50-200	all	0.45
HG00733	12	SV (INS)	24292	14	36	HGSVC (Freeze 4)	cutesv	UL-ONT	szro-50-200	notr	0.388889
HG00733	12	SV (DEL)	238803	36	63	HGSVC (Freeze 4)	sniffles	UL-ONT	szro-50-200	all	0.571429
HG00733	12	SV (DEL)	238803	36	62	HGSVC (Freeze 4)	sniffles	UL-ONT	szro-50-200	notr	0.580645
HG00733	12	SV (INS)	32251	25	40	HGSVC (Freeze 4)	sniffles	UL-ONT	szro-50-200	all	0.625
HG00733	12	SV (INS)	32251	20	36	HGSVC (Freeze 4)	sniffles	UL-ONT	szro-50-200	notr	0.555556
HG00733	12	SV (DEL)	47783	26	63	HGSVC (Freeze 4)	svim	UL-ONT	szro-50-200	all	0.412698
HG00733	12	SV (DEL)	47783	25	62	HGSVC (Freeze 4)	svim	UL-ONT	szro-50-200	notr	0.403226
HG00733	12	SV (INS)	20949	16	40	HGSVC (Freeze 4)	svim	UL-ONT	szro-50-200	all	0.4
HG00733	12	SV (INS)	20949	13	36	HGSVC (Freeze 4)	svim	UL-ONT	szro-50-200	notr	0.361111
HG00733	12	SV (DEL)	9905	0	63	HGSVC (Freeze 4)	delly	UL-ONT	szro-50-200	all	0
HG00733	12	SV (DEL)	9905	0	62	HGSVC (Freeze 4)	delly	UL-ONT	szro-50-200	notr	0
HG00733	12	SV (INS)	6160	0	40	HGSVC (Freeze 4)	delly	UL-ONT	szro-50-200	all	0
HG00733	12	SV (INS)	6160	0	36	HGSVC (Freeze 4)	delly	UL-ONT	szro-50-200	notr	0
HG00733	15	SV (DEL)	100115	36	63	HGSVC (Freeze 4)	cutesv	HiFi	szro-50-200	all	0.571429
HG00733	15	SV (DEL)	100115	36	62	HGSVC (Freeze 4)	cutesv	HiFi	szro-50-200	notr	0.580645
HG00733	15	SV (INS)	12597	5	40	HGSVC (Freeze 4)	cutesv	HiFi	szro-50-200	all	0.125
HG00733	15	SV (INS)	12597	4	36	HGSVC (Freeze 4)	cutesv	HiFi	szro-50-200	notr	0.111111
HG00733	15	SV (DEL)	55501	35	63	HGSVC (Freeze 4)	pbsv	HiFi	szro-50-200	all	0.555556
HG00733	15	SV (DEL)	55501	35	62	HGSVC (Freeze 4)	pbsv	HiFi	szro-50-200	notr	0.564516
HG00733	15	SV (INS)	12657	8	40	HGSVC (Freeze 4)	pbsv	HiFi	szro-50-200	all	0.2
HG00733	15	SV (INS)	12657	7	36	HGSVC (Freeze 4)	pbsv	HiFi	szro-50-200	notr	0.194444
HG00733	15	SV (DEL)	47783	36	63	HGSVC (Freeze 4)	sniffles	HiFi	szro-50-200	all	0.571429
HG00733	15	SV (DEL)	47783	36	62	HGSVC (Freeze 4)	sniffles	HiFi	szro-50-200	notr	0.580645
HG00733	15	SV (INS)	12843	11	40	HGSVC (Freeze 4)	sniffles	HiFi	szro-50-200	all	0.275
HG00733	15	SV (INS)	12843	9	36	HGSVC (Freeze 4)	sniffles	HiFi	szro-50-200	notr	0.25
HG00733	15	SV (DEL)	47783	33	63	HGSVC (Freeze 4)	svim	HiFi	szro-50-200	all	0.52381
HG00733	15	SV (DEL)	47783	33	62	HGSVC (Freeze 4)	svim	HiFi	szro-50-200	notr	0.532258
HG00733	15	SV (INS)	12597	5	40	HGSVC (Freeze 4)	svim	HiFi	szro-50-200	all	0.125
HG00733	15	SV (INS)	12597	4	36	HGSVC (Freeze 4)	svim	HiFi	szro-50-200	notr	0.111111
HG00733	15	SV (DEL)	9734	0	63	HGSVC (Freeze 4)	delly	HiFi	szro-50-200	all	0
HG00733	15	SV (DEL)	9734	0	62	HGSVC (Freeze 4)	delly	HiFi	szro-50-200	notr	0
HG00733	15	SV (INS)	6160	0	40	HGSVC (Freeze 4)	delly	HiFi	szro-50-200	all	0
HG00733	15	SV (INS)	6160	0	36	HGSVC (Freeze 4)	delly	HiFi	szro-50-200	notr	0
HG00733	15	SV (DEL)	100115	28	63	HGSVC (Freeze 4)	cutesv	ONT	szro-50-200	all	0.444444
HG00733	15	SV (DEL)	100115	28	62	HGSVC (Freeze 4)	cutesv	ONT	szro-50-200	notr	0.451613
HG00733	15	SV (INS)	14345	12	40	HGSVC (Freeze 4)	cutesv	ONT	szro-50-200	all	0.3
HG00733	15	SV (INS)	12657	9	36	HGSVC (Freeze 4)	cutesv	ONT	szro-50-200	notr	0.25
HG00733	15	SV (DEL)	47783	36	63	HGSVC (Freeze 4)	sniffles	ONT	szro-50-200	all	0.571429
HG00733	15	SV (DEL)	47783	36	62	HGSVC (Freeze 4)	sniffles	ONT	szro-50-200	notr	0.580645
HG00733	15	SV (INS)	18041	18	40	HGSVC (Freeze 4)	sniffles	ONT	szro-50-200	all	0.45
HG00733	15	SV (INS)	16639	13	36	HGSVC (Freeze 4)	sniffles	ONT	szro-50-200	notr	0.361111
HG00733	15	SV (DEL)	43365	25	63	HGSVC (Freeze 4)	svim	ONT	szro-50-200	all	0.396825
HG00733	15	SV (DEL)	43365	25	62	HGSVC (Freeze 4)	svim	ONT	szro-50-200	notr	0.403226
HG00733	15	SV (INS)	14345	9	40	HGSVC (Freeze 4)	svim	ONT	szro-50-200	all	0.225
HG00733	15	SV (INS)	12657	8	36	HGSVC (Freeze 4)	svim	ONT	szro-50-200	notr	0.222222
HG00733	15	SV (DEL)	9905	0	63	HGSVC (Freeze 4)	delly	ONT	szro-50-200	all	0
HG00733	15	SV (DEL)	9905	0	62	HGSVC (Freeze 4)	delly	ONT	szro-50-200	notr	0
HG00733	15	SV (INS)	6160	0	40	HGSVC (Freeze 4)	delly	ONT	szro-50-200	all	0
HG00733	15	SV (INS)	6160	0	36	HGSVC (Freeze 4)	delly	ONT	szro-50-200	notr	0
HG00733	15	SV (DEL)	100115	32	63	HGSVC (Freeze 4)	cutesv	UL-ONT	szro-50-200	all	0.507937
HG00733	15	SV (DEL)	100115	32	62	HGSVC (Freeze 4)	cutesv	UL-ONT	szro-50-200	notr	0.516129
HG00733	15	SV (INS)	24292	18	40	HGSVC (Freeze 4)	cutesv	UL-ONT	szro-50-200	all	0.45
HG00733	15	SV (INS)	24292	14	36	HGSVC (Freeze 4)	cutesv	UL-ONT	szro-50-200	notr	0.388889
HG00733	15	SV (DEL)	47783	37	63	HGSVC (Freeze 4)	sniffles	UL-ONT	szro-50-200	all	0.587302
HG00733	15	SV (DEL)	47783	37	62	HGSVC (Freeze 4)	sniffles	UL-ONT	szro-50-200	notr	0.596774
HG00733	15	SV (INS)	30815	23	40	HGSVC (Freeze 4)	sniffles	UL-ONT	szro-50-200	all	0.575
HG00733	15	SV (INS)	30815	19	36	HGSVC (Freeze 4)	sniffles	UL-ONT	szro-50-200	notr	0.527778
HG00733	15	SV (DEL)	47783	32	63	HGSVC (Freeze 4)	svim	UL-ONT	szro-50-200	all	0.507937
HG00733	15	SV (DEL)	47783	31	62	HGSVC (Freeze 4)	svim	UL-ONT	szro-50-200	notr	0.5
HG00733	15	SV (INS)	20949	17	40	HGSVC (Freeze 4)	svim	UL-ONT	szro-50-200	all	0.425
HG00733	15	SV (INS)	20949	13	36	HGSVC (Freeze 4)	svim	UL-ONT	szro-50-200	notr	0.361111
HG00733	15	SV (DEL)	9905	0	63	HGSVC (Freeze 4)	delly	UL-ONT	szro-50-200	all	0
HG00733	15	SV (DEL)	9905	0	62	HGSVC (Freeze 4)	delly	UL-ONT	szro-50-200	notr	0
HG00733	15	SV (INS)	6140	0	40	HGSVC (Freeze 4)	delly	UL-ONT	szro-50-200	all	0
HG00733	15	SV (INS)	6140	0	36	HGSVC (Freeze 4)	delly	UL-ONT	szro-50-200	notr	0
HG00733	17	SV (DEL)	100115	38	63	HGSVC (Freeze 4)	cutesv	HiFi	szro-50-200	all	0.603175
HG00733	17	SV (DEL)	100115	38	62	HGSVC (Freeze 4)	cutesv	HiFi	szro-50-200	notr	0.612903
HG00733	17	SV (INS)	14345	7	40	HGSVC (Freeze 4)	cutesv	HiFi	szro-50-200	all	0.175
HG00733	17	SV (INS)	12657	6	36	HGSVC (Freeze 4)	cutesv	HiFi	szro-50-200	notr	0.166667
HG00733	17	SV (DEL)	55501	38	63	HGSVC (Freeze 4)	pbsv	HiFi	szro-50-200	all	0.603175
HG00733	17	SV (DEL)	55501	38	62	HGSVC (Freeze 4)	pbsv	HiFi	szro-50-200	notr	0.612903
HG00733	17	SV (INS)	14345	8	40	HGSVC (Freeze 4)	pbsv	HiFi	szro-50-200	all	0.2
HG00733	17	SV (INS)	12657	7	36	HGSVC (Freeze 4)	pbsv	HiFi	szro-50-200	notr	0.194444
HG00733	17	SV (DEL)	47783	35	63	HGSVC (Freeze 4)	sniffles	HiFi	szro-50-200	all	0.555556
HG00733	17	SV (DEL)	47783	35	62	HGSVC (Freeze 4)	sniffles	HiFi	szro-50-200	notr	0.564516
HG00733	17	SV (INS)	14345	12	40	HGSVC (Freeze 4)	sniffles	HiFi	szro-50-200	all	0.3
HG00733	17	SV (INS)	12657	10	36	HGSVC (Freeze 4)	sniffles	HiFi	szro-50-200	notr	0.277778
HG00733	17	SV (DEL)	47783	33	63	HGSVC (Freeze 4)	svim	HiFi	szro-50-200	all	0.52381
HG00733	17	SV (DEL)	47783	33	62	HGSVC (Freeze 4)	svim	HiFi	szro-50-200	notr	0.532258
HG00733	17	SV (INS)	12657	3	40	HGSVC (Freeze 4)	svim	HiFi	szro-50-200	all	0.075
HG00733	17	SV (INS)	12657	3	36	HGSVC (Freeze 4)	svim	HiFi	szro-50-200	notr	0.0833333
HG00733	17	SV (DEL)	9905	0	63	HGSVC (Freeze 4)	delly	HiFi	szro-50-200	all	0
HG00733	17	SV (DEL)	9905	0	62	HGSVC (Freeze 4)	delly	HiFi	szro-50-200	notr	0
HG00733	17	SV (INS)	8323	0	40	HGSVC (Freeze 4)	delly	HiFi	szro-50-200	all	0
HG00733	17	SV (INS)	8323	0	36	HGSVC (Freeze 4)	delly	HiFi	szro-50-200	notr	0
HG00733	17	SV (DEL)	100115	34	63	HGSVC (Freeze 4)	cutesv	ONT	szro-50-200	all	0.539683
HG00733	17	SV (DEL)	100115	34	62	HGSVC (Freeze 4)	cutesv	ONT	szro-50-200	notr	0.548387
HG00733	17	SV (INS)	15193	10	40	HGSVC (Freeze 4)	cutesv	ONT	szro-50-200	all	0.25
HG00733	17	SV (INS)	15193	9	36	HGSVC (Freeze 4)	cutesv	ONT	szro-50-200	notr	0.25
HG00733	17	SV (DEL)	47783	35	63	HGSVC (Freeze 4)	sniffles	ONT	szro-50-200	all	0.555556
HG00733	17	SV (DEL)	47783	35	62	HGSVC (Freeze 4)	sniffles	ONT	szro-50-200	notr	0.564516
HG00733	17	SV (INS)	32251	22	40	HGSVC (Freeze 4)	sniffles	ONT	szro-50-200	all	0.55
HG00733	17	SV (INS)	32251	18	36	HGSVC (Freeze 4)	sniffles	ONT	szro-50-200	notr	0.5
HG00733	17	SV (DEL)	47783	33	63	HGSVC (Freeze 4)	svim	ONT	szro-50-200	all	0.52381
HG00733	17	SV (DEL)	47783	33	62	HGSVC (Freeze 4)	svim	ONT	szro-50-200	notr	0.532258
HG00733	17	SV (INS)	15193	8	40	HGSVC (Freeze 4)	svim	ONT	szro-50-200	all	0.2
HG00733	17	SV (INS)	15193	8	36	HGSVC (Freeze 4)	svim	ONT	szro-50-200	notr	0.222222
HG00733	17	SV (DEL)	9905	0	63	HGSVC (Freeze 4)	delly	ONT	szro-50-200	all	0
HG00733	17	SV (DEL)	9905	0	62	HGSVC (Freeze 4)	delly	ONT	szro-50-200	notr	0
HG00733	17	SV (INS)	6233	0	40	HGSVC (Freeze 4)	delly	ONT	szro-50-200	all	0
HG00733	17	SV (INS)	6160	0	36	HGSVC (Freeze 4)	delly	ONT	szro-50-200	notr	0
HG00733	17	SV (DEL)	100115	36	63	HGSVC (Freeze 4)	cutesv	UL-ONT	szro-50-200	all	0.571429
HG00733	17	SV (DEL)	100115	36	62	HGSVC (Freeze 4)	cutesv	UL-ONT	szro-50-200	notr	0.580645
HG00733	17	SV (INS)	24292	21	40	HGSVC (Freeze 4)	cutesv	UL-ONT	szro-50-200	all	0.525
HG00733	17	SV (INS)	24292	16	36	HGSVC (Freeze 4)	cutesv	UL-ONT	szro-50-200	notr	0.444444
HG00733	17	SV (DEL)	47783	37	63	HGSVC (Freeze 4)	sniffles	UL-ONT	szro-50-200	all	0.587302
HG00733	17	SV (DEL)	47783	37	62	HGSVC (Freeze 4)	sniffles	UL-ONT	szro-50-200	notr	0.596774
HG00733	17	SV (INS)	32251	24	40	HGSVC (Freeze 4)	sniffles	UL-ONT	szro-50-200	all	0.6
HG00733	17	SV (INS)	32251	19	36	HGSVC (Freeze 4)	sniffles	UL-ONT	szro-50-200	notr	0.527778
HG00733	17	SV (DEL)	47783	33	63	HGSVC (Freeze 4)	svim	UL-ONT	szro-50-200	all	0.52381
HG00733	17	SV (DEL)	47783	33	62	HGSVC (Freeze 4)	svim	UL-ONT	szro-50-200	notr	0.532258
HG00733	17	SV (INS)	20949	20	40	HGSVC (Freeze 4)	svim	UL-ONT	szro-50-200	all	0.5
HG00733	17	SV (INS)	20949	15	36	HGSVC (Freeze 4)	svim	UL-ONT	szro-50-200	notr	0.416667
HG00733	17	SV (DEL)	9905	0	63	HGSVC (Freeze 4)	delly	UL-ONT	szro-50-200	all	0
HG00733	17	SV (DEL)	9905	0	62	HGSVC (Freeze 4)	delly	UL-ONT	szro-50-200	notr	0
HG00733	17	SV (INS)	6160	0	40	HGSVC (Freeze 4)	delly	UL-ONT	szro-50-200	all	0
HG00733	17	SV (INS)	6160	0	36	HGSVC (Freeze 4)	delly	UL-ONT	szro-50-200	notr	0
HG00733	20	SV (DEL)	100115	39	63	HGSVC (Freeze 4)	cutesv	HiFi	szro-50-200	all	0.619048
HG00733	20	SV (DEL)	100115	39	62	HGSVC (Freeze 4)	cutesv	HiFi	szro-50-200	notr	0.629032
HG00733	20	SV (INS)	12597	7	40	HGSVC (Freeze 4)	cutesv	HiFi	szro-50-200	all	0.175
HG00733	20	SV (INS)	12597	7	36	HGSVC (Freeze 4)	cutesv	HiFi	szro-50-200	notr	0.194444
HG00733	20	SV (DEL)	55501	37	63	HGSVC (Freeze 4)	pbsv	HiFi	szro-50-200	all	0.587302
HG00733	20	SV (DEL)	55501	37	62	HGSVC (Freeze 4)	pbsv	HiFi	szro-50-200	notr	0.596774
HG00733	20	SV (INS)	12657	8	40	HGSVC (Freeze 4)	pbsv	HiFi	szro-50-200	all	0.2
HG00733	20	SV (INS)	12657	8	36	HGSVC (Freeze 4)	pbsv	HiFi	szro-50-200	notr	0.222222
HG00733	20	SV (DEL)	47783	34	63	HGSVC (Freeze 4)	sniffles	HiFi	szro-50-200	all	0.539683
HG00733	20	SV (DEL)	47783	34	62	HGSVC (Freeze 4)	sniffles	HiFi	szro-50-200	notr	0.548387
HG00733	20	SV (INS)	12657	13	40	HGSVC (Freeze 4)	sniffles	HiFi	szro-50-200	all	0.325
HG00733	20	SV (INS)	12657	10	36	HGSVC (Freeze 4)	sniffles	HiFi	szro-50-200	notr	0.277778
HG00733	20	SV (DEL)	47783	33	63	HGSVC (Freeze 4)	svim	HiFi	szro-50-200	all	0.52381
HG00733	20	SV (DEL)	47783	33	62	HGSVC (Freeze 4)	svim	HiFi	szro-50-200	notr	0.532258
HG00733	20	SV (INS)	12142	4	40	HGSVC (Freeze 4)	svim	HiFi	szro-50-200	all	0.1
HG00733	20	SV (INS)	12142	4	36	HGSVC (Freeze 4)	svim	HiFi	szro-50-200	notr	0.111111
HG00733	20	SV (DEL)	9905	0	63	HGSVC (Freeze 4)	delly	HiFi	szro-50-200	all	0
HG00733	20	SV (DEL)	9905	0	62	HGSVC (Freeze 4)	delly	HiFi	szro-50-200	notr	0
HG00733	20	SV (INS)	8323	0	40	HGSVC (Freeze 4)	delly	HiFi	szro-50-200	all	0
HG00733	20	SV (INS)	8323	0	36	HGSVC (Freeze 4)	delly	HiFi	szro-50-200	notr	0
HG00733	20	SV (DEL)	100115	35	63	HGSVC (Freeze 4)	cutesv	ONT	szro-50-200	all	0.555556
HG00733	20	SV (DEL)	100115	35	62	HGSVC (Freeze 4)	cutesv	ONT	szro-50-200	notr	0.564516
HG00733	20	SV (INS)	24292	14	40	HGSVC (Freeze 4)	cutesv	ONT	szro-50-200	all	0.35
HG00733	20	SV (INS)	24292	11	36	HGSVC (Freeze 4)	cutesv	ONT	szro-50-200	notr	0.305556
HG00733	20	SV (DEL)	47783	38	63	HGSVC (Freeze 4)	sniffles	ONT	szro-50-200	all	0.603175
HG00733	20	SV (DEL)	47783	38	62	HGSVC (Freeze 4)	sniffles	ONT	szro-50-200	notr	0.612903
HG00733	20	SV (INS)	20141	19	40	HGSVC (Freeze 4)	sniffles	ONT	szro-50-200	all	0.475
HG00733	20	SV (INS)	20141	16	36	HGSVC (Freeze 4)	sniffles	ONT	szro-50-200	notr	0.444444
HG00733	20	SV (DEL)	47783	34	63	HGSVC (Freeze 4)	svim	ONT	szro-50-200	all	0.539683
HG00733	20	SV (DEL)	47783	34	62	HGSVC (Freeze 4)	svim	ONT	szro-50-200	notr	0.548387
HG00733	20	SV (INS)	20949	12	40	HGSVC (Freeze 4)	svim	ONT	szro-50-200	all	0.3
HG00733	20	SV (INS)	20949	11	36	HGSVC (Freeze 4)	svim	ONT	szro-50-200	notr	0.305556
HG00733	20	SV (DEL)	9905	0	63	HGSVC (Freeze 4)	delly	ONT	szro-50-200	all	0
HG00733	20	SV (DEL)	9905	0	62	HGSVC (Freeze 4)	delly	ONT	szro-50-200	notr	0
HG00733	20	SV (INS)	6160	0	40	HGSVC (Freeze 4)	delly	ONT	szro-50-200	all	0
HG00733	20	SV (INS)	6160	0	36	HGSVC (Freeze 4)	delly	ONT	szro-50-200	notr	0
HG00733	20	SV (DEL)	100115	40	63	HGSVC (Freeze 4)	cutesv	UL-ONT	szro-50-200	all	0.634921
HG00733	20	SV (DEL)	100115	40	62	HGSVC (Freeze 4)	cutesv	UL-ONT	szro-50-200	notr	0.645161
HG00733	20	SV (INS)	24292	21	40	HGSVC (Freeze 4)	cutesv	UL-ONT	szro-50-200	all	0.525
HG00733	20	SV (INS)	24292	17	36	HGSVC (Freeze 4)	cutesv	UL-ONT	szro-50-200	notr	0.472222
HG00733	20	SV (DEL)	47783	40	63	HGSVC (Freeze 4)	sniffles	UL-ONT	szro-50-200	all	0.634921
HG00733	20	SV (DEL)	47783	40	62	HGSVC (Freeze 4)	sniffles	UL-ONT	szro-50-200	notr	0.645161
HG00733	20	SV (INS)	32251	24	40	HGSVC (Freeze 4)	sniffles	UL-ONT	szro-50-200	all	0.6
HG00733	20	SV (INS)	32251	19	36	HGSVC (Freeze 4)	sniffles	UL-ONT	szro-50-200	notr	0.527778
HG00733	20	SV (DEL)	47783	38	63	HGSVC (Freeze 4)	svim	UL-ONT	szro-50-200	all	0.603175
HG00733	20	SV (DEL)	47783	38	62	HGSVC (Freeze 4)	svim	UL-ONT	szro-50-200	notr	0.612903
HG00733	20	SV (INS)	20949	20	40	HGSVC (Freeze 4)	svim	UL-ONT	szro-50-200	all	0.5
HG00733	20	SV (INS)	20949	16	36	HGSVC (Freeze 4)	svim	UL-ONT	szro-50-200	notr	0.444444
HG00733	20	SV (DEL)	9905	0	63	HGSVC (Freeze 4)	delly	UL-ONT	szro-50-200	all	0
HG00733	20	SV (DEL)	9905	0	62	HGSVC (Freeze 4)	delly	UL-ONT	szro-50-200	notr	0
HG00733	20	SV (INS)	6160	0	40	HGSVC (Freeze 4)	delly	UL-ONT	szro-50-200	all	0
HG00733	20	SV (INS)	6160	0	36	HGSVC (Freeze 4)	delly	UL-ONT	szro-50-200	notr	0
HG00733	25	SV (DEL)	100115	39	63	HGSVC (Freeze 4)	cutesv	HiFi	szro-50-200	all	0.619048
HG00733	25	SV (DEL)	100115	39	62	HGSVC (Freeze 4)	cutesv	HiFi	szro-50-200	notr	0.629032
HG00733	25	SV (INS)	12657	9	40	HGSVC (Freeze 4)	cutesv	HiFi	szro-50-200	all	0.225
HG00733	25	SV (INS)	12657	8	36	HGSVC (Freeze 4)	cutesv	HiFi	szro-50-200	notr	0.222222
HG00733	25	SV (DEL)	55501	36	63	HGSVC (Freeze 4)	pbsv	HiFi	szro-50-200	all	0.571429
HG00733	25	SV (DEL)	55501	36	62	HGSVC (Freeze 4)	pbsv	HiFi	szro-50-200	notr	0.580645
HG00733	25	SV (INS)	14345	11	40	HGSVC (Freeze 4)	pbsv	HiFi	szro-50-200	all	0.275
HG00733	25	SV (INS)	12657	8	36	HGSVC (Freeze 4)	pbsv	HiFi	szro-50-200	notr	0.222222
HG00733	25	SV (DEL)	47783	38	63	HGSVC (Freeze 4)	sniffles	HiFi	szro-50-200	all	0.603175
HG00733	25	SV (DEL)	47783	38	62	HGSVC (Freeze 4)	sniffles	HiFi	szro-50-200	notr	0.612903
HG00733	25	SV (INS)	14345	14	40	HGSVC (Freeze 4)	sniffles	HiFi	szro-50-200	all	0.35
HG00733	25	SV (INS)	12657	10	36	HGSVC (Freeze 4)	sniffles	HiFi	szro-50-200	notr	0.277778
HG00733	25	SV (DEL)	47783	36	63	HGSVC (Freeze 4)	svim	HiFi	szro-50-200	all	0.571429
HG00733	25	SV (DEL)	47783	36	62	HGSVC (Freeze 4)	svim	HiFi	szro-50-200	notr	0.580645
HG00733	25	SV (INS)	12657	6	40	HGSVC (Freeze 4)	svim	HiFi	szro-50-200	all	0.15
HG00733	25	SV (INS)	12657	6	36	HGSVC (Freeze 4)	svim	HiFi	szro-50-200	notr	0.166667
HG00733	25	SV (DEL)	9905	0	63	HGSVC (Freeze 4)	delly	HiFi	szro-50-200	all	0
HG00733	25	SV (DEL)	9905	0	62	HGSVC (Freeze 4)	delly	HiFi	szro-50-200	notr	0
HG00733	25	SV (INS)	6160	0	40	HGSVC (Freeze 4)	delly	HiFi	szro-50-200	all	0
HG00733	25	SV (INS)	6160	0	36	HGSVC (Freeze 4)	delly	HiFi	szro-50-200	notr	0
HG00733	25	SV (DEL)	100115	35	63	HGSVC (Freeze 4)	cutesv	ONT	szro-50-200	all	0.555556
HG00733	25	SV (DEL)	100115	35	62	HGSVC (Freeze 4)	cutesv	ONT	szro-50-200	notr	0.564516
HG00733	25	SV (INS)	24292	11	40	HGSVC (Freeze 4)	cutesv	ONT	szro-50-200	all	0.275
HG00733	25	SV (INS)	24292	10	36	HGSVC (Freeze 4)	cutesv	ONT	szro-50-200	notr	0.277778
HG00733	25	SV (DEL)	47783	38	63	HGSVC (Freeze 4)	sniffles	ONT	szro-50-200	all	0.603175
HG00733	25	SV (DEL)	47783	38	62	HGSVC (Freeze 4)	sniffles	ONT	szro-50-200	notr	0.612903
HG00733	25	SV (INS)	32251	21	40	HGSVC (Freeze 4)	sniffles	ONT	szro-50-200	all	0.525
HG00733	25	SV (INS)	32251	17	36	HGSVC (Freeze 4)	sniffles	ONT	szro-50-200	notr	0.472222
HG00733	25	SV (DEL)	43365	34	63	HGSVC (Freeze 4)	svim	ONT	szro-50-200	all	0.539683
HG00733	25	SV (DEL)	43365	34	62	HGSVC (Freeze 4)	svim	ONT	szro-50-200	notr	0.548387
HG00733	25	SV (INS)	16980	9	40	HGSVC (Freeze 4)	svim	ONT	szro-50-200	all	0.225
HG00733	25	SV (INS)	16980	9	36	HGSVC (Freeze 4)	svim	ONT	szro-50-200	notr	0.25
HG00733	25	SV (DEL)	9905	0	63	HGSVC (Freeze 4)	delly	ONT	szro-50-200	all	0
HG00733	25	SV (DEL)	9905	0	62	HGSVC (Freeze 4)	delly	ONT	szro-50-200	notr	0
HG00733	25	SV (INS)	6160	0	40	HGSVC (Freeze 4)	delly	ONT	szro-50-200	all	0
HG00733	25	SV (INS)	6160	0	36	HGSVC (Freeze 4)	delly	ONT	szro-50-200	notr	0
HG00733	25	SV (DEL)	100115	40	63	HGSVC (Freeze 4)	cutesv	UL-ONT	szro-50-200	all	0.634921
HG00733	25	SV (DEL)	100115	40	62	HGSVC (Freeze 4)	cutesv	UL-ONT	szro-50-200	notr	0.645161
HG00733	25	SV (INS)	24292	21	40	HGSVC (Freeze 4)	cutesv	UL-ONT	szro-50-200	all	0.525
HG00733	25	SV (INS)	24292	16	36	HGSVC (Freeze 4)	cutesv	UL-ONT	szro-50-200	notr	0.444444
HG00733	25	SV (DEL)	47783	42	63	HGSVC (Freeze 4)	sniffles	UL-ONT	szro-50-200	all	0.666667
HG00733	25	SV (DEL)	47783	41	62	HGSVC (Freeze 4)	sniffles	UL-ONT	szro-50-200	notr	0.66129
HG00733	25	SV (INS)	32251	24	40	HGSVC (Freeze 4)	sniffles	UL-ONT	szro-50-200	all	0.6
HG00733	25	SV (INS)	32251	19	36	HGSVC (Freeze 4)	sniffles	UL-ONT	szro-50-200	notr	0.527778
HG00733	25	SV (DEL)	47783	40	63	HGSVC (Freeze 4)	svim	UL-ONT	szro-50-200	all	0.634921
HG00733	25	SV (DEL)	47783	40	62	HGSVC (Freeze 4)	svim	UL-ONT	szro-50-200	notr	0.645161
HG00733	25	SV (INS)	20949	20	40	HGSVC (Freeze 4)	svim	UL-ONT	szro-50-200	all	0.5
HG00733	25	SV (INS)	20949	16	36	HGSVC (Freeze 4)	svim	UL-ONT	szro-50-200	notr	0.444444
HG00733	25	SV (DEL)	9905	0	63	HGSVC (Freeze 4)	delly	UL-ONT	szro-50-200	all	0
HG00733	25	SV (DEL)	9905	0	62	HGSVC (Freeze 4)	delly	UL-ONT	szro-50-200	notr	0
HG00733	25	SV (INS)	6160	0	40	HGSVC (Freeze 4)	delly	UL-ONT	szro-50-200	all	0
HG00733	25	SV (INS)	6160	0	36	HGSVC (Freeze 4)	delly	UL-ONT	szro-50-200	notr	0
HG00733	30	SV (DEL)	100115	40	63	HGSVC (Freeze 4)	cutesv	HiFi	szro-50-200	all	0.634921
HG00733	30	SV (DEL)	100115	40	62	HGSVC (Freeze 4)	cutesv	HiFi	szro-50-200	notr	0.645161
HG00733	30	SV (INS)	12657	7	40	HGSVC (Freeze 4)	cutesv	HiFi	szro-50-200	all	0.175
HG00733	30	SV (INS)	12657	7	36	HGSVC (Freeze 4)	cutesv	HiFi	szro-50-200	notr	0.194444
HG00733	30	SV (DEL)	55501	37	63	HGSVC (Freeze 4)	pbsv	HiFi	szro-50-200	all	0.587302
HG00733	30	SV (DEL)	55501	37	62	HGSVC (Freeze 4)	pbsv	HiFi	szro-50-200	notr	0.596774
HG00733	30	SV (INS)	14921	13	40	HGSVC (Freeze 4)	pbsv	HiFi	szro-50-200	all	0.325
HG00733	30	SV (INS)	14921	9	36	HGSVC (Freeze 4)	pbsv	HiFi	szro-50-200	notr	0.25
HG00733	30	SV (DEL)	47783	37	63	HGSVC (Freeze 4)	sniffles	HiFi	szro-50-200	all	0.587302
HG00733	30	SV (DEL)	47783	37	62	HGSVC (Freeze 4)	sniffles	HiFi	szro-50-200	notr	0.596774
HG00733	30	SV (INS)	14921	13	40	HGSVC (Freeze 4)	sniffles	HiFi	szro-50-200	all	0.325
HG00733	30	SV (INS)	14921	11	36	HGSVC (Freeze 4)	sniffles	HiFi	szro-50-200	notr	0.305556
HG00733	30	SV (DEL)	47783	37	63	HGSVC (Freeze 4)	svim	HiFi	szro-50-200	all	0.587302
HG00733	30	SV (DEL)	47783	37	62	HGSVC (Freeze 4)	svim	HiFi	szro-50-200	notr	0.596774
HG00733	30	SV (INS)	12657	6	40	HGSVC (Freeze 4)	svim	HiFi	szro-50-200	all	0.15
HG00733	30	SV (INS)	12657	6	36	HGSVC (Freeze 4)	svim	HiFi	szro-50-200	notr	0.166667
HG00733	30	SV (DEL)	9905	0	63	HGSVC (Freeze 4)	delly	HiFi	szro-50-200	all	0
HG00733	30	SV (DEL)	9905	0	62	HGSVC (Freeze 4)	delly	HiFi	szro-50-200	notr	0
HG00733	30	SV (INS)	8323	0	40	HGSVC (Freeze 4)	delly	HiFi	szro-50-200	all	0
HG00733	30	SV (INS)	8323	0	36	HGSVC (Freeze 4)	delly	HiFi	szro-50-200	notr	0
HG00733	30	SV (DEL)	100115	38	63	HGSVC (Freeze 4)	cutesv	ONT	szro-50-200	all	0.603175
HG00733	30	SV (DEL)	100115	38	62	HGSVC (Freeze 4)	cutesv	ONT	szro-50-200	notr	0.612903
HG00733	30	SV (INS)	24292	12	40	HGSVC (Freeze 4)	cutesv	ONT	szro-50-200	all	0.3
HG00733	30	SV (INS)	24292	10	36	HGSVC (Freeze 4)	cutesv	ONT	szro-50-200	notr	0.277778
HG00733	30	SV (DEL)	47783	39	63	HGSVC (Freeze 4)	sniffles	ONT	szro-50-200	all	0.619048
HG00733	30	SV (DEL)	47783	39	62	HGSVC (Freeze 4)	sniffles	ONT	szro-50-200	notr	0.629032
HG00733	30	SV (INS)	32251	23	40	HGSVC (Freeze 4)	sniffles	ONT	szro-50-200	all	0.575
HG00733	30	SV (INS)	32251	18	36	HGSVC (Freeze 4)	sniffles	ONT	szro-50-200	notr	0.5
HG00733	30	SV (DEL)	47783	35	63	HGSVC (Freeze 4)	svim	ONT	szro-50-200	all	0.555556
HG00733	30	SV (DEL)	47783	35	62	HGSVC (Freeze 4)	svim	ONT	szro-50-200	notr	0.564516
HG00733	30	SV (INS)	15193	10	40	HGSVC (Freeze 4)	svim	ONT	szro-50-200	all	0.25
HG00733	30	SV (INS)	15193	10	36	HGSVC (Freeze 4)	svim	ONT	szro-50-200	notr	0.277778
HG00733	30	SV (DEL)	9905	0	63	HGSVC (Freeze 4)	delly	ONT	szro-50-200	all	0
HG00733	30	SV (DEL)	9905	0	62	HGSVC (Freeze 4)	delly	ONT	szro-50-200	notr	0
HG00733	30	SV (INS)	6160	0	40	HGSVC (Freeze 4)	delly	ONT	szro-50-200	all	0
HG00733	30	SV (INS)	6160	0	36	HGSVC (Freeze 4)	delly	ONT	szro-50-200	notr	0
HG00733	30	SV (DEL)	100115	41	63	HGSVC (Freeze 4)	cutesv	UL-ONT	szro-50-200	all	0.650794
HG00733	30	SV (DEL)	100115	41	62	HGSVC (Freeze 4)	cutesv	UL-ONT	szro-50-200	notr	0.66129
HG00733	30	SV (INS)	24292	21	40	HGSVC (Freeze 4)	cutesv	UL-ONT	szro-50-200	all	0.525
HG00733	30	SV (INS)	24292	16	36	HGSVC (Freeze 4)	cutesv	UL-ONT	szro-50-200	notr	0.444444
HG00733	30	SV (DEL)	238803	42	63	HGSVC (Freeze 4)	sniffles	UL-ONT	szro-50-200	all	0.666667
HG00733	30	SV (DEL)	238803	42	62	HGSVC (Freeze 4)	sniffles	UL-ONT	szro-50-200	notr	0.677419
HG00733	30	SV (INS)	32251	24	40	HGSVC (Freeze 4)	sniffles	UL-ONT	szro-50-200	all	0.6
HG00733	30	SV (INS)	32251	19	36	HGSVC (Freeze 4)	sniffles	UL-ONT	szro-50-200	notr	0.527778
HG00733	30	SV (DEL)	47783	40	63	HGSVC (Freeze 4)	svim	UL-ONT	szro-50-200	all	0.634921
HG00733	30	SV (DEL)	47783	40	62	HGSVC (Freeze 4)	svim	UL-ONT	szro-50-200	notr	0.645161
HG00733	30	SV (INS)	20949	20	40	HGSVC (Freeze 4)	svim	UL-ONT	szro-50-200	all	0.5
HG00733	30	SV (INS)	20949	16	36	HGSVC (Freeze 4)	svim	UL-ONT	szro-50-200	notr	0.444444
HG00733	30	SV (DEL)	9905	0	63	HGSVC (Freeze 4)	delly	UL-ONT	szro-50-200	all	0
HG00733	30	SV (DEL)	9905	0	62	HGSVC (Freeze 4)	delly	UL-ONT	szro-50-200	notr	0
HG00733	30	SV (INS)	6160	0	40	HGSVC (Freeze 4)	delly	UL-ONT	szro-50-200	all	0
HG00733	30	SV (INS)	6160	0	36	HGSVC (Freeze 4)	delly	UL-ONT	szro-50-200	notr	0
HG002	5	SV (DEL)	45516	28	69	HGSVC (Freeze 4)	cutesv	HiFi	szro-50-200	all	0.405797
HG002	5	SV (DEL)	45516	27	68	HGSVC (Freeze 4)	cutesv	HiFi	szro-50-200	notr	0.397059
HG002	5	SV (INS)	12142	3	41	HGSVC (Freeze 4)	cutesv	HiFi	szro-50-200	all	0.0731707
HG002	5	SV (INS)	12142	3	39	HGSVC (Freeze 4)	cutesv	HiFi	szro-50-200	notr	0.0769231
HG002	5	SV (DEL)	32198	16	69	HGSVC (Freeze 4)	pbsv	HiFi	szro-50-200	all	0.231884
HG002	5	SV (DEL)	32198	15	68	HGSVC (Freeze 4)	pbsv	HiFi	szro-50-200	notr	0.220588
HG002	5	SV (INS)	10158	1	41	HGSVC (Freeze 4)	pbsv	HiFi	szro-50-200	all	0.0243902
HG002	5	SV (INS)	10158	1	39	HGSVC (Freeze 4)	pbsv	HiFi	szro-50-200	notr	0.025641
HG002	5	SV (DEL)	114201	26	69	HGSVC (Freeze 4)	sniffles	HiFi	szro-50-200	all	0.376812
HG002	5	SV (DEL)	114201	26	68	HGSVC (Freeze 4)	sniffles	HiFi	szro-50-200	notr	0.382353
HG002	5	SV (INS)	12657	5	41	HGSVC (Freeze 4)	sniffles	HiFi	szro-50-200	all	0.121951
HG002	5	SV (INS)	12657	4	39	HGSVC (Freeze 4)	sniffles	HiFi	szro-50-200	notr	0.102564
HG002	5	SV (DEL)	32198	12	69	HGSVC (Freeze 4)	svim	HiFi	szro-50-200	all	0.173913
HG002	5	SV (DEL)	32198	12	68	HGSVC (Freeze 4)	svim	HiFi	szro-50-200	notr	0.176471
HG002	5	SV (INS)	8212	0	41	HGSVC (Freeze 4)	svim	HiFi	szro-50-200	all	0
HG002	5	SV (INS)	8212	0	39	HGSVC (Freeze 4)	svim	HiFi	szro-50-200	notr	0
HG002	5	SV (DEL)	9454	0	69	HGSVC (Freeze 4)	delly	HiFi	szro-50-200	all	0
HG002	5	SV (DEL)	9454	0	68	HGSVC (Freeze 4)	delly	HiFi	szro-50-200	notr	0
HG002	5	SV (INS)	6122	0	41	HGSVC (Freeze 4)	delly	HiFi	szro-50-200	all	0
HG002	5	SV (INS)	6122	0	39	HGSVC (Freeze 4)	delly	HiFi	szro-50-200	notr	0
HG002	5	SV (DEL)	45516	25	69	HGSVC (Freeze 4)	cutesv	ONT	szro-50-200	all	0.362319
HG002	5	SV (DEL)	45516	25	68	HGSVC (Freeze 4)	cutesv	ONT	szro-50-200	notr	0.367647
HG002	5	SV (INS)	12657	7	41	HGSVC (Freeze 4)	cutesv	ONT	szro-50-200	all	0.170732
HG002	5	SV (INS)	12657	7	39	HGSVC (Freeze 4)	cutesv	ONT	szro-50-200	notr	0.179487
HG002	5	SV (DEL)	45516	21	69	HGSVC (Freeze 4)	sniffles	ONT	szro-50-200	all	0.304348
HG002	5	SV (DEL)	45516	21	68	HGSVC (Freeze 4)	sniffles	ONT	szro-50-200	notr	0.308824
HG002	5	SV (INS)	16980	12	41	HGSVC (Freeze 4)	sniffles	ONT	szro-50-200	all	0.292683
HG002	5	SV (INS)	16980	10	39	HGSVC (Freeze 4)	sniffles	ONT	szro-50-200	notr	0.25641
HG002	5	SV (DEL)	45516	11	69	HGSVC (Freeze 4)	svim	ONT	szro-50-200	all	0.15942
HG002	5	SV (DEL)	45516	11	68	HGSVC (Freeze 4)	svim	ONT	szro-50-200	notr	0.161765
HG002	5	SV (INS)	12657	3	41	HGSVC (Freeze 4)	svim	ONT	szro-50-200	all	0.0731707
HG002	5	SV (INS)	12657	3	39	HGSVC (Freeze 4)	svim	ONT	szro-50-200	notr	0.0769231
HG002	5	SV (DEL)	9604	0	69	HGSVC (Freeze 4)	delly	ONT	szro-50-200	all	0
HG002	5	SV (DEL)	9604	0	68	HGSVC (Freeze 4)	delly	ONT	szro-50-200	notr	0
HG002	5	SV (INS)	7911	0	41	HGSVC (Freeze 4)	delly	ONT	szro-50-200	all	0
HG002	5	SV (INS)	6122	0	39	HGSVC (Freeze 4)	delly	ONT	szro-50-200	notr	0
HG002	5	SV (DEL)	84683	32	69	HGSVC (Freeze 4)	cutesv	UL-ONT	szro-50-200	all	0.463768
HG002	5	SV (DEL)	84683	32	68	HGSVC (Freeze 4)	cutesv	UL-ONT	szro-50-200	notr	0.470588
HG002	5	SV (INS)	24292	16	41	HGSVC (Freeze 4)	cutesv	UL-ONT	szro-50-200	all	0.390244
HG002	5	SV (INS)	24292	15	39	HGSVC (Freeze 4)	cutesv	UL-ONT	szro-50-200	notr	0.384615
HG002	5	SV (DEL)	45516	28	69	HGSVC (Freeze 4)	sniffles	UL-ONT	szro-50-200	all	0.405797
HG002	5	SV (DEL)	45516	28	68	HGSVC (Freeze 4)	sniffles	UL-ONT	szro-50-200	notr	0.411765
HG002	5	SV (INS)	20380	20	41	HGSVC (Freeze 4)	sniffles	UL-ONT	szro-50-200	all	0.487805
HG002	5	SV (INS)	20380	17	39	HGSVC (Freeze 4)	sniffles	UL-ONT	szro-50-200	notr	0.435897
HG002	5	SV (DEL)	45516	21	69	HGSVC (Freeze 4)	svim	UL-ONT	szro-50-200	all	0.304348
HG002	5	SV (DEL)	45516	21	68	HGSVC (Freeze 4)	svim	UL-ONT	szro-50-200	notr	0.308824
HG002	5	SV (INS)	20949	14	41	HGSVC (Freeze 4)	svim	UL-ONT	szro-50-200	all	0.341463
HG002	5	SV (INS)	20949	13	39	HGSVC (Freeze 4)	svim	UL-ONT	szro-50-200	notr	0.333333
HG002	5	SV (DEL)	9636	0	69	HGSVC (Freeze 4)	delly	UL-ONT	szro-50-200	all	0
HG002	5	SV (DEL)	9636	0	68	HGSVC (Freeze 4)	delly	UL-ONT	szro-50-200	notr	0
HG002	5	SV (INS)	6091	0	41	HGSVC (Freeze 4)	delly	UL-ONT	szro-50-200	all	0
HG002	5	SV (INS)	6091	0	39	HGSVC (Freeze 4)	delly	UL-ONT	szro-50-200	notr	0
HG002	8	SV (DEL)	45516	31	69	HGSVC (Freeze 4)	cutesv	HiFi	szro-50-200	all	0.449275
HG002	8	SV (DEL)	45516	31	68	HGSVC (Freeze 4)	cutesv	HiFi	szro-50-200	notr	0.455882
HG002	8	SV (INS)	12142	4	41	HGSVC (Freeze 4)	cutesv	HiFi	szro-50-200	all	0.097561
HG002	8	SV (INS)	12142	4	39	HGSVC (Freeze 4)	cutesv	HiFi	szro-50-200	notr	0.102564
HG002	8	SV (DEL)	45516	32	69	HGSVC (Freeze 4)	pbsv	HiFi	szro-50-200	all	0.463768
HG002	8	SV (DEL)	45516	31	68	HGSVC (Freeze 4)	pbsv	HiFi	szro-50-200	notr	0.455882
HG002	8	SV (INS)	12142	5	41	HGSVC (Freeze 4)	pbsv	HiFi	szro-50-200	all	0.121951
HG002	8	SV (INS)	12142	5	39	HGSVC (Freeze 4)	pbsv	HiFi	szro-50-200	notr	0.128205
HG002	8	SV (DEL)	114201	33	69	HGSVC (Freeze 4)	sniffles	HiFi	szro-50-200	all	0.478261
HG002	8	SV (DEL)	114201	33	68	HGSVC (Freeze 4)	sniffles	HiFi	szro-50-200	notr	0.485294
HG002	8	SV (INS)	20153	11	41	HGSVC (Freeze 4)	sniffles	HiFi	szro-50-200	all	0.268293
HG002	8	SV (INS)	20153	9	39	HGSVC (Freeze 4)	sniffles	HiFi	szro-50-200	notr	0.230769
HG002	8	SV (DEL)	45516	25	69	HGSVC (Freeze 4)	svim	HiFi	szro-50-200	all	0.362319
HG002	8	SV (DEL)	45516	25	68	HGSVC (Freeze 4)	svim	HiFi	szro-50-200	notr	0.367647
HG002	8	SV (INS)	8844	0	41	HGSVC (Freeze 4)	svim	HiFi	szro-50-200	all	0
HG002	8	SV (INS)	8428	0	39	HGSVC (Freeze 4)	svim	HiFi	szro-50-200	notr	0
HG002	8	SV (DEL)	9604	0	69	HGSVC (Freeze 4)	delly	HiFi	szro-50-200	all	0
HG002	8	SV (DEL)	9604	0	68	HGSVC (Freeze 4)	delly	HiFi	szro-50-200	notr	0
HG002	8	SV (INS)	6375	0	41	HGSVC (Freeze 4)	delly	HiFi	szro-50-200	all	0
HG002	8	SV (INS)	6122	0	39	HGSVC (Freeze 4)	delly	HiFi	szro-50-200	notr	0
HG002	8	SV (DEL)	55668	30	69	HGSVC (Freeze 4)	cutesv	ONT	szro-50-200	all	0.434783
HG002	8	SV (DEL)	55668	30	68	HGSVC (Freeze 4)	cutesv	ONT	szro-50-200	notr	0.441176
HG002	8	SV (INS)	11067	6	41	HGSVC (Freeze 4)	cutesv	ONT	szro-50-200	all	0.146341
HG002	8	SV (INS)	11067	5	39	HGSVC (Freeze 4)	cutesv	ONT	szro-50-200	notr	0.128205
HG002	8	SV (DEL)	114201	35	69	HGSVC (Freeze 4)	sniffles	ONT	szro-50-200	all	0.507246
HG002	8	SV (DEL)	114201	35	68	HGSVC (Freeze 4)	sniffles	ONT	szro-50-200	notr	0.514706
HG002	8	SV (INS)	16639	16	41	HGSVC (Freeze 4)	sniffles	ONT	szro-50-200	all	0.390244
HG002	8	SV (INS)	16639	13	39	HGSVC (Freeze 4)	sniffles	ONT	szro-50-200	notr	0.333333
HG002	8	SV (DEL)	45516	25	69	HGSVC (Freeze 4)	svim	ONT	szro-50-200	all	0.362319
HG002	8	SV (DEL)	45516	25	68	HGSVC (Freeze 4)	svim	ONT	szro-50-200	notr	0.367647
HG002	8	SV (INS)	12887	6	41	HGSVC (Freeze 4)	svim	ONT	szro-50-200	all	0.146341
HG002	8	SV (INS)	12887	5	39	HGSVC (Freeze 4)	svim	ONT	szro-50-200	notr	0.128205
HG002	8	SV (DEL)	9636	0	69	HGSVC (Freeze 4)	delly	ONT	szro-50-200	all	0
HG002	8	SV (DEL)	9636	0	68	HGSVC (Freeze 4)	delly	ONT	szro-50-200	notr	0
HG002	8	SV (INS)	6144	0	41	HGSVC (Freeze 4)	delly	ONT	szro-50-200	all	0
HG002	8	SV (INS)	6144	0	39	HGSVC (Freeze 4)	delly	ONT	szro-50-200	notr	0
HG002	8	SV (DEL)	55668	31	69	HGSVC (Freeze 4)	cutesv	UL-ONT	szro-50-200	all	0.449275
HG002	8	SV (DEL)	55668	31	68	HGSVC (Freeze 4)	cutesv	UL-ONT	szro-50-200	notr	0.455882
HG002	8	SV (INS)	24292	16	41	HGSVC (Freeze 4)	cutesv	UL-ONT	szro-50-200	all	0.390244
HG002	8	SV (INS)	24292	14	39	HGSVC (Freeze 4)	cutesv	UL-ONT	szro-50-200	notr	0.358974
HG002	8	SV (DEL)	45516	35	69	HGSVC (Freeze 4)	sniffles	UL-ONT	szro-50-200	all	0.507246
HG002	8	SV (DEL)	45516	34	68	HGSVC (Freeze 4)	sniffles	UL-ONT	szro-50-200	notr	0.5
HG002	8	SV (INS)	27910	19	41	HGSVC (Freeze 4)	sniffles	UL-ONT	szro-50-200	all	0.463415
HG002	8	SV (INS)	27910	17	39	HGSVC (Freeze 4)	sniffles	UL-ONT	szro-50-200	notr	0.435897
HG002	8	SV (DEL)	45516	28	69	HGSVC (Freeze 4)	svim	UL-ONT	szro-50-200	all	0.405797
HG002	8	SV (DEL)	45516	28	68	HGSVC (Freeze 4)	svim	UL-ONT	szro-50-200	notr	0.411765
HG002	8	SV (INS)	16639	14	41	HGSVC (Freeze 4)	svim	UL-ONT	szro-50-200	all	0.341463
HG002	8	SV (INS)	16639	12	39	HGSVC (Freeze 4)	svim	UL-ONT	szro-50-200	notr	0.307692
HG002	8	SV (DEL)	9636	0	69	HGSVC (Freeze 4)	delly	UL-ONT	szro-50-200	all	0
HG002	8	SV (DEL)	9636	0	68	HGSVC (Freeze 4)	delly	UL-ONT	szro-50-200	notr	0
HG002	8	SV (INS)	6204	0	41	HGSVC (Freeze 4)	delly	UL-ONT	szro-50-200	all	0
HG002	8	SV (INS)	6160	0	39	HGSVC (Freeze 4)	delly	UL-ONT	szro-50-200	notr	0
HG002	10	SV (DEL)	45516	34	69	HGSVC (Freeze 4)	cutesv	HiFi	szro-50-200	all	0.492754
HG002	10	SV (DEL)	45516	33	68	HGSVC (Freeze 4)	cutesv	HiFi	szro-50-200	notr	0.485294
HG002	10	SV (INS)	10490	3	41	HGSVC (Freeze 4)	cutesv	HiFi	szro-50-200	all	0.0731707
HG002	10	SV (INS)	10490	3	39	HGSVC (Freeze 4)	cutesv	HiFi	szro-50-200	notr	0.0769231
HG002	10	SV (DEL)	45516	35	69	HGSVC (Freeze 4)	pbsv	HiFi	szro-50-200	all	0.507246
HG002	10	SV (DEL)	45516	34	68	HGSVC (Freeze 4)	pbsv	HiFi	szro-50-200	notr	0.5
HG002	10	SV (INS)	12657	5	41	HGSVC (Freeze 4)	pbsv	HiFi	szro-50-200	all	0.121951
HG002	10	SV (INS)	12657	5	39	HGSVC (Freeze 4)	pbsv	HiFi	szro-50-200	notr	0.128205
HG002	10	SV (DEL)	114201	36	69	HGSVC (Freeze 4)	sniffles	HiFi	szro-50-200	all	0.521739
HG002	10	SV (DEL)	114201	36	68	HGSVC (Freeze 4)	sniffles	HiFi	szro-50-200	notr	0.529412
HG002	10	SV (INS)	14921	9	41	HGSVC (Freeze 4)	sniffles	HiFi	szro-50-200	all	0.219512
HG002	10	SV (INS)	14921	8	39	HGSVC (Freeze 4)	sniffles	HiFi	szro-50-200	notr	0.205128
HG002	10	SV (DEL)	45516	29	69	HGSVC (Freeze 4)	svim	HiFi	szro-50-200	all	0.42029
HG002	10	SV (DEL)	45516	29	68	HGSVC (Freeze 4)	svim	HiFi	szro-50-200	notr	0.426471
HG002	10	SV (INS)	8844	0	41	HGSVC (Freeze 4)	svim	HiFi	szro-50-200	all	0
HG002	10	SV (INS)	8632	0	39	HGSVC (Freeze 4)	svim	HiFi	szro-50-200	notr	0
HG002	10	SV (DEL)	9636	0	69	HGSVC (Freeze 4)	delly	HiFi	szro-50-200	all	0
HG002	10	SV (DEL)	9636	0	68	HGSVC (Freeze 4)	delly	HiFi	szro-50-200	notr	0
HG002	10	SV (INS)	7911	0	41	HGSVC (Freeze 4)	delly	HiFi	szro-50-200	all	0
HG002	10	SV (INS)	6122	0	39	HGSVC (Freeze 4)	delly	HiFi	szro-50-200	notr	0
HG002	10	SV (DEL)	55668	33	69	HGSVC (Freeze 4)	cutesv	ONT	szro-50-200	all	0.478261
HG002	10	SV (DEL)	55668	33	68	HGSVC (Freeze 4)	cutesv	ONT	szro-50-200	notr	0.485294
HG002	10	SV (INS)	20153	11	41	HGSVC (Freeze 4)	cutesv	ONT	szro-50-200	all	0.268293
HG002	10	SV (INS)	20153	10	39	HGSVC (Freeze 4)	cutesv	ONT	szro-50-200	notr	0.25641
HG002	10	SV (DEL)	114201	36	69	HGSVC (Freeze 4)	sniffles	ONT	szro-50-200	all	0.521739
HG002	10	SV (DEL)	114201	35	68	HGSVC (Freeze 4)	sniffles	ONT	szro-50-200	notr	0.514706
HG002	10	SV (INS)	16980	17	41	HGSVC (Freeze 4)	sniffles	ONT	szro-50-200	all	0.414634
HG002	10	SV (INS)	16980	14	39	HGSVC (Freeze 4)	sniffles	ONT	szro-50-200	notr	0.358974
HG002	10	SV (DEL)	45516	31	69	HGSVC (Freeze 4)	svim	ONT	szro-50-200	all	0.449275
HG002	10	SV (DEL)	45516	31	68	HGSVC (Freeze 4)	svim	ONT	szro-50-200	notr	0.455882
HG002	10	SV (INS)	20153	10	41	HGSVC (Freeze 4)	svim	ONT	szro-50-200	all	0.243902
HG002	10	SV (INS)	20153	9	39	HGSVC (Freeze 4)	svim	ONT	szro-50-200	notr	0.230769
HG002	10	SV (DEL)	9636	0	69	HGSVC (Freeze 4)	delly	ONT	szro-50-200	all	0
HG002	10	SV (DEL)	9636	0	68	HGSVC (Freeze 4)	delly	ONT	szro-50-200	notr	0
HG002	10	SV (INS)	6122	0	41	HGSVC (Freeze 4)	delly	ONT	szro-50-200	all	0
HG002	10	SV (INS)	6122	0	39	HGSVC (Freeze 4)	delly	ONT	szro-50-200	notr	0
HG002	10	SV (DEL)	55668	39	69	HGSVC (Freeze 4)	cutesv	UL-ONT	szro-50-200	all	0.565217
HG002	10	SV (DEL)	55668	39	68	HGSVC (Freeze 4)	cutesv	UL-ONT	szro-50-200	notr	0.573529
HG002	10	SV (INS)	24292	18	41	HGSVC (Freeze 4)	cutesv	UL-ONT	szro-50-200	all	0.439024
HG002	10	SV (INS)	24292	16	39	HGSVC (Freeze 4)	cutesv	UL-ONT	szro-50-200	notr	0.410256
HG002	10	SV (DEL)	45516	39	69	HGSVC (Freeze 4)	sniffles	UL-ONT	szro-50-200	all	0.565217
HG002	10	SV (DEL)	45516	39	68	HGSVC (Freeze 4)	sniffles	UL-ONT	szro-50-200	notr	0.573529
HG002	10	SV (INS)	27910	22	41	HGSVC (Freeze 4)	sniffles	UL-ONT	szro-50-200	all	0.536585
HG002	10	SV (INS)	27910	19	39	HGSVC (Freeze 4)	sniffles	UL-ONT	szro-50-200	notr	0.487179
HG002	10	SV (DEL)	45516	34	69	HGSVC (Freeze 4)	svim	UL-ONT	szro-50-200	all	0.492754
HG002	10	SV (DEL)	45516	34	68	HGSVC (Freeze 4)	svim	UL-ONT	szro-50-200	notr	0.5
HG002	10	SV (INS)	20380	17	41	HGSVC (Freeze 4)	svim	UL-ONT	szro-50-200	all	0.414634
HG002	10	SV (INS)	20380	15	39	HGSVC (Freeze 4)	svim	UL-ONT	szro-50-200	notr	0.384615
HG002	10	SV (DEL)	9636	0	69	HGSVC (Freeze 4)	delly	UL-ONT	szro-50-200	all	0
HG002	10	SV (DEL)	9636	0	68	HGSVC (Freeze 4)	delly	UL-ONT	szro-50-200	notr	0
HG002	10	SV (INS)	6204	0	41	HGSVC (Freeze 4)	delly	UL-ONT	szro-50-200	all	0
HG002	10	SV (INS)	6160	0	39	HGSVC (Freeze 4)	delly	UL-ONT	szro-50-200	notr	0
HG002	12	SV (DEL)	45516	32	69	HGSVC (Freeze 4)	cutesv	HiFi	szro-50-200	all	0.463768
HG002	12	SV (DEL)	45516	31	68	HGSVC (Freeze 4)	cutesv	HiFi	szro-50-200	notr	0.455882
HG002	12	SV (INS)	10158	1	41	HGSVC (Freeze 4)	cutesv	HiFi	szro-50-200	all	0.0243902
HG002	12	SV (INS)	10158	1	39	HGSVC (Freeze 4)	cutesv	HiFi	szro-50-200	notr	0.025641
HG002	12	SV (DEL)	55668	36	69	HGSVC (Freeze 4)	pbsv	HiFi	szro-50-200	all	0.521739
HG002	12	SV (DEL)	55668	36	68	HGSVC (Freeze 4)	pbsv	HiFi	szro-50-200	notr	0.529412
HG002	12	SV (INS)	11129	3	41	HGSVC (Freeze 4)	pbsv	HiFi	szro-50-200	all	0.0731707
HG002	12	SV (INS)	11129	3	39	HGSVC (Freeze 4)	pbsv	HiFi	szro-50-200	notr	0.0769231
HG002	12	SV (DEL)	114201	32	69	HGSVC (Freeze 4)	sniffles	HiFi	szro-50-200	all	0.463768
HG002	12	SV (DEL)	114201	32	68	HGSVC (Freeze 4)	sniffles	HiFi	szro-50-200	notr	0.470588
HG002	12	SV (INS)	12657	8	41	HGSVC (Freeze 4)	sniffles	HiFi	szro-50-200	all	0.195122
HG002	12	SV (INS)	12657	7	39	HGSVC (Freeze 4)	sniffles	HiFi	szro-50-200	notr	0.179487
HG002	12	SV (DEL)	45516	24	69	HGSVC (Freeze 4)	svim	HiFi	szro-50-200	all	0.347826
HG002	12	SV (DEL)	45516	24	68	HGSVC (Freeze 4)	svim	HiFi	szro-50-200	notr	0.352941
HG002	12	SV (INS)	8844	0	41	HGSVC (Freeze 4)	svim	HiFi	szro-50-200	all	0
HG002	12	SV (INS)	8632	0	39	HGSVC (Freeze 4)	svim	HiFi	szro-50-200	notr	0
HG002	12	SV (DEL)	9636	0	69	HGSVC (Freeze 4)	delly	HiFi	szro-50-200	all	0
HG002	12	SV (DEL)	9636	0	68	HGSVC (Freeze 4)	delly	HiFi	szro-50-200	notr	0
HG002	12	SV (INS)	7911	0	41	HGSVC (Freeze 4)	delly	HiFi	szro-50-200	all	0
HG002	12	SV (INS)	6160	0	39	HGSVC (Freeze 4)	delly	HiFi	szro-50-200	notr	0
HG002	12	SV (DEL)	43365	29	69	HGSVC (Freeze 4)	cutesv	ONT	szro-50-200	all	0.42029
HG002	12	SV (DEL)	43365	29	68	HGSVC (Freeze 4)	cutesv	ONT	szro-50-200	notr	0.426471
HG002	12	SV (INS)	12597	9	41	HGSVC (Freeze 4)	cutesv	ONT	szro-50-200	all	0.219512
HG002	12	SV (INS)	12597	8	39	HGSVC (Freeze 4)	cutesv	ONT	szro-50-200	notr	0.205128
HG002	12	SV (DEL)	114201	33	69	HGSVC (Freeze 4)	sniffles	ONT	szro-50-200	all	0.478261
HG002	12	SV (DEL)	114201	33	68	HGSVC (Freeze 4)	sniffles	ONT	szro-50-200	notr	0.485294
HG002	12	SV (INS)	16980	18	41	HGSVC (Freeze 4)	sniffles	ONT	szro-50-200	all	0.439024
HG002	12	SV (INS)	16980	15	39	HGSVC (Freeze 4)	sniffles	ONT	szro-50-200	notr	0.384615
HG002	12	SV (DEL)	43365	25	69	HGSVC (Freeze 4)	svim	ONT	szro-50-200	all	0.362319
HG002	12	SV (DEL)	43365	25	68	HGSVC (Freeze 4)	svim	ONT	szro-50-200	notr	0.367647
HG002	12	SV (INS)	12597	8	41	HGSVC (Freeze 4)	svim	ONT	szro-50-200	all	0.195122
HG002	12	SV (INS)	12597	7	39	HGSVC (Freeze 4)	svim	ONT	szro-50-200	notr	0.179487
HG002	12	SV (DEL)	9636	0	69	HGSVC (Freeze 4)	delly	ONT	szro-50-200	all	0
HG002	12	SV (DEL)	9636	0	68	HGSVC (Freeze 4)	delly	ONT	szro-50-200	notr	0
HG002	12	SV (INS)	7911	0	41	HGSVC (Freeze 4)	delly	ONT	szro-50-200	all	0
HG002	12	SV (INS)	6144	0	39	HGSVC (Freeze 4)	delly	ONT	szro-50-200	notr	0
HG002	12	SV (DEL)	55668	37	69	HGSVC (Freeze 4)	cutesv	UL-ONT	szro-50-200	all	0.536232
HG002	12	SV (DEL)	55668	37	68	HGSVC (Freeze 4)	cutesv	UL-ONT	szro-50-200	notr	0.544118
HG002	12	SV (INS)	24292	18	41	HGSVC (Freeze 4)	cutesv	UL-ONT	szro-50-200	all	0.439024
HG002	12	SV (INS)	24292	16	39	HGSVC (Freeze 4)	cutesv	UL-ONT	szro-50-200	notr	0.410256
HG002	12	SV (DEL)	45516	37	69	HGSVC (Freeze 4)	sniffles	UL-ONT	szro-50-200	all	0.536232
HG002	12	SV (DEL)	45516	37	68	HGSVC (Freeze 4)	sniffles	UL-ONT	szro-50-200	notr	0.544118
HG002	12	SV (INS)	27910	23	41	HGSVC (Freeze 4)	sniffles	UL-ONT	szro-50-200	all	0.560976
HG002	12	SV (INS)	27910	20	39	HGSVC (Freeze 4)	sniffles	UL-ONT	szro-50-200	notr	0.512821
HG002	12	SV (DEL)	45516	31	69	HGSVC (Freeze 4)	svim	UL-ONT	szro-50-200	all	0.449275
HG002	12	SV (DEL)	45516	31	68	HGSVC (Freeze 4)	svim	UL-ONT	szro-50-200	notr	0.455882
HG002	12	SV (INS)	20949	18	41	HGSVC (Freeze 4)	svim	UL-ONT	szro-50-200	all	0.439024
HG002	12	SV (INS)	20949	16	39	HGSVC (Freeze 4)	svim	UL-ONT	szro-50-200	notr	0.410256
HG002	12	SV (DEL)	9636	0	69	HGSVC (Freeze 4)	delly	UL-ONT	szro-50-200	all	0
HG002	12	SV (DEL)	9636	0	68	HGSVC (Freeze 4)	delly	UL-ONT	szro-50-200	notr	0
HG002	12	SV (INS)	6204	0	41	HGSVC (Freeze 4)	delly	UL-ONT	szro-50-200	all	0
HG002	12	SV (INS)	6122	0	39	HGSVC (Freeze 4)	delly	UL-ONT	szro-50-200	notr	0
HG002	15	SV (DEL)	45516	38	69	HGSVC (Freeze 4)	cutesv	HiFi	szro-50-200	all	0.550725
HG002	15	SV (DEL)	45516	37	68	HGSVC (Freeze 4)	cutesv	HiFi	szro-50-200	notr	0.544118
HG002	15	SV (INS)	11129	4	41	HGSVC (Freeze 4)	cutesv	HiFi	szro-50-200	all	0.097561
HG002	15	SV (INS)	11129	3	39	HGSVC (Freeze 4)	cutesv	HiFi	szro-50-200	notr	0.0769231
HG002	15	SV (DEL)	55668	39	69	HGSVC (Freeze 4)	pbsv	HiFi	szro-50-200	all	0.565217
HG002	15	SV (DEL)	55668	38	68	HGSVC (Freeze 4)	pbsv	HiFi	szro-50-200	notr	0.558824
HG002	15	SV (INS)	12597	6	41	HGSVC (Freeze 4)	pbsv	HiFi	szro-50-200	all	0.146341
HG002	15	SV (INS)	12597	5	39	HGSVC (Freeze 4)	pbsv	HiFi	szro-50-200	notr	0.128205
HG002	15	SV (DEL)	45516	34	69	HGSVC (Freeze 4)	sniffles	HiFi	szro-50-200	all	0.492754
HG002	15	SV (DEL)	45516	34	68	HGSVC (Freeze 4)	sniffles	HiFi	szro-50-200	notr	0.5
HG002	15	SV (INS)	20153	11	41	HGSVC (Freeze 4)	sniffles	HiFi	szro-50-200	all	0.268293
HG002	15	SV (INS)	20153	10	39	HGSVC (Freeze 4)	sniffles	HiFi	szro-50-200	notr	0.25641
HG002	15	SV (DEL)	45516	30	69	HGSVC (Freeze 4)	svim	HiFi	szro-50-200	all	0.434783
HG002	15	SV (DEL)	45516	30	68	HGSVC (Freeze 4)	svim	HiFi	szro-50-200	notr	0.441176
HG002	15	SV (INS)	11129	2	41	HGSVC (Freeze 4)	svim	HiFi	szro-50-200	all	0.0487805
HG002	15	SV (INS)	11129	2	39	HGSVC (Freeze 4)	svim	HiFi	szro-50-200	notr	0.0512821
HG002	15	SV (DEL)	9661	0	69	HGSVC (Freeze 4)	delly	HiFi	szro-50-200	all	0
HG002	15	SV (DEL)	9661	0	68	HGSVC (Freeze 4)	delly	HiFi	szro-50-200	notr	0
HG002	15	SV (INS)	7911	0	41	HGSVC (Freeze 4)	delly	HiFi	szro-50-200	all	0
HG002	15	SV (INS)	6160	0	39	HGSVC (Freeze 4)	delly	HiFi	szro-50-200	notr	0
HG002	15	SV (DEL)	55668	32	69	HGSVC (Freeze 4)	cutesv	ONT	szro-50-200	all	0.463768
HG002	15	SV (DEL)	55668	32	68	HGSVC (Freeze 4)	cutesv	ONT	szro-50-200	notr	0.470588
HG002	15	SV (INS)	12657	10	41	HGSVC (Freeze 4)	cutesv	ONT	szro-50-200	all	0.243902
HG002	15	SV (INS)	12657	9	39	HGSVC (Freeze 4)	cutesv	ONT	szro-50-200	notr	0.230769
HG002	15	SV (DEL)	114201	35	69	HGSVC (Freeze 4)	sniffles	ONT	szro-50-200	all	0.507246
HG002	15	SV (DEL)	114201	35	68	HGSVC (Freeze 4)	sniffles	ONT	szro-50-200	notr	0.514706
HG002	15	SV (INS)	20380	20	41	HGSVC (Freeze 4)	sniffles	ONT	szro-50-200	all	0.487805
HG002	15	SV (INS)	20380	18	39	HGSVC (Freeze 4)	sniffles	ONT	szro-50-200	notr	0.461538
HG002	15	SV (DEL)	45516	28	69	HGSVC (Freeze 4)	svim	ONT	szro-50-200	all	0.405797
HG002	15	SV (DEL)	45516	28	68	HGSVC (Freeze 4)	svim	ONT	szro-50-200	notr	0.411765
HG002	15	SV (INS)	12657	10	41	HGSVC (Freeze 4)	svim	ONT	szro-50-200	all	0.243902
HG002	15	SV (INS)	12657	9	39	HGSVC (Freeze 4)	svim	ONT	szro-50-200	notr	0.230769
HG002	15	SV (DEL)	9636	0	69	HGSVC (Freeze 4)	delly	ONT	szro-50-200	all	0
HG002	15	SV (DEL)	9636	0	68	HGSVC (Freeze 4)	delly	ONT	szro-50-200	notr	0
HG002	15	SV (INS)	6204	0	41	HGSVC (Freeze 4)	delly	ONT	szro-50-200	all	0
HG002	15	SV (INS)	6144	0	39	HGSVC (Freeze 4)	delly	ONT	szro-50-200	notr	0
HG002	15	SV (DEL)	55668	39	69	HGSVC (Freeze 4)	cutesv	UL-ONT	szro-50-200	all	0.565217
HG002	15	SV (DEL)	55668	39	68	HGSVC (Freeze 4)	cutesv	UL-ONT	szro-50-200	notr	0.573529
HG002	15	SV (INS)	24292	20	41	HGSVC (Freeze 4)	cutesv	UL-ONT	szro-50-200	all	0.487805
HG002	15	SV (INS)	24292	18	39	HGSVC (Freeze 4)	cutesv	UL-ONT	szro-50-200	notr	0.461538
HG002	15	SV (DEL)	45516	38	69	HGSVC (Freeze 4)	sniffles	UL-ONT	szro-50-200	all	0.550725
HG002	15	SV (DEL)	45516	38	68	HGSVC (Freeze 4)	sniffles	UL-ONT	szro-50-200	notr	0.558824
HG002	15	SV (INS)	27910	22	41	HGSVC (Freeze 4)	sniffles	UL-ONT	szro-50-200	all	0.536585
HG002	15	SV (INS)	27910	19	39	HGSVC (Freeze 4)	sniffles	UL-ONT	szro-50-200	notr	0.487179
HG002	15	SV (DEL)	45516	38	69	HGSVC (Freeze 4)	svim	UL-ONT	szro-50-200	all	0.550725
HG002	15	SV (DEL)	45516	38	68	HGSVC (Freeze 4)	svim	UL-ONT	szro-50-200	notr	0.558824
HG002	15	SV (INS)	20949	20	41	HGSVC (Freeze 4)	svim	UL-ONT	szro-50-200	all	0.487805
HG002	15	SV (INS)	20949	18	39	HGSVC (Freeze 4)	svim	UL-ONT	szro-50-200	notr	0.461538
HG002	15	SV (DEL)	9636	0	69	HGSVC (Freeze 4)	delly	UL-ONT	szro-50-200	all	0
HG002	15	SV (DEL)	9636	0	68	HGSVC (Freeze 4)	delly	UL-ONT	szro-50-200	notr	0
HG002	15	SV (INS)	6204	0	41	HGSVC (Freeze 4)	delly	UL-ONT	szro-50-200	all	0
HG002	15	SV (INS)	6160	0	39	HGSVC (Freeze 4)	delly	UL-ONT	szro-50-200	notr	0
HG002	17	SV (DEL)	55668	38	69	HGSVC (Freeze 4)	cutesv	HiFi	szro-50-200	all	0.550725
HG002	17	SV (DEL)	55668	37	68	HGSVC (Freeze 4)	cutesv	HiFi	szro-50-200	notr	0.544118
HG002	17	SV (INS)	12142	3	41	HGSVC (Freeze 4)	cutesv	HiFi	szro-50-200	all	0.0731707
HG002	17	SV (INS)	12142	3	39	HGSVC (Freeze 4)	cutesv	HiFi	szro-50-200	notr	0.0769231
HG002	17	SV (DEL)	55668	40	69	HGSVC (Freeze 4)	pbsv	HiFi	szro-50-200	all	0.57971
HG002	17	SV (DEL)	55668	40	68	HGSVC (Freeze 4)	pbsv	HiFi	szro-50-200	notr	0.588235
HG002	17	SV (INS)	12142	4	41	HGSVC (Freeze 4)	pbsv	HiFi	szro-50-200	all	0.097561
HG002	17	SV (INS)	12142	4	39	HGSVC (Freeze 4)	pbsv	HiFi	szro-50-200	notr	0.102564
HG002	17	SV (DEL)	114201	35	69	HGSVC (Freeze 4)	sniffles	HiFi	szro-50-200	all	0.507246
HG002	17	SV (DEL)	114201	35	68	HGSVC (Freeze 4)	sniffles	HiFi	szro-50-200	notr	0.514706
HG002	17	SV (INS)	20153	11	41	HGSVC (Freeze 4)	sniffles	HiFi	szro-50-200	all	0.268293
HG002	17	SV (INS)	20153	9	39	HGSVC (Freeze 4)	sniffles	HiFi	szro-50-200	notr	0.230769
HG002	17	SV (DEL)	45516	32	69	HGSVC (Freeze 4)	svim	HiFi	szro-50-200	all	0.463768
HG002	17	SV (DEL)	45516	32	68	HGSVC (Freeze 4)	svim	HiFi	szro-50-200	notr	0.470588
HG002	17	SV (INS)	12142	2	41	HGSVC (Freeze 4)	svim	HiFi	szro-50-200	all	0.0487805
HG002	17	SV (INS)	12142	2	39	HGSVC (Freeze 4)	svim	HiFi	szro-50-200	notr	0.0512821
HG002	17	SV (DEL)	9661	0	69	HGSVC (Freeze 4)	delly	HiFi	szro-50-200	all	0
HG002	17	SV (DEL)	9661	0	68	HGSVC (Freeze 4)	delly	HiFi	szro-50-200	notr	0
HG002	17	SV (INS)	6375	0	41	HGSVC (Freeze 4)	delly	HiFi	szro-50-200	all	0
HG002	17	SV (INS)	6160	0	39	HGSVC (Freeze 4)	delly	HiFi	szro-50-200	notr	0
HG002	17	SV (DEL)	45516	38	69	HGSVC (Freeze 4)	cutesv	ONT	szro-50-200	all	0.550725
HG002	17	SV (DEL)	45516	38	68	HGSVC (Freeze 4)	cutesv	ONT	szro-50-200	notr	0.558824
HG002	17	SV (INS)	16980	10	41	HGSVC (Freeze 4)	cutesv	ONT	szro-50-200	all	0.243902
HG002	17	SV (INS)	16980	10	39	HGSVC (Freeze 4)	cutesv	ONT	szro-50-200	notr	0.25641
HG002	17	SV (DEL)	114201	39	69	HGSVC (Freeze 4)	sniffles	ONT	szro-50-200	all	0.565217
HG002	17	SV (DEL)	114201	39	68	HGSVC (Freeze 4)	sniffles	ONT	szro-50-200	notr	0.573529
HG002	17	SV (INS)	20153	18	41	HGSVC (Freeze 4)	sniffles	ONT	szro-50-200	all	0.439024
HG002	17	SV (INS)	20153	15	39	HGSVC (Freeze 4)	sniffles	ONT	szro-50-200	notr	0.384615
HG002	17	SV (DEL)	45516	36	69	HGSVC (Freeze 4)	svim	ONT	szro-50-200	all	0.521739
HG002	17	SV (DEL)	45516	36	68	HGSVC (Freeze 4)	svim	ONT	szro-50-200	notr	0.529412
HG002	17	SV (INS)	16980	11	41	HGSVC (Freeze 4)	svim	ONT	szro-50-200	all	0.268293
HG002	17	SV (INS)	16980	10	39	HGSVC (Freeze 4)	svim	ONT	szro-50-200	notr	0.25641
HG002	17	SV (DEL)	9636	0	69	HGSVC (Freeze 4)	delly	ONT	szro-50-200	all	0
HG002	17	SV (DEL)	9636	0	68	HGSVC (Freeze 4)	delly	ONT	szro-50-200	notr	0
HG002	17	SV (INS)	7911	0	41	HGSVC (Freeze 4)	delly	ONT	szro-50-200	all	0
HG002	17	SV (INS)	6160	0	39	HGSVC (Freeze 4)	delly	ONT	szro-50-200	notr	0
HG002	17	SV (DEL)	55668	46	69	HGSVC (Freeze 4)	cutesv	UL-ONT	szro-50-200	all	0.666667
HG002	17	SV (DEL)	55668	46	68	HGSVC (Freeze 4)	cutesv	UL-ONT	szro-50-200	notr	0.676471
HG002	17	SV (INS)	24292	18	41	HGSVC (Freeze 4)	cutesv	UL-ONT	szro-50-200	all	0.439024
HG002	17	SV (INS)	24292	16	39	HGSVC (Freeze 4)	cutesv	UL-ONT	szro-50-200	notr	0.410256
HG002	17	SV (DEL)	45516	42	69	HGSVC (Freeze 4)	sniffles	UL-ONT	szro-50-200	all	0.608696
HG002	17	SV (DEL)	45516	41	68	HGSVC (Freeze 4)	sniffles	UL-ONT	szro-50-200	notr	0.602941
HG002	17	SV (INS)	27910	23	41	HGSVC (Freeze 4)	sniffles	UL-ONT	szro-50-200	all	0.560976
HG002	17	SV (INS)	27910	20	39	HGSVC (Freeze 4)	sniffles	UL-ONT	szro-50-200	notr	0.512821
HG002	17	SV (DEL)	45516	38	69	HGSVC (Freeze 4)	svim	UL-ONT	szro-50-200	all	0.550725
HG002	17	SV (DEL)	45516	38	68	HGSVC (Freeze 4)	svim	UL-ONT	szro-50-200	notr	0.558824
HG002	17	SV (INS)	20949	19	41	HGSVC (Freeze 4)	svim	UL-ONT	szro-50-200	all	0.463415
HG002	17	SV (INS)	20949	17	39	HGSVC (Freeze 4)	svim	UL-ONT	szro-50-200	notr	0.435897
HG002	17	SV (DEL)	9636	0	69	HGSVC (Freeze 4)	delly	UL-ONT	szro-50-200	all	0
HG002	17	SV (DEL)	9636	0	68	HGSVC (Freeze 4)	delly	UL-ONT	szro-50-200	notr	0
HG002	17	SV (INS)	6241	0	41	HGSVC (Freeze 4)	delly	UL-ONT	szro-50-200	all	0
HG002	17	SV (INS)	6241	0	39	HGSVC (Freeze 4)	delly	UL-ONT	szro-50-200	notr	0
HG002	20	SV (DEL)	55668	39	69	HGSVC (Freeze 4)	cutesv	HiFi	szro-50-200	all	0.565217
HG002	20	SV (DEL)	55668	38	68	HGSVC (Freeze 4)	cutesv	HiFi	szro-50-200	notr	0.558824
HG002	20	SV (INS)	12597	4	41	HGSVC (Freeze 4)	cutesv	HiFi	szro-50-200	all	0.097561
HG002	20	SV (INS)	12597	4	39	HGSVC (Freeze 4)	cutesv	HiFi	szro-50-200	notr	0.102564
HG002	20	SV (DEL)	55668	37	69	HGSVC (Freeze 4)	pbsv	HiFi	szro-50-200	all	0.536232
HG002	20	SV (DEL)	55668	37	68	HGSVC (Freeze 4)	pbsv	HiFi	szro-50-200	notr	0.544118
HG002	20	SV (INS)	12657	6	41	HGSVC (Freeze 4)	pbsv	HiFi	szro-50-200	all	0.146341
HG002	20	SV (INS)	12657	6	39	HGSVC (Freeze 4)	pbsv	HiFi	szro-50-200	notr	0.153846
HG002	20	SV (DEL)	114201	36	69	HGSVC (Freeze 4)	sniffles	HiFi	szro-50-200	all	0.521739
HG002	20	SV (DEL)	114201	35	68	HGSVC (Freeze 4)	sniffles	HiFi	szro-50-200	notr	0.514706
HG002	20	SV (INS)	20153	13	41	HGSVC (Freeze 4)	sniffles	HiFi	szro-50-200	all	0.317073
HG002	20	SV (INS)	20153	10	39	HGSVC (Freeze 4)	sniffles	HiFi	szro-50-200	notr	0.25641
HG002	20	SV (DEL)	45516	31	69	HGSVC (Freeze 4)	svim	HiFi	szro-50-200	all	0.449275
HG002	20	SV (DEL)	45516	31	68	HGSVC (Freeze 4)	svim	HiFi	szro-50-200	notr	0.455882
HG002	20	SV (INS)	10490	3	41	HGSVC (Freeze 4)	svim	HiFi	szro-50-200	all	0.0731707
HG002	20	SV (INS)	10490	3	39	HGSVC (Freeze 4)	svim	HiFi	szro-50-200	notr	0.0769231
HG002	20	SV (DEL)	9661	0	69	HGSVC (Freeze 4)	delly	HiFi	szro-50-200	all	0
HG002	20	SV (DEL)	9661	0	68	HGSVC (Freeze 4)	delly	HiFi	szro-50-200	notr	0
HG002	20	SV (INS)	6375	0	41	HGSVC (Freeze 4)	delly	HiFi	szro-50-200	all	0
HG002	20	SV (INS)	6160	0	39	HGSVC (Freeze 4)	delly	HiFi	szro-50-200	notr	0
HG002	20	SV (DEL)	55668	41	69	HGSVC (Freeze 4)	cutesv	ONT	szro-50-200	all	0.594203
HG002	20	SV (DEL)	55668	41	68	HGSVC (Freeze 4)	cutesv	ONT	szro-50-200	notr	0.602941
HG002	20	SV (INS)	20153	12	41	HGSVC (Freeze 4)	cutesv	ONT	szro-50-200	all	0.292683
HG002	20	SV (INS)	20153	11	39	HGSVC (Freeze 4)	cutesv	ONT	szro-50-200	notr	0.282051
HG002	20	SV (DEL)	114201	39	69	HGSVC (Freeze 4)	sniffles	ONT	szro-50-200	all	0.565217
HG002	20	SV (DEL)	114201	38	68	HGSVC (Freeze 4)	sniffles	ONT	szro-50-200	notr	0.558824
HG002	20	SV (INS)	20153	18	41	HGSVC (Freeze 4)	sniffles	ONT	szro-50-200	all	0.439024
HG002	20	SV (INS)	20153	17	39	HGSVC (Freeze 4)	sniffles	ONT	szro-50-200	notr	0.435897
HG002	20	SV (DEL)	45516	33	69	HGSVC (Freeze 4)	svim	ONT	szro-50-200	all	0.478261
HG002	20	SV (DEL)	45516	33	68	HGSVC (Freeze 4)	svim	ONT	szro-50-200	notr	0.485294
HG002	20	SV (INS)	20153	11	41	HGSVC (Freeze 4)	svim	ONT	szro-50-200	all	0.268293
HG002	20	SV (INS)	20153	10	39	HGSVC (Freeze 4)	svim	ONT	szro-50-200	notr	0.25641
HG002	20	SV (DEL)	9636	0	69	HGSVC (Freeze 4)	delly	ONT	szro-50-200	all	0
HG002	20	SV (DEL)	9636	0	68	HGSVC (Freeze 4)	delly	ONT	szro-50-200	notr	0
HG002	20	SV (INS)	7911	0	41	HGSVC (Freeze 4)	delly	ONT	szro-50-200	all	0
HG002	20	SV (INS)	6160	0	39	HGSVC (Freeze 4)	delly	ONT	szro-50-200	notr	0
HG002	20	SV (DEL)	55668	42	69	HGSVC (Freeze 4)	cutesv	UL-ONT	szro-50-200	all	0.608696
HG002	20	SV (DEL)	55668	42	68	HGSVC (Freeze 4)	cutesv	UL-ONT	szro-50-200	notr	0.617647
HG002	20	SV (INS)	24292	21	41	HGSVC (Freeze 4)	cutesv	UL-ONT	szro-50-200	all	0.512195
HG002	20	SV (INS)	24292	19	39	HGSVC (Freeze 4)	cutesv	UL-ONT	szro-50-200	notr	0.487179
HG002	20	SV (DEL)	114201	41	69	HGSVC (Freeze 4)	sniffles	UL-ONT	szro-50-200	all	0.594203
HG002	20	SV (DEL)	114201	41	68	HGSVC (Freeze 4)	sniffles	UL-ONT	szro-50-200	notr	0.602941
HG002	20	SV (INS)	27910	22	41	HGSVC (Freeze 4)	sniffles	UL-ONT	szro-50-200	all	0.536585
HG002	20	SV (INS)	27910	19	39	HGSVC (Freeze 4)	sniffles	UL-ONT	szro-50-200	notr	0.487179
HG002	20	SV (DEL)	45516	38	69	HGSVC (Freeze 4)	svim	UL-ONT	szro-50-200	all	0.550725
HG002	20	SV (DEL)	45516	38	68	HGSVC (Freeze 4)	svim	UL-ONT	szro-50-200	notr	0.558824
HG002	20	SV (INS)	20949	20	41	HGSVC (Freeze 4)	svim	UL-ONT	szro-50-200	all	0.487805
HG002	20	SV (INS)	20949	18	39	HGSVC (Freeze 4)	svim	UL-ONT	szro-50-200	notr	0.461538
HG002	20	SV (DEL)	9636	0	69	HGSVC (Freeze 4)	delly	UL-ONT	szro-50-200	all	0
HG002	20	SV (DEL)	9636	0	68	HGSVC (Freeze 4)	delly	UL-ONT	szro-50-200	notr	0
HG002	20	SV (INS)	6204	0	41	HGSVC (Freeze 4)	delly	UL-ONT	szro-50-200	all	0
HG002	20	SV (INS)	6160	0	39	HGSVC (Freeze 4)	delly	UL-ONT	szro-50-200	notr	0
HG002	25	SV (DEL)	55668	40	69	HGSVC (Freeze 4)	cutesv	HiFi	szro-50-200	all	0.57971
HG002	25	SV (DEL)	55668	39	68	HGSVC (Freeze 4)	cutesv	HiFi	szro-50-200	notr	0.573529
HG002	25	SV (INS)	12597	5	41	HGSVC (Freeze 4)	cutesv	HiFi	szro-50-200	all	0.121951
HG002	25	SV (INS)	12597	5	39	HGSVC (Freeze 4)	cutesv	HiFi	szro-50-200	notr	0.128205
HG002	25	SV (DEL)	55668	42	69	HGSVC (Freeze 4)	pbsv	HiFi	szro-50-200	all	0.608696
HG002	25	SV (DEL)	55668	41	68	HGSVC (Freeze 4)	pbsv	HiFi	szro-50-200	notr	0.602941
HG002	25	SV (INS)	12657	8	41	HGSVC (Freeze 4)	pbsv	HiFi	szro-50-200	all	0.195122
HG002	25	SV (INS)	12657	8	39	HGSVC (Freeze 4)	pbsv	HiFi	szro-50-200	notr	0.205128
HG002	25	SV (DEL)	45516	35	69	HGSVC (Freeze 4)	sniffles	HiFi	szro-50-200	all	0.507246
HG002	25	SV (DEL)	45516	35	68	HGSVC (Freeze 4)	sniffles	HiFi	szro-50-200	notr	0.514706
HG002	25	SV (INS)	20153	12	41	HGSVC (Freeze 4)	sniffles	HiFi	szro-50-200	all	0.292683
HG002	25	SV (INS)	20153	11	39	HGSVC (Freeze 4)	sniffles	HiFi	szro-50-200	notr	0.282051
HG002	25	SV (DEL)	45516	33	69	HGSVC (Freeze 4)	svim	HiFi	szro-50-200	all	0.478261
HG002	25	SV (DEL)	45516	33	68	HGSVC (Freeze 4)	svim	HiFi	szro-50-200	notr	0.485294
HG002	25	SV (INS)	11129	4	41	HGSVC (Freeze 4)	svim	HiFi	szro-50-200	all	0.097561
HG002	25	SV (INS)	11129	4	39	HGSVC (Freeze 4)	svim	HiFi	szro-50-200	notr	0.102564
HG002	25	SV (DEL)	9661	0	69	HGSVC (Freeze 4)	delly	HiFi	szro-50-200	all	0
HG002	25	SV (DEL)	9661	0	68	HGSVC (Freeze 4)	delly	HiFi	szro-50-200	notr	0
HG002	25	SV (INS)	7911	0	41	HGSVC (Freeze 4)	delly	HiFi	szro-50-200	all	0
HG002	25	SV (INS)	6144	0	39	HGSVC (Freeze 4)	delly	HiFi	szro-50-200	notr	0
HG002	25	SV (DEL)	45516	41	69	HGSVC (Freeze 4)	cutesv	ONT	szro-50-200	all	0.594203
HG002	25	SV (DEL)	45516	41	68	HGSVC (Freeze 4)	cutesv	ONT	szro-50-200	notr	0.602941
HG002	25	SV (INS)	24292	14	41	HGSVC (Freeze 4)	cutesv	ONT	szro-50-200	all	0.341463
HG002	25	SV (INS)	24292	13	39	HGSVC (Freeze 4)	cutesv	ONT	szro-50-200	notr	0.333333
HG002	25	SV (DEL)	114201	40	69	HGSVC (Freeze 4)	sniffles	ONT	szro-50-200	all	0.57971
HG002	25	SV (DEL)	114201	40	68	HGSVC (Freeze 4)	sniffles	ONT	szro-50-200	notr	0.588235
HG002	25	SV (INS)	20153	21	41	HGSVC (Freeze 4)	sniffles	ONT	szro-50-200	all	0.512195
HG002	25	SV (INS)	20153	18	39	HGSVC (Freeze 4)	sniffles	ONT	szro-50-200	notr	0.461538
HG002	25	SV (DEL)	45516	36	69	HGSVC (Freeze 4)	svim	ONT	szro-50-200	all	0.521739
HG002	25	SV (DEL)	45516	36	68	HGSVC (Freeze 4)	svim	ONT	szro-50-200	notr	0.529412
HG002	25	SV (INS)	20153	14	41	HGSVC (Freeze 4)	svim	ONT	szro-50-200	all	0.341463
HG002	25	SV (INS)	20153	13	39	HGSVC (Freeze 4)	svim	ONT	szro-50-200	notr	0.333333
HG002	25	SV (DEL)	9661	0	69	HGSVC (Freeze 4)	delly	ONT	szro-50-200	all	0
HG002	25	SV (DEL)	9661	0	68	HGSVC (Freeze 4)	delly	ONT	szro-50-200	notr	0
HG002	25	SV (INS)	7911	0	41	HGSVC (Freeze 4)	delly	ONT	szro-50-200	all	0
HG002	25	SV (INS)	6160	0	39	HGSVC (Freeze 4)	delly	ONT	szro-50-200	notr	0
HG002	25	SV (DEL)	55668	46	69	HGSVC (Freeze 4)	cutesv	UL-ONT	szro-50-200	all	0.666667
HG002	25	SV (DEL)	55668	46	68	HGSVC (Freeze 4)	cutesv	UL-ONT	szro-50-200	notr	0.676471
HG002	25	SV (INS)	24292	19	41	HGSVC (Freeze 4)	cutesv	UL-ONT	szro-50-200	all	0.463415
HG002	25	SV (INS)	24292	17	39	HGSVC (Freeze 4)	cutesv	UL-ONT	szro-50-200	notr	0.435897
HG002	25	SV (DEL)	114201	42	69	HGSVC (Freeze 4)	sniffles	UL-ONT	szro-50-200	all	0.608696
HG002	25	SV (DEL)	114201	42	68	HGSVC (Freeze 4)	sniffles	UL-ONT	szro-50-200	notr	0.617647
HG002	25	SV (INS)	27910	22	41	HGSVC (Freeze 4)	sniffles	UL-ONT	szro-50-200	all	0.536585
HG002	25	SV (INS)	27910	19	39	HGSVC (Freeze 4)	sniffles	UL-ONT	szro-50-200	notr	0.487179
HG002	25	SV (DEL)	45516	40	69	HGSVC (Freeze 4)	svim	UL-ONT	szro-50-200	all	0.57971
HG002	25	SV (DEL)	45516	40	68	HGSVC (Freeze 4)	svim	UL-ONT	szro-50-200	notr	0.588235
HG002	25	SV (INS)	20949	20	41	HGSVC (Freeze 4)	svim	UL-ONT	szro-50-200	all	0.487805
HG002	25	SV (INS)	20949	18	39	HGSVC (Freeze 4)	svim	UL-ONT	szro-50-200	notr	0.461538
HG002	25	SV (DEL)	9636	0	69	HGSVC (Freeze 4)	delly	UL-ONT	szro-50-200	all	0
HG002	25	SV (DEL)	9636	0	68	HGSVC (Freeze 4)	delly	UL-ONT	szro-50-200	notr	0
HG002	25	SV (INS)	6204	0	41	HGSVC (Freeze 4)	delly	UL-ONT	szro-50-200	all	0
HG002	25	SV (INS)	6160	0	39	HGSVC (Freeze 4)	delly	UL-ONT	szro-50-200	notr	0
HG002	30	SV (DEL)	45516	40	69	HGSVC (Freeze 4)	cutesv	HiFi	szro-50-200	all	0.57971
HG002	30	SV (DEL)	45516	39	68	HGSVC (Freeze 4)	cutesv	HiFi	szro-50-200	notr	0.573529
HG002	30	SV (INS)	12597	5	41	HGSVC (Freeze 4)	cutesv	HiFi	szro-50-200	all	0.121951
HG002	30	SV (INS)	12597	5	39	HGSVC (Freeze 4)	cutesv	HiFi	szro-50-200	notr	0.128205
HG002	30	SV (DEL)	55668	41	69	HGSVC (Freeze 4)	pbsv	HiFi	szro-50-200	all	0.594203
HG002	30	SV (DEL)	55668	41	68	HGSVC (Freeze 4)	pbsv	HiFi	szro-50-200	notr	0.602941
HG002	30	SV (INS)	12597	5	41	HGSVC (Freeze 4)	pbsv	HiFi	szro-50-200	all	0.121951
HG002	30	SV (INS)	12597	5	39	HGSVC (Freeze 4)	pbsv	HiFi	szro-50-200	notr	0.128205
HG002	30	SV (DEL)	114201	37	69	HGSVC (Freeze 4)	sniffles	HiFi	szro-50-200	all	0.536232
HG002	30	SV (DEL)	114201	37	68	HGSVC (Freeze 4)	sniffles	HiFi	szro-50-200	notr	0.544118
HG002	30	SV (INS)	20153	15	41	HGSVC (Freeze 4)	sniffles	HiFi	szro-50-200	all	0.365854
HG002	30	SV (INS)	20153	12	39	HGSVC (Freeze 4)	sniffles	HiFi	szro-50-200	notr	0.307692
HG002	30	SV (DEL)	45516	35	69	HGSVC (Freeze 4)	svim	HiFi	szro-50-200	all	0.507246
HG002	30	SV (DEL)	45516	35	68	HGSVC (Freeze 4)	svim	HiFi	szro-50-200	notr	0.514706
HG002	30	SV (INS)	11129	2	41	HGSVC (Freeze 4)	svim	HiFi	szro-50-200	all	0.0487805
HG002	30	SV (INS)	11129	2	39	HGSVC (Freeze 4)	svim	HiFi	szro-50-200	notr	0.0512821
HG002	30	SV (DEL)	9661	0	69	HGSVC (Freeze 4)	delly	HiFi	szro-50-200	all	0
HG002	30	SV (DEL)	9661	0	68	HGSVC (Freeze 4)	delly	HiFi	szro-50-200	notr	0
HG002	30	SV (INS)	7911	0	41	HGSVC (Freeze 4)	delly	HiFi	szro-50-200	all	0
HG002	30	SV (INS)	6122	0	39	HGSVC (Freeze 4)	delly	HiFi	szro-50-200	notr	0
HG002	30	SV (DEL)	45516	40	69	HGSVC (Freeze 4)	cutesv	ONT	szro-50-200	all	0.57971
HG002	30	SV (DEL)	45516	39	68	HGSVC (Freeze 4)	cutesv	ONT	szro-50-200	notr	0.573529
HG002	30	SV (INS)	24292	15	41	HGSVC (Freeze 4)	cutesv	ONT	szro-50-200	all	0.365854
HG002	30	SV (INS)	24292	14	39	HGSVC (Freeze 4)	cutesv	ONT	szro-50-200	notr	0.358974
HG002	30	SV (DEL)	114201	41	69	HGSVC (Freeze 4)	sniffles	ONT	szro-50-200	all	0.594203
HG002	30	SV (DEL)	114201	40	68	HGSVC (Freeze 4)	sniffles	ONT	szro-50-200	notr	0.588235
HG002	30	SV (INS)	20153	20	41	HGSVC (Freeze 4)	sniffles	ONT	szro-50-200	all	0.487805
HG002	30	SV (INS)	20153	17	39	HGSVC (Freeze 4)	sniffles	ONT	szro-50-200	notr	0.435897
HG002	30	SV (DEL)	45516	38	69	HGSVC (Freeze 4)	svim	ONT	szro-50-200	all	0.550725
HG002	30	SV (DEL)	45516	37	68	HGSVC (Freeze 4)	svim	ONT	szro-50-200	notr	0.544118
HG002	30	SV (INS)	20153	13	41	HGSVC (Freeze 4)	svim	ONT	szro-50-200	all	0.317073
HG002	30	SV (INS)	20153	12	39	HGSVC (Freeze 4)	svim	ONT	szro-50-200	notr	0.307692
HG002	30	SV (DEL)	9636	0	69	HGSVC (Freeze 4)	delly	ONT	szro-50-200	all	0
HG002	30	SV (DEL)	9636	0	68	HGSVC (Freeze 4)	delly	ONT	szro-50-200	notr	0
HG002	30	SV (INS)	6375	0	41	HGSVC (Freeze 4)	delly	ONT	szro-50-200	all	0
HG002	30	SV (INS)	6160	0	39	HGSVC (Freeze 4)	delly	ONT	szro-50-200	notr	0
HG002	30	SV (DEL)	55668	45	69	HGSVC (Freeze 4)	cutesv	UL-ONT	szro-50-200	all	0.652174
HG002	30	SV (DEL)	55668	45	68	HGSVC (Freeze 4)	cutesv	UL-ONT	szro-50-200	notr	0.661765
HG002	30	SV (INS)	24292	19	41	HGSVC (Freeze 4)	cutesv	UL-ONT	szro-50-200	all	0.463415
HG002	30	SV (INS)	24292	17	39	HGSVC (Freeze 4)	cutesv	UL-ONT	szro-50-200	notr	0.435897
HG002	30	SV (DEL)	45516	42	69	HGSVC (Freeze 4)	sniffles	UL-ONT	szro-50-200	all	0.608696
HG002	30	SV (DEL)	45516	41	68	HGSVC (Freeze 4)	sniffles	UL-ONT	szro-50-200	notr	0.602941
HG002	30	SV (INS)	20380	21	41	HGSVC (Freeze 4)	sniffles	UL-ONT	szro-50-200	all	0.512195
HG002	30	SV (INS)	20380	18	39	HGSVC (Freeze 4)	sniffles	UL-ONT	szro-50-200	notr	0.461538
HG002	30	SV (DEL)	45516	40	69	HGSVC (Freeze 4)	svim	UL-ONT	szro-50-200	all	0.57971
HG002	30	SV (DEL)	45516	40	68	HGSVC (Freeze 4)	svim	UL-ONT	szro-50-200	notr	0.588235
HG002	30	SV (INS)	20949	19	41	HGSVC (Freeze 4)	svim	UL-ONT	szro-50-200	all	0.463415
HG002	30	SV (INS)	20949	17	39	HGSVC (Freeze 4)	svim	UL-ONT	szro-50-200	notr	0.435897
HG002	30	SV (DEL)	9636	0	69	HGSVC (Freeze 4)	delly	UL-ONT	szro-50-200	all	0
HG002	30	SV (DEL)	9636	0	68	HGSVC (Freeze 4)	delly	UL-ONT	szro-50-200	notr	0
HG002	30	SV (INS)	7911	0	41	HGSVC (Freeze 4)	delly	UL-ONT	szro-50-200	all	0
HG002	30	SV (INS)	6160	0	39	HGSVC (Freeze 4)	delly	UL-ONT	szro-50-200	notr	0
