# Supplementary material for: Whole-genome long-read sequencing downsampling and its effect on variant-calling precision and recall
Source: Genome Res. 2023 Dec;33(12):2029–40. doi: 10.1101/gr.278070.123 (PMC10760522; doi:10.1101/gr.278070.123)
Supplement: Supplement 15 [file Supplemental_Table_S13.xlsx]

## Sheet: S13
S13 - SV calls above 50 kbp (assembly-based)
SAMPLE	COVERAGE	SVTYPE	SV_MAX	LARGE_SV	LARGE_SV_TRUTH	TRUTHSET	CALLER	TECH	MERGE	FILTER	LARGE_RECALL
HG00733	5	SV (INS)	27836	4	40	HGSVC (Freeze 4)	PAV (PGAS)	HiFi	szro-50-200	all	0.1
HG00733	5	SV (INS)	27836	4	36	HGSVC (Freeze 4)	PAV (PGAS)	HiFi	szro-50-200	notr	0.111111
HG00733	5	SV (DEL)	43365	8	63	HGSVC (Freeze 4)	PAV (PGAS)	HiFi	szro-50-200	all	0.126984
HG00733	5	SV (DEL)	43365	8	62	HGSVC (Freeze 4)	PAV (PGAS)	HiFi	szro-50-200	notr	0.129032
HG00733	5	SV (INS)	27836	7	40	HGSVC (Freeze 4)	PAV (hifiasm)	HiFi	szro-50-200	all	0.175
HG00733	5	SV (INS)	27836	5	36	HGSVC (Freeze 4)	PAV (hifiasm)	HiFi	szro-50-200	notr	0.138889
HG00733	5	SV (DEL)	55501	13	63	HGSVC (Freeze 4)	PAV (hifiasm)	HiFi	szro-50-200	all	0.206349
HG00733	5	SV (DEL)	55501	13	62	HGSVC (Freeze 4)	PAV (hifiasm)	HiFi	szro-50-200	notr	0.209677
HG00733	5	SV (INS)	51666	7	40	HGSVC (Freeze 4)	PAV (hifiasm-trio)	HiFi	szro-50-200	all	0.175
HG00733	5	SV (INS)	51666	5	36	HGSVC (Freeze 4)	PAV (hifiasm-trio)	HiFi	szro-50-200	notr	0.138889
HG00733	5	SV (DEL)	43365	13	63	HGSVC (Freeze 4)	PAV (hifiasm-trio)	HiFi	szro-50-200	all	0.206349
HG00733	5	SV (DEL)	43365	13	62	HGSVC (Freeze 4)	PAV (hifiasm-trio)	HiFi	szro-50-200	notr	0.209677
HG00733	5	SV (INS)	32251	13	40	HGSVC (Freeze 4)	svimASM (hifiasm-trio)	HiFi	szro-50-200	all	0.325
HG00733	5	SV (INS)	32251	10	36	HGSVC (Freeze 4)	svimASM (hifiasm-trio)	HiFi	szro-50-200	notr	0.277778
HG00733	5	SV (DEL)	55501	21	63	HGSVC (Freeze 4)	svimASM (hifiasm-trio)	HiFi	szro-50-200	all	0.333333
HG00733	5	SV (DEL)	55501	21	62	HGSVC (Freeze 4)	svimASM (hifiasm-trio)	HiFi	szro-50-200	notr	0.33871
HG00733	5	SV (INS)	47295	10	40	HGSVC (Freeze 4)	PAV (Flye [ONT])	ONT	szro-50-200	all	0.25
HG00733	5	SV (INS)	47295	7	36	HGSVC (Freeze 4)	PAV (Flye [ONT])	ONT	szro-50-200	notr	0.194444
HG00733	5	SV (DEL)	100115	35	63	HGSVC (Freeze 4)	PAV (Flye [ONT])	ONT	szro-50-200	all	0.555556
HG00733	5	SV (DEL)	100115	33	62	HGSVC (Freeze 4)	PAV (Flye [ONT])	ONT	szro-50-200	notr	0.532258
HG00733	5	SV (INS)	51666	17	40	HGSVC (Freeze 4)	PAV (Flye [UL-ONT])	UL-ONT	szro-50-200	all	0.425
HG00733	5	SV (INS)	51666	12	36	HGSVC (Freeze 4)	PAV (Flye [UL-ONT])	UL-ONT	szro-50-200	notr	0.333333
HG00733	5	SV (DEL)	238803	35	63	HGSVC (Freeze 4)	PAV (Flye [UL-ONT])	UL-ONT	szro-50-200	all	0.555556
HG00733	5	SV (DEL)	238803	35	62	HGSVC (Freeze 4)	PAV (Flye [UL-ONT])	UL-ONT	szro-50-200	notr	0.564516
HG00733	8	SV (INS)	29618	14	40	HGSVC (Freeze 4)	PAV (PGAS)	HiFi	szro-50-200	all	0.35
HG00733	8	SV (INS)	27836	11	36	HGSVC (Freeze 4)	PAV (PGAS)	HiFi	szro-50-200	notr	0.305556
HG00733	8	SV (DEL)	55501	28	63	HGSVC (Freeze 4)	PAV (PGAS)	HiFi	szro-50-200	all	0.444444
HG00733	8	SV (DEL)	55501	27	62	HGSVC (Freeze 4)	PAV (PGAS)	HiFi	szro-50-200	notr	0.435484
HG00733	8	SV (INS)	51666	14	40	HGSVC (Freeze 4)	PAV (hifiasm)	HiFi	szro-50-200	all	0.35
HG00733	8	SV (INS)	51666	10	36	HGSVC (Freeze 4)	PAV (hifiasm)	HiFi	szro-50-200	notr	0.277778
HG00733	8	SV (DEL)	74461	35	63	HGSVC (Freeze 4)	PAV (hifiasm)	HiFi	szro-50-200	all	0.555556
HG00733	8	SV (DEL)	74461	34	62	HGSVC (Freeze 4)	PAV (hifiasm)	HiFi	szro-50-200	notr	0.548387
HG00733	8	SV (INS)	51666	15	40	HGSVC (Freeze 4)	PAV (hifiasm-trio)	HiFi	szro-50-200	all	0.375
HG00733	8	SV (INS)	51666	11	36	HGSVC (Freeze 4)	PAV (hifiasm-trio)	HiFi	szro-50-200	notr	0.305556
HG00733	8	SV (DEL)	74461	37	63	HGSVC (Freeze 4)	PAV (hifiasm-trio)	HiFi	szro-50-200	all	0.587302
HG00733	8	SV (DEL)	74461	36	62	HGSVC (Freeze 4)	PAV (hifiasm-trio)	HiFi	szro-50-200	notr	0.580645
HG00733	8	SV (INS)	51666	22	40	HGSVC (Freeze 4)	svimASM (hifiasm-trio)	HiFi	szro-50-200	all	0.55
HG00733	8	SV (INS)	51666	18	36	HGSVC (Freeze 4)	svimASM (hifiasm-trio)	HiFi	szro-50-200	notr	0.5
HG00733	8	SV (DEL)	100115	38	63	HGSVC (Freeze 4)	svimASM (hifiasm-trio)	HiFi	szro-50-200	all	0.603175
HG00733	8	SV (DEL)	100115	38	62	HGSVC (Freeze 4)	svimASM (hifiasm-trio)	HiFi	szro-50-200	notr	0.612903
HG00733	8	SV (INS)	51666	18	40	HGSVC (Freeze 4)	PAV (Flye [ONT])	ONT	szro-50-200	all	0.45
HG00733	8	SV (INS)	51666	12	36	HGSVC (Freeze 4)	PAV (Flye [ONT])	ONT	szro-50-200	notr	0.333333
HG00733	8	SV (DEL)	100115	33	63	HGSVC (Freeze 4)	PAV (Flye [ONT])	ONT	szro-50-200	all	0.52381
HG00733	8	SV (DEL)	100115	31	62	HGSVC (Freeze 4)	PAV (Flye [ONT])	ONT	szro-50-200	notr	0.5
HG00733	8	SV (INS)	32251	19	40	HGSVC (Freeze 4)	PAV (Flye [UL-ONT])	UL-ONT	szro-50-200	all	0.475
HG00733	8	SV (INS)	32251	15	36	HGSVC (Freeze 4)	PAV (Flye [UL-ONT])	UL-ONT	szro-50-200	notr	0.416667
HG00733	8	SV (DEL)	238803	38	63	HGSVC (Freeze 4)	PAV (Flye [UL-ONT])	UL-ONT	szro-50-200	all	0.603175
HG00733	8	SV (DEL)	238803	37	62	HGSVC (Freeze 4)	PAV (Flye [UL-ONT])	UL-ONT	szro-50-200	notr	0.596774
HG00733	10	SV (INS)	51666	21	40	HGSVC (Freeze 4)	PAV (PGAS)	HiFi	szro-50-200	all	0.525
HG00733	10	SV (INS)	51666	15	36	HGSVC (Freeze 4)	PAV (PGAS)	HiFi	szro-50-200	notr	0.416667
HG00733	10	SV (DEL)	100115	39	63	HGSVC (Freeze 4)	PAV (PGAS)	HiFi	szro-50-200	all	0.619048
HG00733	10	SV (DEL)	100115	38	62	HGSVC (Freeze 4)	PAV (PGAS)	HiFi	szro-50-200	notr	0.612903
HG00733	10	SV (INS)	51666	26	40	HGSVC (Freeze 4)	PAV (hifiasm)	HiFi	szro-50-200	all	0.65
HG00733	10	SV (INS)	51666	20	36	HGSVC (Freeze 4)	PAV (hifiasm)	HiFi	szro-50-200	notr	0.555556
HG00733	10	SV (DEL)	100115	40	63	HGSVC (Freeze 4)	PAV (hifiasm)	HiFi	szro-50-200	all	0.634921
HG00733	10	SV (DEL)	100115	39	62	HGSVC (Freeze 4)	PAV (hifiasm)	HiFi	szro-50-200	notr	0.629032
HG00733	10	SV (INS)	51666	24	40	HGSVC (Freeze 4)	PAV (hifiasm-trio)	HiFi	szro-50-200	all	0.6
HG00733	10	SV (INS)	51666	18	36	HGSVC (Freeze 4)	PAV (hifiasm-trio)	HiFi	szro-50-200	notr	0.5
HG00733	10	SV (DEL)	100115	45	63	HGSVC (Freeze 4)	PAV (hifiasm-trio)	HiFi	szro-50-200	all	0.714286
HG00733	10	SV (DEL)	100115	43	62	HGSVC (Freeze 4)	PAV (hifiasm-trio)	HiFi	szro-50-200	notr	0.693548
HG00733	10	SV (INS)	48056	29	40	HGSVC (Freeze 4)	svimASM (hifiasm-trio)	HiFi	szro-50-200	all	0.725
HG00733	10	SV (INS)	48056	25	36	HGSVC (Freeze 4)	svimASM (hifiasm-trio)	HiFi	szro-50-200	notr	0.694444
HG00733	10	SV (DEL)	100115	43	63	HGSVC (Freeze 4)	svimASM (hifiasm-trio)	HiFi	szro-50-200	all	0.68254
HG00733	10	SV (DEL)	100115	43	62	HGSVC (Freeze 4)	svimASM (hifiasm-trio)	HiFi	szro-50-200	notr	0.693548
HG00733	10	SV (INS)	32251	19	40	HGSVC (Freeze 4)	PAV (Flye [ONT])	ONT	szro-50-200	all	0.475
HG00733	10	SV (INS)	32251	13	36	HGSVC (Freeze 4)	PAV (Flye [ONT])	ONT	szro-50-200	notr	0.361111
HG00733	10	SV (DEL)	100115	30	63	HGSVC (Freeze 4)	PAV (Flye [ONT])	ONT	szro-50-200	all	0.47619
HG00733	10	SV (DEL)	100115	29	62	HGSVC (Freeze 4)	PAV (Flye [ONT])	ONT	szro-50-200	notr	0.467742
HG00733	10	SV (INS)	48056	21	40	HGSVC (Freeze 4)	PAV (Flye [UL-ONT])	UL-ONT	szro-50-200	all	0.525
HG00733	10	SV (INS)	48056	15	36	HGSVC (Freeze 4)	PAV (Flye [UL-ONT])	UL-ONT	szro-50-200	notr	0.416667
HG00733	10	SV (DEL)	45817	32	63	HGSVC (Freeze 4)	PAV (Flye [UL-ONT])	UL-ONT	szro-50-200	all	0.507937
HG00733	10	SV (DEL)	45817	31	62	HGSVC (Freeze 4)	PAV (Flye [UL-ONT])	UL-ONT	szro-50-200	notr	0.5
HG00733	12	SV (INS)	48056	24	40	HGSVC (Freeze 4)	PAV (PGAS)	HiFi	szro-50-200	all	0.6
HG00733	12	SV (INS)	48056	19	36	HGSVC (Freeze 4)	PAV (PGAS)	HiFi	szro-50-200	notr	0.527778
HG00733	12	SV (DEL)	55501	45	63	HGSVC (Freeze 4)	PAV (PGAS)	HiFi	szro-50-200	all	0.714286
HG00733	12	SV (DEL)	55501	44	62	HGSVC (Freeze 4)	PAV (PGAS)	HiFi	szro-50-200	notr	0.709677
HG00733	12	SV (INS)	51666	25	40	HGSVC (Freeze 4)	PAV (hifiasm)	HiFi	szro-50-200	all	0.625
HG00733	12	SV (INS)	51666	20	36	HGSVC (Freeze 4)	PAV (hifiasm)	HiFi	szro-50-200	notr	0.555556
HG00733	12	SV (DEL)	47783	41	63	HGSVC (Freeze 4)	PAV (hifiasm)	HiFi	szro-50-200	all	0.650794
HG00733	12	SV (DEL)	47783	40	62	HGSVC (Freeze 4)	PAV (hifiasm)	HiFi	szro-50-200	notr	0.645161
HG00733	12	SV (INS)	51666	27	40	HGSVC (Freeze 4)	PAV (hifiasm-trio)	HiFi	szro-50-200	all	0.675
HG00733	12	SV (INS)	51666	21	36	HGSVC (Freeze 4)	PAV (hifiasm-trio)	HiFi	szro-50-200	notr	0.583333
HG00733	12	SV (DEL)	84917	48	63	HGSVC (Freeze 4)	PAV (hifiasm-trio)	HiFi	szro-50-200	all	0.761905
HG00733	12	SV (DEL)	84917	47	62	HGSVC (Freeze 4)	PAV (hifiasm-trio)	HiFi	szro-50-200	notr	0.758065
HG00733	12	SV (INS)	51666	31	40	HGSVC (Freeze 4)	svimASM (hifiasm-trio)	HiFi	szro-50-200	all	0.775
HG00733	12	SV (INS)	51666	27	36	HGSVC (Freeze 4)	svimASM (hifiasm-trio)	HiFi	szro-50-200	notr	0.75
HG00733	12	SV (DEL)	55501	43	63	HGSVC (Freeze 4)	svimASM (hifiasm-trio)	HiFi	szro-50-200	all	0.68254
HG00733	12	SV (DEL)	55501	43	62	HGSVC (Freeze 4)	svimASM (hifiasm-trio)	HiFi	szro-50-200	notr	0.693548
HG00733	12	SV (INS)	24292	18	40	HGSVC (Freeze 4)	PAV (Flye [ONT])	ONT	szro-50-200	all	0.45
HG00733	12	SV (INS)	24292	12	36	HGSVC (Freeze 4)	PAV (Flye [ONT])	ONT	szro-50-200	notr	0.333333
HG00733	12	SV (DEL)	238803	34	63	HGSVC (Freeze 4)	PAV (Flye [ONT])	ONT	szro-50-200	all	0.539683
HG00733	12	SV (DEL)	238803	33	62	HGSVC (Freeze 4)	PAV (Flye [ONT])	ONT	szro-50-200	notr	0.532258
HG00733	12	SV (INS)	24292	17	40	HGSVC (Freeze 4)	PAV (Flye [UL-ONT])	UL-ONT	szro-50-200	all	0.425
HG00733	12	SV (INS)	24292	11	36	HGSVC (Freeze 4)	PAV (Flye [UL-ONT])	UL-ONT	szro-50-200	notr	0.305556
HG00733	12	SV (DEL)	45817	33	63	HGSVC (Freeze 4)	PAV (Flye [UL-ONT])	UL-ONT	szro-50-200	all	0.52381
HG00733	12	SV (DEL)	45817	32	62	HGSVC (Freeze 4)	PAV (Flye [UL-ONT])	UL-ONT	szro-50-200	notr	0.516129
HG00733	15	SV (INS)	51666	27	40	HGSVC (Freeze 4)	PAV (PGAS)	HiFi	szro-50-200	all	0.675
HG00733	15	SV (INS)	51666	22	36	HGSVC (Freeze 4)	PAV (PGAS)	HiFi	szro-50-200	notr	0.611111
HG00733	15	SV (DEL)	84917	48	63	HGSVC (Freeze 4)	PAV (PGAS)	HiFi	szro-50-200	all	0.761905
HG00733	15	SV (DEL)	84917	47	62	HGSVC (Freeze 4)	PAV (PGAS)	HiFi	szro-50-200	notr	0.758065
HG00733	15	SV (INS)	44632	25	40	HGSVC (Freeze 4)	PAV (hifiasm)	HiFi	szro-50-200	all	0.625
HG00733	15	SV (INS)	44632	18	36	HGSVC (Freeze 4)	PAV (hifiasm)	HiFi	szro-50-200	notr	0.5
HG00733	15	SV (DEL)	84917	52	63	HGSVC (Freeze 4)	PAV (hifiasm)	HiFi	szro-50-200	all	0.825397
HG00733	15	SV (DEL)	84917	51	62	HGSVC (Freeze 4)	PAV (hifiasm)	HiFi	szro-50-200	notr	0.822581
HG00733	15	SV (INS)	44632	25	40	HGSVC (Freeze 4)	PAV (hifiasm-trio)	HiFi	szro-50-200	all	0.625
HG00733	15	SV (INS)	44632	19	36	HGSVC (Freeze 4)	PAV (hifiasm-trio)	HiFi	szro-50-200	notr	0.527778
HG00733	15	SV (DEL)	84917	52	63	HGSVC (Freeze 4)	PAV (hifiasm-trio)	HiFi	szro-50-200	all	0.825397
HG00733	15	SV (DEL)	84917	51	62	HGSVC (Freeze 4)	PAV (hifiasm-trio)	HiFi	szro-50-200	notr	0.822581
HG00733	15	SV (INS)	51666	31	40	HGSVC (Freeze 4)	svimASM (hifiasm-trio)	HiFi	szro-50-200	all	0.775
HG00733	15	SV (INS)	51666	27	36	HGSVC (Freeze 4)	svimASM (hifiasm-trio)	HiFi	szro-50-200	notr	0.75
HG00733	15	SV (DEL)	100115	47	63	HGSVC (Freeze 4)	svimASM (hifiasm-trio)	HiFi	szro-50-200	all	0.746032
HG00733	15	SV (DEL)	100115	47	62	HGSVC (Freeze 4)	svimASM (hifiasm-trio)	HiFi	szro-50-200	notr	0.758065
HG00733	15	SV (INS)	51666	23	40	HGSVC (Freeze 4)	PAV (Flye [ONT])	ONT	szro-50-200	all	0.575
HG00733	15	SV (INS)	51666	17	36	HGSVC (Freeze 4)	PAV (Flye [ONT])	ONT	szro-50-200	notr	0.472222
HG00733	15	SV (DEL)	238803	35	63	HGSVC (Freeze 4)	PAV (Flye [ONT])	ONT	szro-50-200	all	0.555556
HG00733	15	SV (DEL)	238803	34	62	HGSVC (Freeze 4)	PAV (Flye [ONT])	ONT	szro-50-200	notr	0.548387
HG00733	15	SV (INS)	51666	23	40	HGSVC (Freeze 4)	PAV (Flye [UL-ONT])	UL-ONT	szro-50-200	all	0.575
HG00733	15	SV (INS)	51666	17	36	HGSVC (Freeze 4)	PAV (Flye [UL-ONT])	UL-ONT	szro-50-200	notr	0.472222
HG00733	15	SV (DEL)	238803	40	63	HGSVC (Freeze 4)	PAV (Flye [UL-ONT])	UL-ONT	szro-50-200	all	0.634921
HG00733	15	SV (DEL)	238803	38	62	HGSVC (Freeze 4)	PAV (Flye [UL-ONT])	UL-ONT	szro-50-200	notr	0.612903
HG00733	17	SV (INS)	51666	29	40	HGSVC (Freeze 4)	PAV (PGAS)	HiFi	szro-50-200	all	0.725
HG00733	17	SV (INS)	51666	23	36	HGSVC (Freeze 4)	PAV (PGAS)	HiFi	szro-50-200	notr	0.638889
HG00733	17	SV (DEL)	100115	49	63	HGSVC (Freeze 4)	PAV (PGAS)	HiFi	szro-50-200	all	0.777778
HG00733	17	SV (DEL)	100115	48	62	HGSVC (Freeze 4)	PAV (PGAS)	HiFi	szro-50-200	notr	0.774194
HG00733	17	SV (INS)	48056	27	40	HGSVC (Freeze 4)	PAV (hifiasm)	HiFi	szro-50-200	all	0.675
HG00733	17	SV (INS)	48056	21	36	HGSVC (Freeze 4)	PAV (hifiasm)	HiFi	szro-50-200	notr	0.583333
HG00733	17	SV (DEL)	100115	51	63	HGSVC (Freeze 4)	PAV (hifiasm)	HiFi	szro-50-200	all	0.809524
HG00733	17	SV (DEL)	100115	50	62	HGSVC (Freeze 4)	PAV (hifiasm)	HiFi	szro-50-200	notr	0.806452
HG00733	17	SV (INS)	51666	29	40	HGSVC (Freeze 4)	PAV (hifiasm-trio)	HiFi	szro-50-200	all	0.725
HG00733	17	SV (INS)	51666	23	36	HGSVC (Freeze 4)	PAV (hifiasm-trio)	HiFi	szro-50-200	notr	0.638889
HG00733	17	SV (DEL)	100115	53	63	HGSVC (Freeze 4)	PAV (hifiasm-trio)	HiFi	szro-50-200	all	0.84127
HG00733	17	SV (DEL)	100115	52	62	HGSVC (Freeze 4)	PAV (hifiasm-trio)	HiFi	szro-50-200	notr	0.83871
HG00733	17	SV (INS)	51666	31	40	HGSVC (Freeze 4)	svimASM (hifiasm-trio)	HiFi	szro-50-200	all	0.775
HG00733	17	SV (INS)	51666	26	36	HGSVC (Freeze 4)	svimASM (hifiasm-trio)	HiFi	szro-50-200	notr	0.722222
HG00733	17	SV (DEL)	100115	48	63	HGSVC (Freeze 4)	svimASM (hifiasm-trio)	HiFi	szro-50-200	all	0.761905
HG00733	17	SV (DEL)	100115	48	62	HGSVC (Freeze 4)	svimASM (hifiasm-trio)	HiFi	szro-50-200	notr	0.774194
HG00733	17	SV (INS)	48056	16	40	HGSVC (Freeze 4)	PAV (Flye [ONT])	ONT	szro-50-200	all	0.4
HG00733	17	SV (INS)	48056	14	36	HGSVC (Freeze 4)	PAV (Flye [ONT])	ONT	szro-50-200	notr	0.388889
HG00733	17	SV (DEL)	100115	36	63	HGSVC (Freeze 4)	PAV (Flye [ONT])	ONT	szro-50-200	all	0.571429
HG00733	17	SV (DEL)	100115	35	62	HGSVC (Freeze 4)	PAV (Flye [ONT])	ONT	szro-50-200	notr	0.564516
HG00733	17	SV (INS)	32251	18	40	HGSVC (Freeze 4)	PAV (Flye [UL-ONT])	UL-ONT	szro-50-200	all	0.45
HG00733	17	SV (INS)	32251	12	36	HGSVC (Freeze 4)	PAV (Flye [UL-ONT])	UL-ONT	szro-50-200	notr	0.333333
HG00733	17	SV (DEL)	84917	39	63	HGSVC (Freeze 4)	PAV (Flye [UL-ONT])	UL-ONT	szro-50-200	all	0.619048
HG00733	17	SV (DEL)	84917	37	62	HGSVC (Freeze 4)	PAV (Flye [UL-ONT])	UL-ONT	szro-50-200	notr	0.596774
HG00733	20	SV (INS)	51666	31	40	HGSVC (Freeze 4)	PAV (PGAS)	HiFi	szro-50-200	all	0.775
HG00733	20	SV (INS)	51666	24	36	HGSVC (Freeze 4)	PAV (PGAS)	HiFi	szro-50-200	notr	0.666667
HG00733	20	SV (DEL)	238803	54	63	HGSVC (Freeze 4)	PAV (PGAS)	HiFi	szro-50-200	all	0.857143
HG00733	20	SV (DEL)	238803	52	62	HGSVC (Freeze 4)	PAV (PGAS)	HiFi	szro-50-200	notr	0.83871
HG00733	20	SV (INS)	51666	28	40	HGSVC (Freeze 4)	PAV (hifiasm)	HiFi	szro-50-200	all	0.7
HG00733	20	SV (INS)	51666	21	36	HGSVC (Freeze 4)	PAV (hifiasm)	HiFi	szro-50-200	notr	0.583333
HG00733	20	SV (DEL)	100115	54	63	HGSVC (Freeze 4)	PAV (hifiasm)	HiFi	szro-50-200	all	0.857143
HG00733	20	SV (DEL)	100115	52	62	HGSVC (Freeze 4)	PAV (hifiasm)	HiFi	szro-50-200	notr	0.83871
HG00733	20	SV (INS)	51666	30	40	HGSVC (Freeze 4)	PAV (hifiasm-trio)	HiFi	szro-50-200	all	0.75
HG00733	20	SV (INS)	51666	23	36	HGSVC (Freeze 4)	PAV (hifiasm-trio)	HiFi	szro-50-200	notr	0.638889
HG00733	20	SV (DEL)	238803	55	63	HGSVC (Freeze 4)	PAV (hifiasm-trio)	HiFi	szro-50-200	all	0.873016
HG00733	20	SV (DEL)	238803	54	62	HGSVC (Freeze 4)	PAV (hifiasm-trio)	HiFi	szro-50-200	notr	0.870968
HG00733	20	SV (INS)	51666	31	40	HGSVC (Freeze 4)	svimASM (hifiasm-trio)	HiFi	szro-50-200	all	0.775
HG00733	20	SV (INS)	51666	27	36	HGSVC (Freeze 4)	svimASM (hifiasm-trio)	HiFi	szro-50-200	notr	0.75
HG00733	20	SV (DEL)	100115	46	63	HGSVC (Freeze 4)	svimASM (hifiasm-trio)	HiFi	szro-50-200	all	0.730159
HG00733	20	SV (DEL)	100115	46	62	HGSVC (Freeze 4)	svimASM (hifiasm-trio)	HiFi	szro-50-200	notr	0.741935
HG00733	20	SV (INS)	51666	16	40	HGSVC (Freeze 4)	PAV (Flye [ONT])	ONT	szro-50-200	all	0.4
HG00733	20	SV (INS)	51666	14	36	HGSVC (Freeze 4)	PAV (Flye [ONT])	ONT	szro-50-200	notr	0.388889
HG00733	20	SV (DEL)	238803	38	63	HGSVC (Freeze 4)	PAV (Flye [ONT])	ONT	szro-50-200	all	0.603175
HG00733	20	SV (DEL)	238803	37	62	HGSVC (Freeze 4)	PAV (Flye [ONT])	ONT	szro-50-200	notr	0.596774
HG00733	20	SV (INS)	20949	19	40	HGSVC (Freeze 4)	PAV (Flye [UL-ONT])	UL-ONT	szro-50-200	all	0.475
HG00733	20	SV (INS)	20949	13	36	HGSVC (Freeze 4)	PAV (Flye [UL-ONT])	UL-ONT	szro-50-200	notr	0.361111
HG00733	20	SV (DEL)	100115	37	63	HGSVC (Freeze 4)	PAV (Flye [UL-ONT])	UL-ONT	szro-50-200	all	0.587302
HG00733	20	SV (DEL)	100115	35	62	HGSVC (Freeze 4)	PAV (Flye [UL-ONT])	UL-ONT	szro-50-200	notr	0.564516
HG00733	25	SV (INS)	48056	28	40	HGSVC (Freeze 4)	PAV (PGAS)	HiFi	szro-50-200	all	0.7
HG00733	25	SV (INS)	48056	22	36	HGSVC (Freeze 4)	PAV (PGAS)	HiFi	szro-50-200	notr	0.611111
HG00733	25	SV (DEL)	100115	47	63	HGSVC (Freeze 4)	PAV (PGAS)	HiFi	szro-50-200	all	0.746032
HG00733	25	SV (DEL)	100115	46	62	HGSVC (Freeze 4)	PAV (PGAS)	HiFi	szro-50-200	notr	0.741935
HG00733	25	SV (INS)	51666	30	40	HGSVC (Freeze 4)	PAV (hifiasm)	HiFi	szro-50-200	all	0.75
HG00733	25	SV (INS)	51666	23	36	HGSVC (Freeze 4)	PAV (hifiasm)	HiFi	szro-50-200	notr	0.638889
HG00733	25	SV (DEL)	100115	54	63	HGSVC (Freeze 4)	PAV (hifiasm)	HiFi	szro-50-200	all	0.857143
HG00733	25	SV (DEL)	100115	53	62	HGSVC (Freeze 4)	PAV (hifiasm)	HiFi	szro-50-200	notr	0.854839
HG00733	25	SV (INS)	48056	31	40	HGSVC (Freeze 4)	PAV (hifiasm-trio)	HiFi	szro-50-200	all	0.775
HG00733	25	SV (INS)	48056	24	36	HGSVC (Freeze 4)	PAV (hifiasm-trio)	HiFi	szro-50-200	notr	0.666667
HG00733	25	SV (DEL)	100115	49	63	HGSVC (Freeze 4)	PAV (hifiasm-trio)	HiFi	szro-50-200	all	0.777778
HG00733	25	SV (DEL)	100115	48	62	HGSVC (Freeze 4)	PAV (hifiasm-trio)	HiFi	szro-50-200	notr	0.774194
HG00733	25	SV (INS)	51666	32	40	HGSVC (Freeze 4)	svimASM (hifiasm-trio)	HiFi	szro-50-200	all	0.8
HG00733	25	SV (INS)	51666	28	36	HGSVC (Freeze 4)	svimASM (hifiasm-trio)	HiFi	szro-50-200	notr	0.777778
HG00733	25	SV (DEL)	100115	48	63	HGSVC (Freeze 4)	svimASM (hifiasm-trio)	HiFi	szro-50-200	all	0.761905
HG00733	25	SV (DEL)	100115	48	62	HGSVC (Freeze 4)	svimASM (hifiasm-trio)	HiFi	szro-50-200	notr	0.774194
HG00733	25	SV (INS)	51666	23	40	HGSVC (Freeze 4)	PAV (Flye [ONT])	ONT	szro-50-200	all	0.575
HG00733	25	SV (INS)	51666	19	36	HGSVC (Freeze 4)	PAV (Flye [ONT])	ONT	szro-50-200	notr	0.527778
HG00733	25	SV (DEL)	238803	35	63	HGSVC (Freeze 4)	PAV (Flye [ONT])	ONT	szro-50-200	all	0.555556
HG00733	25	SV (DEL)	238803	34	62	HGSVC (Freeze 4)	PAV (Flye [ONT])	ONT	szro-50-200	notr	0.548387
HG00733	25	SV (INS)	51666	25	40	HGSVC (Freeze 4)	PAV (Flye [UL-ONT])	UL-ONT	szro-50-200	all	0.625
HG00733	25	SV (INS)	51666	19	36	HGSVC (Freeze 4)	PAV (Flye [UL-ONT])	UL-ONT	szro-50-200	notr	0.527778
HG00733	25	SV (DEL)	45817	37	63	HGSVC (Freeze 4)	PAV (Flye [UL-ONT])	UL-ONT	szro-50-200	all	0.587302
HG00733	25	SV (DEL)	45817	36	62	HGSVC (Freeze 4)	PAV (Flye [UL-ONT])	UL-ONT	szro-50-200	notr	0.580645
HG00733	30	SV (INS)	51666	28	40	HGSVC (Freeze 4)	PAV (PGAS)	HiFi	szro-50-200	all	0.7
HG00733	30	SV (INS)	51666	21	36	HGSVC (Freeze 4)	PAV (PGAS)	HiFi	szro-50-200	notr	0.583333
HG00733	30	SV (DEL)	238803	53	63	HGSVC (Freeze 4)	PAV (PGAS)	HiFi	szro-50-200	all	0.84127
HG00733	30	SV (DEL)	238803	52	62	HGSVC (Freeze 4)	PAV (PGAS)	HiFi	szro-50-200	notr	0.83871
HG00733	30	SV (INS)	48056	19	40	HGSVC (Freeze 4)	PAV (hifiasm)	HiFi	szro-50-200	all	0.475
HG00733	30	SV (INS)	48056	14	36	HGSVC (Freeze 4)	PAV (hifiasm)	HiFi	szro-50-200	notr	0.388889
HG00733	30	SV (DEL)	100115	52	63	HGSVC (Freeze 4)	PAV (hifiasm)	HiFi	szro-50-200	all	0.825397
HG00733	30	SV (DEL)	100115	51	62	HGSVC (Freeze 4)	PAV (hifiasm)	HiFi	szro-50-200	notr	0.822581
HG00733	30	SV (INS)	51666	27	40	HGSVC (Freeze 4)	PAV (hifiasm-trio)	HiFi	szro-50-200	all	0.675
HG00733	30	SV (INS)	51666	22	36	HGSVC (Freeze 4)	PAV (hifiasm-trio)	HiFi	szro-50-200	notr	0.611111
HG00733	30	SV (DEL)	238803	54	63	HGSVC (Freeze 4)	PAV (hifiasm-trio)	HiFi	szro-50-200	all	0.857143
HG00733	30	SV (DEL)	238803	52	62	HGSVC (Freeze 4)	PAV (hifiasm-trio)	HiFi	szro-50-200	notr	0.83871
HG00733	30	SV (INS)	51666	33	40	HGSVC (Freeze 4)	svimASM (hifiasm-trio)	HiFi	szro-50-200	all	0.825
HG00733	30	SV (INS)	51666	28	36	HGSVC (Freeze 4)	svimASM (hifiasm-trio)	HiFi	szro-50-200	notr	0.777778
HG00733	30	SV (DEL)	100115	48	63	HGSVC (Freeze 4)	svimASM (hifiasm-trio)	HiFi	szro-50-200	all	0.761905
HG00733	30	SV (DEL)	100115	48	62	HGSVC (Freeze 4)	svimASM (hifiasm-trio)	HiFi	szro-50-200	notr	0.774194
HG00733	30	SV (INS)	27836	17	40	HGSVC (Freeze 4)	PAV (Flye [ONT])	ONT	szro-50-200	all	0.425
HG00733	30	SV (INS)	27836	13	36	HGSVC (Freeze 4)	PAV (Flye [ONT])	ONT	szro-50-200	notr	0.361111
HG00733	30	SV (DEL)	238803	38	63	HGSVC (Freeze 4)	PAV (Flye [ONT])	ONT	szro-50-200	all	0.603175
HG00733	30	SV (DEL)	238803	37	62	HGSVC (Freeze 4)	PAV (Flye [ONT])	ONT	szro-50-200	notr	0.596774
HG00733	30	SV (INS)	51666	18	40	HGSVC (Freeze 4)	PAV (Flye [UL-ONT])	UL-ONT	szro-50-200	all	0.45
HG00733	30	SV (INS)	51666	13	36	HGSVC (Freeze 4)	PAV (Flye [UL-ONT])	UL-ONT	szro-50-200	notr	0.361111
HG00733	30	SV (DEL)	100115	31	63	HGSVC (Freeze 4)	PAV (Flye [UL-ONT])	UL-ONT	szro-50-200	all	0.492063
HG00733	30	SV (DEL)	100115	30	62	HGSVC (Freeze 4)	PAV (Flye [UL-ONT])	UL-ONT	szro-50-200	notr	0.483871
HG002	5	SV (INS)	12597	4	41	HGSVC (Freeze 4)	PAV (PGAS)	HiFi	szro-50-200	all	0.097561
HG002	5	SV (INS)	12597	3	39	HGSVC (Freeze 4)	PAV (PGAS)	HiFi	szro-50-200	notr	0.0769231
HG002	5	SV (DEL)	37153	12	69	HGSVC (Freeze 4)	PAV (PGAS)	HiFi	szro-50-200	all	0.173913
HG002	5	SV (DEL)	37153	11	68	HGSVC (Freeze 4)	PAV (PGAS)	HiFi	szro-50-200	notr	0.161765
HG002	5	SV (INS)	12597	5	41	HGSVC (Freeze 4)	PAV (hifiasm)	HiFi	szro-50-200	all	0.121951
HG002	5	SV (INS)	12597	4	39	HGSVC (Freeze 4)	PAV (hifiasm)	HiFi	szro-50-200	notr	0.102564
HG002	5	SV (DEL)	32198	21	69	HGSVC (Freeze 4)	PAV (hifiasm)	HiFi	szro-50-200	all	0.304348
HG002	5	SV (DEL)	32198	19	68	HGSVC (Freeze 4)	PAV (hifiasm)	HiFi	szro-50-200	notr	0.279412
HG002	5	SV (INS)	12597	5	41	HGSVC (Freeze 4)	PAV (hifiasm-trio)	HiFi	szro-50-200	all	0.121951
HG002	5	SV (INS)	12597	4	39	HGSVC (Freeze 4)	PAV (hifiasm-trio)	HiFi	szro-50-200	notr	0.102564
HG002	5	SV (DEL)	32198	20	69	HGSVC (Freeze 4)	PAV (hifiasm-trio)	HiFi	szro-50-200	all	0.289855
HG002	5	SV (DEL)	32198	19	68	HGSVC (Freeze 4)	PAV (hifiasm-trio)	HiFi	szro-50-200	notr	0.279412
HG002	5	SV (INS)	20380	12	41	HGSVC (Freeze 4)	svimASM (hifiasm-trio)	HiFi	szro-50-200	all	0.292683
HG002	5	SV (INS)	20380	10	39	HGSVC (Freeze 4)	svimASM (hifiasm-trio)	HiFi	szro-50-200	notr	0.25641
HG002	5	SV (DEL)	55668	26	69	HGSVC (Freeze 4)	svimASM (hifiasm-trio)	HiFi	szro-50-200	all	0.376812
HG002	5	SV (DEL)	55668	25	68	HGSVC (Freeze 4)	svimASM (hifiasm-trio)	HiFi	szro-50-200	notr	0.367647
HG002	5	SV (INS)	47295	15	41	HGSVC (Freeze 4)	PAV (Flye [ONT])	ONT	szro-50-200	all	0.365854
HG002	5	SV (INS)	47295	12	39	HGSVC (Freeze 4)	PAV (Flye [ONT])	ONT	szro-50-200	notr	0.307692
HG002	5	SV (DEL)	114201	30	69	HGSVC (Freeze 4)	PAV (Flye [ONT])	ONT	szro-50-200	all	0.434783
HG002	5	SV (DEL)	114201	29	68	HGSVC (Freeze 4)	PAV (Flye [ONT])	ONT	szro-50-200	notr	0.426471
HG002	5	SV (INS)	47295	15	41	HGSVC (Freeze 4)	PAV (Flye [UL-ONT])	UL-ONT	szro-50-200	all	0.365854
HG002	5	SV (INS)	47295	13	39	HGSVC (Freeze 4)	PAV (Flye [UL-ONT])	UL-ONT	szro-50-200	notr	0.333333
HG002	5	SV (DEL)	84683	31	69	HGSVC (Freeze 4)	PAV (Flye [UL-ONT])	UL-ONT	szro-50-200	all	0.449275
HG002	5	SV (DEL)	84683	30	68	HGSVC (Freeze 4)	PAV (Flye [UL-ONT])	UL-ONT	szro-50-200	notr	0.441176
HG002	8	SV (INS)	20949	11	41	HGSVC (Freeze 4)	PAV (PGAS)	HiFi	szro-50-200	all	0.268293
HG002	8	SV (INS)	20949	10	39	HGSVC (Freeze 4)	PAV (PGAS)	HiFi	szro-50-200	notr	0.25641
HG002	8	SV (DEL)	117313	39	69	HGSVC (Freeze 4)	PAV (PGAS)	HiFi	szro-50-200	all	0.565217
HG002	8	SV (DEL)	117313	39	68	HGSVC (Freeze 4)	PAV (PGAS)	HiFi	szro-50-200	notr	0.573529
HG002	8	SV (INS)	21652	15	41	HGSVC (Freeze 4)	PAV (hifiasm)	HiFi	szro-50-200	all	0.365854
HG002	8	SV (INS)	21652	13	39	HGSVC (Freeze 4)	PAV (hifiasm)	HiFi	szro-50-200	notr	0.333333
HG002	8	SV (DEL)	117313	41	69	HGSVC (Freeze 4)	PAV (hifiasm)	HiFi	szro-50-200	all	0.594203
HG002	8	SV (DEL)	117313	39	68	HGSVC (Freeze 4)	PAV (hifiasm)	HiFi	szro-50-200	notr	0.573529
HG002	8	SV (INS)	24292	15	41	HGSVC (Freeze 4)	PAV (hifiasm-trio)	HiFi	szro-50-200	all	0.365854
HG002	8	SV (INS)	24292	13	39	HGSVC (Freeze 4)	PAV (hifiasm-trio)	HiFi	szro-50-200	notr	0.333333
HG002	8	SV (DEL)	117313	42	69	HGSVC (Freeze 4)	PAV (hifiasm-trio)	HiFi	szro-50-200	all	0.608696
HG002	8	SV (DEL)	117313	40	68	HGSVC (Freeze 4)	PAV (hifiasm-trio)	HiFi	szro-50-200	notr	0.588235
HG002	8	SV (INS)	47295	22	41	HGSVC (Freeze 4)	svimASM (hifiasm-trio)	HiFi	szro-50-200	all	0.536585
HG002	8	SV (INS)	47295	20	39	HGSVC (Freeze 4)	svimASM (hifiasm-trio)	HiFi	szro-50-200	notr	0.512821
HG002	8	SV (DEL)	84683	47	69	HGSVC (Freeze 4)	svimASM (hifiasm-trio)	HiFi	szro-50-200	all	0.681159
HG002	8	SV (DEL)	84683	46	68	HGSVC (Freeze 4)	svimASM (hifiasm-trio)	HiFi	szro-50-200	notr	0.676471
HG002	8	SV (INS)	47295	15	41	HGSVC (Freeze 4)	PAV (Flye [ONT])	ONT	szro-50-200	all	0.365854
HG002	8	SV (INS)	47295	13	39	HGSVC (Freeze 4)	PAV (Flye [ONT])	ONT	szro-50-200	notr	0.333333
HG002	8	SV (DEL)	114201	29	69	HGSVC (Freeze 4)	PAV (Flye [ONT])	ONT	szro-50-200	all	0.42029
HG002	8	SV (DEL)	114201	28	68	HGSVC (Freeze 4)	PAV (Flye [ONT])	ONT	szro-50-200	notr	0.411765
HG002	8	SV (INS)	47295	20	41	HGSVC (Freeze 4)	PAV (Flye [UL-ONT])	UL-ONT	szro-50-200	all	0.487805
HG002	8	SV (INS)	47295	17	39	HGSVC (Freeze 4)	PAV (Flye [UL-ONT])	UL-ONT	szro-50-200	notr	0.435897
HG002	8	SV (DEL)	102003	29	69	HGSVC (Freeze 4)	PAV (Flye [UL-ONT])	UL-ONT	szro-50-200	all	0.42029
HG002	8	SV (DEL)	47410	27	68	HGSVC (Freeze 4)	PAV (Flye [UL-ONT])	UL-ONT	szro-50-200	notr	0.397059
HG002	10	SV (INS)	47295	16	41	HGSVC (Freeze 4)	PAV (PGAS)	HiFi	szro-50-200	all	0.390244
HG002	10	SV (INS)	47295	14	39	HGSVC (Freeze 4)	PAV (PGAS)	HiFi	szro-50-200	notr	0.358974
HG002	10	SV (DEL)	102003	29	69	HGSVC (Freeze 4)	PAV (PGAS)	HiFi	szro-50-200	all	0.42029
HG002	10	SV (DEL)	102003	28	68	HGSVC (Freeze 4)	PAV (PGAS)	HiFi	szro-50-200	notr	0.411765
HG002	10	SV (INS)	20949	16	41	HGSVC (Freeze 4)	PAV (hifiasm)	HiFi	szro-50-200	all	0.390244
HG002	10	SV (INS)	20949	14	39	HGSVC (Freeze 4)	PAV (hifiasm)	HiFi	szro-50-200	notr	0.358974
HG002	10	SV (DEL)	102003	31	69	HGSVC (Freeze 4)	PAV (hifiasm)	HiFi	szro-50-200	all	0.449275
HG002	10	SV (DEL)	102003	30	68	HGSVC (Freeze 4)	PAV (hifiasm)	HiFi	szro-50-200	notr	0.441176
HG002	10	SV (INS)	21652	18	41	HGSVC (Freeze 4)	PAV (hifiasm-trio)	HiFi	szro-50-200	all	0.439024
HG002	10	SV (INS)	21652	16	39	HGSVC (Freeze 4)	PAV (hifiasm-trio)	HiFi	szro-50-200	notr	0.410256
HG002	10	SV (DEL)	102003	33	69	HGSVC (Freeze 4)	PAV (hifiasm-trio)	HiFi	szro-50-200	all	0.478261
HG002	10	SV (DEL)	102003	32	68	HGSVC (Freeze 4)	PAV (hifiasm-trio)	HiFi	szro-50-200	notr	0.470588
HG002	10	SV (INS)	51666	24	41	HGSVC (Freeze 4)	svimASM (hifiasm-trio)	HiFi	szro-50-200	all	0.585366
HG002	10	SV (INS)	51666	23	39	HGSVC (Freeze 4)	svimASM (hifiasm-trio)	HiFi	szro-50-200	notr	0.589744
HG002	10	SV (DEL)	55668	46	69	HGSVC (Freeze 4)	svimASM (hifiasm-trio)	HiFi	szro-50-200	all	0.666667
HG002	10	SV (DEL)	55668	45	68	HGSVC (Freeze 4)	svimASM (hifiasm-trio)	HiFi	szro-50-200	notr	0.661765
HG002	10	SV (INS)	27836	22	41	HGSVC (Freeze 4)	PAV (Flye [ONT])	ONT	szro-50-200	all	0.536585
HG002	10	SV (INS)	27836	18	39	HGSVC (Freeze 4)	PAV (Flye [ONT])	ONT	szro-50-200	notr	0.461538
HG002	10	SV (DEL)	102003	32	69	HGSVC (Freeze 4)	PAV (Flye [ONT])	ONT	szro-50-200	all	0.463768
HG002	10	SV (DEL)	102003	31	68	HGSVC (Freeze 4)	PAV (Flye [ONT])	ONT	szro-50-200	notr	0.455882
HG002	10	SV (INS)	24292	16	41	HGSVC (Freeze 4)	PAV (Flye [UL-ONT])	UL-ONT	szro-50-200	all	0.390244
HG002	10	SV (INS)	24292	13	39	HGSVC (Freeze 4)	PAV (Flye [UL-ONT])	UL-ONT	szro-50-200	notr	0.333333
HG002	10	SV (DEL)	102003	37	69	HGSVC (Freeze 4)	PAV (Flye [UL-ONT])	UL-ONT	szro-50-200	all	0.536232
HG002	10	SV (DEL)	102003	36	68	HGSVC (Freeze 4)	PAV (Flye [UL-ONT])	UL-ONT	szro-50-200	notr	0.529412
HG002	12	SV (INS)	51666	20	41	HGSVC (Freeze 4)	PAV (PGAS)	HiFi	szro-50-200	all	0.487805
HG002	12	SV (INS)	51666	18	39	HGSVC (Freeze 4)	PAV (PGAS)	HiFi	szro-50-200	notr	0.461538
HG002	12	SV (DEL)	114201	45	69	HGSVC (Freeze 4)	PAV (PGAS)	HiFi	szro-50-200	all	0.652174
HG002	12	SV (DEL)	114201	44	68	HGSVC (Freeze 4)	PAV (PGAS)	HiFi	szro-50-200	notr	0.647059
HG002	12	SV (INS)	51666	20	41	HGSVC (Freeze 4)	PAV (hifiasm)	HiFi	szro-50-200	all	0.487805
HG002	12	SV (INS)	51666	18	39	HGSVC (Freeze 4)	PAV (hifiasm)	HiFi	szro-50-200	notr	0.461538
HG002	12	SV (DEL)	114201	44	69	HGSVC (Freeze 4)	PAV (hifiasm)	HiFi	szro-50-200	all	0.637681
HG002	12	SV (DEL)	114201	43	68	HGSVC (Freeze 4)	PAV (hifiasm)	HiFi	szro-50-200	notr	0.632353
HG002	12	SV (INS)	51666	21	41	HGSVC (Freeze 4)	PAV (hifiasm-trio)	HiFi	szro-50-200	all	0.512195
HG002	12	SV (INS)	51666	19	39	HGSVC (Freeze 4)	PAV (hifiasm-trio)	HiFi	szro-50-200	notr	0.487179
HG002	12	SV (DEL)	114201	46	69	HGSVC (Freeze 4)	PAV (hifiasm-trio)	HiFi	szro-50-200	all	0.666667
HG002	12	SV (DEL)	114201	45	68	HGSVC (Freeze 4)	PAV (hifiasm-trio)	HiFi	szro-50-200	notr	0.661765
HG002	12	SV (INS)	51666	22	41	HGSVC (Freeze 4)	svimASM (hifiasm-trio)	HiFi	szro-50-200	all	0.536585
HG002	12	SV (INS)	51666	21	39	HGSVC (Freeze 4)	svimASM (hifiasm-trio)	HiFi	szro-50-200	notr	0.538462
HG002	12	SV (DEL)	76842	52	69	HGSVC (Freeze 4)	svimASM (hifiasm-trio)	HiFi	szro-50-200	all	0.753623
HG002	12	SV (DEL)	76842	51	68	HGSVC (Freeze 4)	svimASM (hifiasm-trio)	HiFi	szro-50-200	notr	0.75
HG002	12	SV (INS)	51666	20	41	HGSVC (Freeze 4)	PAV (Flye [ONT])	ONT	szro-50-200	all	0.487805
HG002	12	SV (INS)	51666	16	39	HGSVC (Freeze 4)	PAV (Flye [ONT])	ONT	szro-50-200	notr	0.410256
HG002	12	SV (DEL)	102003	34	69	HGSVC (Freeze 4)	PAV (Flye [ONT])	ONT	szro-50-200	all	0.492754
HG002	12	SV (DEL)	102003	33	68	HGSVC (Freeze 4)	PAV (Flye [ONT])	ONT	szro-50-200	notr	0.485294
HG002	12	SV (INS)	47295	16	41	HGSVC (Freeze 4)	PAV (Flye [UL-ONT])	UL-ONT	szro-50-200	all	0.390244
HG002	12	SV (INS)	47295	13	39	HGSVC (Freeze 4)	PAV (Flye [UL-ONT])	UL-ONT	szro-50-200	notr	0.333333
HG002	12	SV (DEL)	102003	36	69	HGSVC (Freeze 4)	PAV (Flye [UL-ONT])	UL-ONT	szro-50-200	all	0.521739
HG002	12	SV (DEL)	102003	35	68	HGSVC (Freeze 4)	PAV (Flye [UL-ONT])	UL-ONT	szro-50-200	notr	0.514706
HG002	15	SV (INS)	51666	25	41	HGSVC (Freeze 4)	PAV (PGAS)	HiFi	szro-50-200	all	0.609756
HG002	15	SV (INS)	51666	22	39	HGSVC (Freeze 4)	PAV (PGAS)	HiFi	szro-50-200	notr	0.564103
HG002	15	SV (DEL)	117313	57	69	HGSVC (Freeze 4)	PAV (PGAS)	HiFi	szro-50-200	all	0.826087
HG002	15	SV (DEL)	117313	56	68	HGSVC (Freeze 4)	PAV (PGAS)	HiFi	szro-50-200	notr	0.823529
HG002	15	SV (INS)	51666	24	41	HGSVC (Freeze 4)	PAV (hifiasm)	HiFi	szro-50-200	all	0.585366
HG002	15	SV (INS)	51666	19	39	HGSVC (Freeze 4)	PAV (hifiasm)	HiFi	szro-50-200	notr	0.487179
HG002	15	SV (DEL)	222915	58	69	HGSVC (Freeze 4)	PAV (hifiasm)	HiFi	szro-50-200	all	0.84058
HG002	15	SV (DEL)	222915	57	68	HGSVC (Freeze 4)	PAV (hifiasm)	HiFi	szro-50-200	notr	0.838235
HG002	15	SV (INS)	51666	25	41	HGSVC (Freeze 4)	PAV (hifiasm-trio)	HiFi	szro-50-200	all	0.609756
HG002	15	SV (INS)	51666	21	39	HGSVC (Freeze 4)	PAV (hifiasm-trio)	HiFi	szro-50-200	notr	0.538462
HG002	15	SV (DEL)	117313	59	69	HGSVC (Freeze 4)	PAV (hifiasm-trio)	HiFi	szro-50-200	all	0.855072
HG002	15	SV (DEL)	117313	58	68	HGSVC (Freeze 4)	PAV (hifiasm-trio)	HiFi	szro-50-200	notr	0.852941
HG002	15	SV (INS)	51666	28	41	HGSVC (Freeze 4)	svimASM (hifiasm-trio)	HiFi	szro-50-200	all	0.682927
HG002	15	SV (INS)	51666	25	39	HGSVC (Freeze 4)	svimASM (hifiasm-trio)	HiFi	szro-50-200	notr	0.641026
HG002	15	SV (DEL)	84683	57	69	HGSVC (Freeze 4)	svimASM (hifiasm-trio)	HiFi	szro-50-200	all	0.826087
HG002	15	SV (DEL)	84683	56	68	HGSVC (Freeze 4)	svimASM (hifiasm-trio)	HiFi	szro-50-200	notr	0.823529
HG002	15	SV (INS)	51666	18	41	HGSVC (Freeze 4)	PAV (Flye [ONT])	ONT	szro-50-200	all	0.439024
HG002	15	SV (INS)	51666	14	39	HGSVC (Freeze 4)	PAV (Flye [ONT])	ONT	szro-50-200	notr	0.358974
HG002	15	SV (DEL)	102003	26	69	HGSVC (Freeze 4)	PAV (Flye [ONT])	ONT	szro-50-200	all	0.376812
HG002	15	SV (DEL)	102003	25	68	HGSVC (Freeze 4)	PAV (Flye [ONT])	ONT	szro-50-200	notr	0.367647
HG002	15	SV (INS)	47295	18	41	HGSVC (Freeze 4)	PAV (Flye [UL-ONT])	UL-ONT	szro-50-200	all	0.439024
HG002	15	SV (INS)	47295	14	39	HGSVC (Freeze 4)	PAV (Flye [UL-ONT])	UL-ONT	szro-50-200	notr	0.358974
HG002	15	SV (DEL)	117313	41	69	HGSVC (Freeze 4)	PAV (Flye [UL-ONT])	UL-ONT	szro-50-200	all	0.594203
HG002	15	SV (DEL)	117313	39	68	HGSVC (Freeze 4)	PAV (Flye [UL-ONT])	UL-ONT	szro-50-200	notr	0.573529
HG002	17	SV (INS)	47295	25	41	HGSVC (Freeze 4)	PAV (PGAS)	HiFi	szro-50-200	all	0.609756
HG002	17	SV (INS)	47295	22	39	HGSVC (Freeze 4)	PAV (PGAS)	HiFi	szro-50-200	notr	0.564103
HG002	17	SV (DEL)	117313	57	69	HGSVC (Freeze 4)	PAV (PGAS)	HiFi	szro-50-200	all	0.826087
HG002	17	SV (DEL)	117313	56	68	HGSVC (Freeze 4)	PAV (PGAS)	HiFi	szro-50-200	notr	0.823529
HG002	17	SV (INS)	48056	26	41	HGSVC (Freeze 4)	PAV (hifiasm)	HiFi	szro-50-200	all	0.634146
HG002	17	SV (INS)	48056	24	39	HGSVC (Freeze 4)	PAV (hifiasm)	HiFi	szro-50-200	notr	0.615385
HG002	17	SV (DEL)	117313	57	69	HGSVC (Freeze 4)	PAV (hifiasm)	HiFi	szro-50-200	all	0.826087
HG002	17	SV (DEL)	117313	56	68	HGSVC (Freeze 4)	PAV (hifiasm)	HiFi	szro-50-200	notr	0.823529
HG002	17	SV (INS)	51666	26	41	HGSVC (Freeze 4)	PAV (hifiasm-trio)	HiFi	szro-50-200	all	0.634146
HG002	17	SV (INS)	51666	24	39	HGSVC (Freeze 4)	PAV (hifiasm-trio)	HiFi	szro-50-200	notr	0.615385
HG002	17	SV (DEL)	117313	60	69	HGSVC (Freeze 4)	PAV (hifiasm-trio)	HiFi	szro-50-200	all	0.869565
HG002	17	SV (DEL)	117313	59	68	HGSVC (Freeze 4)	PAV (hifiasm-trio)	HiFi	szro-50-200	notr	0.867647
HG002	17	SV (INS)	51666	30	41	HGSVC (Freeze 4)	svimASM (hifiasm-trio)	HiFi	szro-50-200	all	0.731707
HG002	17	SV (INS)	51666	26	39	HGSVC (Freeze 4)	svimASM (hifiasm-trio)	HiFi	szro-50-200	notr	0.666667
HG002	17	SV (DEL)	84683	54	69	HGSVC (Freeze 4)	svimASM (hifiasm-trio)	HiFi	szro-50-200	all	0.782609
HG002	17	SV (DEL)	84683	53	68	HGSVC (Freeze 4)	svimASM (hifiasm-trio)	HiFi	szro-50-200	notr	0.779412
HG002	17	SV (INS)	47295	25	41	HGSVC (Freeze 4)	PAV (Flye [ONT])	ONT	szro-50-200	all	0.609756
HG002	17	SV (INS)	47295	21	39	HGSVC (Freeze 4)	PAV (Flye [ONT])	ONT	szro-50-200	notr	0.538462
HG002	17	SV (DEL)	102003	35	69	HGSVC (Freeze 4)	PAV (Flye [ONT])	ONT	szro-50-200	all	0.507246
HG002	17	SV (DEL)	102003	34	68	HGSVC (Freeze 4)	PAV (Flye [ONT])	ONT	szro-50-200	notr	0.5
HG002	17	SV (INS)	24292	18	41	HGSVC (Freeze 4)	PAV (Flye [UL-ONT])	UL-ONT	szro-50-200	all	0.439024
HG002	17	SV (INS)	24292	16	39	HGSVC (Freeze 4)	PAV (Flye [UL-ONT])	UL-ONT	szro-50-200	notr	0.410256
HG002	17	SV (DEL)	102003	35	69	HGSVC (Freeze 4)	PAV (Flye [UL-ONT])	UL-ONT	szro-50-200	all	0.507246
HG002	17	SV (DEL)	84683	32	68	HGSVC (Freeze 4)	PAV (Flye [UL-ONT])	UL-ONT	szro-50-200	notr	0.470588
HG002	20	SV (INS)	51666	24	41	HGSVC (Freeze 4)	PAV (PGAS)	HiFi	szro-50-200	all	0.585366
HG002	20	SV (INS)	51666	20	39	HGSVC (Freeze 4)	PAV (PGAS)	HiFi	szro-50-200	notr	0.512821
HG002	20	SV (DEL)	117313	58	69	HGSVC (Freeze 4)	PAV (PGAS)	HiFi	szro-50-200	all	0.84058
HG002	20	SV (DEL)	117313	57	68	HGSVC (Freeze 4)	PAV (PGAS)	HiFi	szro-50-200	notr	0.838235
HG002	20	SV (INS)	51666	26	41	HGSVC (Freeze 4)	PAV (hifiasm)	HiFi	szro-50-200	all	0.634146
HG002	20	SV (INS)	51666	23	39	HGSVC (Freeze 4)	PAV (hifiasm)	HiFi	szro-50-200	notr	0.589744
HG002	20	SV (DEL)	117313	59	69	HGSVC (Freeze 4)	PAV (hifiasm)	HiFi	szro-50-200	all	0.855072
HG002	20	SV (DEL)	117313	58	68	HGSVC (Freeze 4)	PAV (hifiasm)	HiFi	szro-50-200	notr	0.852941
HG002	20	SV (INS)	51666	27	41	HGSVC (Freeze 4)	PAV (hifiasm-trio)	HiFi	szro-50-200	all	0.658537
HG002	20	SV (INS)	51666	23	39	HGSVC (Freeze 4)	PAV (hifiasm-trio)	HiFi	szro-50-200	notr	0.589744
HG002	20	SV (DEL)	117313	59	69	HGSVC (Freeze 4)	PAV (hifiasm-trio)	HiFi	szro-50-200	all	0.855072
HG002	20	SV (DEL)	117313	58	68	HGSVC (Freeze 4)	PAV (hifiasm-trio)	HiFi	szro-50-200	notr	0.852941
HG002	20	SV (INS)	51666	27	41	HGSVC (Freeze 4)	svimASM (hifiasm-trio)	HiFi	szro-50-200	all	0.658537
HG002	20	SV (INS)	51666	25	39	HGSVC (Freeze 4)	svimASM (hifiasm-trio)	HiFi	szro-50-200	notr	0.641026
HG002	20	SV (DEL)	84683	55	69	HGSVC (Freeze 4)	svimASM (hifiasm-trio)	HiFi	szro-50-200	all	0.797101
HG002	20	SV (DEL)	84683	54	68	HGSVC (Freeze 4)	svimASM (hifiasm-trio)	HiFi	szro-50-200	notr	0.794118
HG002	20	SV (INS)	47295	20	41	HGSVC (Freeze 4)	PAV (Flye [ONT])	ONT	szro-50-200	all	0.487805
HG002	20	SV (INS)	47295	17	39	HGSVC (Freeze 4)	PAV (Flye [ONT])	ONT	szro-50-200	notr	0.435897
HG002	20	SV (DEL)	76842	34	69	HGSVC (Freeze 4)	PAV (Flye [ONT])	ONT	szro-50-200	all	0.492754
HG002	20	SV (DEL)	76842	33	68	HGSVC (Freeze 4)	PAV (Flye [ONT])	ONT	szro-50-200	notr	0.485294
HG002	20	SV (INS)	27836	17	41	HGSVC (Freeze 4)	PAV (Flye [UL-ONT])	UL-ONT	szro-50-200	all	0.414634
HG002	20	SV (INS)	27836	14	39	HGSVC (Freeze 4)	PAV (Flye [UL-ONT])	UL-ONT	szro-50-200	notr	0.358974
HG002	20	SV (DEL)	102003	36	69	HGSVC (Freeze 4)	PAV (Flye [UL-ONT])	UL-ONT	szro-50-200	all	0.521739
HG002	20	SV (DEL)	102003	34	68	HGSVC (Freeze 4)	PAV (Flye [UL-ONT])	UL-ONT	szro-50-200	notr	0.5
HG002	25	SV (INS)	51666	24	41	HGSVC (Freeze 4)	PAV (PGAS)	HiFi	szro-50-200	all	0.585366
HG002	25	SV (INS)	51666	20	39	HGSVC (Freeze 4)	PAV (PGAS)	HiFi	szro-50-200	notr	0.512821
HG002	25	SV (DEL)	117313	58	69	HGSVC (Freeze 4)	PAV (PGAS)	HiFi	szro-50-200	all	0.84058
HG002	25	SV (DEL)	117313	57	68	HGSVC (Freeze 4)	PAV (PGAS)	HiFi	szro-50-200	notr	0.838235
HG002	25	SV (INS)	48056	24	41	HGSVC (Freeze 4)	PAV (hifiasm)	HiFi	szro-50-200	all	0.585366
HG002	25	SV (INS)	48056	20	39	HGSVC (Freeze 4)	PAV (hifiasm)	HiFi	szro-50-200	notr	0.512821
HG002	25	SV (DEL)	114201	57	69	HGSVC (Freeze 4)	PAV (hifiasm)	HiFi	szro-50-200	all	0.826087
HG002	25	SV (DEL)	114201	56	68	HGSVC (Freeze 4)	PAV (hifiasm)	HiFi	szro-50-200	notr	0.823529
HG002	25	SV (INS)	51666	22	41	HGSVC (Freeze 4)	PAV (hifiasm-trio)	HiFi	szro-50-200	all	0.536585
HG002	25	SV (INS)	51666	18	39	HGSVC (Freeze 4)	PAV (hifiasm-trio)	HiFi	szro-50-200	notr	0.461538
HG002	25	SV (DEL)	117313	60	69	HGSVC (Freeze 4)	PAV (hifiasm-trio)	HiFi	szro-50-200	all	0.869565
HG002	25	SV (DEL)	117313	59	68	HGSVC (Freeze 4)	PAV (hifiasm-trio)	HiFi	szro-50-200	notr	0.867647
HG002	25	SV (INS)	51666	30	41	HGSVC (Freeze 4)	svimASM (hifiasm-trio)	HiFi	szro-50-200	all	0.731707
HG002	25	SV (INS)	51666	26	39	HGSVC (Freeze 4)	svimASM (hifiasm-trio)	HiFi	szro-50-200	notr	0.666667
HG002	25	SV (DEL)	84683	56	69	HGSVC (Freeze 4)	svimASM (hifiasm-trio)	HiFi	szro-50-200	all	0.811594
HG002	25	SV (DEL)	84683	55	68	HGSVC (Freeze 4)	svimASM (hifiasm-trio)	HiFi	szro-50-200	notr	0.808824
HG002	25	SV (INS)	47295	18	41	HGSVC (Freeze 4)	PAV (Flye [ONT])	ONT	szro-50-200	all	0.439024
HG002	25	SV (INS)	47295	15	39	HGSVC (Freeze 4)	PAV (Flye [ONT])	ONT	szro-50-200	notr	0.384615
HG002	25	SV (DEL)	102003	31	69	HGSVC (Freeze 4)	PAV (Flye [ONT])	ONT	szro-50-200	all	0.449275
HG002	25	SV (DEL)	102003	30	68	HGSVC (Freeze 4)	PAV (Flye [ONT])	ONT	szro-50-200	notr	0.441176
HG002	25	SV (INS)	47295	17	41	HGSVC (Freeze 4)	PAV (Flye [UL-ONT])	UL-ONT	szro-50-200	all	0.414634
HG002	25	SV (INS)	47295	14	39	HGSVC (Freeze 4)	PAV (Flye [UL-ONT])	UL-ONT	szro-50-200	notr	0.358974
HG002	25	SV (DEL)	102003	33	69	HGSVC (Freeze 4)	PAV (Flye [UL-ONT])	UL-ONT	szro-50-200	all	0.478261
HG002	25	SV (DEL)	102003	31	68	HGSVC (Freeze 4)	PAV (Flye [UL-ONT])	UL-ONT	szro-50-200	notr	0.455882
HG002	30	SV (INS)	51666	28	41	HGSVC (Freeze 4)	PAV (PGAS)	HiFi	szro-50-200	all	0.682927
HG002	30	SV (INS)	51666	24	39	HGSVC (Freeze 4)	PAV (PGAS)	HiFi	szro-50-200	notr	0.615385
HG002	30	SV (DEL)	222915	60	69	HGSVC (Freeze 4)	PAV (PGAS)	HiFi	szro-50-200	all	0.869565
HG002	30	SV (DEL)	222915	59	68	HGSVC (Freeze 4)	PAV (PGAS)	HiFi	szro-50-200	notr	0.867647
HG002	30	SV (INS)	51666	26	41	HGSVC (Freeze 4)	PAV (hifiasm)	HiFi	szro-50-200	all	0.634146
HG002	30	SV (INS)	51666	23	39	HGSVC (Freeze 4)	PAV (hifiasm)	HiFi	szro-50-200	notr	0.589744
HG002	30	SV (DEL)	117313	57	69	HGSVC (Freeze 4)	PAV (hifiasm)	HiFi	szro-50-200	all	0.826087
HG002	30	SV (DEL)	117313	56	68	HGSVC (Freeze 4)	PAV (hifiasm)	HiFi	szro-50-200	notr	0.823529
HG002	30	SV (INS)	51666	30	41	HGSVC (Freeze 4)	PAV (hifiasm-trio)	HiFi	szro-50-200	all	0.731707
HG002	30	SV (INS)	51666	26	39	HGSVC (Freeze 4)	PAV (hifiasm-trio)	HiFi	szro-50-200	notr	0.666667
HG002	30	SV (DEL)	222915	61	69	HGSVC (Freeze 4)	PAV (hifiasm-trio)	HiFi	szro-50-200	all	0.884058
HG002	30	SV (DEL)	222915	60	68	HGSVC (Freeze 4)	PAV (hifiasm-trio)	HiFi	szro-50-200	notr	0.882353
HG002	30	SV (INS)	51666	31	41	HGSVC (Freeze 4)	svimASM (hifiasm-trio)	HiFi	szro-50-200	all	0.756098
HG002	30	SV (INS)	51666	26	39	HGSVC (Freeze 4)	svimASM (hifiasm-trio)	HiFi	szro-50-200	notr	0.666667
HG002	30	SV (DEL)	84683	56	69	HGSVC (Freeze 4)	svimASM (hifiasm-trio)	HiFi	szro-50-200	all	0.811594
HG002	30	SV (DEL)	84683	55	68	HGSVC (Freeze 4)	svimASM (hifiasm-trio)	HiFi	szro-50-200	notr	0.808824
HG002	30	SV (INS)	21652	17	41	HGSVC (Freeze 4)	PAV (Flye [ONT])	ONT	szro-50-200	all	0.414634
HG002	30	SV (INS)	21652	14	39	HGSVC (Freeze 4)	PAV (Flye [ONT])	ONT	szro-50-200	notr	0.358974
HG002	30	SV (DEL)	102003	33	69	HGSVC (Freeze 4)	PAV (Flye [ONT])	ONT	szro-50-200	all	0.478261
HG002	30	SV (DEL)	102003	32	68	HGSVC (Freeze 4)	PAV (Flye [ONT])	ONT	szro-50-200	notr	0.470588
HG002	30	SV (INS)	51666	19	41	HGSVC (Freeze 4)	PAV (Flye [UL-ONT])	UL-ONT	szro-50-200	all	0.463415
HG002	30	SV (INS)	51666	15	39	HGSVC (Freeze 4)	PAV (Flye [UL-ONT])	UL-ONT	szro-50-200	notr	0.384615
HG002	30	SV (DEL)	102003	30	69	HGSVC (Freeze 4)	PAV (Flye [UL-ONT])	UL-ONT	szro-50-200	all	0.434783
HG002	30	SV (DEL)	102003	29	68	HGSVC (Freeze 4)	PAV (Flye [UL-ONT])	UL-ONT	szro-50-200	notr	0.426471
