# Supplementary material for: Whole-genome long-read sequencing downsampling and its effect on variant-calling precision and recall
Source: HighWire-hosted journal article supplement (doi:10.1101/gr.278070.123), 2023-12-01
Supplement: Supplemental_Figure_S1.pdf [file Supplemental_Figure_S1.pdf]

# Downsampling Outline

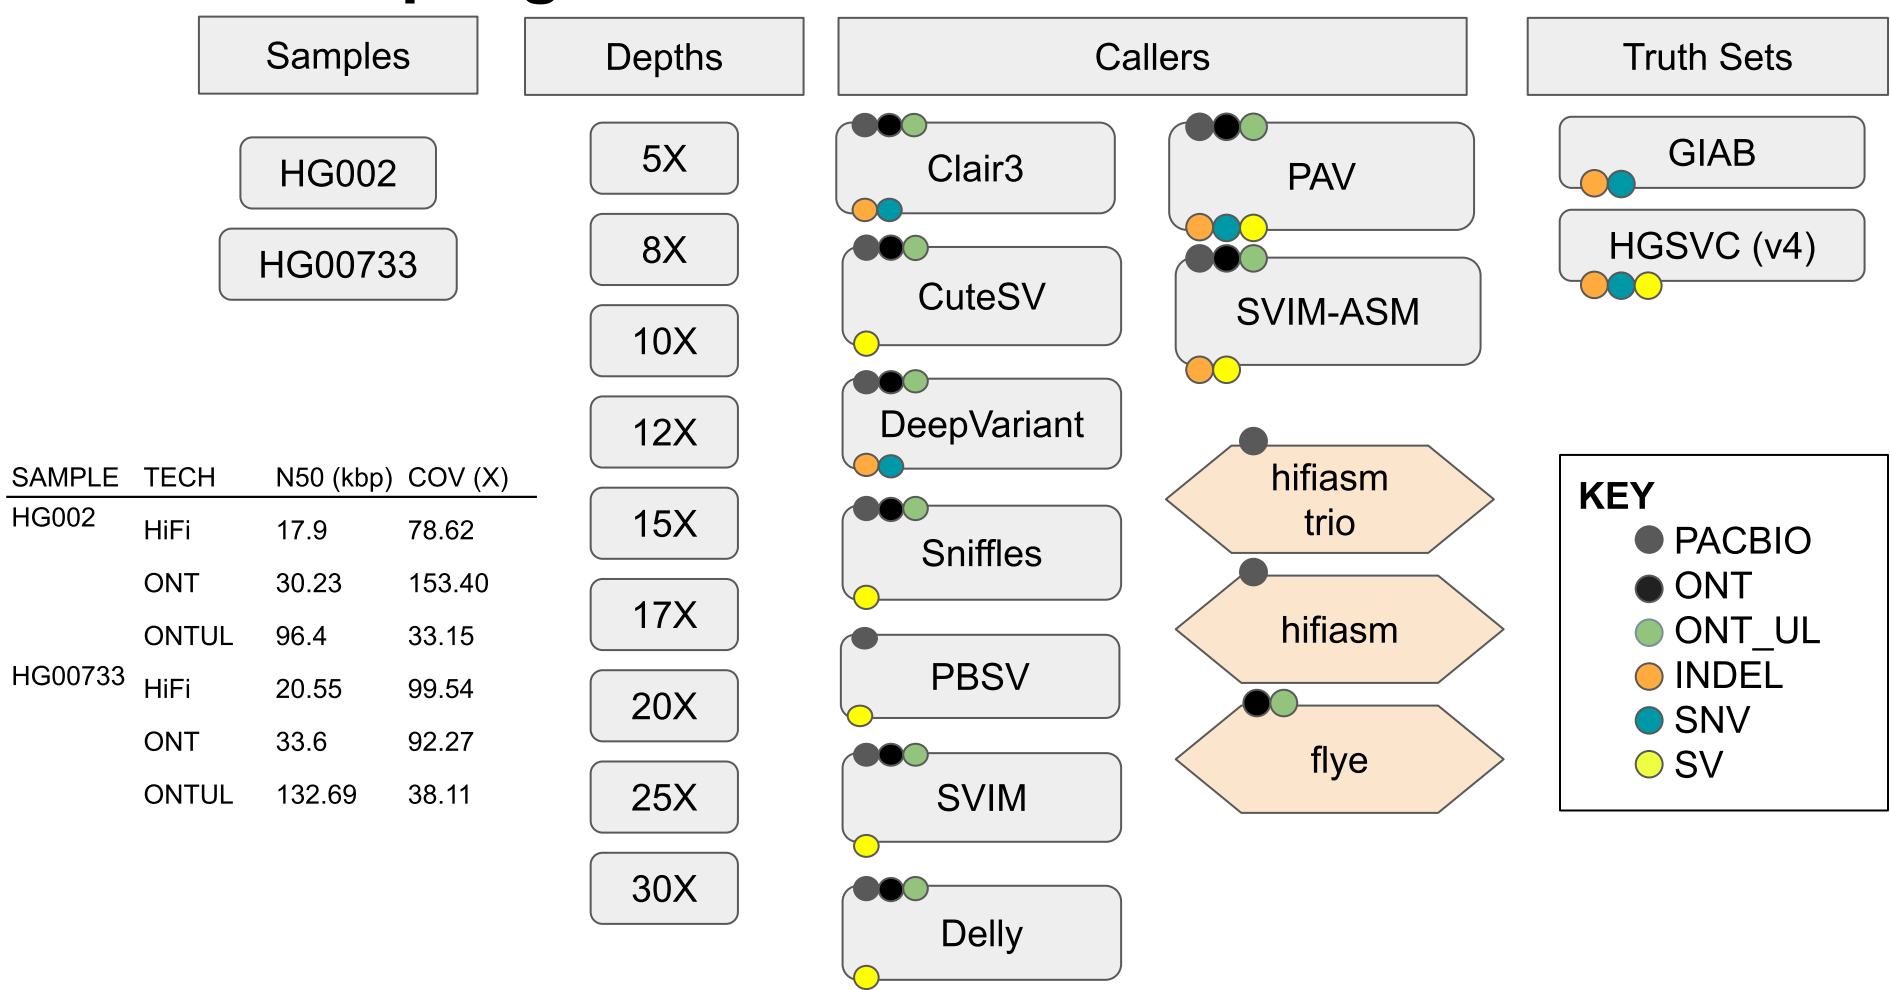

**Figure S1. Experimental overview.** Visual representation of experimental design. We used eight different variant callers for read-based methods: Clair3 [v0.1-r11] (SNV, indel), cuteSV [v1.0.13] (SV), DeepVariant [v1.3.0] (SNV, indel), Delly [v1.0.3] (SV), PEPPER-Margin-DeepVariant [r0.8] (SNV, indel), Sniffles [v2.0.2] (SV), PBSV [v2.8.0] (SV), and SVIM [v1.4.2] (SV), and two assembly-based callers: PAV [v1.2.2] (SNV, indel, SV) and SVIM-asm [v1.0.2] (SV). Every caller, except PBSV (HiFi only) can be used with each of the input sequencing technologies.
