# Supplementary material for: Whole-genome long-read sequencing downsampling and its effect on variant-calling precision and recall
Source: HighWire-hosted journal article supplement (doi:10.1101/gr.278070.123), 2023-12-01
Supplement: Supplemental_Figure_S2.pdf [file Supplemental_Figure_S2.pdf]

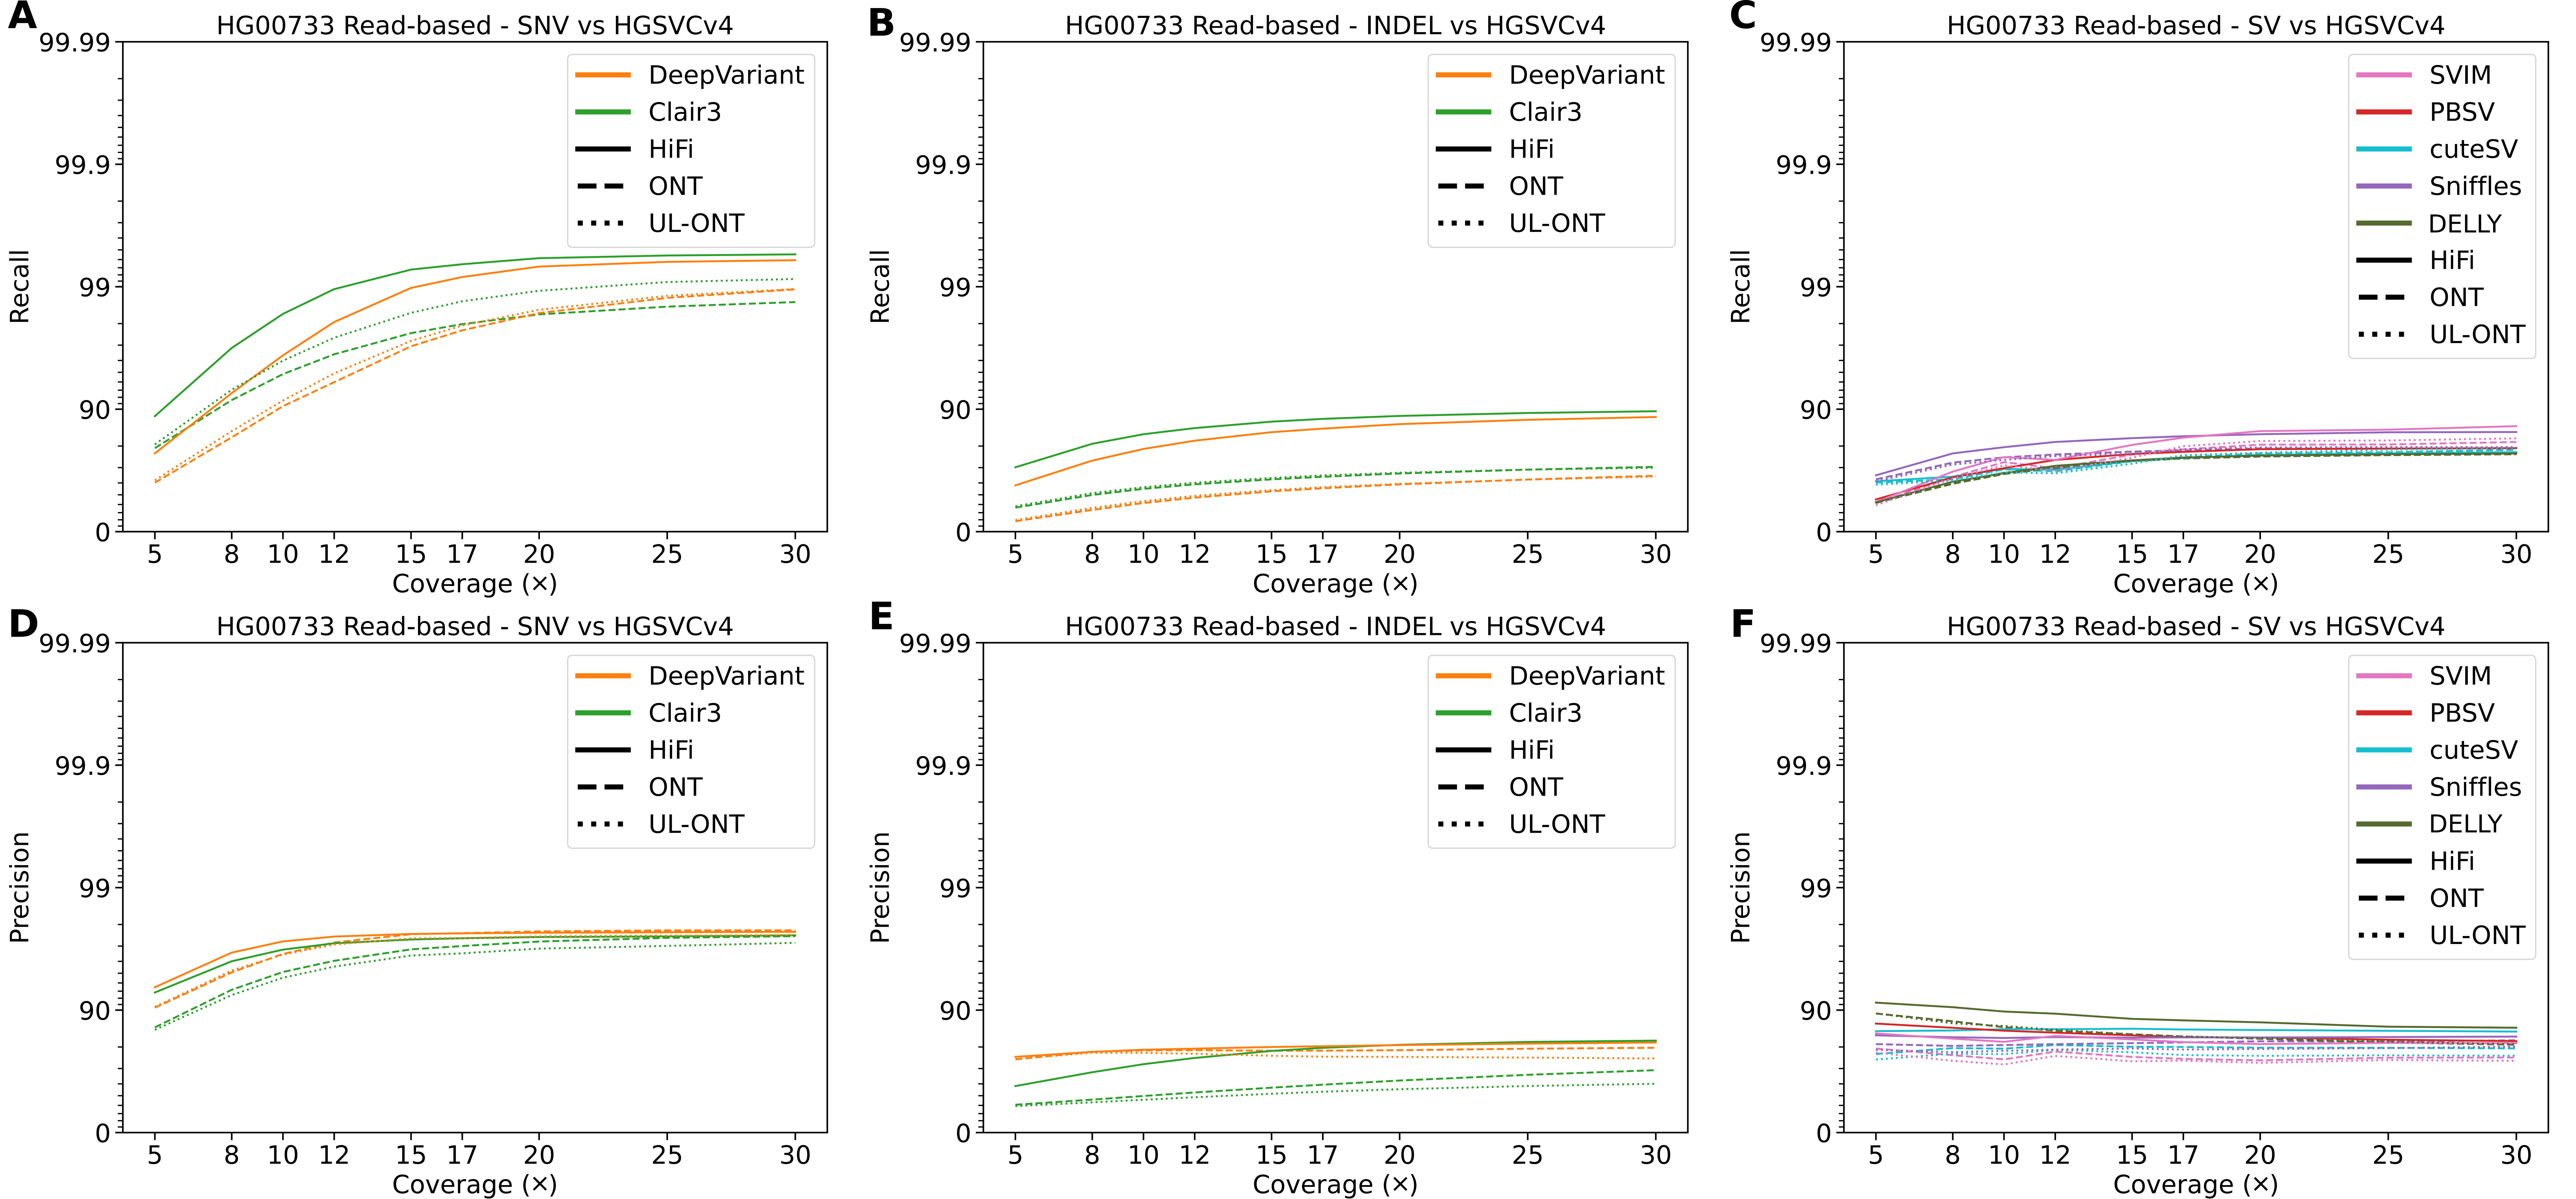

**Figure S2. Precision and recall for variant classes as a function of LRS coverage using read-based algorithms for HG00733.** **A)** Recall of genome sample HG00733 against HGSVC truth sets plotted against sequencing coverage for read-based callers: Clair3 and DeepVariant. Clair3 with PacBio HiFi reaches the earliest recall plateau, while all callers show saturation by 20x. **B)** Recall against HGSVC truth sets plotted against sequencing coverage for read-based callers across all algorithms capable of calling indels. Recall of both Clair3 and DeepVariant HiFi sets outperform their ONT counterparts. **C)** Recall against HGSVC truth sets plotted against sequencing coverage for read-based callers across all algorithms capable of calling SVs. **D)** Precision as a function of sequence coverage. SNV precision remains flat beyond 10x, demonstrating the ability of callers to distinguish sequencing error from true SNVs. **E)** Precision plotted against sequencing coverage for read-based callers across all algorithms capable of calling indels. Precision values for all technologies and coverages remain flat, but here the increased precision of ONT callers is demonstrated. **F)** Precision plotted against sequencing coverage for read-based callers across all algorithms capable of calling SVs.
