# Supplementary material for: Whole-genome long-read sequencing downsampling and its effect on variant-calling precision and recall
Source: HighWire-hosted journal article supplement (doi:10.1101/gr.278070.123), 2023-12-01
Supplement: Supplemental_Figure_S3.pdf [file Supplemental_Figure_S3.pdf]

**A**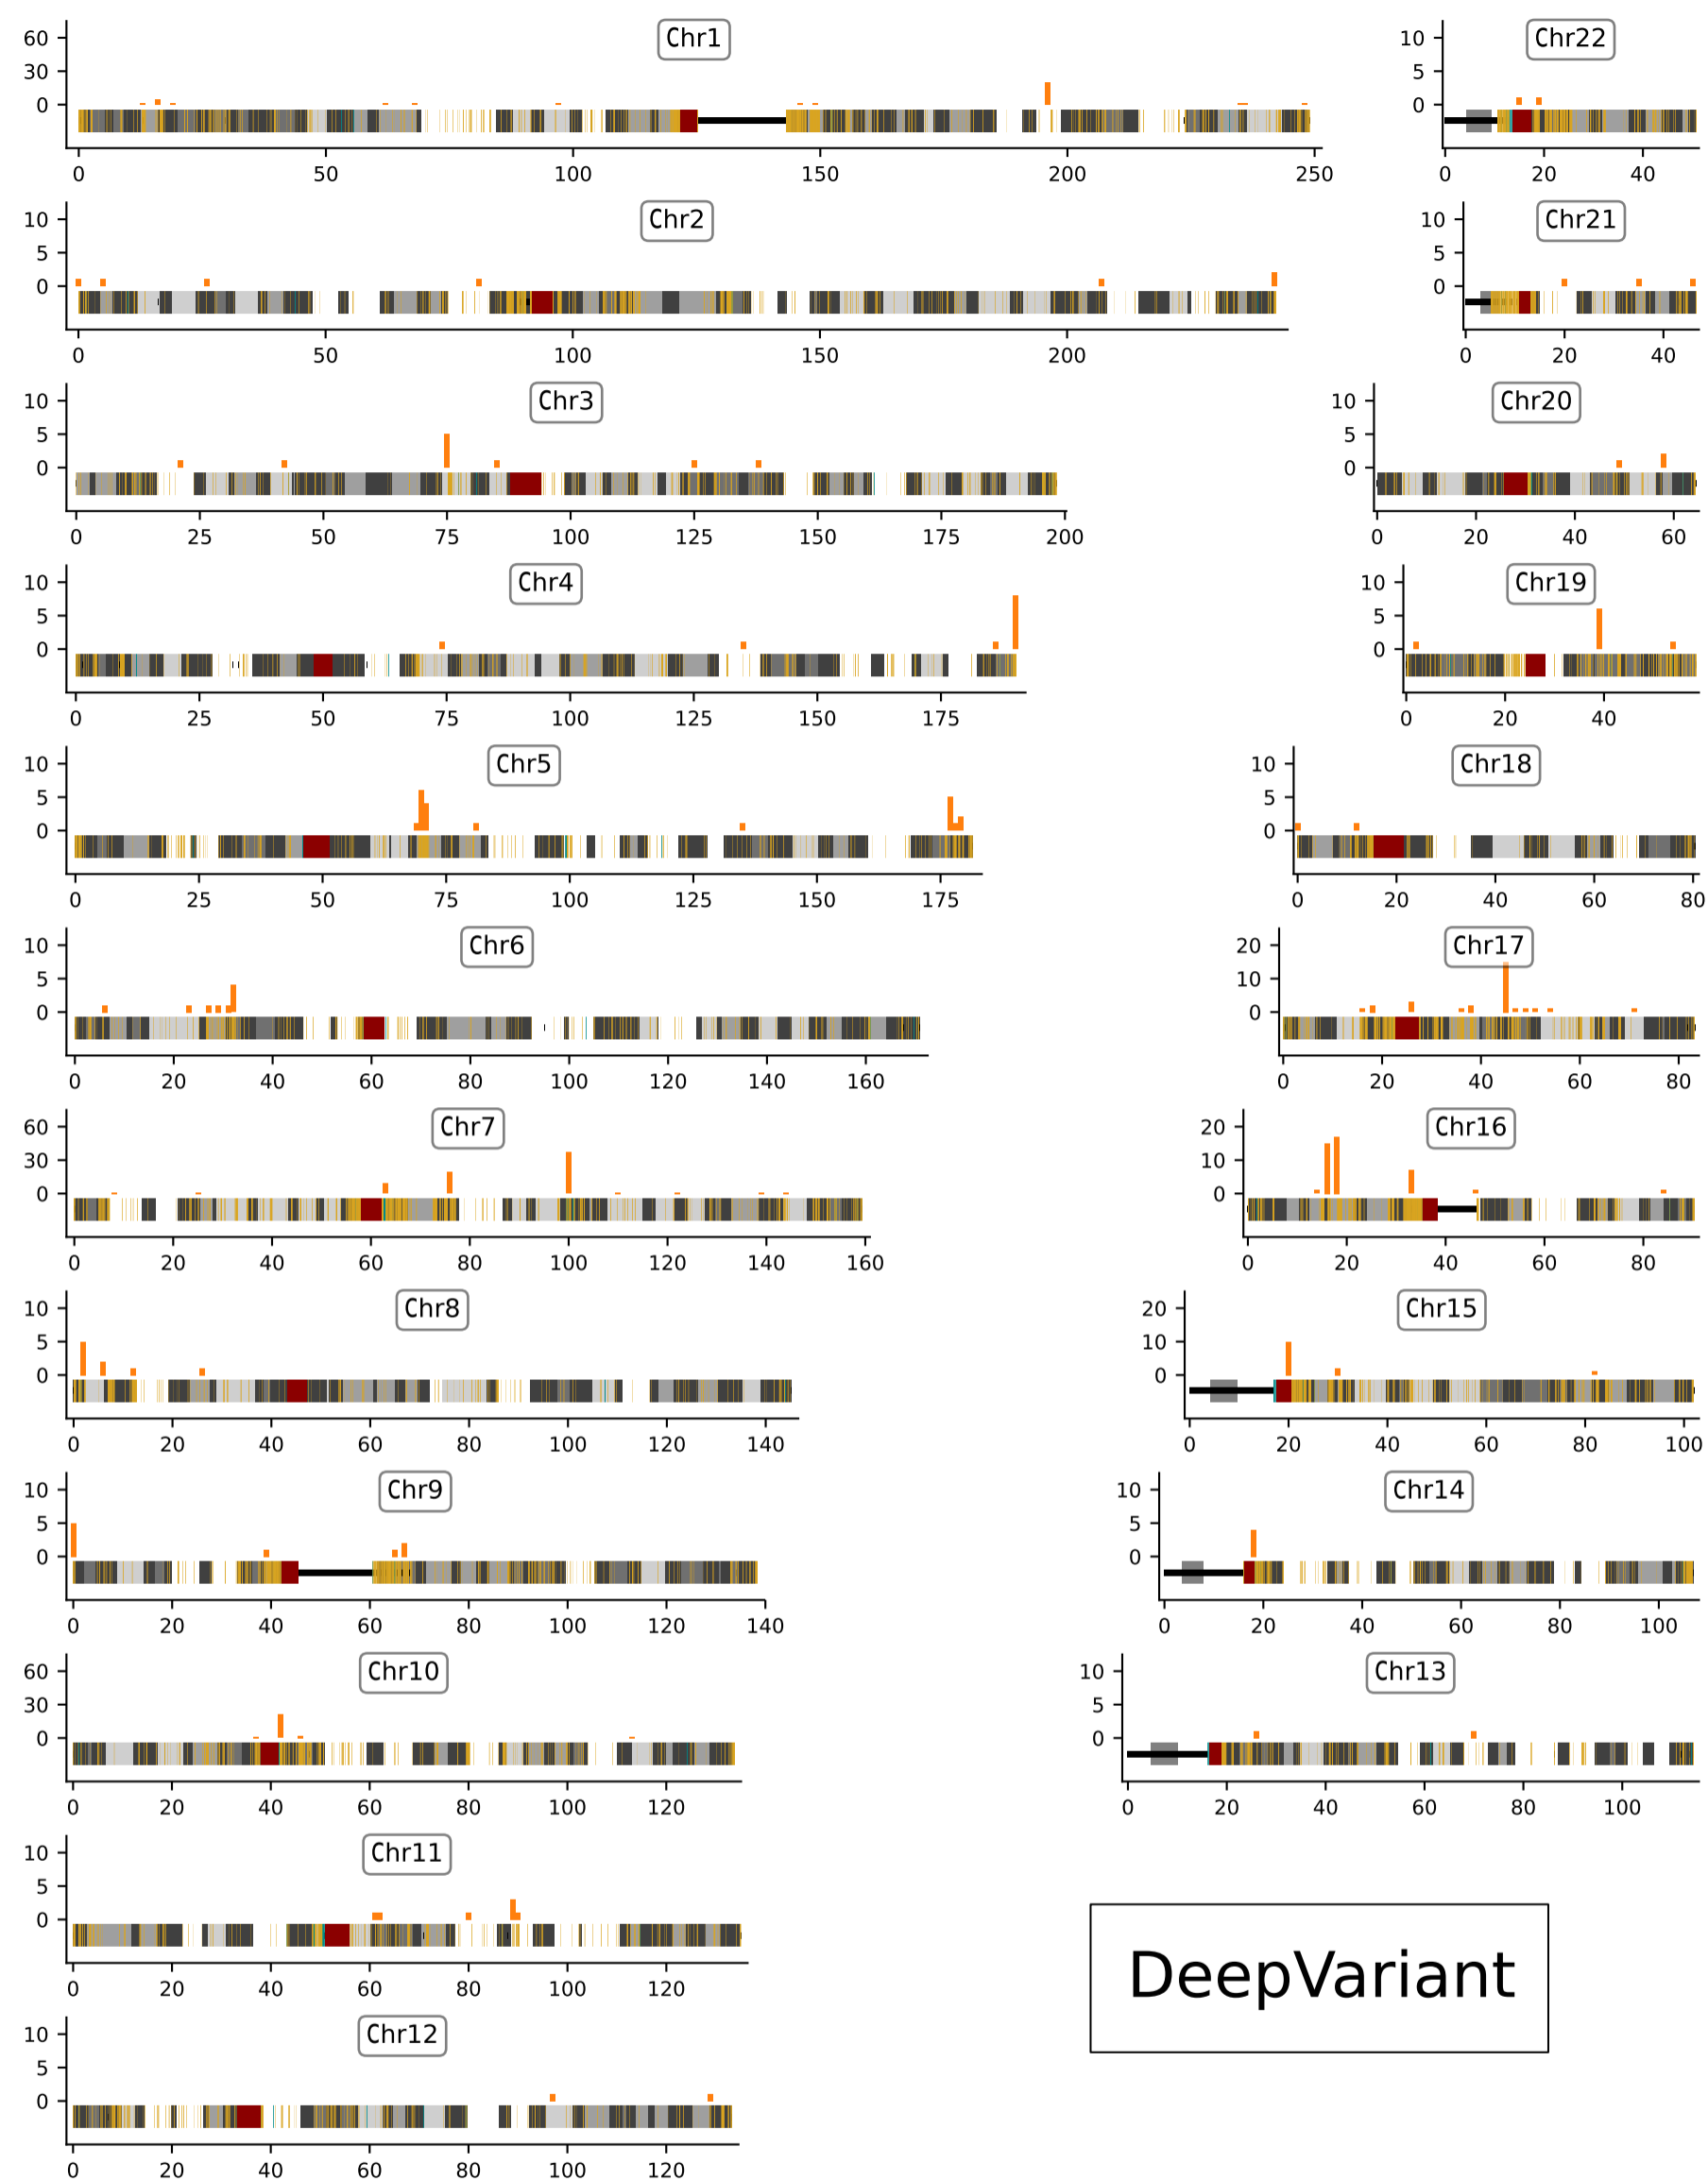**B**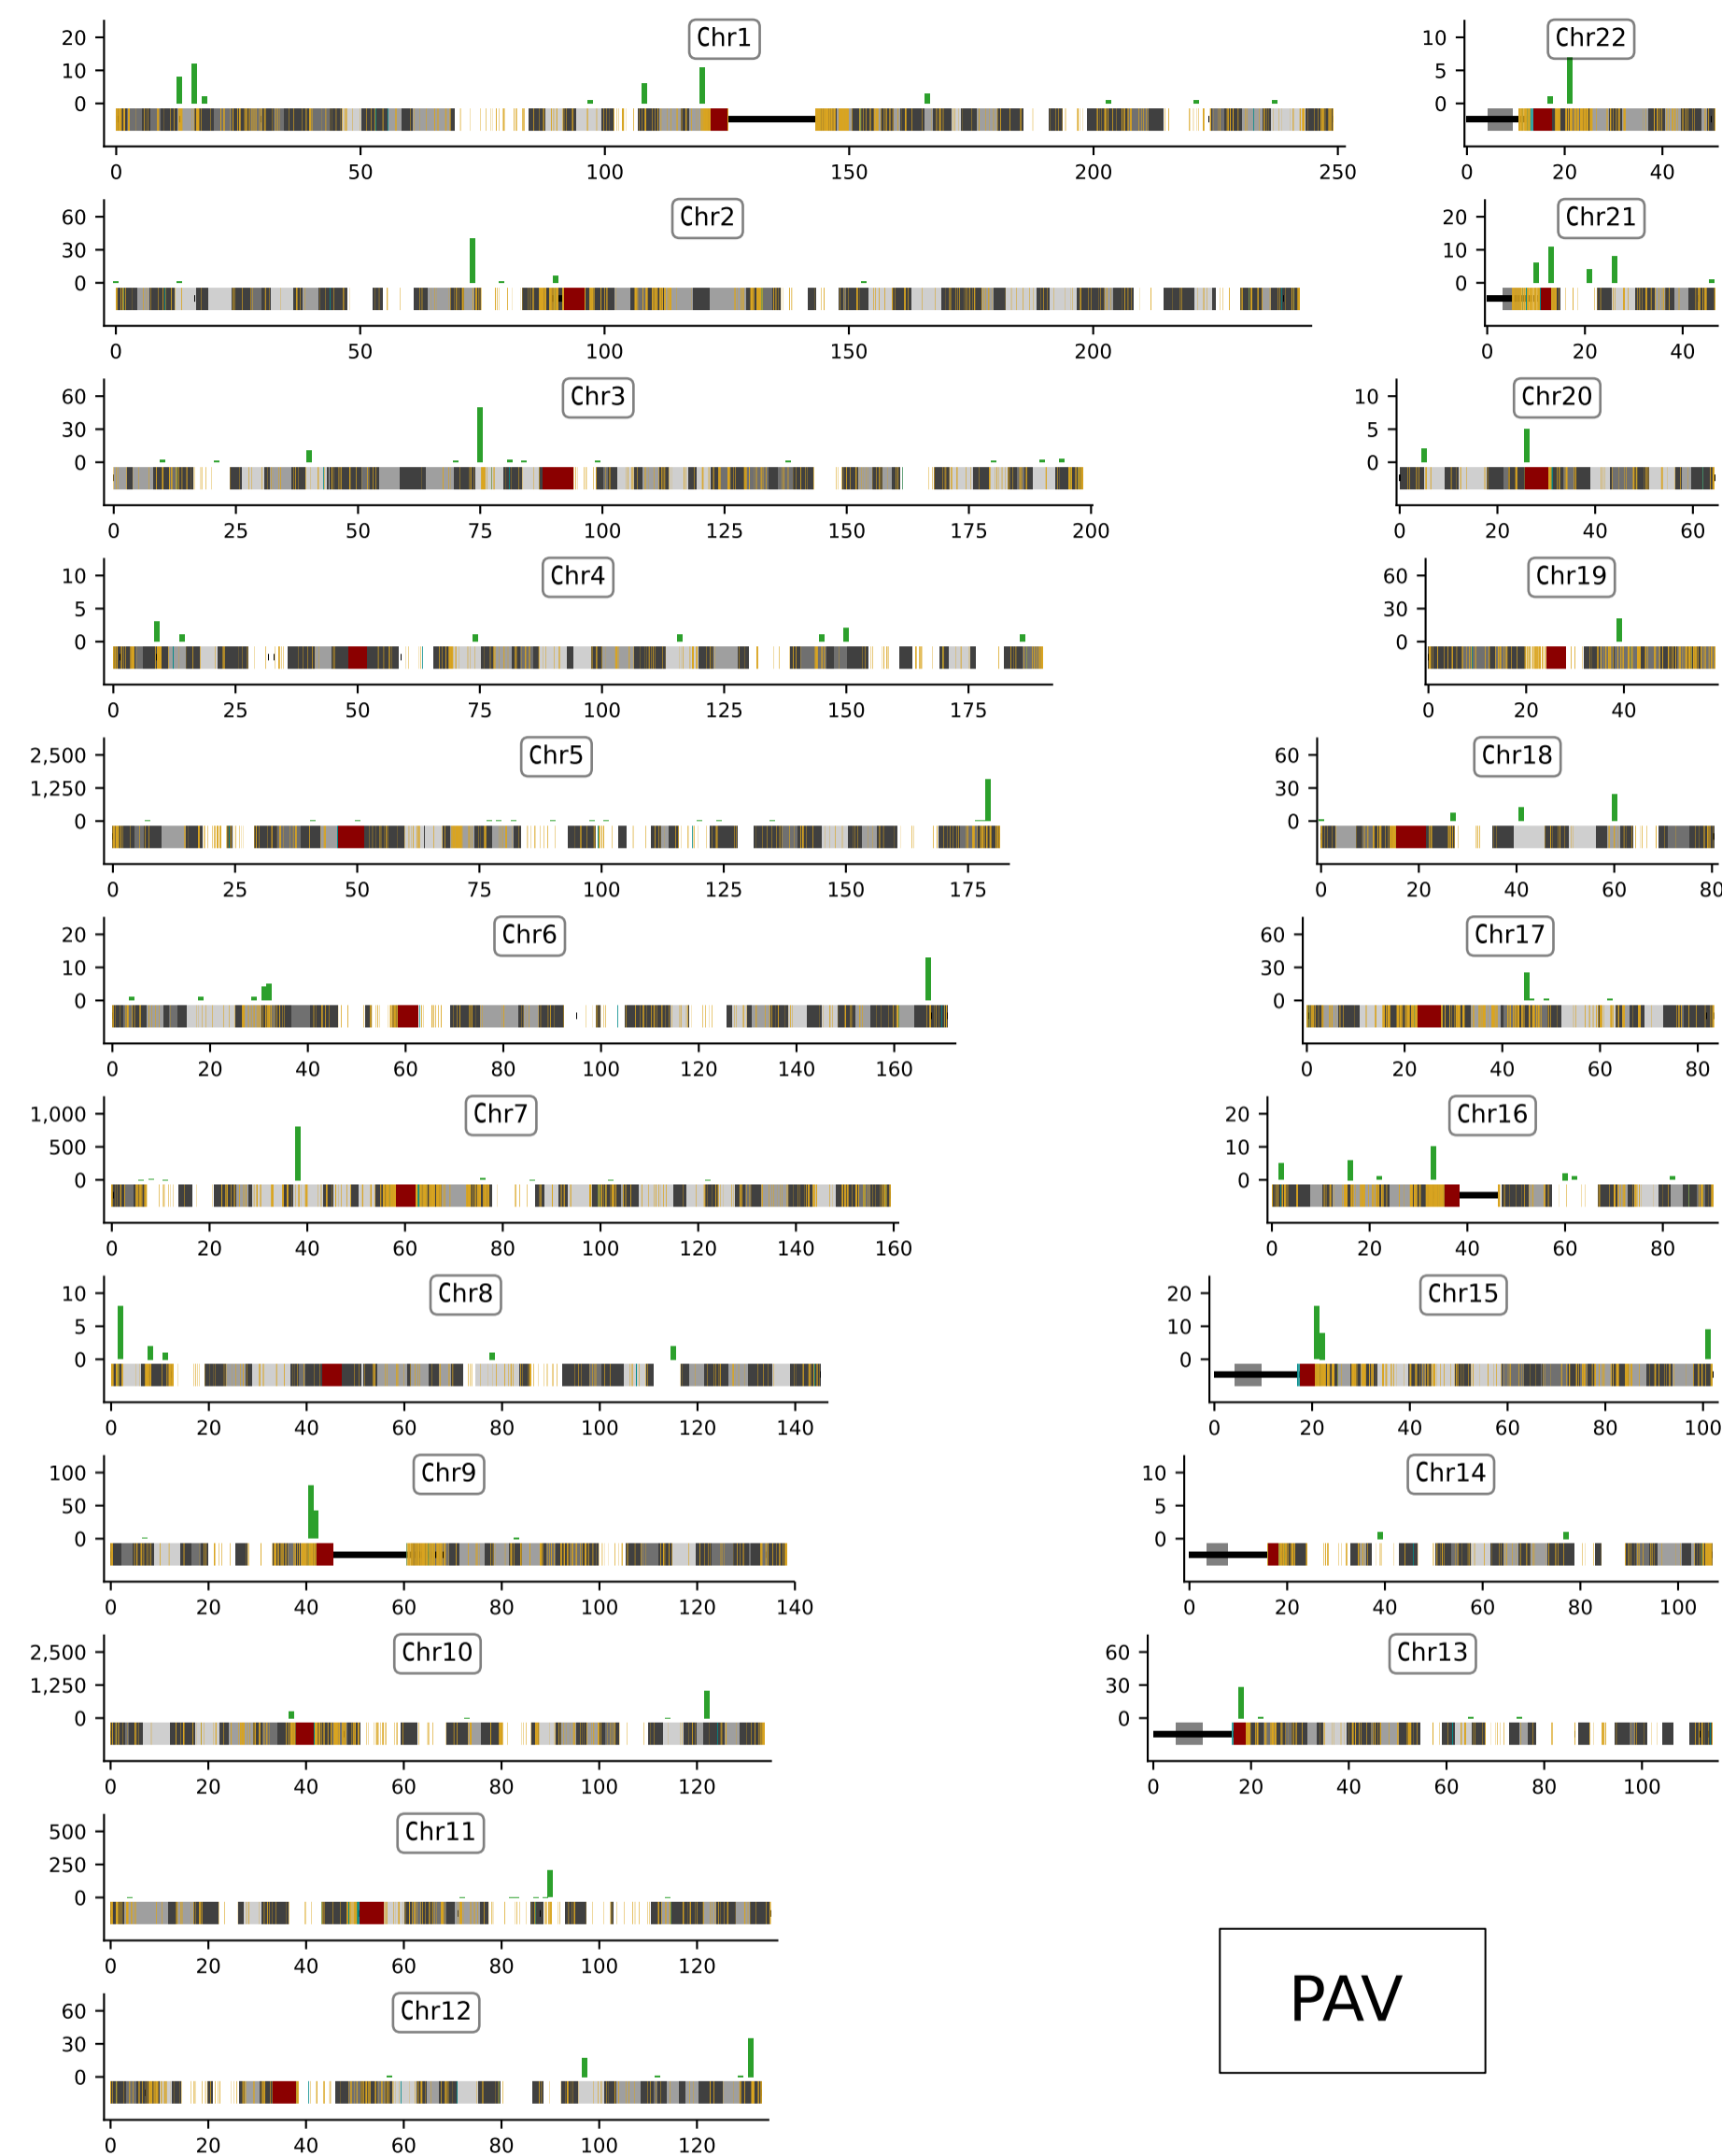

**Figure S3. Distribution of SNVs found exclusively in HG002 30× datasets compared to the GIAB truth set. A)** Ideogram overlaid with the count of SNVs exclusive to the HG002 30× analysis called from DeepVariant when compared to GIAB. Our analysis reveals that 2.46% (324/13,147) of the events not seen in GIAB are confirmed across all callers and technologies. **B)** Ideogram overlaid with the count of SNVs exclusive to the HG002 30× analysis called from PAV (hifiasm-trio) when compared to GIAB. Significant clusters exist over segmental duplications, within tandem repeats, and inside of subtelomeric repeats.
