# Supplementary material for: Whole-genome long-read sequencing downsampling and its effect on variant-calling precision and recall
Source: HighWire-hosted journal article supplement (doi:10.1101/gr.278070.123), 2023-12-01
Supplement: Supplemental_Figure_S4.pdf [file Supplemental_Figure_S4.pdf]

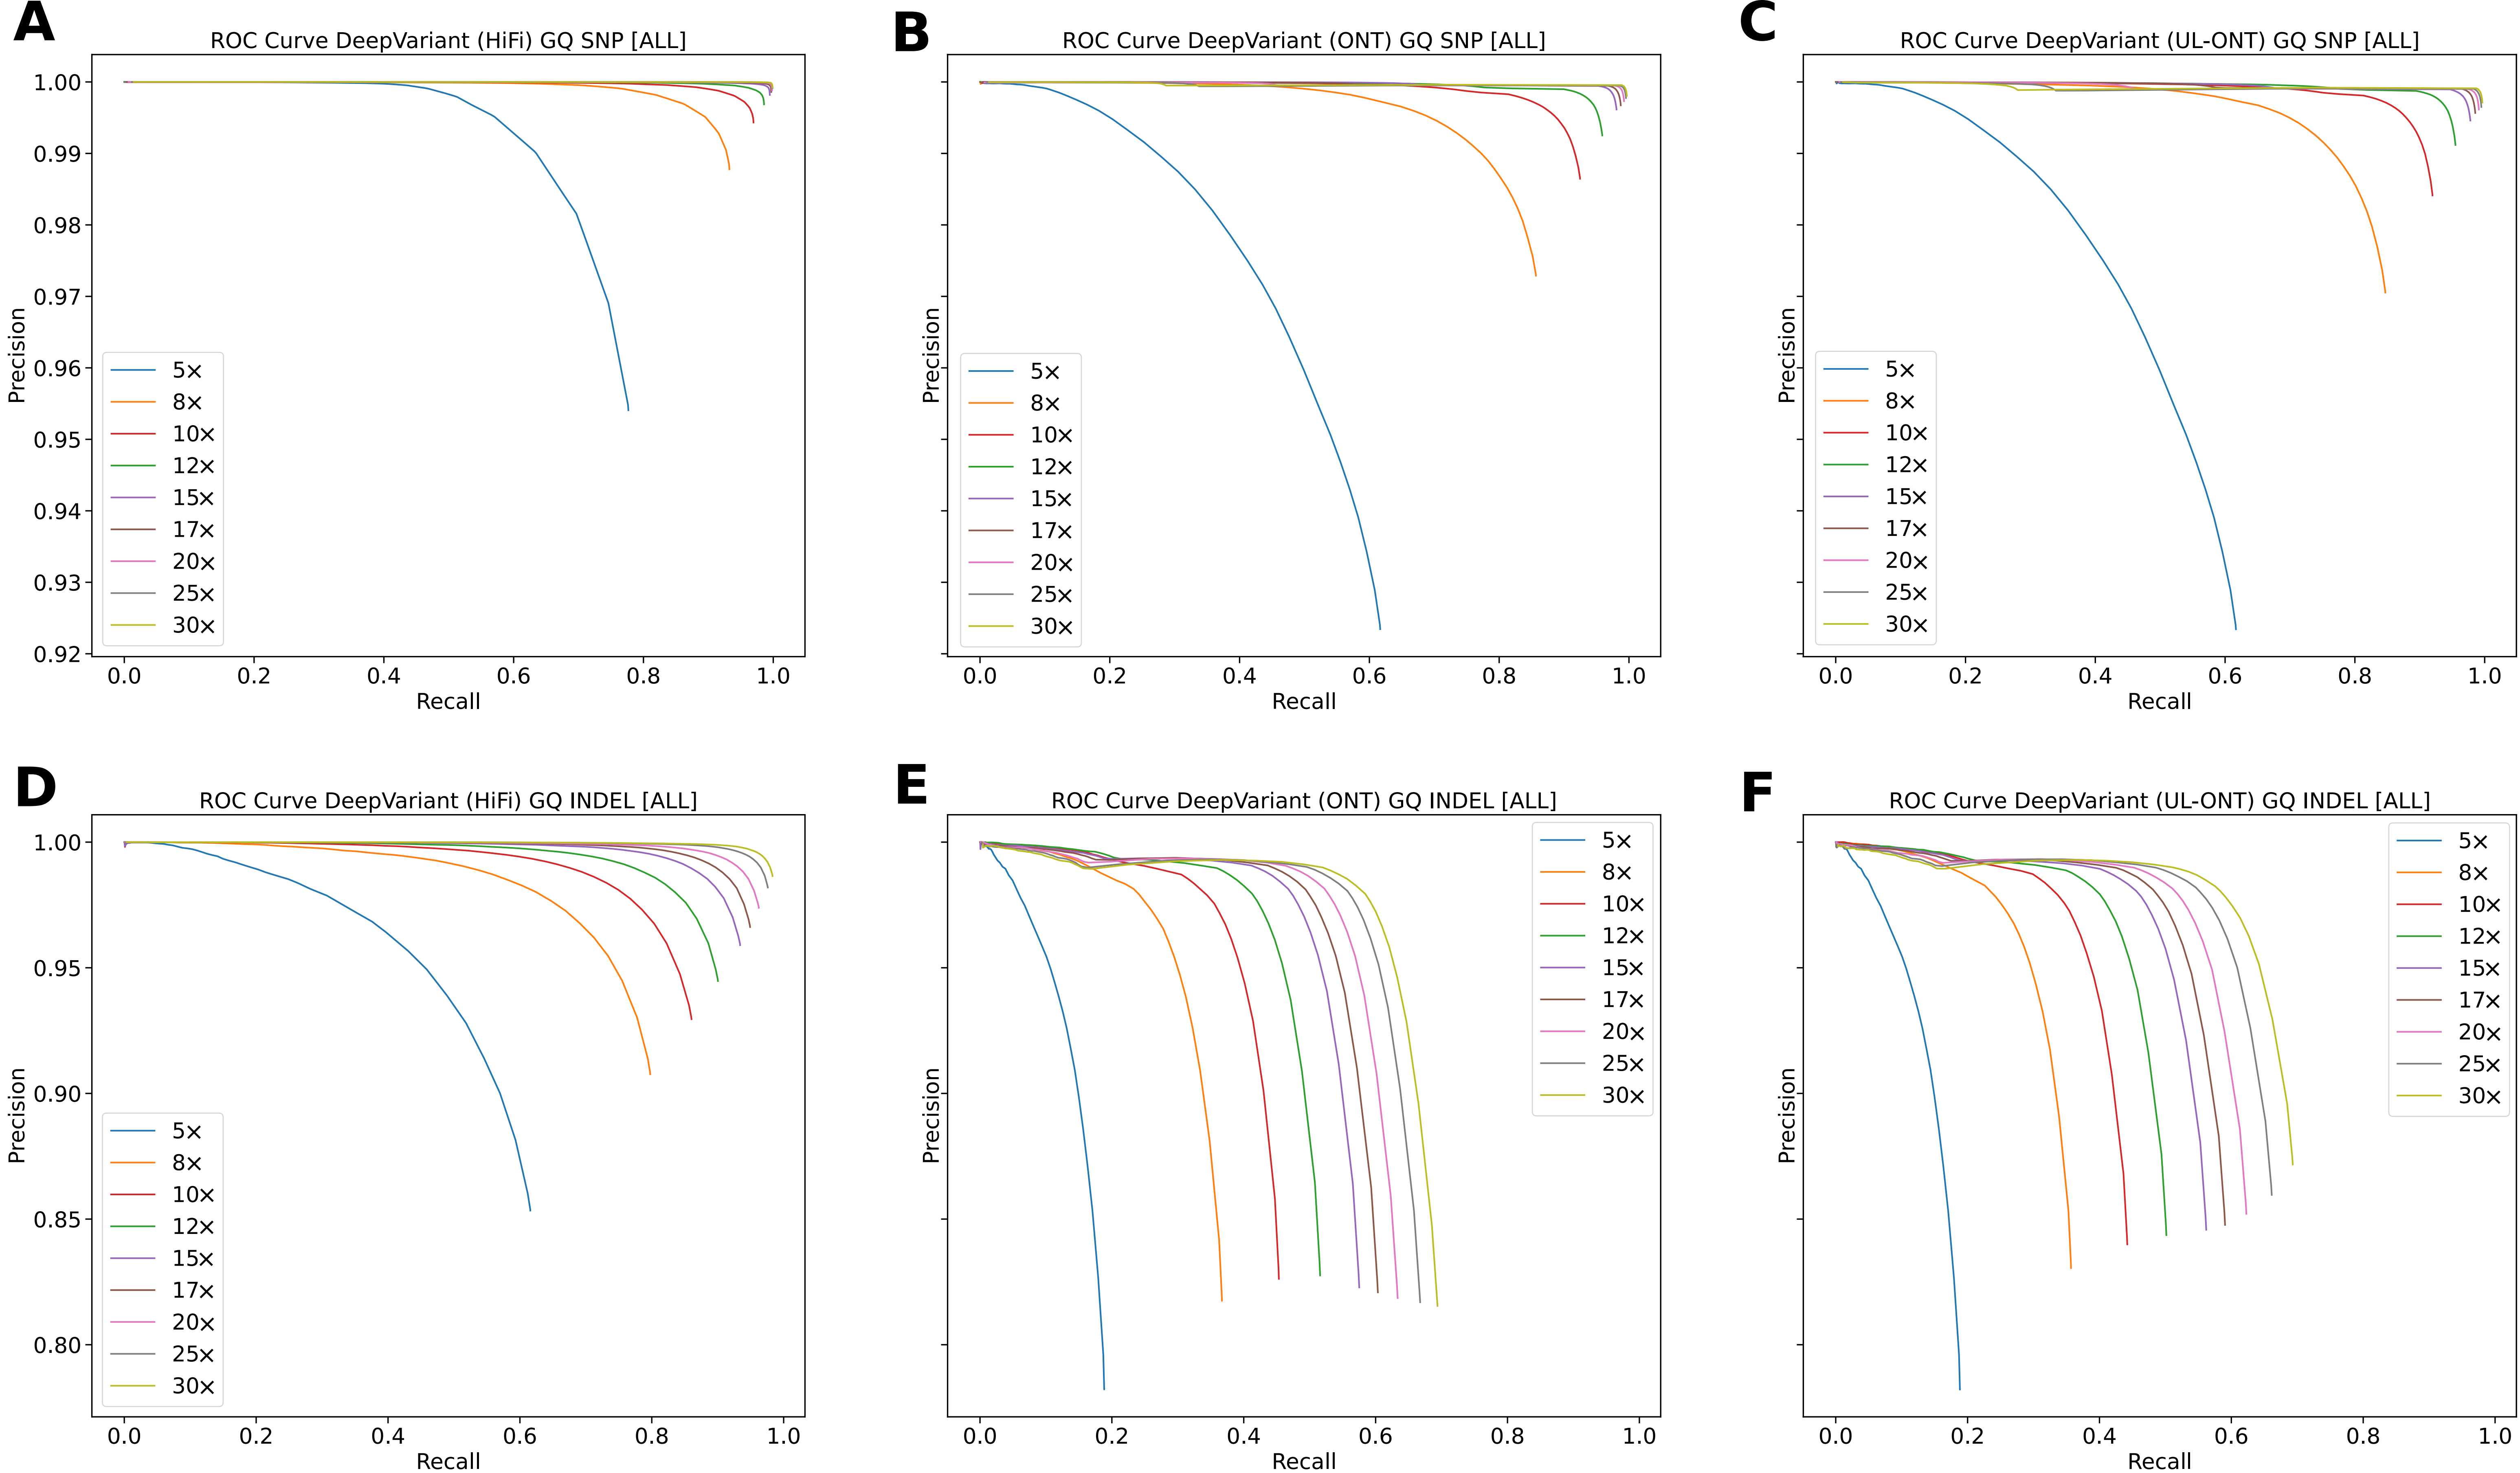

**Figure S4. ROC curve analysis as a function of GQ in DeepVariant.** ROC curves for DeepVariant SNVs and indels at each of the coverage thresholds for HiFi (**A,D**), ONT (**B,E**), and UL-ONT (**C,F**).
