# Supplementary material for: Whole-genome long-read sequencing downsampling and its effect on variant-calling precision and recall
Source: HighWire-hosted journal article supplement (doi:10.1101/gr.278070.123), 2023-12-01
Supplement: Supplemental_Figure_S5.pdf [file Supplemental_Figure_S5.pdf]

**A**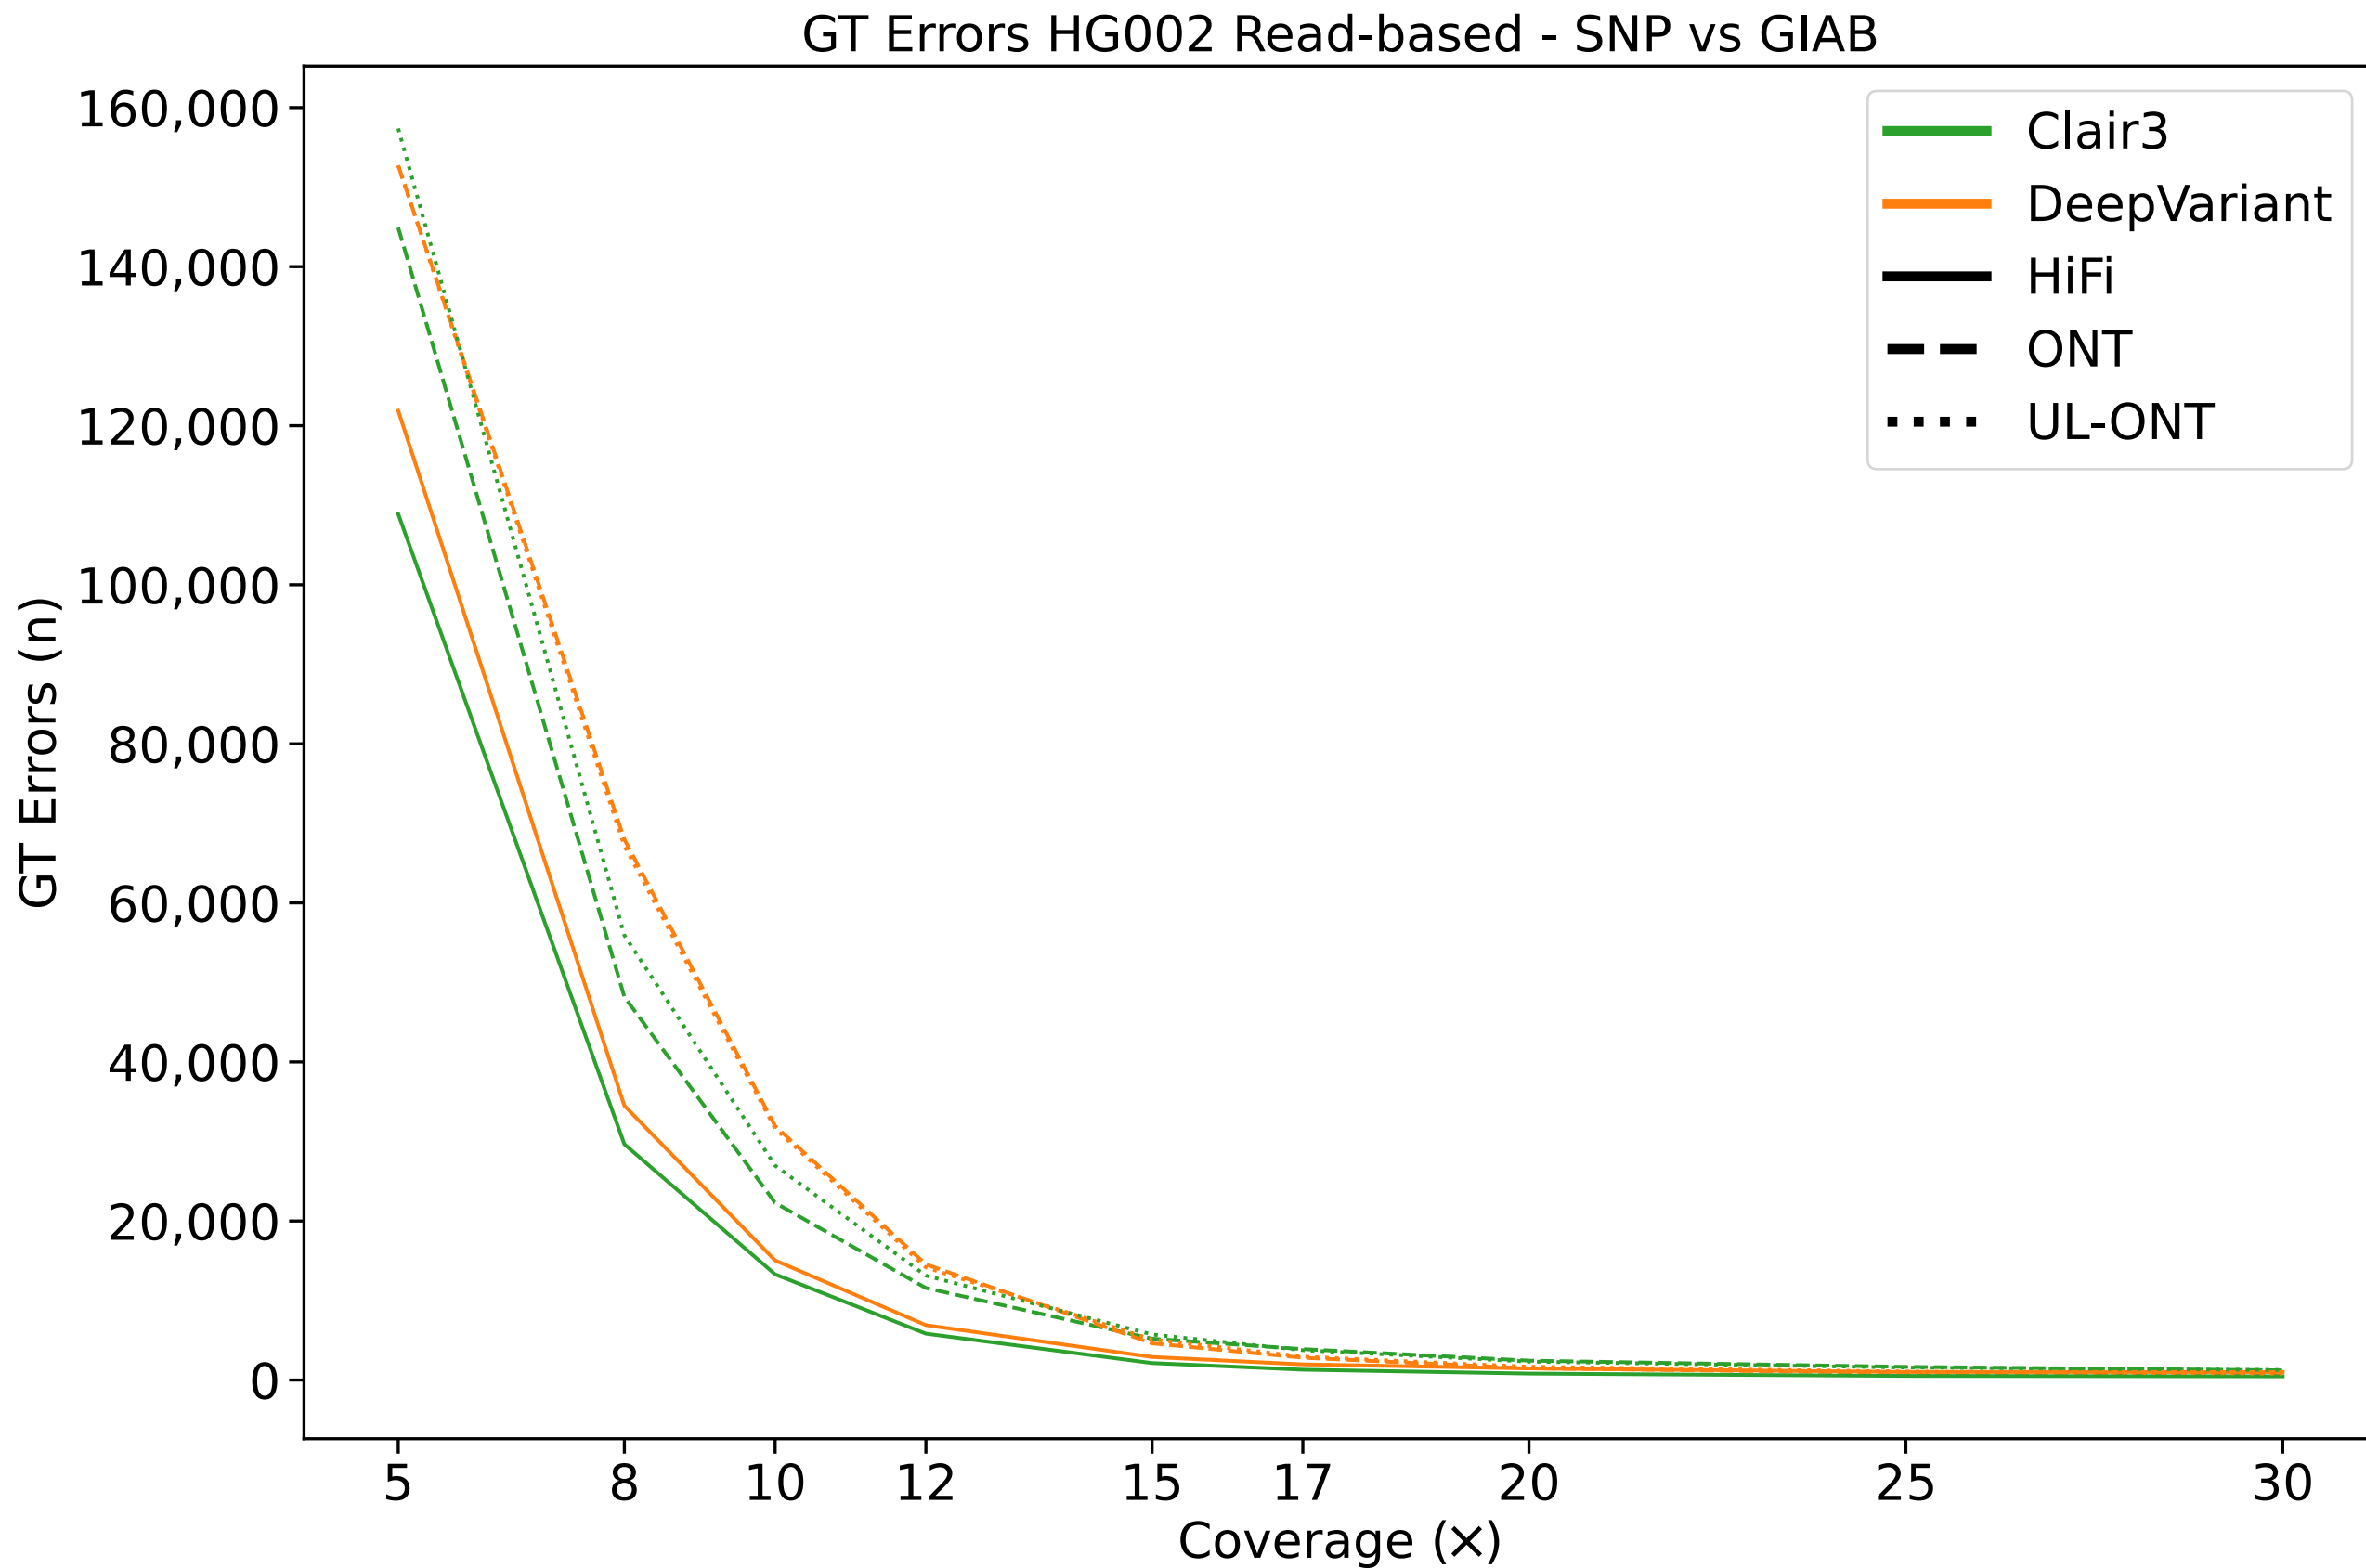**B**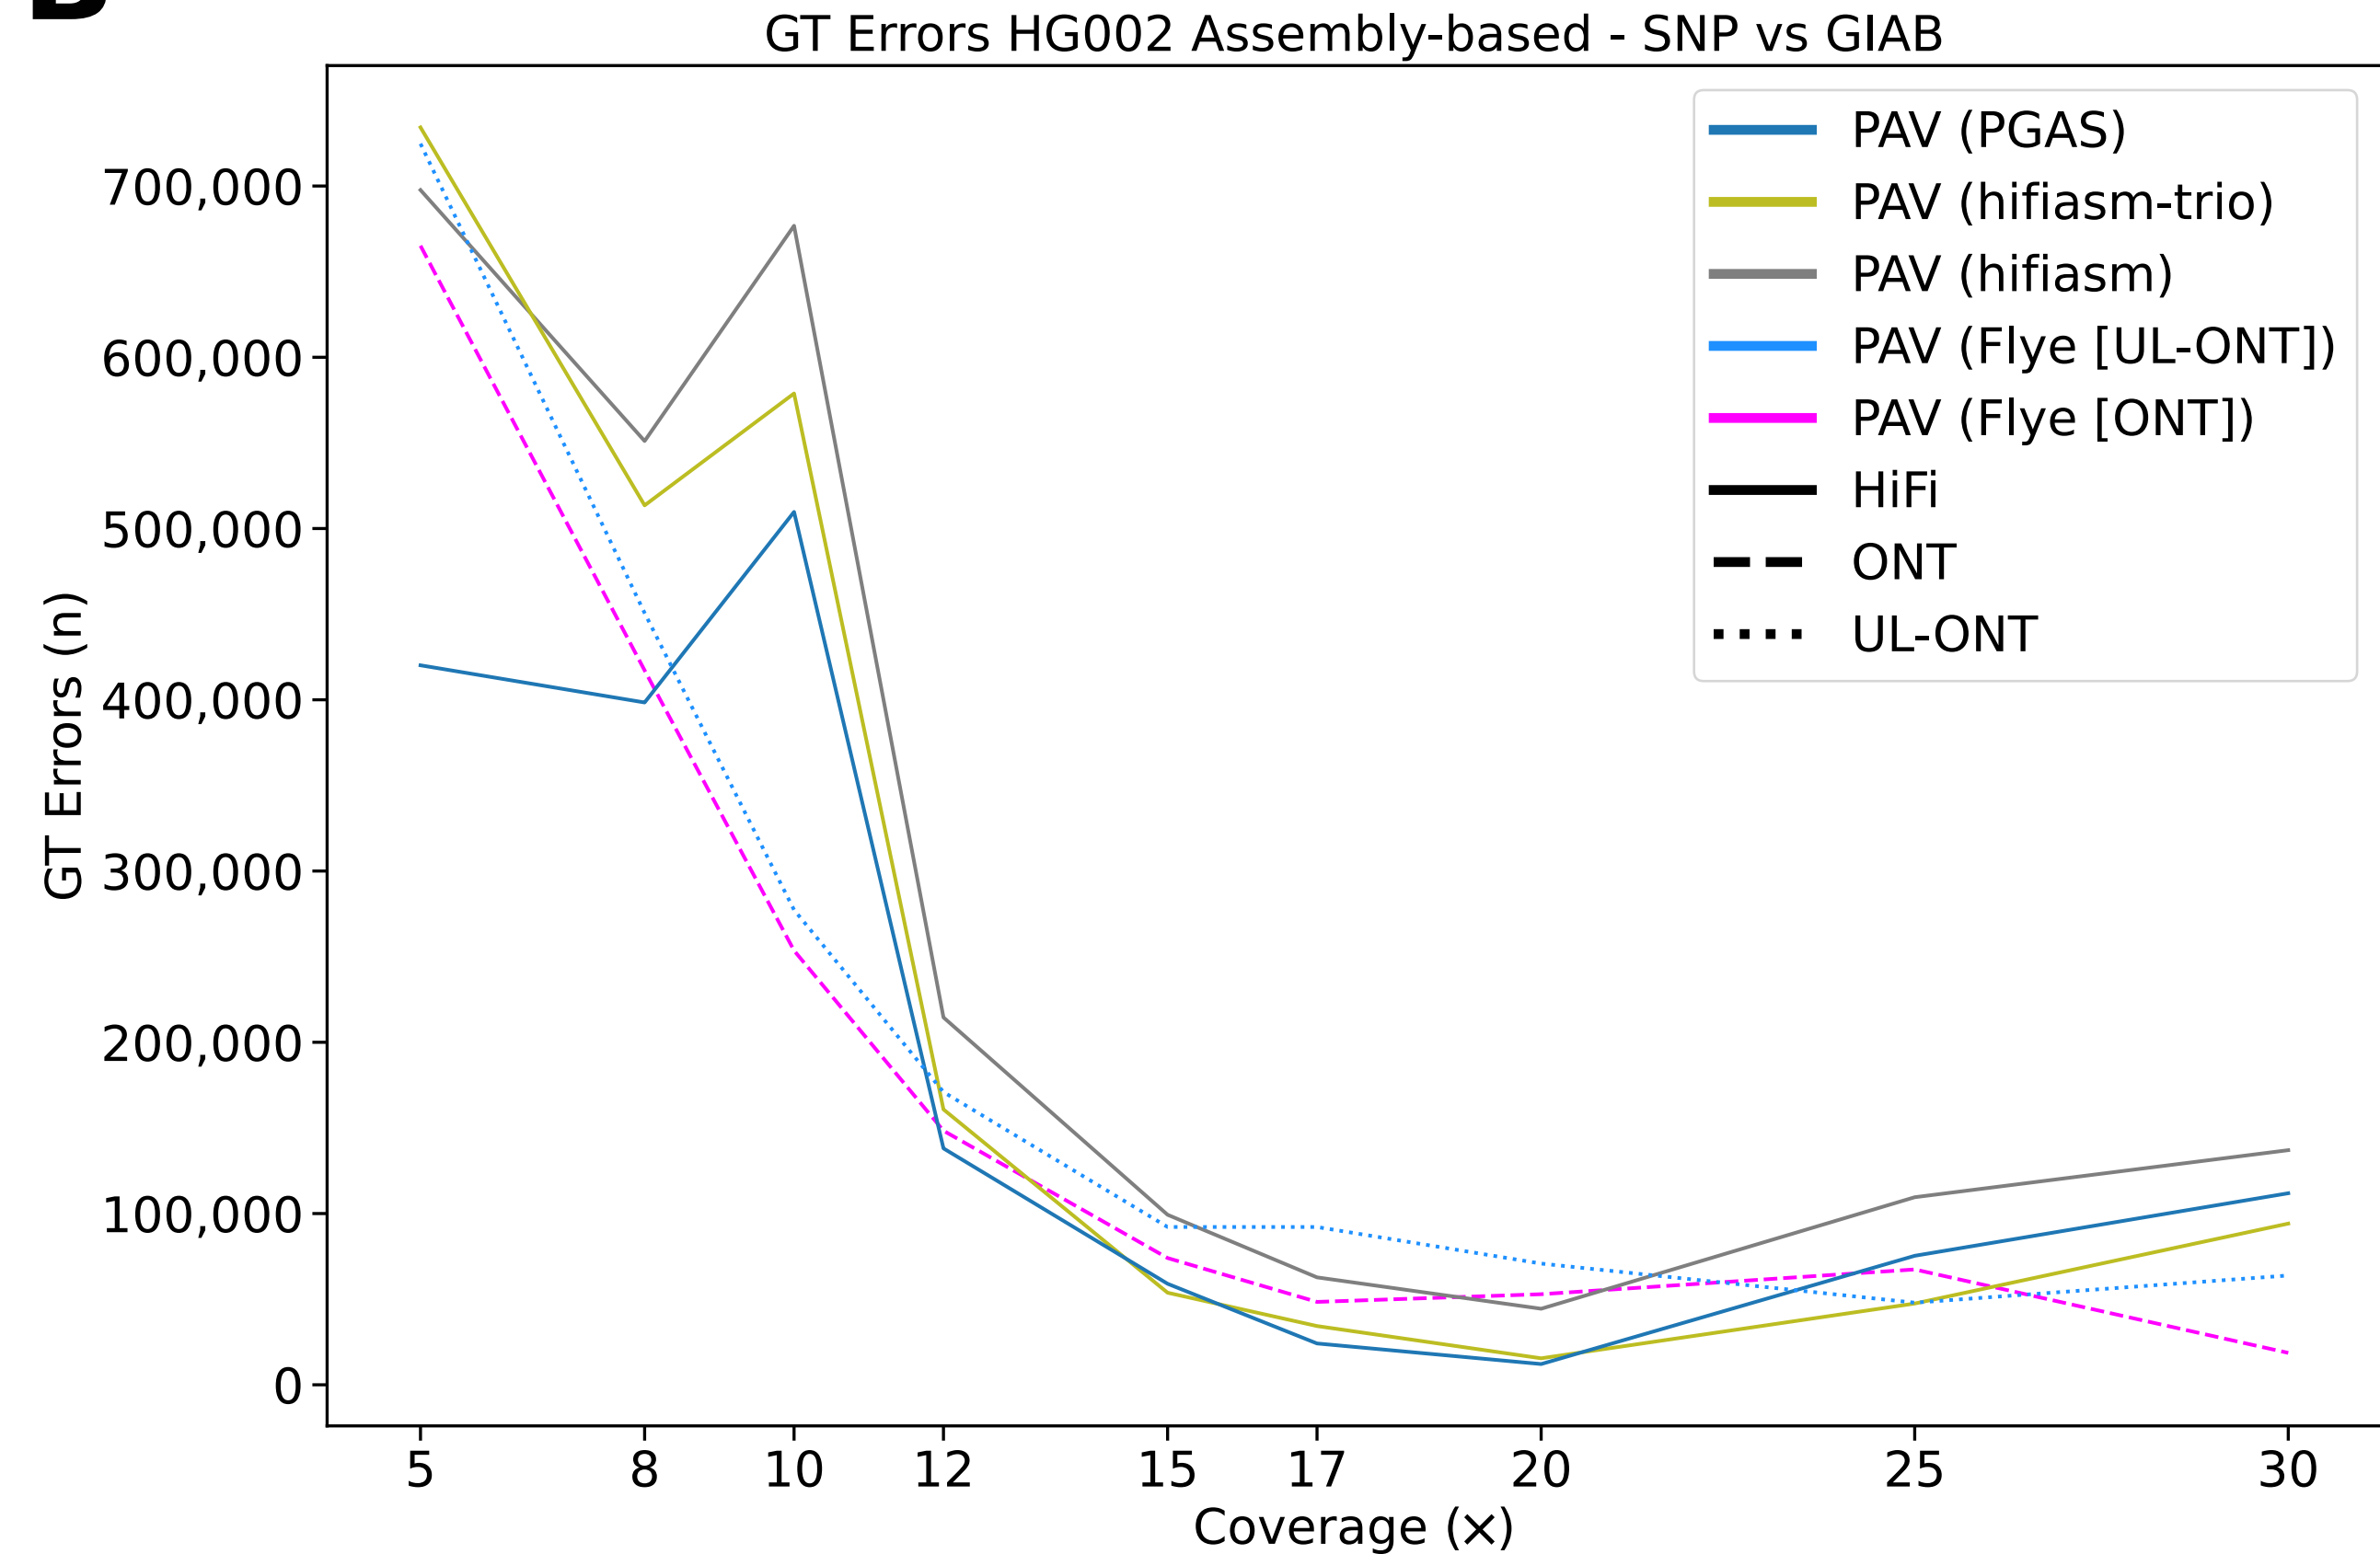

**Figure S5. Genotyping errors as a function of coverage in assembly and read-based single-nucleotide polymorphism (SNP) callsets. A)** Genotyping errors in read-based SNP callers show a similar minimum around 12× as caller precision overall saturates. **B)** Assembly-based SNP genotyping error is higher across all coverages compared to read-based methods.
