# Supplementary material for: Whole-genome long-read sequencing downsampling and its effect on variant-calling precision and recall
Source: HighWire-hosted journal article supplement (doi:10.1101/gr.278070.123), 2023-12-01
Supplement: Supplemental_Figure_S6.pdf [file Supplemental_Figure_S6.pdf]

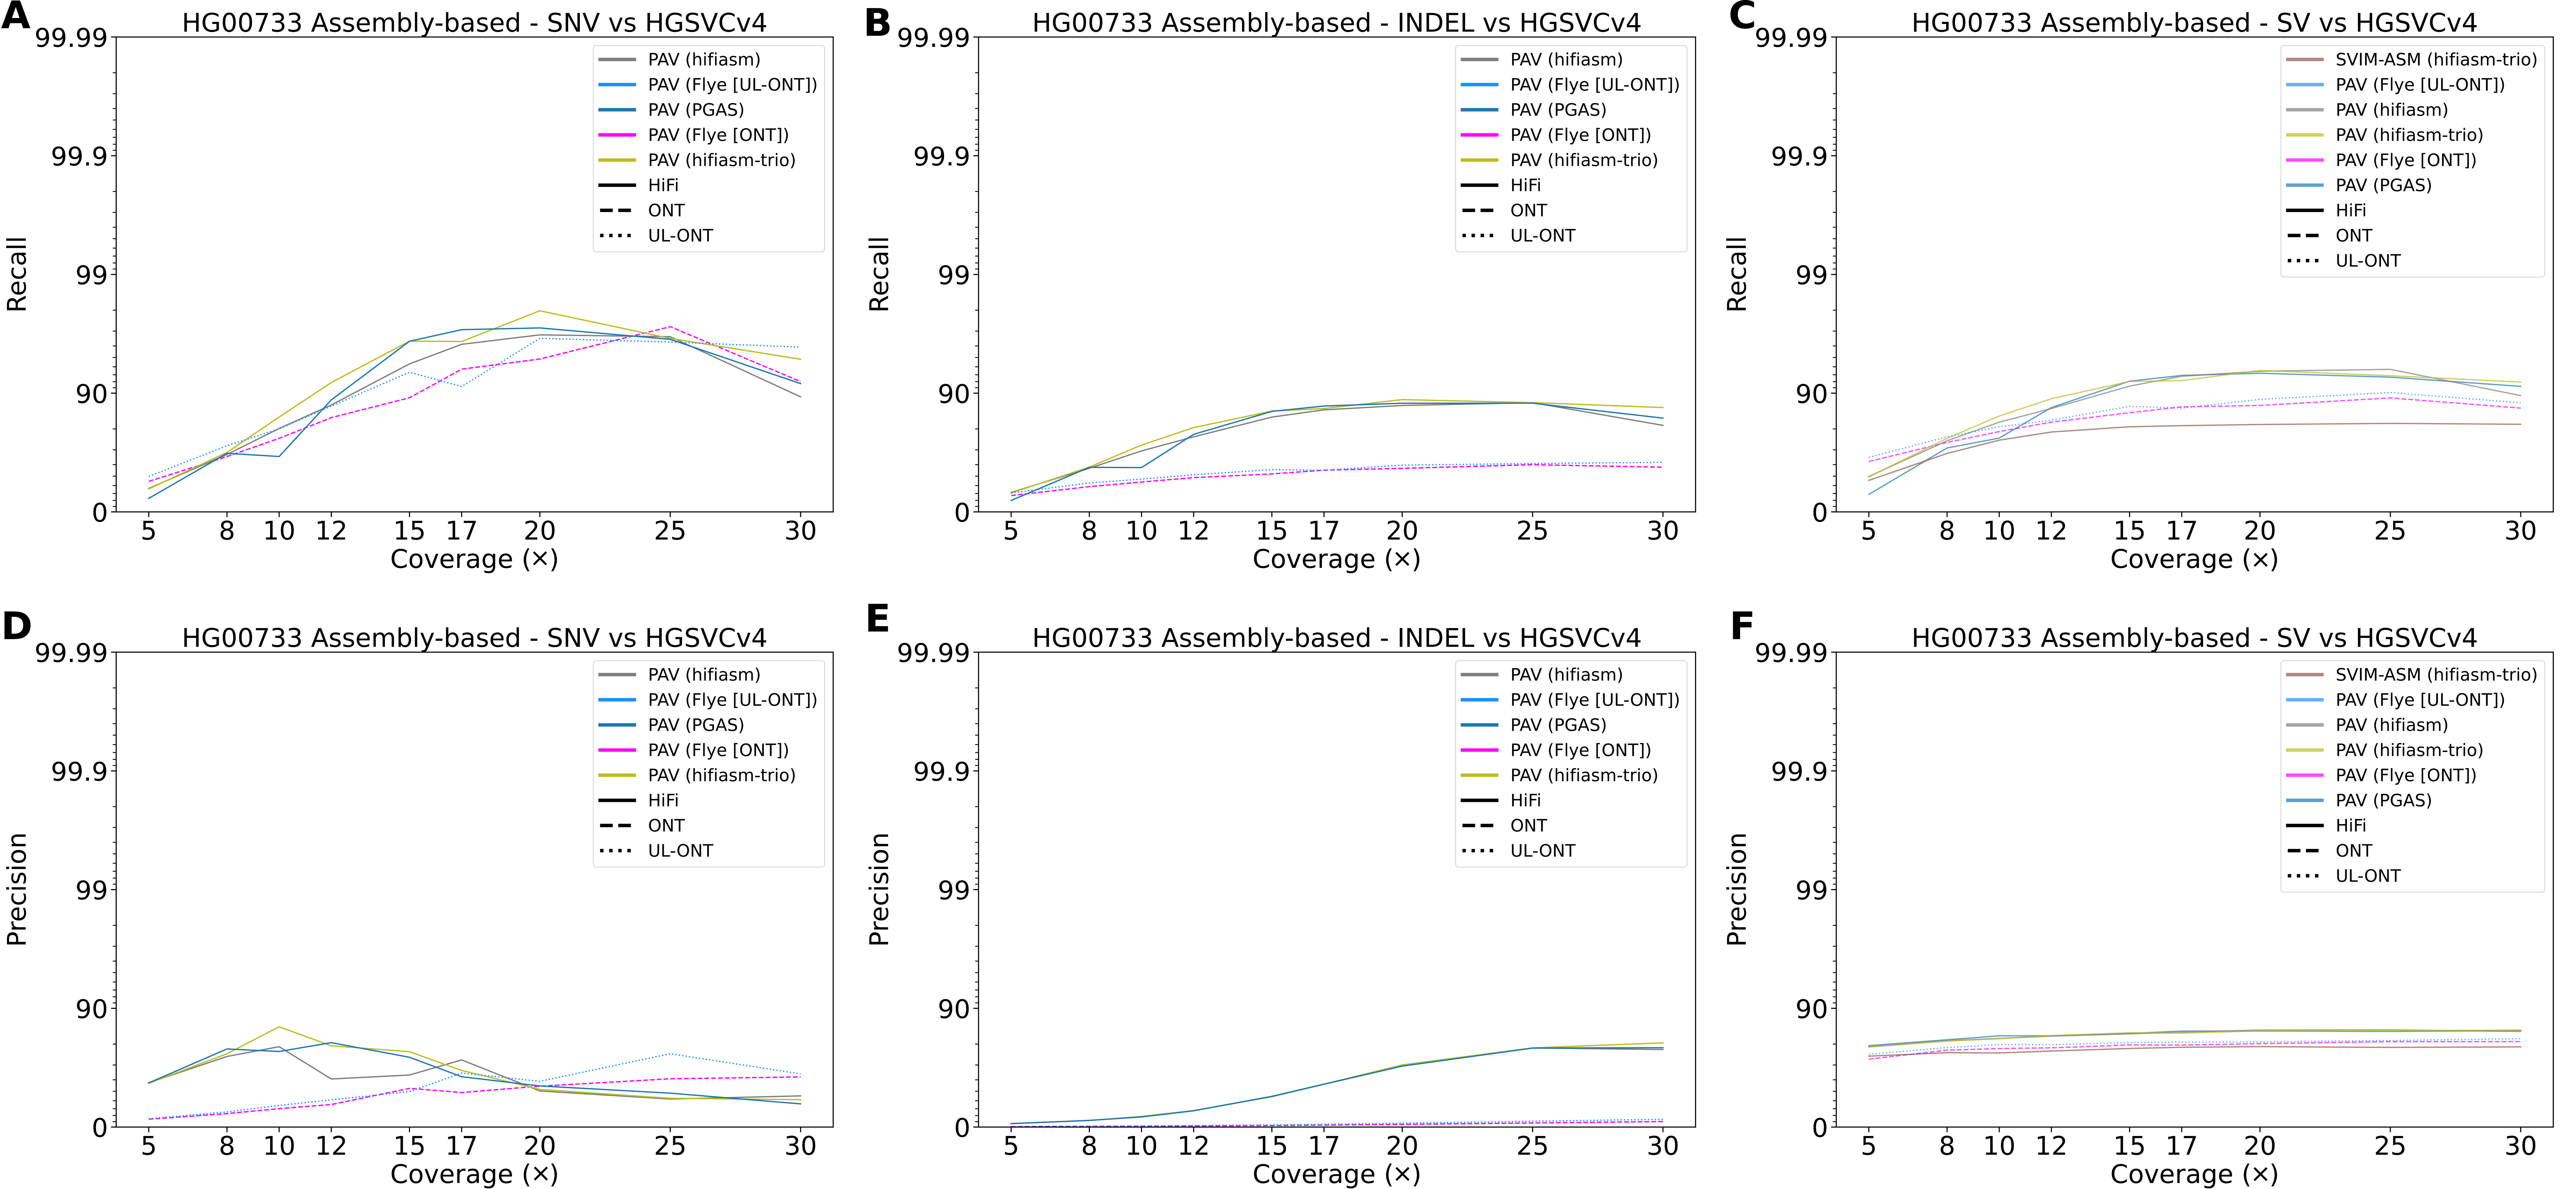

**Figure S6. Precision and recall for variant classes as a function of LRS coverage using assembly-based algorithms for HG00733.** **A)** Recall for HG00733 for HGSVC truth sets plotted against sequencing coverage for assembly-based callers across all algorithms capable of calling SNVs. **B)** Recall for HG00733 against HGSVC truth sets plotted against sequencing coverage for assembly-based callers across all algorithms capable of calling indels. Recall in ONT assemblies performs better at low coverages before being surpassed by HiFi assemblies at 12x. **C)** Recall for HG00733 against the HGSVC Freeze 4 truth set plotted against sequencing coverage for assembly-based callers across all algorithms capable of calling SVs. **D)** Precision for HG00733 against HGSVC truth sets plotted against sequencing coverage for read-based callers across all algorithms capable of calling SNVs. ONT methods are comparable to HiFi precision at high coverages but are noticeably worse at coverages below 15x. **E)** Precision plotted against sequencing coverage for assembly-based callers across all algorithms capable of calling indels. **F)** Precision plotted against sequencing coverage for assembly-based callers across all algorithms capable of calling SVs.
