# Supplementary material for: Whole-genome long-read sequencing downsampling and its effect on variant-calling precision and recall
Source: HighWire-hosted journal article supplement (doi:10.1101/gr.278070.123), 2023-12-01
Supplement: Supplemental_Figure_S7.pdf [file Supplemental_Figure_S7.pdf]

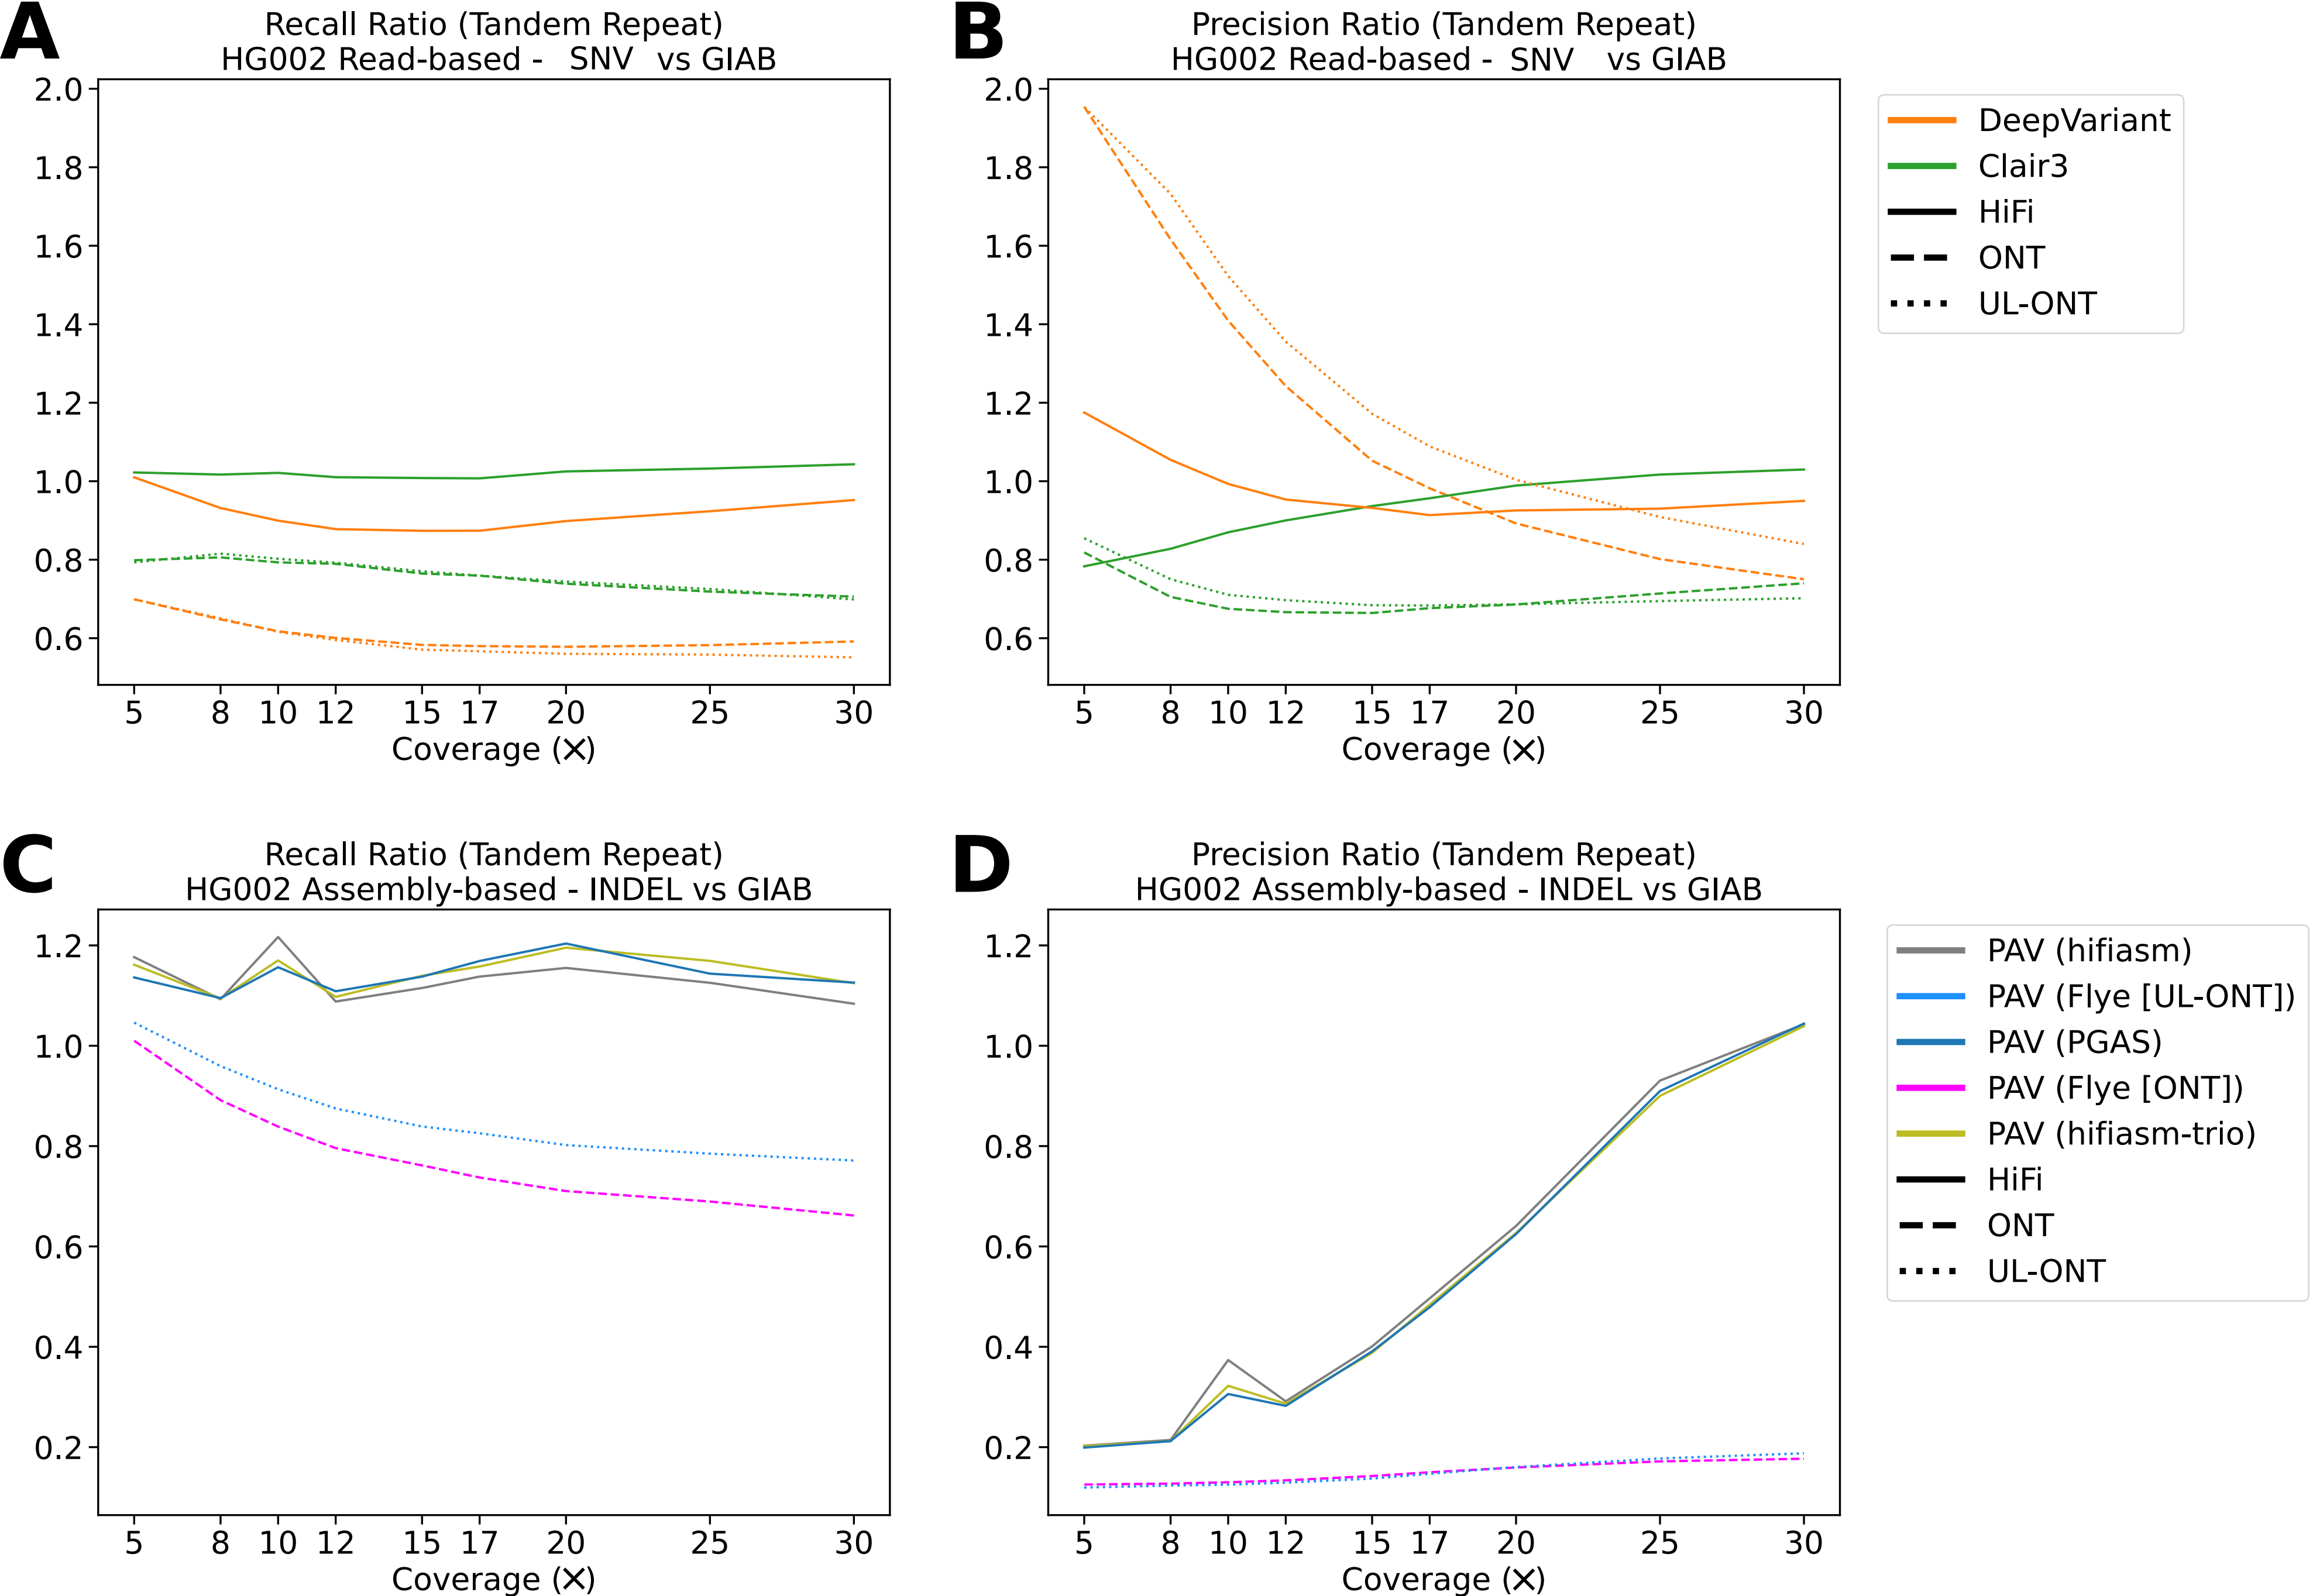

**Figure S7. Precision and recall with and without tandem repeats.** The ratio difference in the mean of all algorithms grouped by read-based (A,B) or assembly-based (C,D) callsets compared with and without tandem repeat as annotated by Tandem Repeats Finder (TRF). Values above 1 indicate increased performance outside of these regions. Read-based callers consistently show increased precision at all coverages when excluding these regions.
