# Supplementary material for: Whole-genome long-read sequencing downsampling and its effect on variant-calling precision and recall
Source: HighWire-hosted journal article supplement (doi:10.1101/gr.278070.123), 2023-12-01
Supplement: Supplemental_Figure_S8.pdf [file Supplemental_Figure_S8.pdf]

**A**

Recall Ratio (Homopolymer)  
HG002 Read-based - INDEL vs GIAB

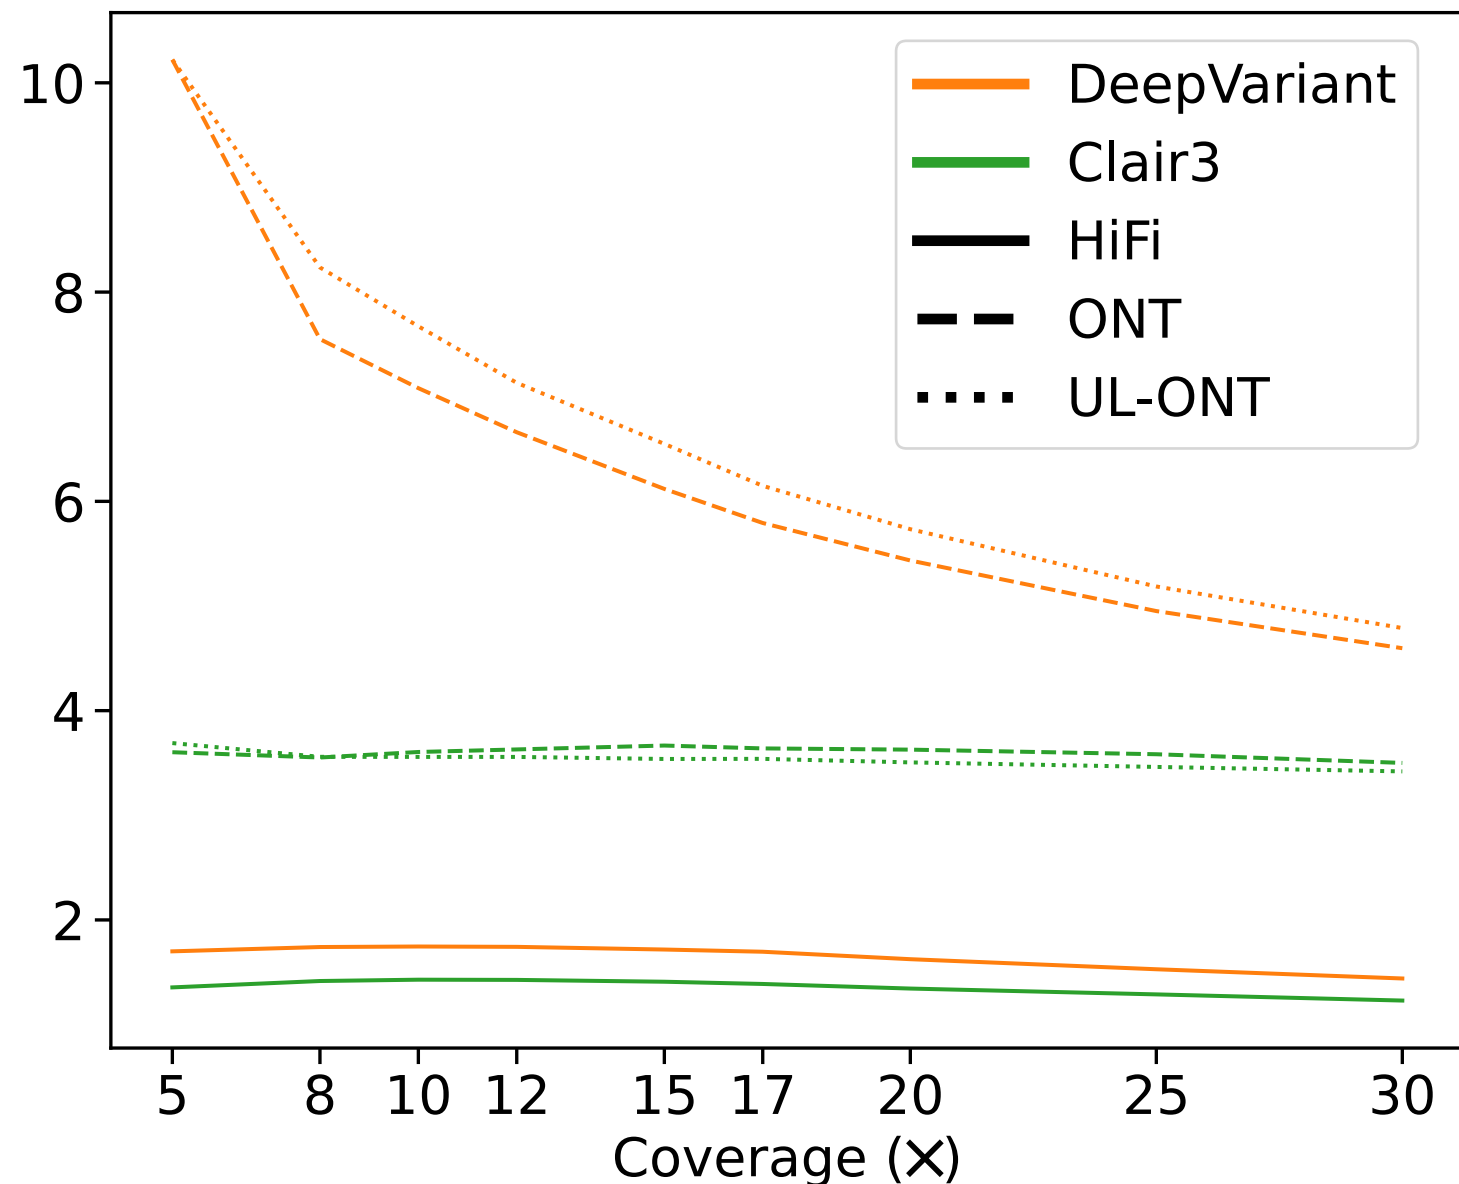**B**

Precision Ratio (Homopolymer)  
HG002 Read-based - INDEL vs GIAB

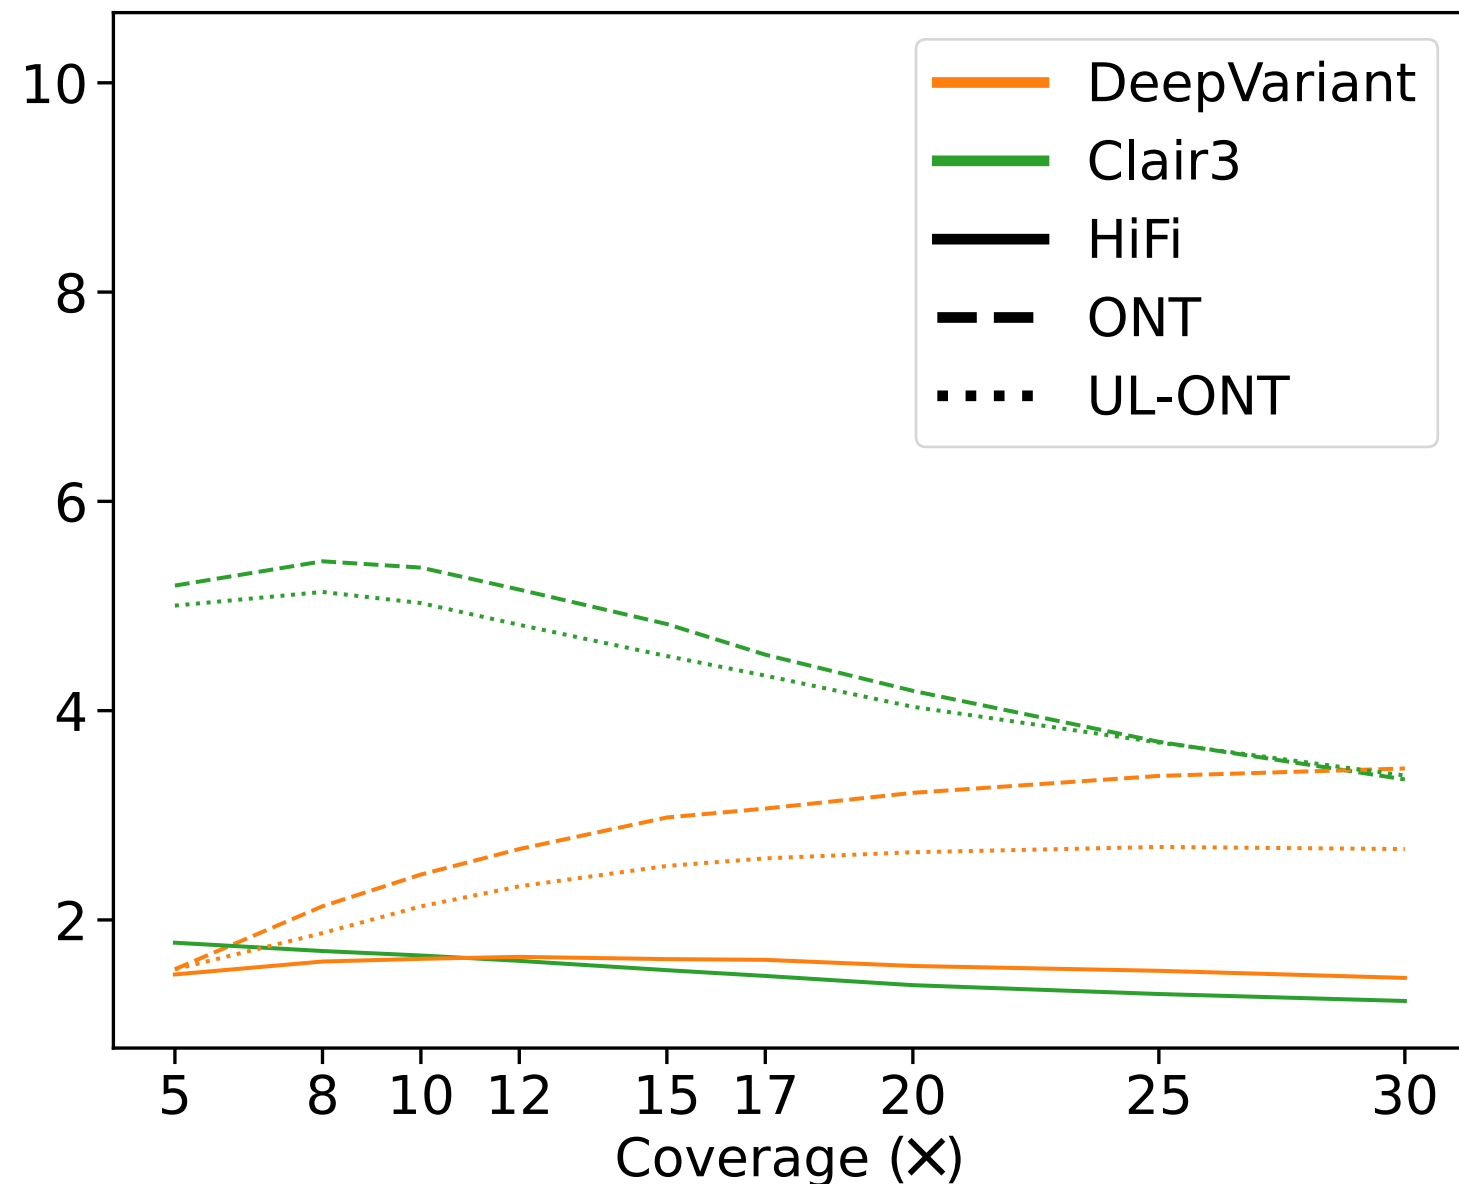

**Figure S8. Precision and recall with and without homopolymer. A)** Recall ratio between non-homopolymer and homopolymer DNA sequence (y-axis) for read-based methods that showed the most difference. A value greater than 1 reflects that recall is higher in non-homopolymer DNA sequence. **B)** Precision ratio between non-homopolymer and homopolymer DNA sequence (y-axis) for read-based methods that showed the most dramatic difference. Of note is the decreased accuracy of small DeepVariant insertions in our UL-ONT calls. A value greater than 1 reflects that recall is higher in non-homopolymer DNA sequence.
