# Supplementary material for: Whole-genome long-read sequencing downsampling and its effect on variant-calling precision and recall
Source: HighWire-hosted journal article supplement (doi:10.1101/gr.278070.123), 2023-12-01
Supplement: Supplemental_Figure_S10.pdf [file Supplemental_Figure_S10.pdf]

**A**

HG002 (10×) vs GRCh38

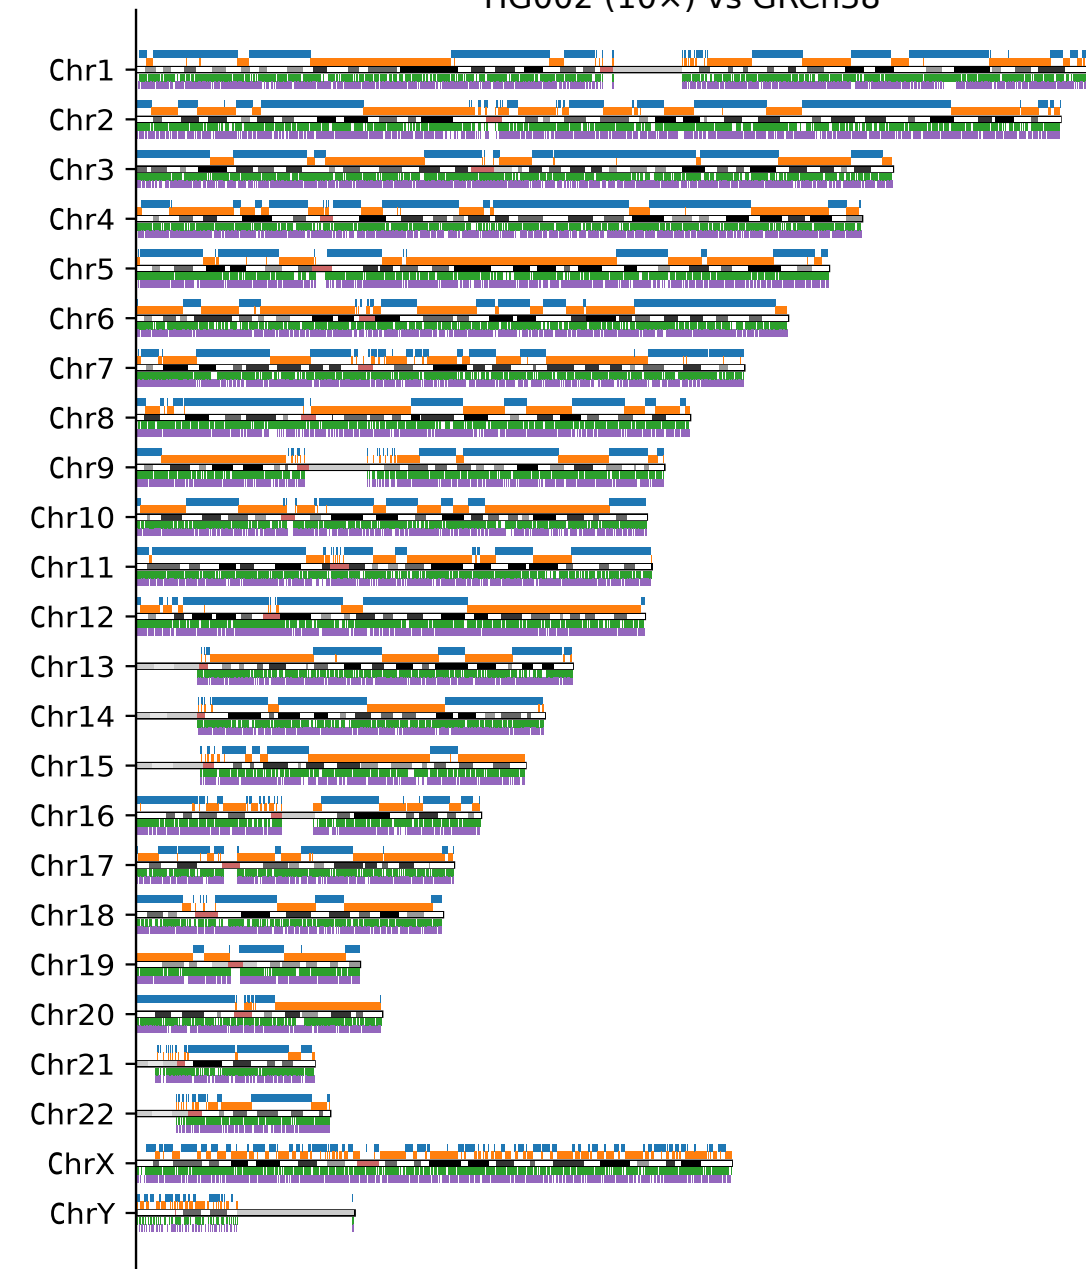**B**

HG002 (30×) vs GRCh38

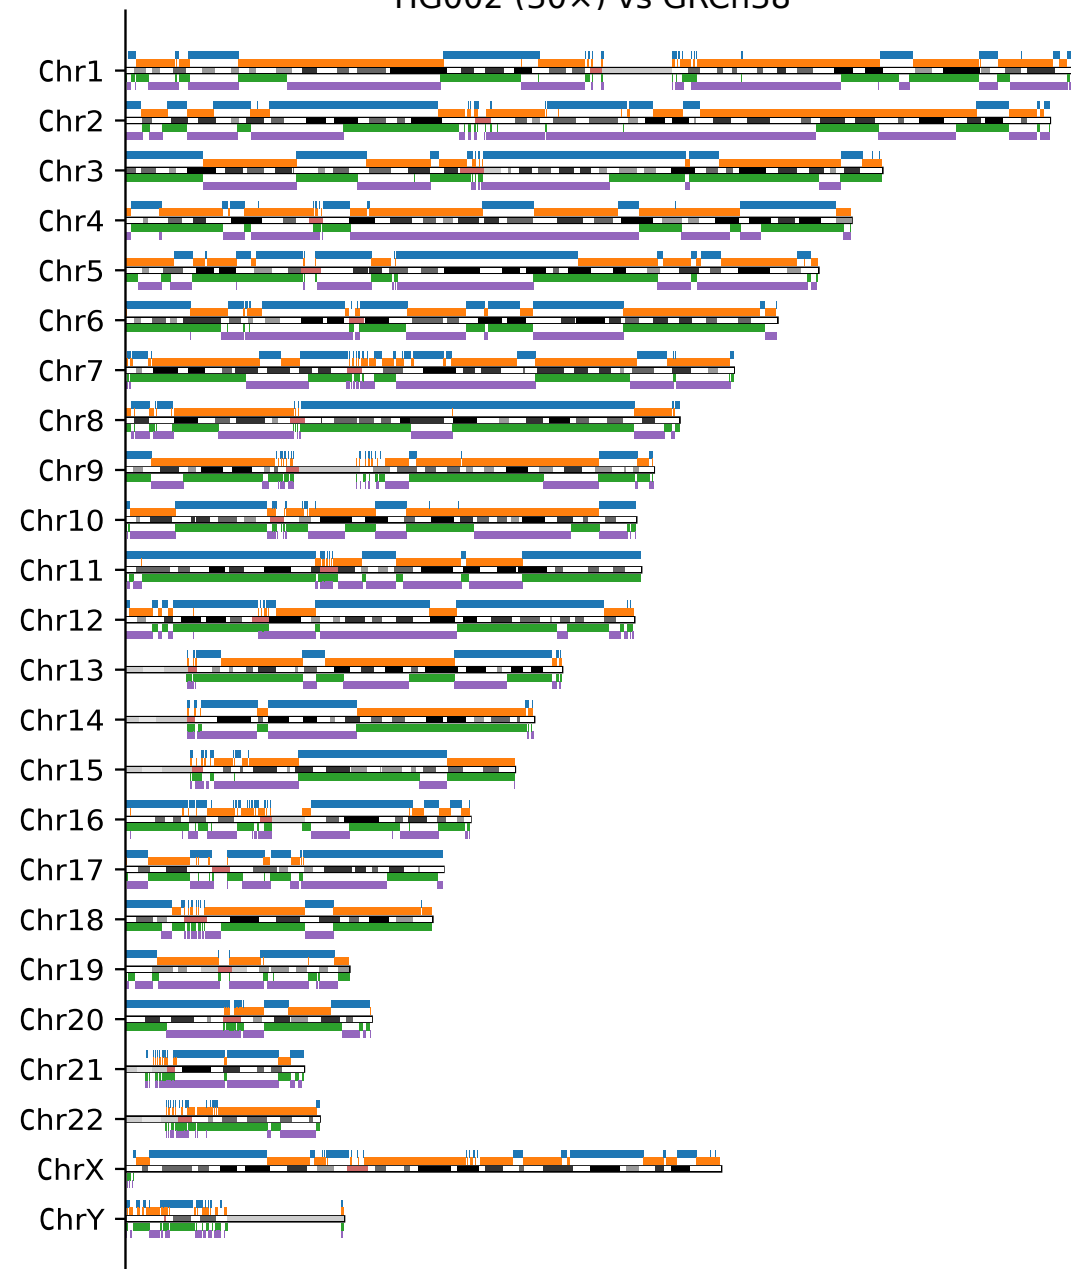

**Figure S10. Assembly contiguity. A)** Ideogram showing comparison of assembly contiguity between Flye with UL-ONT (top) vs. trio-binned hifiasm with PacBio HiFi (bottom) at 10× sequencing depth. Each example only uses a single haplotype, and changes in color indicate consecutively aligned contigs. **B)** Ideogram showing comparison of assembly contiguity between Flye with UL-ONT (top) vs. trio-binned hifiasm with PacBio HiFi (bottom) at 30× sequencing depth. Each example only uses a single haplotype, and changes in color indicate consecutively aligned contigs.
