# Supplementary material for: Whole-genome long-read sequencing downsampling and its effect on variant-calling precision and recall
Source: HighWire-hosted journal article supplement (doi:10.1101/gr.278070.123), 2023-12-01
Supplement: Supplemental_Figure_S11.pdf [file Supplemental_Figure_S11.pdf]

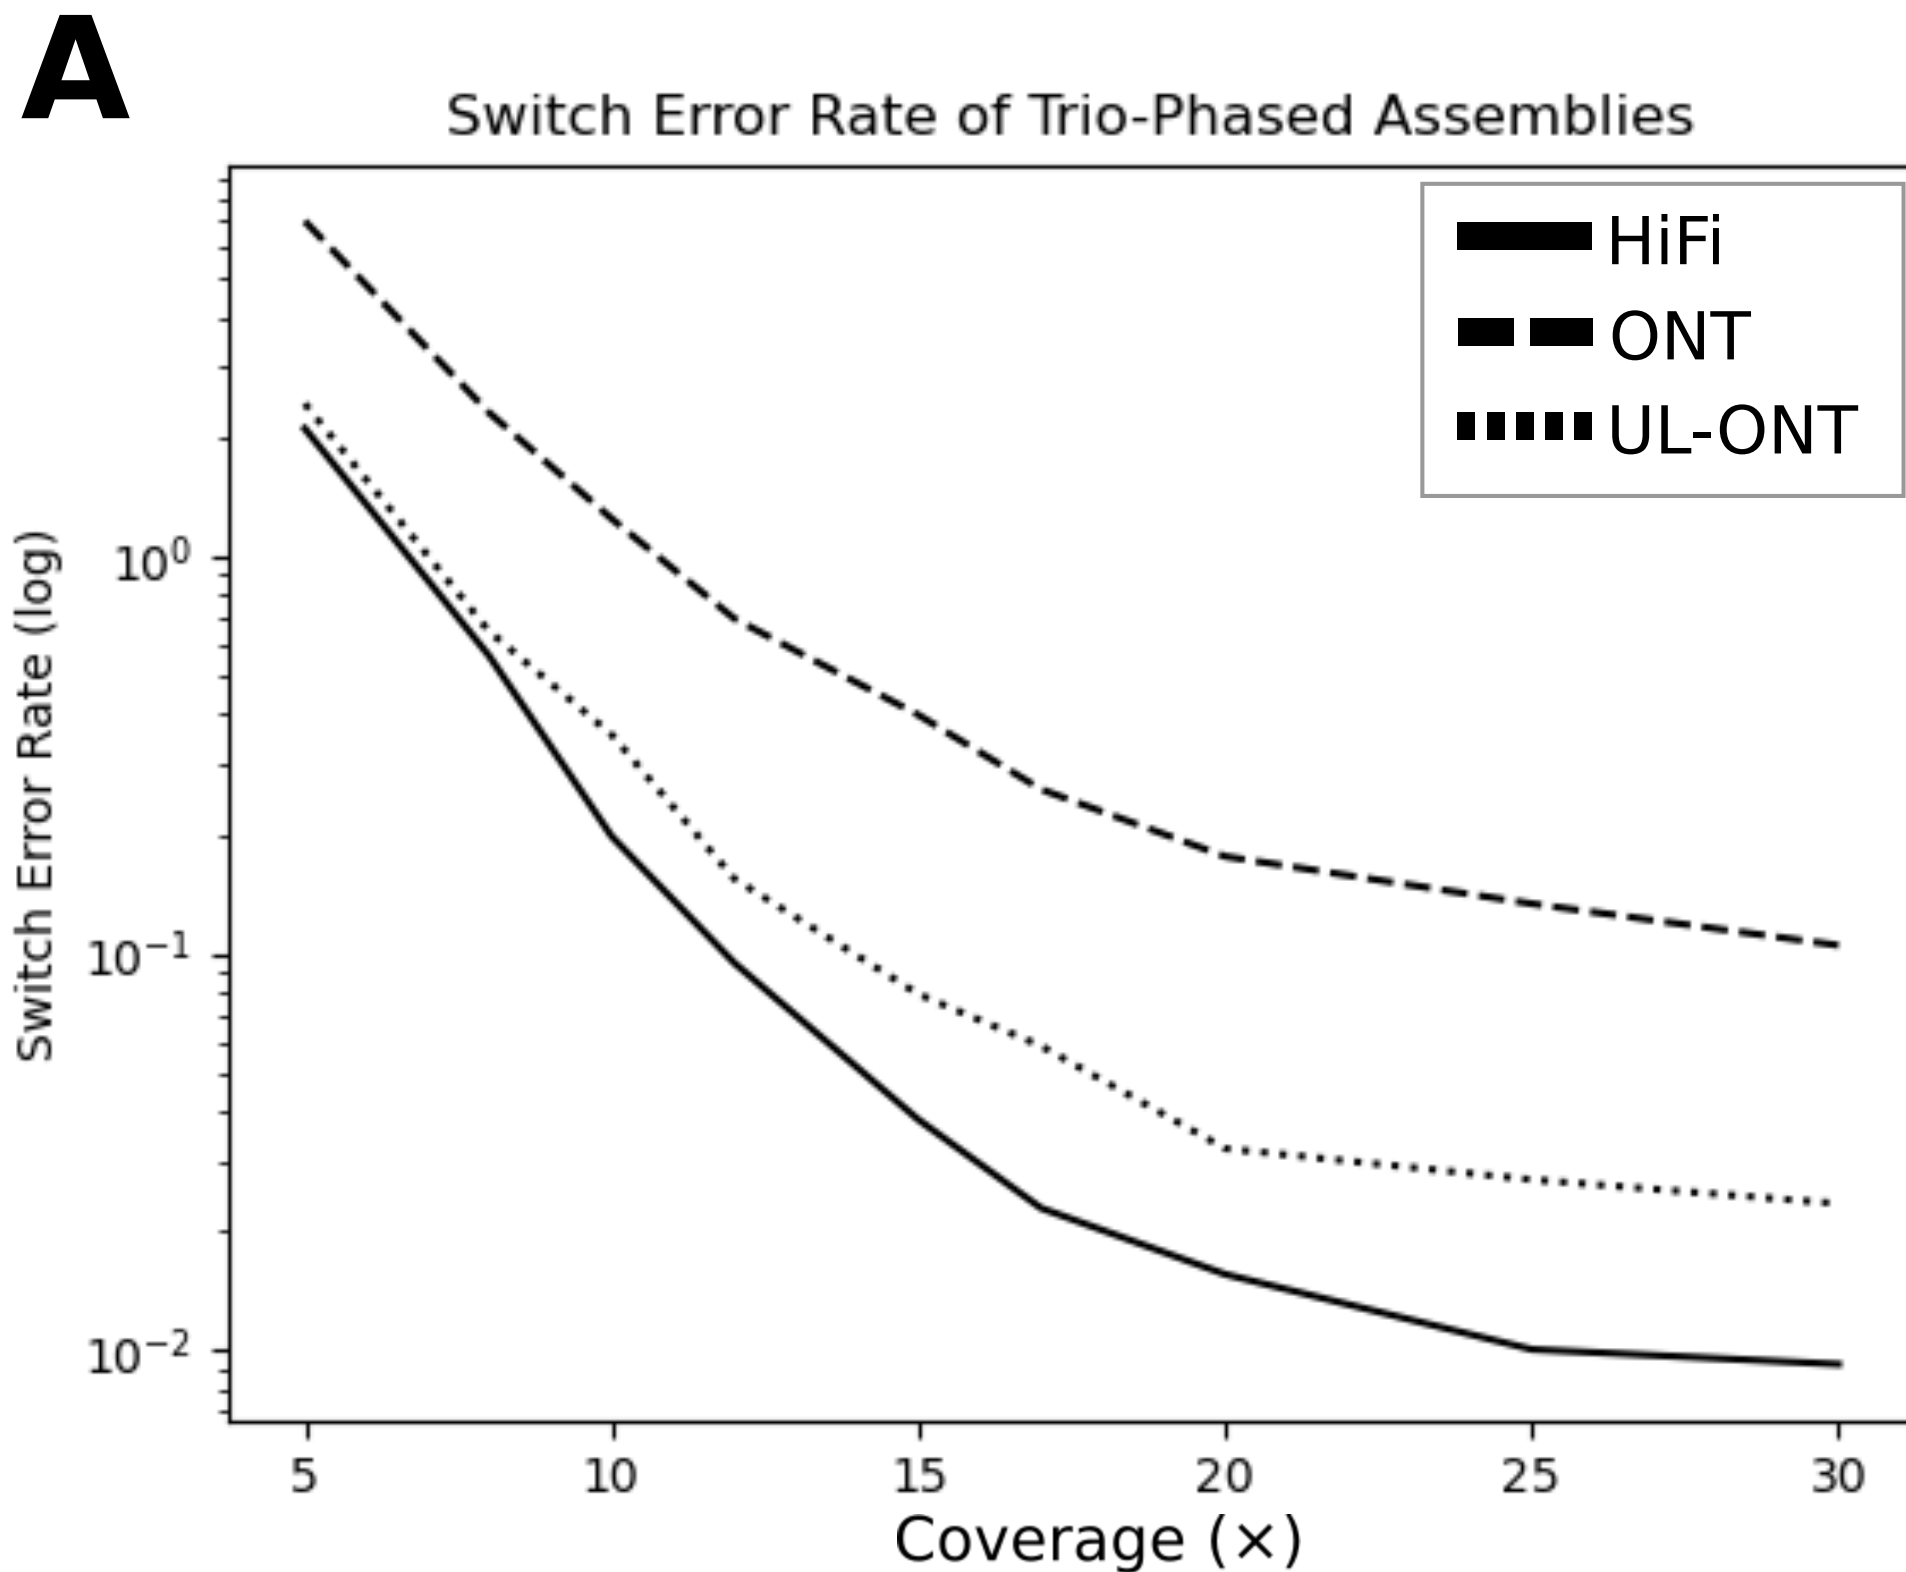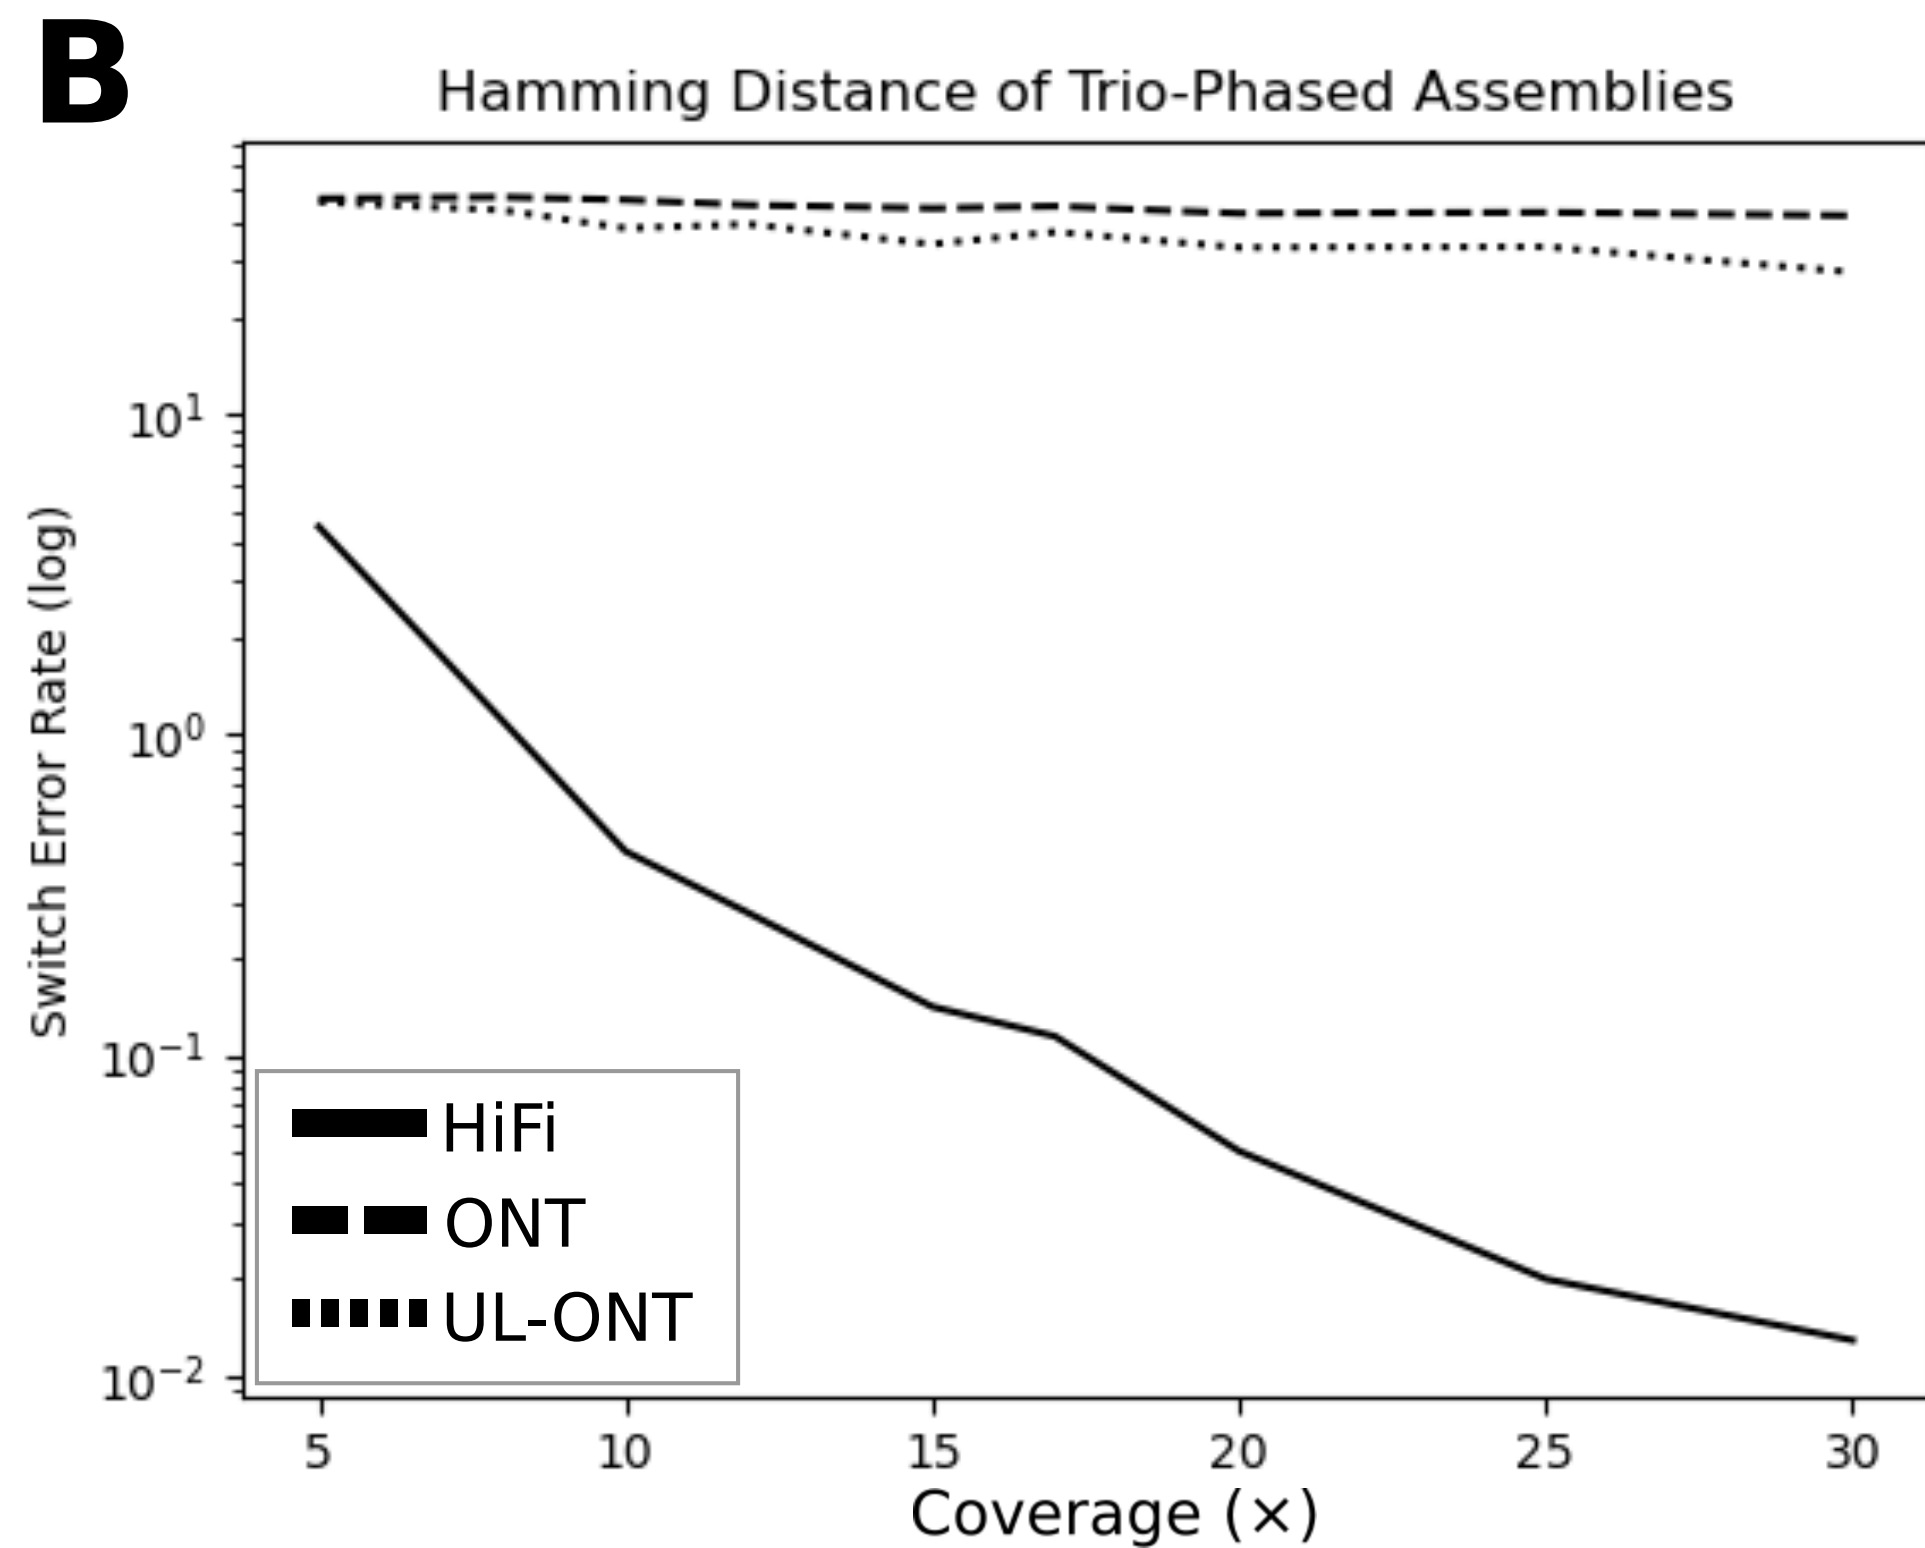

**Figure S11. Phasing accuracy of haplotype-resolved assemblies across sequencing technologies. A)** Log-scaled switch error rate of haplotype phased assemblies across technologies. Hifiasm datasets achieve the lowest switch error rate of all algorithms, although they do leverage parental data to do so. **B)** Log-scaled Hamming distance of phased assemblies. Integration of parental data allows for chromosome-scale phase blocks, which helps reduce Hamming distance dramatically.
