# Supplementary material for: Whole-genome long-read sequencing downsampling and its effect on variant-calling precision and recall
Source: HighWire-hosted journal article supplement (doi:10.1101/gr.278070.123), 2023-12-01
Supplement: Supplemental_Figure_S12.pdf [file Supplemental_Figure_S12.pdf]

**A****Ti/Tv HG002 - Read-based**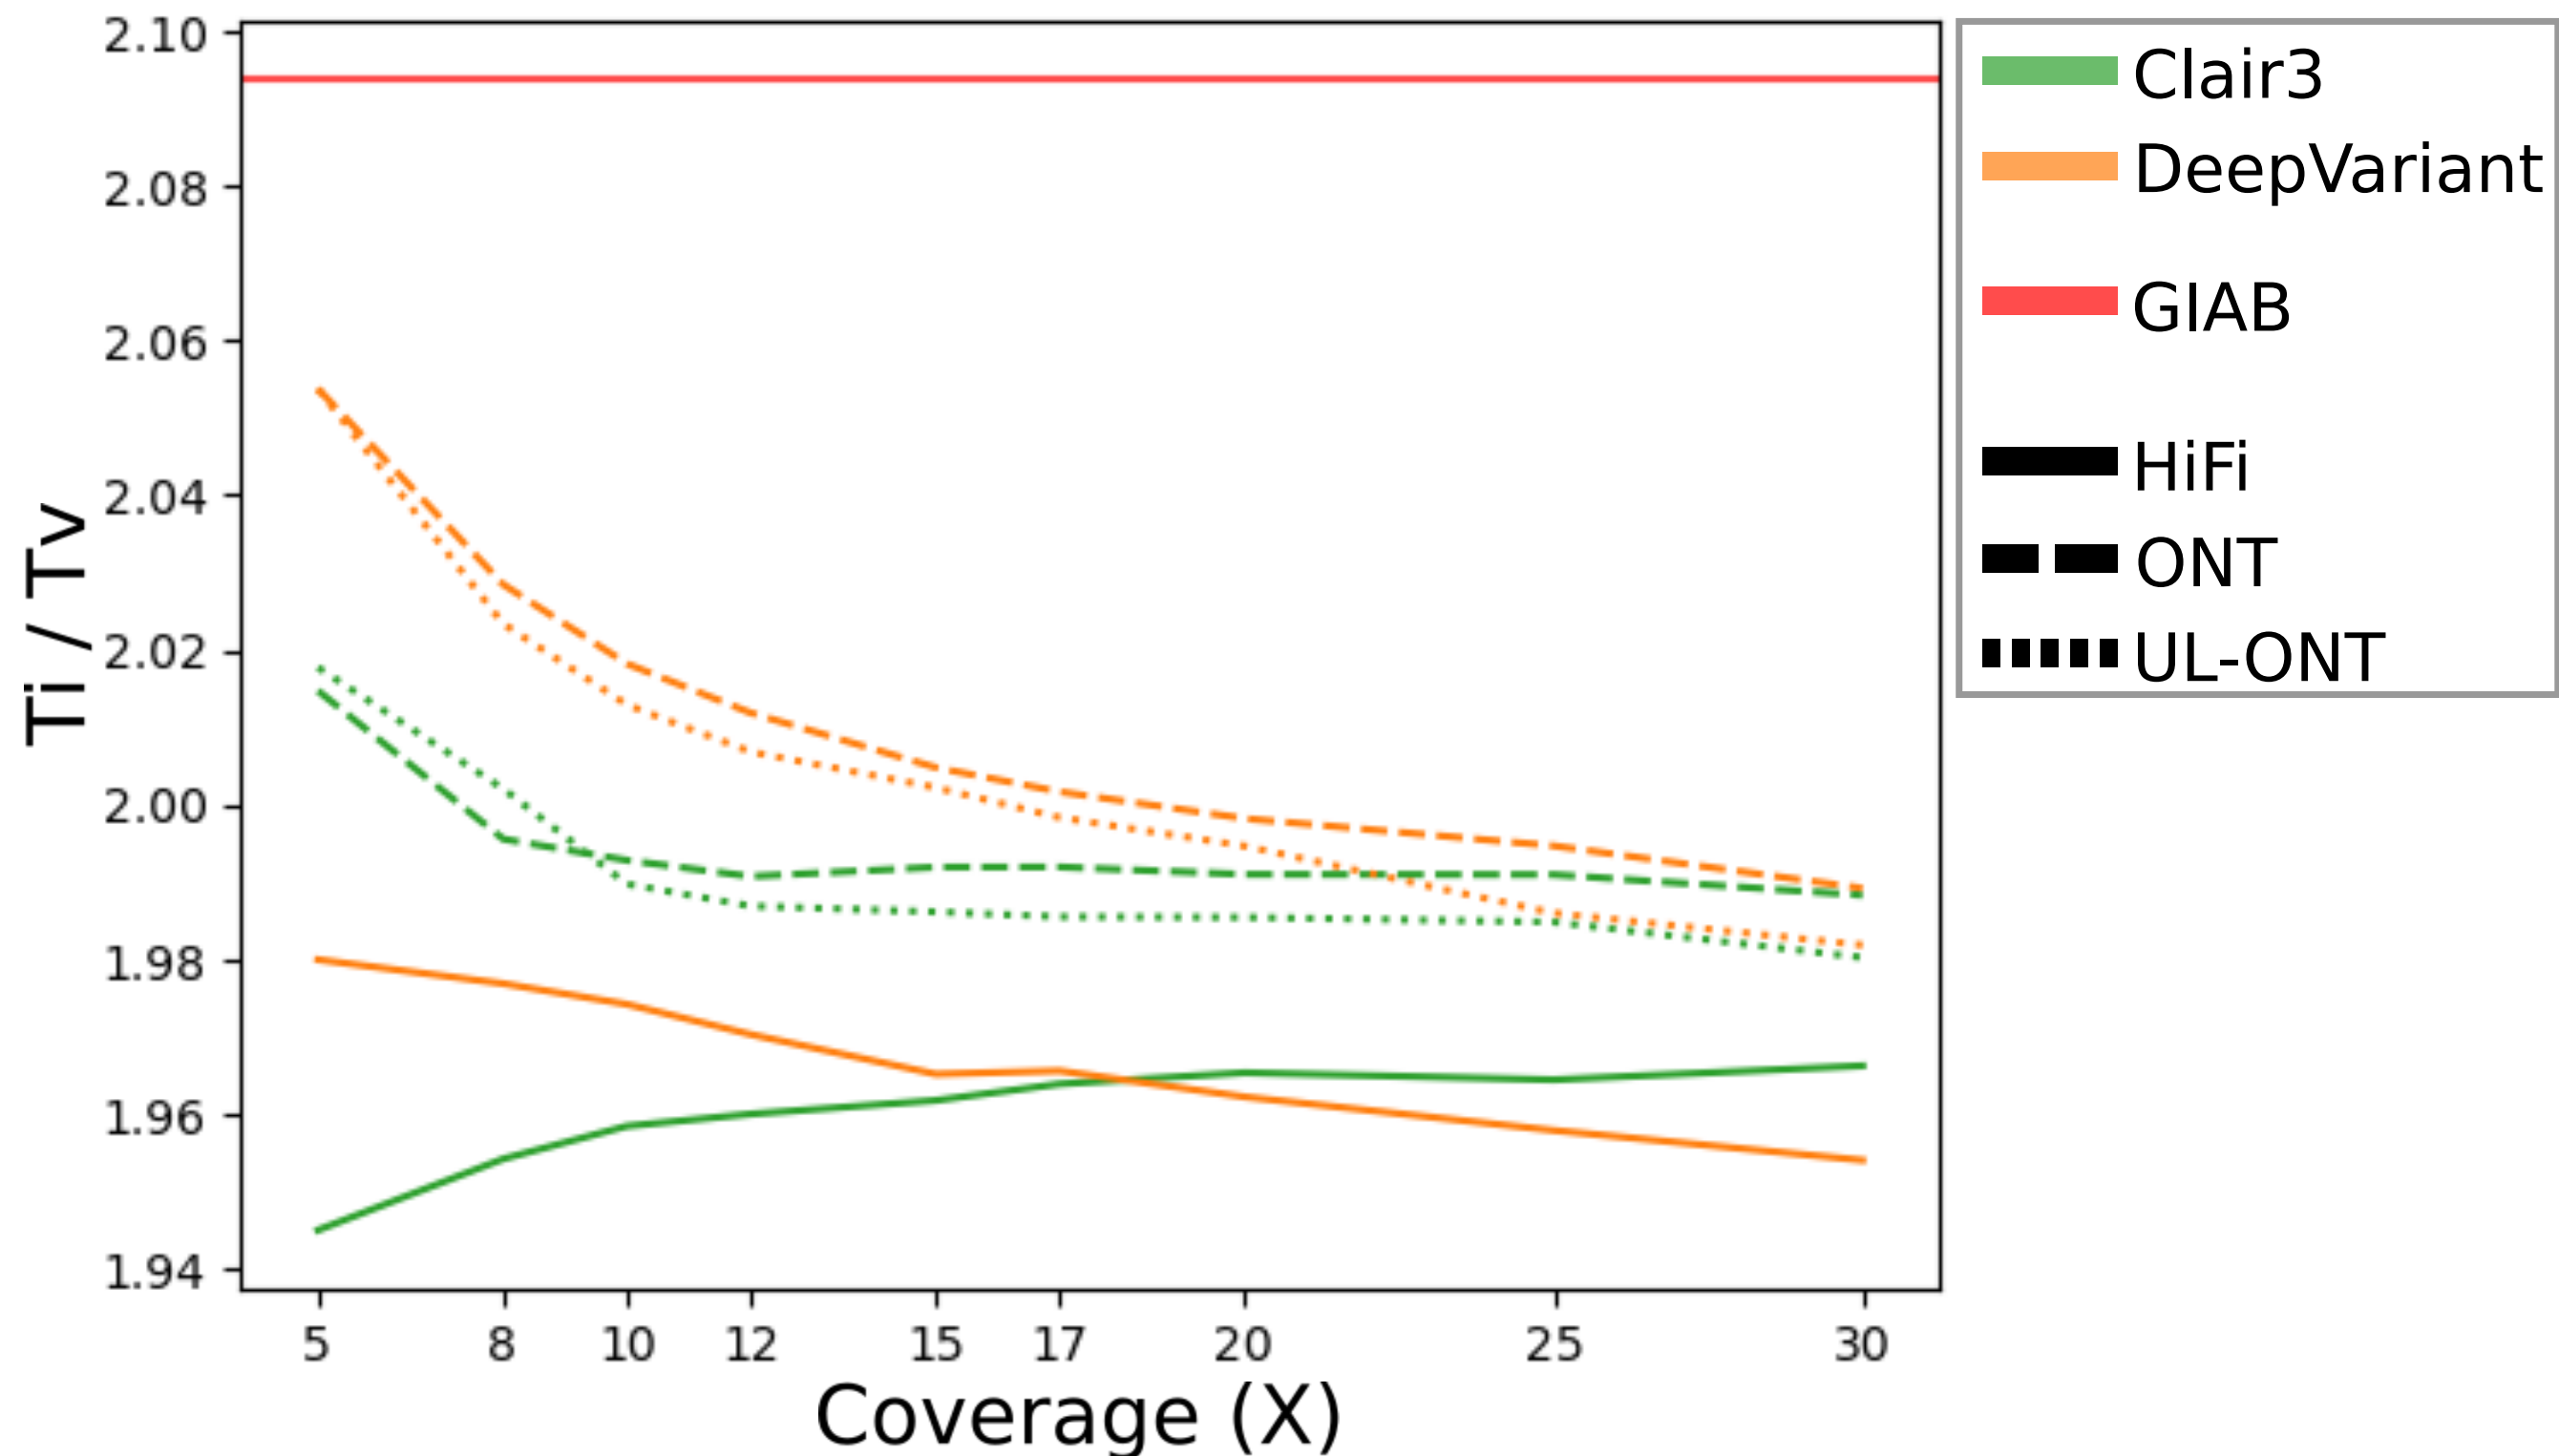**B****Ti/Tv HG002 - Assembly-based**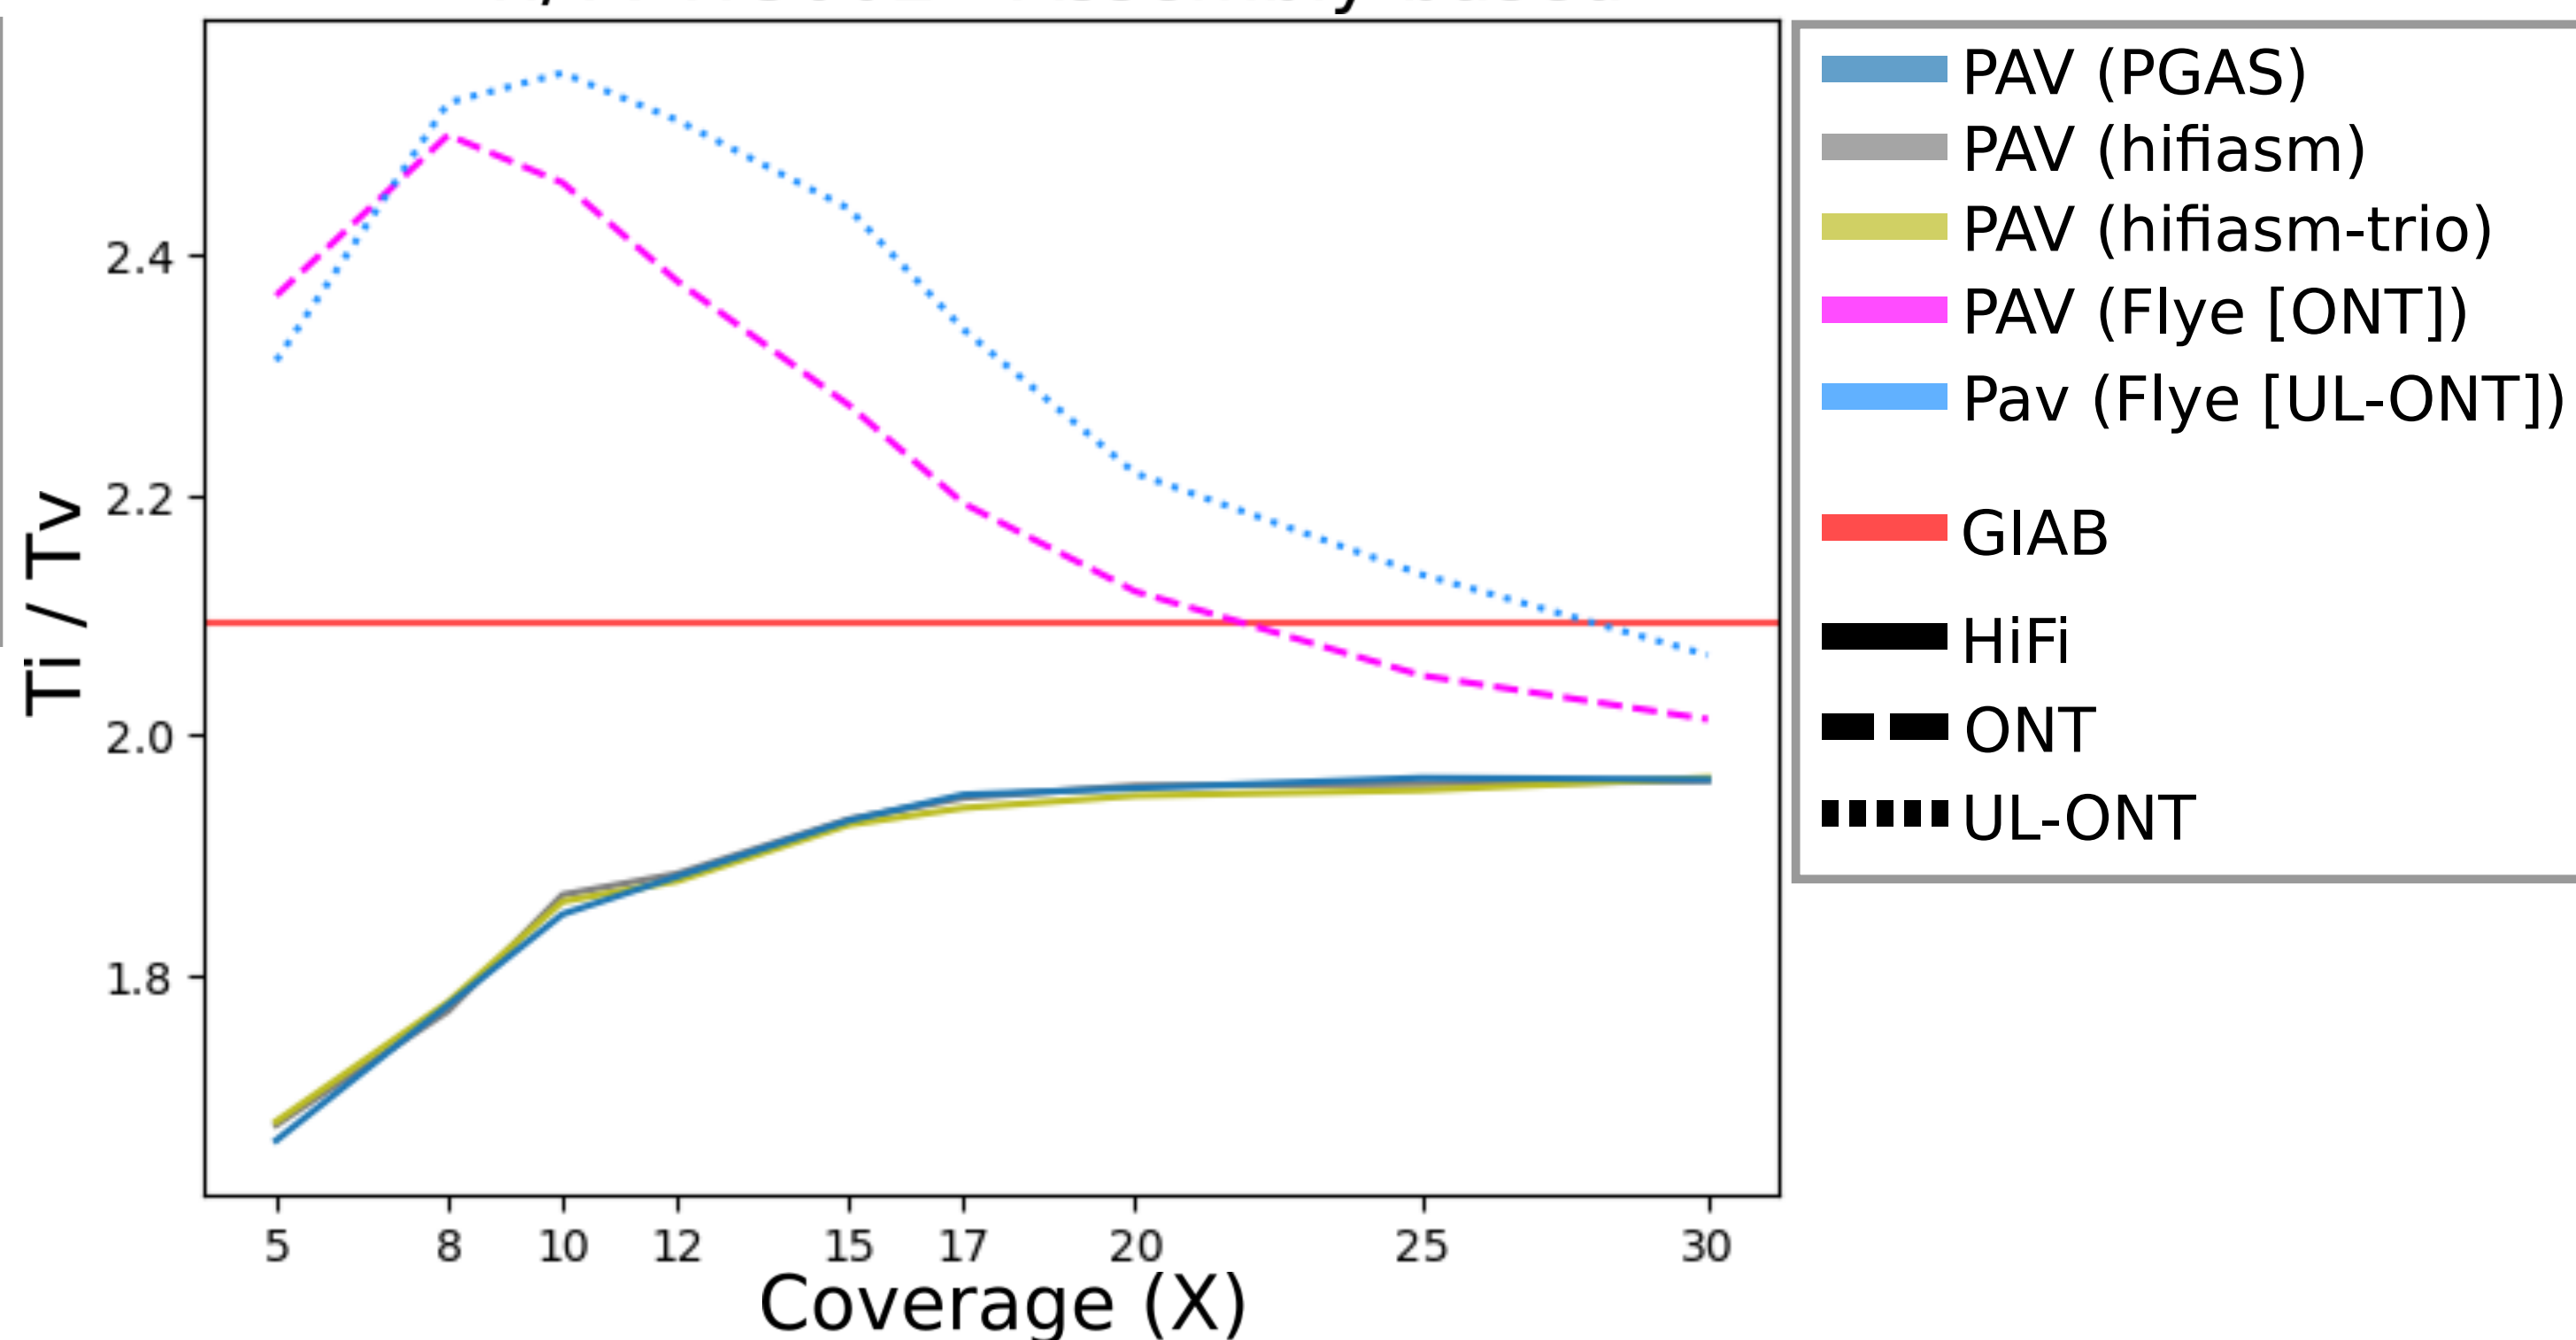

**Figure S12. Ti/Tv ratio of read-based and assembly-based callers in HG002 against GIAB. A)** The Ti/Tv ratio for SNVs called in HG002 via read-based methods. The Ti/Tv ratio for the GIAB truth set is slightly higher (2.09) than 2, and read-based callers are consistently below this range. **B)** The Ti/Tv ratio for SNVs called in HG002 via assembly-based methods. ONT-based assemblies show a noticeable peak of transitions below 17x, which drives the Ti/Tv ratio above 2.4.
